# Supplementary material for: Study of APOBEC3B focused breast cancer pathways and the clinical relevance
Source: Research Square preprint supplement (doi:10.21203/rs.3.rs-397072/v1), 2021-04-14
Supplement: Supplementary file 1 [file ff9263bd7f409353bc72a0c7.pdf]

**a****Pathological Stage Plot**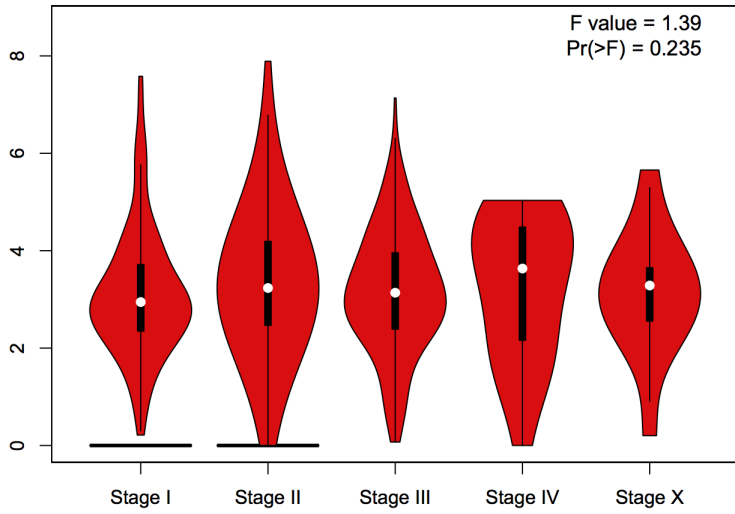**b**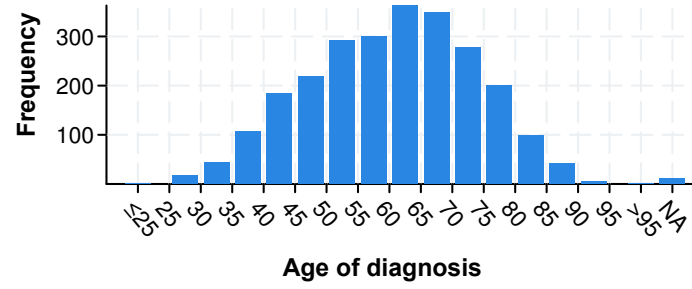**c**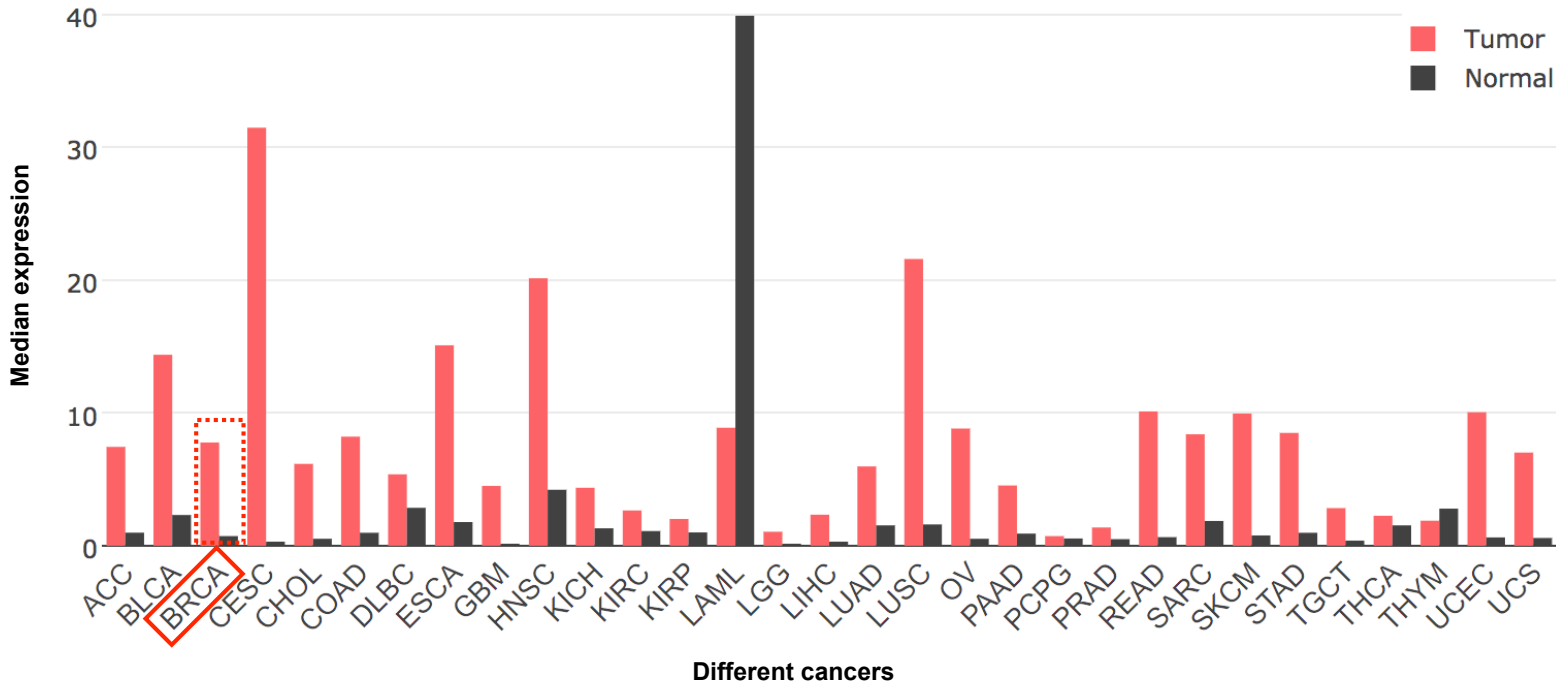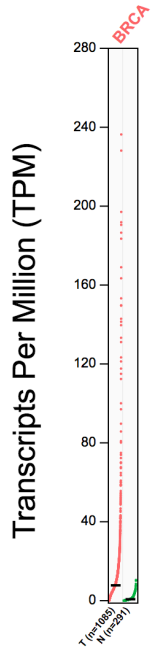

Supplementary data S3. The height of bar represents the median expression of certain tumor type or normal tissue.
