# Supplementary material for: Study of APOBEC3B focused breast cancer pathways and the clinical relevance
Source: Research Square preprint supplement (doi:10.21203/rs.3.rs-397072/v1), 2021-04-14
Supplement: Supplementary file 2 [file d2e278da764c250ab2e626fa.xlsx]

## Sheet: Top100SurvivalGenes
Gene name	Source of gene name	Gene description	GO term name
AHRR	HGNC Symbol	aryl-hydrocarbon receptor repressor [Source:HGNC Symbol;Acc:HGNC:346]
AHRR	HGNC Symbol	aryl-hydrocarbon receptor repressor [Source:HGNC Symbol;Acc:HGNC:346]	regulation of transcription, DNA-templated
AHRR	HGNC Symbol	aryl-hydrocarbon receptor repressor [Source:HGNC Symbol;Acc:HGNC:346]	protein dimerization activity
AHRR	HGNC Symbol	aryl-hydrocarbon receptor repressor [Source:HGNC Symbol;Acc:HGNC:346]	xenobiotic metabolic process
AHRR	HGNC Symbol	aryl-hydrocarbon receptor repressor [Source:HGNC Symbol;Acc:HGNC:346]	response to xenobiotic stimulus
AHRR	HGNC Symbol	aryl-hydrocarbon receptor repressor [Source:HGNC Symbol;Acc:HGNC:346]	nucleus
AHRR	HGNC Symbol	aryl-hydrocarbon receptor repressor [Source:HGNC Symbol;Acc:HGNC:346]	cytoplasm
AHRR	HGNC Symbol	aryl-hydrocarbon receptor repressor [Source:HGNC Symbol;Acc:HGNC:346]	nucleoplasm
AHRR	HGNC Symbol	aryl-hydrocarbon receptor repressor [Source:HGNC Symbol;Acc:HGNC:346]	cytosol
AHRR	HGNC Symbol	aryl-hydrocarbon receptor repressor [Source:HGNC Symbol;Acc:HGNC:346]	DNA binding
AHRR	HGNC Symbol	aryl-hydrocarbon receptor repressor [Source:HGNC Symbol;Acc:HGNC:346]	intracellular receptor signaling pathway
AHRR	HGNC Symbol	aryl-hydrocarbon receptor repressor [Source:HGNC Symbol;Acc:HGNC:346]	protein binding
AHRR	HGNC Symbol	aryl-hydrocarbon receptor repressor [Source:HGNC Symbol;Acc:HGNC:346]	negative regulation of transcription by RNA polymerase II
AHRR	HGNC Symbol	aryl-hydrocarbon receptor repressor [Source:HGNC Symbol;Acc:HGNC:346]	nuclear receptor activity
AHRR	HGNC Symbol	aryl-hydrocarbon receptor repressor [Source:HGNC Symbol;Acc:HGNC:346]	sequence-specific double-stranded DNA binding
AHRR	HGNC Symbol	aryl-hydrocarbon receptor repressor [Source:HGNC Symbol;Acc:HGNC:346]	positive regulation of transcription by RNA polymerase II
AHRR	HGNC Symbol	aryl-hydrocarbon receptor repressor [Source:HGNC Symbol;Acc:HGNC:346]	DNA-binding transcription factor activity, RNA polymerase II-specific
AHRR	HGNC Symbol	aryl-hydrocarbon receptor repressor [Source:HGNC Symbol;Acc:HGNC:346]	nuclear chromatin
AIFM1	HGNC Symbol	apoptosis inducing factor mitochondria associated 1 [Source:HGNC Symbol;Acc:HGNC:8768]
AIFM1	HGNC Symbol	apoptosis inducing factor mitochondria associated 1 [Source:HGNC Symbol;Acc:HGNC:8768]	flavin adenine dinucleotide binding
AIFM1	HGNC Symbol	apoptosis inducing factor mitochondria associated 1 [Source:HGNC Symbol;Acc:HGNC:8768]	oxidation-reduction process
AIFM1	HGNC Symbol	apoptosis inducing factor mitochondria associated 1 [Source:HGNC Symbol;Acc:HGNC:8768]	oxidoreductase activity
AIFM1	HGNC Symbol	apoptosis inducing factor mitochondria associated 1 [Source:HGNC Symbol;Acc:HGNC:8768]	protein dimerization activity
AIFM1	HGNC Symbol	apoptosis inducing factor mitochondria associated 1 [Source:HGNC Symbol;Acc:HGNC:8768]	apoptotic process
AIFM1	HGNC Symbol	apoptosis inducing factor mitochondria associated 1 [Source:HGNC Symbol;Acc:HGNC:8768]	mitochondrion
AIFM1	HGNC Symbol	apoptosis inducing factor mitochondria associated 1 [Source:HGNC Symbol;Acc:HGNC:8768]	nucleus
AIFM1	HGNC Symbol	apoptosis inducing factor mitochondria associated 1 [Source:HGNC Symbol;Acc:HGNC:8768]	cytoplasm
AIFM1	HGNC Symbol	apoptosis inducing factor mitochondria associated 1 [Source:HGNC Symbol;Acc:HGNC:8768]	membrane
AIFM1	HGNC Symbol	apoptosis inducing factor mitochondria associated 1 [Source:HGNC Symbol;Acc:HGNC:8768]	NAD(P)H oxidase (H(2)O(2)-forming activity
AIFM1	HGNC Symbol	apoptosis inducing factor mitochondria associated 1 [Source:HGNC Symbol;Acc:HGNC:8768]	mitochondrial inner membrane
AIFM1	HGNC Symbol	apoptosis inducing factor mitochondria associated 1 [Source:HGNC Symbol;Acc:HGNC:8768]	DNA binding
AIFM1	HGNC Symbol	apoptosis inducing factor mitochondria associated 1 [Source:HGNC Symbol;Acc:HGNC:8768]	cytosol
AIFM1	HGNC Symbol	apoptosis inducing factor mitochondria associated 1 [Source:HGNC Symbol;Acc:HGNC:8768]	protein binding
AIFM1	HGNC Symbol	apoptosis inducing factor mitochondria associated 1 [Source:HGNC Symbol;Acc:HGNC:8768]	chromosome condensation
AIFM1	HGNC Symbol	apoptosis inducing factor mitochondria associated 1 [Source:HGNC Symbol;Acc:HGNC:8768]	perinuclear region of cytoplasm
AIFM1	HGNC Symbol	apoptosis inducing factor mitochondria associated 1 [Source:HGNC Symbol;Acc:HGNC:8768]	mitochondrial intermembrane space
AIFM1	HGNC Symbol	apoptosis inducing factor mitochondria associated 1 [Source:HGNC Symbol;Acc:HGNC:8768]	positive regulation of apoptotic process
AIFM1	HGNC Symbol	apoptosis inducing factor mitochondria associated 1 [Source:HGNC Symbol;Acc:HGNC:8768]	activation of cysteine-type endopeptidase activity involved in apoptotic process
AIFM1	HGNC Symbol	apoptosis inducing factor mitochondria associated 1 [Source:HGNC Symbol;Acc:HGNC:8768]	FAD binding
AIFM1	HGNC Symbol	apoptosis inducing factor mitochondria associated 1 [Source:HGNC Symbol;Acc:HGNC:8768]	intrinsic apoptotic signaling pathway in response to endoplasmic reticulum stress
AIFM1	HGNC Symbol	apoptosis inducing factor mitochondria associated 1 [Source:HGNC Symbol;Acc:HGNC:8768]	oxidoreductase activity, acting on NAD(P)H
AIFM1	HGNC Symbol	apoptosis inducing factor mitochondria associated 1 [Source:HGNC Symbol;Acc:HGNC:8768]	mitochondrial respiratory chain complex assembly
AIFM1	HGNC Symbol	apoptosis inducing factor mitochondria associated 1 [Source:HGNC Symbol;Acc:HGNC:8768]	protein import into mitochondrial intermembrane space
AIFM1	HGNC Symbol	apoptosis inducing factor mitochondria associated 1 [Source:HGNC Symbol;Acc:HGNC:8768]	positive regulation of cell death
AIFM1	HGNC Symbol	apoptosis inducing factor mitochondria associated 1 [Source:HGNC Symbol;Acc:HGNC:8768]	neuron apoptotic process
AIFM1	HGNC Symbol	apoptosis inducing factor mitochondria associated 1 [Source:HGNC Symbol;Acc:HGNC:8768]	regulation of apoptotic DNA fragmentation
AIFM1	HGNC Symbol	apoptosis inducing factor mitochondria associated 1 [Source:HGNC Symbol;Acc:HGNC:8768]	response to ischemia
AIFM1	HGNC Symbol	apoptosis inducing factor mitochondria associated 1 [Source:HGNC Symbol;Acc:HGNC:8768]	response to toxic substance
AIFM1	HGNC Symbol	apoptosis inducing factor mitochondria associated 1 [Source:HGNC Symbol;Acc:HGNC:8768]	positive regulation of neuron apoptotic process
AIFM1	HGNC Symbol	apoptosis inducing factor mitochondria associated 1 [Source:HGNC Symbol;Acc:HGNC:8768]	cellular response to hydrogen peroxide
AIFM1	HGNC Symbol	apoptosis inducing factor mitochondria associated 1 [Source:HGNC Symbol;Acc:HGNC:8768]	cellular response to estradiol stimulus
AIFM1	HGNC Symbol	apoptosis inducing factor mitochondria associated 1 [Source:HGNC Symbol;Acc:HGNC:8768]	cellular response to nitric oxide
AIFM1	HGNC Symbol	apoptosis inducing factor mitochondria associated 1 [Source:HGNC Symbol;Acc:HGNC:8768]	cellular response to oxygen-glucose deprivation
AIFM1	HGNC Symbol	apoptosis inducing factor mitochondria associated 1 [Source:HGNC Symbol;Acc:HGNC:8768]	response to L-glutamate
AIFM1	HGNC Symbol	apoptosis inducing factor mitochondria associated 1 [Source:HGNC Symbol;Acc:HGNC:8768]	cellular response to aldosterone
AIFM1	HGNC Symbol	apoptosis inducing factor mitochondria associated 1 [Source:HGNC Symbol;Acc:HGNC:8768]	mitochondrial respiratory chain complex I assembly
AIFM1	HGNC Symbol	apoptosis inducing factor mitochondria associated 1 [Source:HGNC Symbol;Acc:HGNC:8768]	neuron differentiation
ALG3	HGNC Symbol	ALG3 alpha-1,3- mannosyltransferase [Source:HGNC Symbol;Acc:HGNC:23056]	mannosyltransferase activity
ALG3	HGNC Symbol	ALG3 alpha-1,3- mannosyltransferase [Source:HGNC Symbol;Acc:HGNC:23056]	integral component of endoplasmic reticulum membrane
ALG3	HGNC Symbol	ALG3 alpha-1,3- mannosyltransferase [Source:HGNC Symbol;Acc:HGNC:23056]	membrane
ALG3	HGNC Symbol	ALG3 alpha-1,3- mannosyltransferase [Source:HGNC Symbol;Acc:HGNC:23056]	integral component of membrane
ALG3	HGNC Symbol	ALG3 alpha-1,3- mannosyltransferase [Source:HGNC Symbol;Acc:HGNC:23056]	transferase activity
ALG3	HGNC Symbol	ALG3 alpha-1,3- mannosyltransferase [Source:HGNC Symbol;Acc:HGNC:23056]	endoplasmic reticulum
ALG3	HGNC Symbol	ALG3 alpha-1,3- mannosyltransferase [Source:HGNC Symbol;Acc:HGNC:23056]	endoplasmic reticulum membrane
ALG3	HGNC Symbol	ALG3 alpha-1,3- mannosyltransferase [Source:HGNC Symbol;Acc:HGNC:23056]	transferase activity, transferring glycosyl groups
ALG3	HGNC Symbol	ALG3 alpha-1,3- mannosyltransferase [Source:HGNC Symbol;Acc:HGNC:23056]	protein binding
ALG3	HGNC Symbol	ALG3 alpha-1,3- mannosyltransferase [Source:HGNC Symbol;Acc:HGNC:23056]	protein glycosylation
ALG3	HGNC Symbol	ALG3 alpha-1,3- mannosyltransferase [Source:HGNC Symbol;Acc:HGNC:23056]	mannosylation
ALG3	HGNC Symbol	ALG3 alpha-1,3- mannosyltransferase [Source:HGNC Symbol;Acc:HGNC:23056]	dol-P-Man:Man(5)GlcNAc(2)-PP-Dol alpha-1,3-mannosyltransferase activity
ALG3	HGNC Symbol	ALG3 alpha-1,3- mannosyltransferase [Source:HGNC Symbol;Acc:HGNC:23056]	alpha-1,3-mannosyltransferase activity
ALG3	HGNC Symbol	ALG3 alpha-1,3- mannosyltransferase [Source:HGNC Symbol;Acc:HGNC:23056]	dolichol-linked oligosaccharide biosynthetic process
ALG3	HGNC Symbol	ALG3 alpha-1,3- mannosyltransferase [Source:HGNC Symbol;Acc:HGNC:23056]
ARPP21	HGNC Symbol	cAMP regulated phosphoprotein 21 [Source:HGNC Symbol;Acc:HGNC:16968]
ARPP21	HGNC Symbol	cAMP regulated phosphoprotein 21 [Source:HGNC Symbol;Acc:HGNC:16968]	nucleic acid binding
ARPP21	HGNC Symbol	cAMP regulated phosphoprotein 21 [Source:HGNC Symbol;Acc:HGNC:16968]	cytoplasm
ARPP21	HGNC Symbol	cAMP regulated phosphoprotein 21 [Source:HGNC Symbol;Acc:HGNC:16968]	protein binding
ARPP21	HGNC Symbol	cAMP regulated phosphoprotein 21 [Source:HGNC Symbol;Acc:HGNC:16968]	calmodulin binding
ARPP21	HGNC Symbol	cAMP regulated phosphoprotein 21 [Source:HGNC Symbol;Acc:HGNC:16968]	molecular_function
ARPP21	HGNC Symbol	cAMP regulated phosphoprotein 21 [Source:HGNC Symbol;Acc:HGNC:16968]	biological_process
ARPP21	HGNC Symbol	cAMP regulated phosphoprotein 21 [Source:HGNC Symbol;Acc:HGNC:16968]	cellular_component
ARPP21	HGNC Symbol	cAMP regulated phosphoprotein 21 [Source:HGNC Symbol;Acc:HGNC:16968]	cellular response to heat
ATG4A	HGNC Symbol	autophagy related 4A cysteine peptidase [Source:HGNC Symbol;Acc:HGNC:16489]	cysteine-type endopeptidase activity
ATG4A	HGNC Symbol	autophagy related 4A cysteine peptidase [Source:HGNC Symbol;Acc:HGNC:16489]	autophagy
ATG4A	HGNC Symbol	autophagy related 4A cysteine peptidase [Source:HGNC Symbol;Acc:HGNC:16489]	cytoplasm
ATG4A	HGNC Symbol	autophagy related 4A cysteine peptidase [Source:HGNC Symbol;Acc:HGNC:16489]	protein transport
ATG4A	HGNC Symbol	autophagy related 4A cysteine peptidase [Source:HGNC Symbol;Acc:HGNC:16489]	peptidase activity
ATG4A	HGNC Symbol	autophagy related 4A cysteine peptidase [Source:HGNC Symbol;Acc:HGNC:16489]	cysteine-type peptidase activity
ATG4A	HGNC Symbol	autophagy related 4A cysteine peptidase [Source:HGNC Symbol;Acc:HGNC:16489]	proteolysis
ATG4A	HGNC Symbol	autophagy related 4A cysteine peptidase [Source:HGNC Symbol;Acc:HGNC:16489]	hydrolase activity
ATG4A	HGNC Symbol	autophagy related 4A cysteine peptidase [Source:HGNC Symbol;Acc:HGNC:16489]	protein binding
ATG4A	HGNC Symbol	autophagy related 4A cysteine peptidase [Source:HGNC Symbol;Acc:HGNC:16489]
BCAP31	HGNC Symbol	B cell receptor associated protein 31 [Source:HGNC Symbol;Acc:HGNC:16695]	integral component of membrane
BCAP31	HGNC Symbol	B cell receptor associated protein 31 [Source:HGNC Symbol;Acc:HGNC:16695]	endoplasmic reticulum
BCAP31	HGNC Symbol	B cell receptor associated protein 31 [Source:HGNC Symbol;Acc:HGNC:16695]	intracellular protein transport
BCAP31	HGNC Symbol	B cell receptor associated protein 31 [Source:HGNC Symbol;Acc:HGNC:16695]	mitochondrion
BCAP31	HGNC Symbol	B cell receptor associated protein 31 [Source:HGNC Symbol;Acc:HGNC:16695]	membrane
BCAP31	HGNC Symbol	B cell receptor associated protein 31 [Source:HGNC Symbol;Acc:HGNC:16695]	protein transport
BCAP31	HGNC Symbol	B cell receptor associated protein 31 [Source:HGNC Symbol;Acc:HGNC:16695]	endoplasmic reticulum membrane
BCAP31	HGNC Symbol	B cell receptor associated protein 31 [Source:HGNC Symbol;Acc:HGNC:16695]	apoptotic process
BCAP31	HGNC Symbol	B cell receptor associated protein 31 [Source:HGNC Symbol;Acc:HGNC:16695]	vesicle-mediated transport
BCAP31	HGNC Symbol	B cell receptor associated protein 31 [Source:HGNC Symbol;Acc:HGNC:16695]	protein binding
BCAP31	HGNC Symbol	B cell receptor associated protein 31 [Source:HGNC Symbol;Acc:HGNC:16695]	viral process
BCAP31	HGNC Symbol	B cell receptor associated protein 31 [Source:HGNC Symbol;Acc:HGNC:16695]	endoplasmic reticulum-Golgi intermediate compartment membrane
BCAP31	HGNC Symbol	B cell receptor associated protein 31 [Source:HGNC Symbol;Acc:HGNC:16695]	lipid droplet
BCAP31	HGNC Symbol	B cell receptor associated protein 31 [Source:HGNC Symbol;Acc:HGNC:16695]	integral component of plasma membrane
BCAP31	HGNC Symbol	B cell receptor associated protein 31 [Source:HGNC Symbol;Acc:HGNC:16695]	endoplasmic reticulum to Golgi vesicle-mediated transport
BCAP31	HGNC Symbol	B cell receptor associated protein 31 [Source:HGNC Symbol;Acc:HGNC:16695]	cytosol
BCAP31	HGNC Symbol	B cell receptor associated protein 31 [Source:HGNC Symbol;Acc:HGNC:16695]	positive regulation of intrinsic apoptotic signaling pathway
BCAP31	HGNC Symbol	B cell receptor associated protein 31 [Source:HGNC Symbol;Acc:HGNC:16695]	response to endoplasmic reticulum stress
BCAP31	HGNC Symbol	B cell receptor associated protein 31 [Source:HGNC Symbol;Acc:HGNC:16695]	positive regulation of cytosolic calcium ion concentration
BCAP31	HGNC Symbol	B cell receptor associated protein 31 [Source:HGNC Symbol;Acc:HGNC:16695]	positive regulation of cysteine-type endopeptidase activity involved in apoptotic process
BCAP31	HGNC Symbol	B cell receptor associated protein 31 [Source:HGNC Symbol;Acc:HGNC:16695]	protein localization to endoplasmic reticulum exit site
BCAP31	HGNC Symbol	B cell receptor associated protein 31 [Source:HGNC Symbol;Acc:HGNC:16695]	antigen processing and presentation of peptide antigen via MHC class I
BCAP31	HGNC Symbol	B cell receptor associated protein 31 [Source:HGNC Symbol;Acc:HGNC:16695]	integral component of lumenal side of endoplasmic reticulum membrane
BCAP31	HGNC Symbol	B cell receptor associated protein 31 [Source:HGNC Symbol;Acc:HGNC:16695]	positive regulation of ER-associated ubiquitin-dependent protein catabolic process
BCAP31	HGNC Symbol	B cell receptor associated protein 31 [Source:HGNC Symbol;Acc:HGNC:16695]	mitochondria-associated endoplasmic reticulum membrane
BCAP31	HGNC Symbol	B cell receptor associated protein 31 [Source:HGNC Symbol;Acc:HGNC:16695]	calcium-mediated signaling using intracellular calcium source
BCAP31	HGNC Symbol	B cell receptor associated protein 31 [Source:HGNC Symbol;Acc:HGNC:16695]	protein targeting to mitochondrion
BCAP31	HGNC Symbol	B cell receptor associated protein 31 [Source:HGNC Symbol;Acc:HGNC:16695]	negative regulation of endoplasmic reticulum calcium ion concentration
BCAP31	HGNC Symbol	B cell receptor associated protein 31 [Source:HGNC Symbol;Acc:HGNC:16695]	positive regulation of mitochondrial calcium ion concentration
BCAP31	HGNC Symbol	B cell receptor associated protein 31 [Source:HGNC Symbol;Acc:HGNC:16695]	MHC class I protein binding
BCAP31	HGNC Symbol	B cell receptor associated protein 31 [Source:HGNC Symbol;Acc:HGNC:16695]	protein-containing complex binding
BCAP31	HGNC Symbol	B cell receptor associated protein 31 [Source:HGNC Symbol;Acc:HGNC:16695]	spermatogenesis
BCAP31	HGNC Symbol	B cell receptor associated protein 31 [Source:HGNC Symbol;Acc:HGNC:16695]	positive regulation of retrograde protein transport, ER to cytosol
BCAP31	HGNC Symbol	B cell receptor associated protein 31 [Source:HGNC Symbol;Acc:HGNC:16695]	Golgi membrane
BCAP31	HGNC Symbol	B cell receptor associated protein 31 [Source:HGNC Symbol;Acc:HGNC:16695]	clathrin-coated vesicle
BCAP31	HGNC Symbol	B cell receptor associated protein 31 [Source:HGNC Symbol;Acc:HGNC:16695]	Golgi cisterna membrane
BCAP31	HGNC Symbol	B cell receptor associated protein 31 [Source:HGNC Symbol;Acc:HGNC:16695]	perinuclear endoplasmic reticulum
BCAP31	HGNC Symbol	B cell receptor associated protein 31 [Source:HGNC Symbol;Acc:HGNC:16695]
C10orf67	HGNC Symbol	chromosome 10 open reading frame 67 [Source:HGNC Symbol;Acc:HGNC:28716]
C10orf67	HGNC Symbol	chromosome 10 open reading frame 67 [Source:HGNC Symbol;Acc:HGNC:28716]	mitochondrion
C10orf67	HGNC Symbol	chromosome 10 open reading frame 67 [Source:HGNC Symbol;Acc:HGNC:28716]	protein binding
C8orf33	HGNC Symbol	chromosome 8 open reading frame 33 [Source:HGNC Symbol;Acc:HGNC:26104]	protein binding
C8orf33	HGNC Symbol	chromosome 8 open reading frame 33 [Source:HGNC Symbol;Acc:HGNC:26104]
C8orf76	HGNC Symbol	chromosome 8 open reading frame 76 [Source:HGNC Symbol;Acc:HGNC:25924]	protein binding
C8orf76	HGNC Symbol	chromosome 8 open reading frame 76 [Source:HGNC Symbol;Acc:HGNC:25924]
CCDC24	HGNC Symbol	coiled-coil domain containing 24 [Source:HGNC Symbol;Acc:HGNC:28688]
CCDC24	HGNC Symbol	coiled-coil domain containing 24 [Source:HGNC Symbol;Acc:HGNC:28688]	protein binding
CCDC24	HGNC Symbol	coiled-coil domain containing 24 [Source:HGNC Symbol;Acc:HGNC:28688]	blastocyst hatching
CD24	HGNC Symbol	CD24 molecule [Source:HGNC Symbol;Acc:HGNC:1645]	cell adhesion
CD24	HGNC Symbol	CD24 molecule [Source:HGNC Symbol;Acc:HGNC:1645]	membrane
CD24	HGNC Symbol	CD24 molecule [Source:HGNC Symbol;Acc:HGNC:1645]	plasma membrane
CD24	HGNC Symbol	CD24 molecule [Source:HGNC Symbol;Acc:HGNC:1645]	membrane raft
CD24	HGNC Symbol	CD24 molecule [Source:HGNC Symbol;Acc:HGNC:1645]	Wnt signaling pathway
CD24	HGNC Symbol	CD24 molecule [Source:HGNC Symbol;Acc:HGNC:1645]	protein binding
CD24	HGNC Symbol	CD24 molecule [Source:HGNC Symbol;Acc:HGNC:1645]	cell surface
CD24	HGNC Symbol	CD24 molecule [Source:HGNC Symbol;Acc:HGNC:1645]	anchored component of membrane
CD24	HGNC Symbol	CD24 molecule [Source:HGNC Symbol;Acc:HGNC:1645]	positive regulation of protein tyrosine kinase activity
CD24	HGNC Symbol	CD24 molecule [Source:HGNC Symbol;Acc:HGNC:1645]	protein kinase binding
CD24	HGNC Symbol	CD24 molecule [Source:HGNC Symbol;Acc:HGNC:1645]	cell migration
CD24	HGNC Symbol	CD24 molecule [Source:HGNC Symbol;Acc:HGNC:1645]	anchored component of external side of plasma membrane
CD24	HGNC Symbol	CD24 molecule [Source:HGNC Symbol;Acc:HGNC:1645]	response to hypoxia
CD24	HGNC Symbol	CD24 molecule [Source:HGNC Symbol;Acc:HGNC:1645]	response to molecule of bacterial origin
CD24	HGNC Symbol	CD24 molecule [Source:HGNC Symbol;Acc:HGNC:1645]	positive regulation of cytosolic calcium ion concentration
CD24	HGNC Symbol	CD24 molecule [Source:HGNC Symbol;Acc:HGNC:1645]	intrinsic apoptotic signaling pathway
CD24	HGNC Symbol	CD24 molecule [Source:HGNC Symbol;Acc:HGNC:1645]	response to estrogen
CD24	HGNC Symbol	CD24 molecule [Source:HGNC Symbol;Acc:HGNC:1645]	cholesterol homeostasis
CD24	HGNC Symbol	CD24 molecule [Source:HGNC Symbol;Acc:HGNC:1645]	cell-cell adhesion
CD24	HGNC Symbol	CD24 molecule [Source:HGNC Symbol;Acc:HGNC:1645]	regulation of epithelial cell differentiation
CD24	HGNC Symbol	CD24 molecule [Source:HGNC Symbol;Acc:HGNC:1645]	glomerular visceral epithelial cell differentiation
CD24	HGNC Symbol	CD24 molecule [Source:HGNC Symbol;Acc:HGNC:1645]	glomerular parietal epithelial cell differentiation
CD24	HGNC Symbol	CD24 molecule [Source:HGNC Symbol;Acc:HGNC:1645]	positive regulation of nephron tubule epithelial cell differentiation
CD24	HGNC Symbol	CD24 molecule [Source:HGNC Symbol;Acc:HGNC:1645]	T cell costimulation
CD24	HGNC Symbol	CD24 molecule [Source:HGNC Symbol;Acc:HGNC:1645]	regulation of MAPK cascade
CD24	HGNC Symbol	CD24 molecule [Source:HGNC Symbol;Acc:HGNC:1645]	regulation of phosphorylation
CD24	HGNC Symbol	CD24 molecule [Source:HGNC Symbol;Acc:HGNC:1645]	positive regulation of activated T cell proliferation
CD24	HGNC Symbol	CD24 molecule [Source:HGNC Symbol;Acc:HGNC:1645]	positive regulation of MAP kinase activity
CD24	HGNC Symbol	CD24 molecule [Source:HGNC Symbol;Acc:HGNC:1645]	immune response-regulating cell surface receptor signaling pathway
CD24	HGNC Symbol	CD24 molecule [Source:HGNC Symbol;Acc:HGNC:1645]	respiratory burst
CD24	HGNC Symbol	CD24 molecule [Source:HGNC Symbol;Acc:HGNC:1645]	cell activation
CD24	HGNC Symbol	CD24 molecule [Source:HGNC Symbol;Acc:HGNC:1645]	protein tyrosine kinase activator activity
CD24	HGNC Symbol	CD24 molecule [Source:HGNC Symbol;Acc:HGNC:1645]	regulation of cytokine-mediated signaling pathway
CD24	HGNC Symbol	CD24 molecule [Source:HGNC Symbol;Acc:HGNC:1645]	B cell receptor transport into membrane raft
CD24	HGNC Symbol	CD24 molecule [Source:HGNC Symbol;Acc:HGNC:1645]	chemokine receptor transport out of membrane raft
CD24	HGNC Symbol	CD24 molecule [Source:HGNC Symbol;Acc:HGNC:1645]	negative regulation of transforming growth factor beta3 production
CD24	HGNC Symbol	CD24 molecule [Source:HGNC Symbol;Acc:HGNC:1645]	intracellular membrane-bounded organelle
CD24	HGNC Symbol	CD24 molecule [Source:HGNC Symbol;Acc:HGNC:1645]
CD3E	HGNC Symbol	CD3e molecule [Source:HGNC Symbol;Acc:HGNC:1674]
CD3E	HGNC Symbol	CD3e molecule [Source:HGNC Symbol;Acc:HGNC:1674]	membrane
CD3E	HGNC Symbol	CD3e molecule [Source:HGNC Symbol;Acc:HGNC:1674]	cell surface receptor signaling pathway
CD3E	HGNC Symbol	CD3e molecule [Source:HGNC Symbol;Acc:HGNC:1674]	transmembrane signaling receptor activity
CD3E	HGNC Symbol	CD3e molecule [Source:HGNC Symbol;Acc:HGNC:1674]	integral component of membrane
CD3E	HGNC Symbol	CD3e molecule [Source:HGNC Symbol;Acc:HGNC:1674]	plasma membrane
CD3E	HGNC Symbol	CD3e molecule [Source:HGNC Symbol;Acc:HGNC:1674]	SH3 domain binding
CD3E	HGNC Symbol	CD3e molecule [Source:HGNC Symbol;Acc:HGNC:1674]	protein binding
CD3E	HGNC Symbol	CD3e molecule [Source:HGNC Symbol;Acc:HGNC:1674]	immune system process
CD3E	HGNC Symbol	CD3e molecule [Source:HGNC Symbol;Acc:HGNC:1674]	adaptive immune response
CD3E	HGNC Symbol	CD3e molecule [Source:HGNC Symbol;Acc:HGNC:1674]	external side of plasma membrane
CD3E	HGNC Symbol	CD3e molecule [Source:HGNC Symbol;Acc:HGNC:1674]	T cell receptor complex
CD3E	HGNC Symbol	CD3e molecule [Source:HGNC Symbol;Acc:HGNC:1674]	regulation of immune response
CD3E	HGNC Symbol	CD3e molecule [Source:HGNC Symbol;Acc:HGNC:1674]	integral component of plasma membrane
CD3E	HGNC Symbol	CD3e molecule [Source:HGNC Symbol;Acc:HGNC:1674]	T cell receptor signaling pathway
CD3E	HGNC Symbol	CD3e molecule [Source:HGNC Symbol;Acc:HGNC:1674]	protein kinase binding
CD3E	HGNC Symbol	CD3e molecule [Source:HGNC Symbol;Acc:HGNC:1674]	positive regulation of gene expression
CD3E	HGNC Symbol	CD3e molecule [Source:HGNC Symbol;Acc:HGNC:1674]	positive regulation of T cell proliferation
CD3E	HGNC Symbol	CD3e molecule [Source:HGNC Symbol;Acc:HGNC:1674]	regulation of apoptotic process
CD3E	HGNC Symbol	CD3e molecule [Source:HGNC Symbol;Acc:HGNC:1674]	G protein-coupled receptor signaling pathway
CD3E	HGNC Symbol	CD3e molecule [Source:HGNC Symbol;Acc:HGNC:1674]	negative regulation of gene expression
CD3E	HGNC Symbol	CD3e molecule [Source:HGNC Symbol;Acc:HGNC:1674]	protein heterodimerization activity
CD3E	HGNC Symbol	CD3e molecule [Source:HGNC Symbol;Acc:HGNC:1674]	T cell activation
CD3E	HGNC Symbol	CD3e molecule [Source:HGNC Symbol;Acc:HGNC:1674]	protein-containing complex assembly
CD3E	HGNC Symbol	CD3e molecule [Source:HGNC Symbol;Acc:HGNC:1674]	transmembrane receptor protein tyrosine kinase signaling pathway
CD3E	HGNC Symbol	CD3e molecule [Source:HGNC Symbol;Acc:HGNC:1674]	positive regulation of cell-matrix adhesion
CD3E	HGNC Symbol	CD3e molecule [Source:HGNC Symbol;Acc:HGNC:1674]	identical protein binding
CD3E	HGNC Symbol	CD3e molecule [Source:HGNC Symbol;Acc:HGNC:1674]	signaling receptor complex adaptor activity
CD3E	HGNC Symbol	CD3e molecule [Source:HGNC Symbol;Acc:HGNC:1674]	positive regulation of cell-cell adhesion mediated by integrin
CD3E	HGNC Symbol	CD3e molecule [Source:HGNC Symbol;Acc:HGNC:1674]	T cell differentiation
CD3E	HGNC Symbol	CD3e molecule [Source:HGNC Symbol;Acc:HGNC:1674]	positive thymic T cell selection
CD3E	HGNC Symbol	CD3e molecule [Source:HGNC Symbol;Acc:HGNC:1674]	alpha-beta T cell receptor complex
CD3E	HGNC Symbol	CD3e molecule [Source:HGNC Symbol;Acc:HGNC:1674]	T cell receptor binding
CD3E	HGNC Symbol	CD3e molecule [Source:HGNC Symbol;Acc:HGNC:1674]	positive regulation of T cell anergy
CD3E	HGNC Symbol	CD3e molecule [Source:HGNC Symbol;Acc:HGNC:1674]	signal complex assembly
CD3E	HGNC Symbol	CD3e molecule [Source:HGNC Symbol;Acc:HGNC:1674]	response to nutrient
CD3E	HGNC Symbol	CD3e molecule [Source:HGNC Symbol;Acc:HGNC:1674]	dendrite development
CD3E	HGNC Symbol	CD3e molecule [Source:HGNC Symbol;Acc:HGNC:1674]	cerebellum development
CD3E	HGNC Symbol	CD3e molecule [Source:HGNC Symbol;Acc:HGNC:1674]	T cell costimulation
CD3E	HGNC Symbol	CD3e molecule [Source:HGNC Symbol;Acc:HGNC:1674]	positive regulation of interferon-gamma production
CD3E	HGNC Symbol	CD3e molecule [Source:HGNC Symbol;Acc:HGNC:1674]	positive regulation of interleukin-2 production
CD3E	HGNC Symbol	CD3e molecule [Source:HGNC Symbol;Acc:HGNC:1674]	positive regulation of interleukin-4 production
CD3E	HGNC Symbol	CD3e molecule [Source:HGNC Symbol;Acc:HGNC:1674]	T cell differentiation in thymus
CD3E	HGNC Symbol	CD3e molecule [Source:HGNC Symbol;Acc:HGNC:1674]	negative thymic T cell selection
CD3E	HGNC Symbol	CD3e molecule [Source:HGNC Symbol;Acc:HGNC:1674]	negative regulation of smoothened signaling pathway
CD3E	HGNC Symbol	CD3e molecule [Source:HGNC Symbol;Acc:HGNC:1674]	positive regulation of alpha-beta T cell proliferation
CD3E	HGNC Symbol	CD3e molecule [Source:HGNC Symbol;Acc:HGNC:1674]	lymphocyte activation
CD3E	HGNC Symbol	CD3e molecule [Source:HGNC Symbol;Acc:HGNC:1674]	positive regulation of peptidyl-tyrosine phosphorylation
CD3E	HGNC Symbol	CD3e molecule [Source:HGNC Symbol;Acc:HGNC:1674]	positive regulation of calcium-mediated signaling
CD3E	HGNC Symbol	CD3e molecule [Source:HGNC Symbol;Acc:HGNC:1674]	positive regulation of T cell activation
CD3E	HGNC Symbol	CD3e molecule [Source:HGNC Symbol;Acc:HGNC:1674]	apoptotic signaling pathway
CD3E	HGNC Symbol	CD3e molecule [Source:HGNC Symbol;Acc:HGNC:1674]	immunological synapse
CD3E	HGNC Symbol	CD3e molecule [Source:HGNC Symbol;Acc:HGNC:1674]	cell-cell junction
CD3E	HGNC Symbol	CD3e molecule [Source:HGNC Symbol;Acc:HGNC:1674]	dendritic spine
CD3E	HGNC Symbol	CD3e molecule [Source:HGNC Symbol;Acc:HGNC:1674]	cell body
CD40LG	HGNC Symbol	CD40 ligand [Source:HGNC Symbol;Acc:HGNC:11935]	protein binding
CD40LG	HGNC Symbol	CD40 ligand [Source:HGNC Symbol;Acc:HGNC:11935]	membrane
CD40LG	HGNC Symbol	CD40 ligand [Source:HGNC Symbol;Acc:HGNC:11935]	immune response
CD40LG	HGNC Symbol	CD40 ligand [Source:HGNC Symbol;Acc:HGNC:11935]	tumor necrosis factor receptor binding
CD40LG	HGNC Symbol	CD40 ligand [Source:HGNC Symbol;Acc:HGNC:11935]	positive regulation of endothelial cell apoptotic process
CD40LG	HGNC Symbol	CD40 ligand [Source:HGNC Symbol;Acc:HGNC:11935]	integral component of membrane
CD40LG	HGNC Symbol	CD40 ligand [Source:HGNC Symbol;Acc:HGNC:11935]	negative regulation of apoptotic process
CD40LG	HGNC Symbol	CD40 ligand [Source:HGNC Symbol;Acc:HGNC:11935]	plasma membrane
CD40LG	HGNC Symbol	CD40 ligand [Source:HGNC Symbol;Acc:HGNC:11935]	extracellular region
CD40LG	HGNC Symbol	CD40 ligand [Source:HGNC Symbol;Acc:HGNC:11935]	extracellular space
CD40LG	HGNC Symbol	CD40 ligand [Source:HGNC Symbol;Acc:HGNC:11935]	cell surface
CD40LG	HGNC Symbol	CD40 ligand [Source:HGNC Symbol;Acc:HGNC:11935]	cytokine activity
CD40LG	HGNC Symbol	CD40 ligand [Source:HGNC Symbol;Acc:HGNC:11935]	inflammatory response
CD40LG	HGNC Symbol	CD40 ligand [Source:HGNC Symbol;Acc:HGNC:11935]	integrin-mediated signaling pathway
CD40LG	HGNC Symbol	CD40 ligand [Source:HGNC Symbol;Acc:HGNC:11935]	regulation of immune response
CD40LG	HGNC Symbol	CD40 ligand [Source:HGNC Symbol;Acc:HGNC:11935]	tumor necrosis factor-mediated signaling pathway
CD40LG	HGNC Symbol	CD40 ligand [Source:HGNC Symbol;Acc:HGNC:11935]	positive regulation of T cell proliferation
CD40LG	HGNC Symbol	CD40 ligand [Source:HGNC Symbol;Acc:HGNC:11935]	positive regulation of interleukin-10 production
CD40LG	HGNC Symbol	CD40 ligand [Source:HGNC Symbol;Acc:HGNC:11935]	integral component of plasma membrane
CD40LG	HGNC Symbol	CD40 ligand [Source:HGNC Symbol;Acc:HGNC:11935]	positive regulation of interleukin-12 production
CD40LG	HGNC Symbol	CD40 ligand [Source:HGNC Symbol;Acc:HGNC:11935]	positive regulation of interleukin-4 production
CD40LG	HGNC Symbol	CD40 ligand [Source:HGNC Symbol;Acc:HGNC:11935]	positive regulation of NF-kappaB transcription factor activity
CD40LG	HGNC Symbol	CD40 ligand [Source:HGNC Symbol;Acc:HGNC:11935]	integrin binding
CD40LG	HGNC Symbol	CD40 ligand [Source:HGNC Symbol;Acc:HGNC:11935]	platelet activation
CD40LG	HGNC Symbol	CD40 ligand [Source:HGNC Symbol;Acc:HGNC:11935]	T cell costimulation
CD40LG	HGNC Symbol	CD40 ligand [Source:HGNC Symbol;Acc:HGNC:11935]	isotype switching
CD40LG	HGNC Symbol	CD40 ligand [Source:HGNC Symbol;Acc:HGNC:11935]	B cell proliferation
CD40LG	HGNC Symbol	CD40 ligand [Source:HGNC Symbol;Acc:HGNC:11935]	leukocyte cell-cell adhesion
CD40LG	HGNC Symbol	CD40 ligand [Source:HGNC Symbol;Acc:HGNC:11935]	CD40 signaling pathway
CD40LG	HGNC Symbol	CD40 ligand [Source:HGNC Symbol;Acc:HGNC:11935]	CD40 receptor binding
CD40LG	HGNC Symbol	CD40 ligand [Source:HGNC Symbol;Acc:HGNC:11935]	activation of JUN kinase activity
CD40LG	HGNC Symbol	CD40 ligand [Source:HGNC Symbol;Acc:HGNC:11935]	B cell differentiation
CD40LG	HGNC Symbol	CD40 ligand [Source:HGNC Symbol;Acc:HGNC:11935]	immunoglobulin secretion
CD40LG	HGNC Symbol	CD40 ligand [Source:HGNC Symbol;Acc:HGNC:11935]	regulation of immunoglobulin secretion
CD40LG	HGNC Symbol	CD40 ligand [Source:HGNC Symbol;Acc:HGNC:11935]	external side of plasma membrane
CD40LG	HGNC Symbol	CD40 ligand [Source:HGNC Symbol;Acc:HGNC:11935]	signal transduction
CD74	HGNC Symbol	CD74 molecule [Source:HGNC Symbol;Acc:HGNC:1697]	integral component of membrane
CD74	HGNC Symbol	CD74 molecule [Source:HGNC Symbol;Acc:HGNC:1697]	membrane
CD74	HGNC Symbol	CD74 molecule [Source:HGNC Symbol;Acc:HGNC:1697]	immune response
CD74	HGNC Symbol	CD74 molecule [Source:HGNC Symbol;Acc:HGNC:1697]	antigen processing and presentation
CD74	HGNC Symbol	CD74 molecule [Source:HGNC Symbol;Acc:HGNC:1697]	intracellular protein transport
CD74	HGNC Symbol	CD74 molecule [Source:HGNC Symbol;Acc:HGNC:1697]	MHC class II protein binding
CD74	HGNC Symbol	CD74 molecule [Source:HGNC Symbol;Acc:HGNC:1697]	protein trimerization
CD74	HGNC Symbol	CD74 molecule [Source:HGNC Symbol;Acc:HGNC:1697]	negative regulation of cell migration
CD74	HGNC Symbol	CD74 molecule [Source:HGNC Symbol;Acc:HGNC:1697]	positive regulation of gene expression
CD74	HGNC Symbol	CD74 molecule [Source:HGNC Symbol;Acc:HGNC:1697]	positive regulation of ERK1 and ERK2 cascade
CD74	HGNC Symbol	CD74 molecule [Source:HGNC Symbol;Acc:HGNC:1697]	cytoplasm
CD74	HGNC Symbol	CD74 molecule [Source:HGNC Symbol;Acc:HGNC:1697]	plasma membrane
CD74	HGNC Symbol	CD74 molecule [Source:HGNC Symbol;Acc:HGNC:1697]	positive regulation of fibroblast proliferation
CD74	HGNC Symbol	CD74 molecule [Source:HGNC Symbol;Acc:HGNC:1697]	positive regulation of interleukin-6 production
CD74	HGNC Symbol	CD74 molecule [Source:HGNC Symbol;Acc:HGNC:1697]	nucleus
CD74	HGNC Symbol	CD74 molecule [Source:HGNC Symbol;Acc:HGNC:1697]	negative regulation of apoptotic process
CD74	HGNC Symbol	CD74 molecule [Source:HGNC Symbol;Acc:HGNC:1697]	endoplasmic reticulum
CD74	HGNC Symbol	CD74 molecule [Source:HGNC Symbol;Acc:HGNC:1697]	endoplasmic reticulum membrane
CD74	HGNC Symbol	CD74 molecule [Source:HGNC Symbol;Acc:HGNC:1697]	Golgi apparatus
CD74	HGNC Symbol	CD74 molecule [Source:HGNC Symbol;Acc:HGNC:1697]	endosome
CD74	HGNC Symbol	CD74 molecule [Source:HGNC Symbol;Acc:HGNC:1697]	late endosome
CD74	HGNC Symbol	CD74 molecule [Source:HGNC Symbol;Acc:HGNC:1697]	protein binding
CD74	HGNC Symbol	CD74 molecule [Source:HGNC Symbol;Acc:HGNC:1697]	lysosome
CD74	HGNC Symbol	CD74 molecule [Source:HGNC Symbol;Acc:HGNC:1697]	immune system process
CD74	HGNC Symbol	CD74 molecule [Source:HGNC Symbol;Acc:HGNC:1697]	adaptive immune response
CD74	HGNC Symbol	CD74 molecule [Source:HGNC Symbol;Acc:HGNC:1697]	identical protein binding
CD74	HGNC Symbol	CD74 molecule [Source:HGNC Symbol;Acc:HGNC:1697]	leukocyte migration
CD74	HGNC Symbol	CD74 molecule [Source:HGNC Symbol;Acc:HGNC:1697]	cell surface
CD74	HGNC Symbol	CD74 molecule [Source:HGNC Symbol;Acc:HGNC:1697]	prostaglandin biosynthetic process
CD74	HGNC Symbol	CD74 molecule [Source:HGNC Symbol;Acc:HGNC:1697]	extracellular exosome
CD74	HGNC Symbol	CD74 molecule [Source:HGNC Symbol;Acc:HGNC:1697]	protein stabilization
CD74	HGNC Symbol	CD74 molecule [Source:HGNC Symbol;Acc:HGNC:1697]	macrophage migration inhibitory factor binding
CD74	HGNC Symbol	CD74 molecule [Source:HGNC Symbol;Acc:HGNC:1697]	cytokine receptor activity
CD74	HGNC Symbol	CD74 molecule [Source:HGNC Symbol;Acc:HGNC:1697]	antigen processing and presentation of exogenous peptide antigen via MHC class II
CD74	HGNC Symbol	CD74 molecule [Source:HGNC Symbol;Acc:HGNC:1697]	positive regulation of peptidyl-tyrosine phosphorylation
CD74	HGNC Symbol	CD74 molecule [Source:HGNC Symbol;Acc:HGNC:1697]	trans-Golgi network membrane
CD74	HGNC Symbol	CD74 molecule [Source:HGNC Symbol;Acc:HGNC:1697]	positive regulation of interleukin-8 production
CD74	HGNC Symbol	CD74 molecule [Source:HGNC Symbol;Acc:HGNC:1697]	Golgi membrane
CD74	HGNC Symbol	CD74 molecule [Source:HGNC Symbol;Acc:HGNC:1697]	endocytic vesicle membrane
CD74	HGNC Symbol	CD74 molecule [Source:HGNC Symbol;Acc:HGNC:1697]	protein-containing complex assembly
CD74	HGNC Symbol	CD74 molecule [Source:HGNC Symbol;Acc:HGNC:1697]	lysosomal lumen
CD74	HGNC Symbol	CD74 molecule [Source:HGNC Symbol;Acc:HGNC:1697]	positive regulation of neutrophil chemotaxis
CD74	HGNC Symbol	CD74 molecule [Source:HGNC Symbol;Acc:HGNC:1697]	ER to Golgi transport vesicle membrane
CD74	HGNC Symbol	CD74 molecule [Source:HGNC Symbol;Acc:HGNC:1697]	lysosomal membrane
CD74	HGNC Symbol	CD74 molecule [Source:HGNC Symbol;Acc:HGNC:1697]	cytokine binding
CD74	HGNC Symbol	CD74 molecule [Source:HGNC Symbol;Acc:HGNC:1697]	positive regulation of transcription, DNA-templated
CD74	HGNC Symbol	CD74 molecule [Source:HGNC Symbol;Acc:HGNC:1697]	positive regulation of cytokine-mediated signaling pathway
CD74	HGNC Symbol	CD74 molecule [Source:HGNC Symbol;Acc:HGNC:1697]	positive regulation of kinase activity
CD74	HGNC Symbol	CD74 molecule [Source:HGNC Symbol;Acc:HGNC:1697]	integral component of lumenal side of endoplasmic reticulum membrane
CD74	HGNC Symbol	CD74 molecule [Source:HGNC Symbol;Acc:HGNC:1697]	regulation of macrophage activation
CD74	HGNC Symbol	CD74 molecule [Source:HGNC Symbol;Acc:HGNC:1697]	negative regulation of DNA damage response, signal transduction by p53 class mediator
CD74	HGNC Symbol	CD74 molecule [Source:HGNC Symbol;Acc:HGNC:1697]	negative regulation of intrinsic apoptotic signaling pathway in response to DNA damage by p53 class mediator
CD74	HGNC Symbol	CD74 molecule [Source:HGNC Symbol;Acc:HGNC:1697]	positive regulation of macrophage cytokine production
CD74	HGNC Symbol	CD74 molecule [Source:HGNC Symbol;Acc:HGNC:1697]	clathrin-coated endocytic vesicle membrane
CD74	HGNC Symbol	CD74 molecule [Source:HGNC Symbol;Acc:HGNC:1697]	protein-containing complex
CD74	HGNC Symbol	CD74 molecule [Source:HGNC Symbol;Acc:HGNC:1697]	amyloid-beta binding
CD74	HGNC Symbol	CD74 molecule [Source:HGNC Symbol;Acc:HGNC:1697]	positive regulation of chemokine (C-X-C motif) ligand 2 production
CD74	HGNC Symbol	CD74 molecule [Source:HGNC Symbol;Acc:HGNC:1697]	T cell activation involved in immune response
CD74	HGNC Symbol	CD74 molecule [Source:HGNC Symbol;Acc:HGNC:1697]	positive regulation of protein phosphorylation
CD74	HGNC Symbol	CD74 molecule [Source:HGNC Symbol;Acc:HGNC:1697]	positive regulation of chemokine production
CD74	HGNC Symbol	CD74 molecule [Source:HGNC Symbol;Acc:HGNC:1697]	positive regulation of prostaglandin biosynthetic process
CD74	HGNC Symbol	CD74 molecule [Source:HGNC Symbol;Acc:HGNC:1697]	positive regulation of I-kappaB kinase/NF-kappaB signaling
CD74	HGNC Symbol	CD74 molecule [Source:HGNC Symbol;Acc:HGNC:1697]	positive regulation of MAPK cascade
CD74	HGNC Symbol	CD74 molecule [Source:HGNC Symbol;Acc:HGNC:1697]	T cell selection
CD74	HGNC Symbol	CD74 molecule [Source:HGNC Symbol;Acc:HGNC:1697]	positive regulation of monocyte differentiation
CD74	HGNC Symbol	CD74 molecule [Source:HGNC Symbol;Acc:HGNC:1697]	positive regulation of viral entry into host cell
CD74	HGNC Symbol	CD74 molecule [Source:HGNC Symbol;Acc:HGNC:1697]	MHC class II protein complex binding
CD74	HGNC Symbol	CD74 molecule [Source:HGNC Symbol;Acc:HGNC:1697]	transport vesicle membrane
CD74	HGNC Symbol	CD74 molecule [Source:HGNC Symbol;Acc:HGNC:1697]	CD4 receptor binding
CD74	HGNC Symbol	CD74 molecule [Source:HGNC Symbol;Acc:HGNC:1697]	MHC class II protein complex
CD74	HGNC Symbol	CD74 molecule [Source:HGNC Symbol;Acc:HGNC:1697]	MHC class II protein binding, via antigen binding groove
CD74	HGNC Symbol	CD74 molecule [Source:HGNC Symbol;Acc:HGNC:1697]	protein folding chaperone
CD74	HGNC Symbol	CD74 molecule [Source:HGNC Symbol;Acc:HGNC:1697]	negative regulation of peptide secretion
CD74	HGNC Symbol	CD74 molecule [Source:HGNC Symbol;Acc:HGNC:1697]	positive regulation of type 2 immune response
CD74	HGNC Symbol	CD74 molecule [Source:HGNC Symbol;Acc:HGNC:1697]	immunoglobulin mediated immune response
CD74	HGNC Symbol	CD74 molecule [Source:HGNC Symbol;Acc:HGNC:1697]	antigen processing and presentation of endogenous antigen
CD74	HGNC Symbol	CD74 molecule [Source:HGNC Symbol;Acc:HGNC:1697]	positive regulation of B cell proliferation
CD74	HGNC Symbol	CD74 molecule [Source:HGNC Symbol;Acc:HGNC:1697]	positive regulation of macrophage migration inhibitory factor signaling pathway
CD74	HGNC Symbol	CD74 molecule [Source:HGNC Symbol;Acc:HGNC:1697]	vacuole
CD74	HGNC Symbol	CD74 molecule [Source:HGNC Symbol;Acc:HGNC:1697]	macrophage migration inhibitory factor receptor complex
CD74	HGNC Symbol	CD74 molecule [Source:HGNC Symbol;Acc:HGNC:1697]	nitric-oxide synthase binding
CD74	HGNC Symbol	CD74 molecule [Source:HGNC Symbol;Acc:HGNC:1697]	activation of MAPK activity
CD74	HGNC Symbol	CD74 molecule [Source:HGNC Symbol;Acc:HGNC:1697]	positive regulation of dendritic cell antigen processing and presentation
CD74	HGNC Symbol	CD74 molecule [Source:HGNC Symbol;Acc:HGNC:1697]	negative regulation of mature B cell apoptotic process
CD74	HGNC Symbol	CD74 molecule [Source:HGNC Symbol;Acc:HGNC:1697]	defense response
CD74	HGNC Symbol	CD74 molecule [Source:HGNC Symbol;Acc:HGNC:1697]	cell population proliferation
CD74	HGNC Symbol	CD74 molecule [Source:HGNC Symbol;Acc:HGNC:1697]	macrophage migration inhibitory factor signaling pathway
CD74	HGNC Symbol	CD74 molecule [Source:HGNC Symbol;Acc:HGNC:1697]	positive thymic T cell selection
CD74	HGNC Symbol	CD74 molecule [Source:HGNC Symbol;Acc:HGNC:1697]	negative thymic T cell selection
CD74	HGNC Symbol	CD74 molecule [Source:HGNC Symbol;Acc:HGNC:1697]	negative regulation of T cell differentiation
CD74	HGNC Symbol	CD74 molecule [Source:HGNC Symbol;Acc:HGNC:1697]	positive regulation of T cell differentiation
CD74	HGNC Symbol	CD74 molecule [Source:HGNC Symbol;Acc:HGNC:1697]	chaperone cofactor-dependent protein refolding
CD74	HGNC Symbol	CD74 molecule [Source:HGNC Symbol;Acc:HGNC:1697]	multivesicular body
CD74	HGNC Symbol	CD74 molecule [Source:HGNC Symbol;Acc:HGNC:1697]	external side of plasma membrane
CD74	HGNC Symbol	CD74 molecule [Source:HGNC Symbol;Acc:HGNC:1697]	NOS2-CD74 complex
CD74	HGNC Symbol	CD74 molecule [Source:HGNC Symbol;Acc:HGNC:1697]
CD79A	HGNC Symbol	CD79a molecule [Source:HGNC Symbol;Acc:HGNC:1698]	membrane
CD79A	HGNC Symbol	CD79a molecule [Source:HGNC Symbol;Acc:HGNC:1698]	cell surface receptor signaling pathway
CD79A	HGNC Symbol	CD79a molecule [Source:HGNC Symbol;Acc:HGNC:1698]	transmembrane signaling receptor activity
CD79A	HGNC Symbol	CD79a molecule [Source:HGNC Symbol;Acc:HGNC:1698]	B cell receptor signaling pathway
CD79A	HGNC Symbol	CD79a molecule [Source:HGNC Symbol;Acc:HGNC:1698]	B cell receptor complex
CD79A	HGNC Symbol	CD79a molecule [Source:HGNC Symbol;Acc:HGNC:1698]	integral component of membrane
CD79A	HGNC Symbol	CD79a molecule [Source:HGNC Symbol;Acc:HGNC:1698]	plasma membrane
CD79A	HGNC Symbol	CD79a molecule [Source:HGNC Symbol;Acc:HGNC:1698]	membrane raft
CD79A	HGNC Symbol	CD79a molecule [Source:HGNC Symbol;Acc:HGNC:1698]	protein binding
CD79A	HGNC Symbol	CD79a molecule [Source:HGNC Symbol;Acc:HGNC:1698]	immune system process
CD79A	HGNC Symbol	CD79a molecule [Source:HGNC Symbol;Acc:HGNC:1698]	adaptive immune response
CD79A	HGNC Symbol	CD79a molecule [Source:HGNC Symbol;Acc:HGNC:1698]	multivesicular body
CD79A	HGNC Symbol	CD79a molecule [Source:HGNC Symbol;Acc:HGNC:1698]	external side of plasma membrane
CD79A	HGNC Symbol	CD79a molecule [Source:HGNC Symbol;Acc:HGNC:1698]	B cell activation
CD79A	HGNC Symbol	CD79a molecule [Source:HGNC Symbol;Acc:HGNC:1698]	identical protein binding
CD79A	HGNC Symbol	CD79a molecule [Source:HGNC Symbol;Acc:HGNC:1698]	B cell proliferation
CD79A	HGNC Symbol	CD79a molecule [Source:HGNC Symbol;Acc:HGNC:1698]	B cell differentiation
CHCHD7	HGNC Symbol	coiled-coil-helix-coiled-coil-helix domain containing 7 [Source:HGNC Symbol;Acc:HGNC:28314]	mitochondrion
CHCHD7	HGNC Symbol	coiled-coil-helix-coiled-coil-helix domain containing 7 [Source:HGNC Symbol;Acc:HGNC:28314]	mitochondrial intermembrane space
CHCHD7	HGNC Symbol	coiled-coil-helix-coiled-coil-helix domain containing 7 [Source:HGNC Symbol;Acc:HGNC:28314]	molecular_function
CHCHD7	HGNC Symbol	coiled-coil-helix-coiled-coil-helix domain containing 7 [Source:HGNC Symbol;Acc:HGNC:28314]	biological_process
CHCHD7	HGNC Symbol	coiled-coil-helix-coiled-coil-helix domain containing 7 [Source:HGNC Symbol;Acc:HGNC:28314]	cellular_component
CHCHD7	HGNC Symbol	coiled-coil-helix-coiled-coil-helix domain containing 7 [Source:HGNC Symbol;Acc:HGNC:28314]
CLPTM1L	HGNC Symbol	CLPTM1 like [Source:HGNC Symbol;Acc:HGNC:24308]	integral component of membrane
CLPTM1L	HGNC Symbol	CLPTM1 like [Source:HGNC Symbol;Acc:HGNC:24308]	membrane
CLPTM1L	HGNC Symbol	CLPTM1 like [Source:HGNC Symbol;Acc:HGNC:24308]	apoptotic process
CLPTM1L	HGNC Symbol	CLPTM1 like [Source:HGNC Symbol;Acc:HGNC:24308]	protein binding
CLPTM1L	HGNC Symbol	CLPTM1 like [Source:HGNC Symbol;Acc:HGNC:24308]	endomembrane system
CLPTM1L	HGNC Symbol	CLPTM1 like [Source:HGNC Symbol;Acc:HGNC:24308]
CTSW	HGNC Symbol	cathepsin W [Source:HGNC Symbol;Acc:HGNC:2546]	proteolysis
CTSW	HGNC Symbol	cathepsin W [Source:HGNC Symbol;Acc:HGNC:2546]	cysteine-type peptidase activity
CTSW	HGNC Symbol	cathepsin W [Source:HGNC Symbol;Acc:HGNC:2546]	membrane
CTSW	HGNC Symbol	cathepsin W [Source:HGNC Symbol;Acc:HGNC:2546]	endoplasmic reticulum
CTSW	HGNC Symbol	cathepsin W [Source:HGNC Symbol;Acc:HGNC:2546]	peptidase activity
CTSW	HGNC Symbol	cathepsin W [Source:HGNC Symbol;Acc:HGNC:2546]	hydrolase activity
CTSW	HGNC Symbol	cathepsin W [Source:HGNC Symbol;Acc:HGNC:2546]	extracellular space
CTSW	HGNC Symbol	cathepsin W [Source:HGNC Symbol;Acc:HGNC:2546]	extracellular region
CTSW	HGNC Symbol	cathepsin W [Source:HGNC Symbol;Acc:HGNC:2546]	lysosome
CTSW	HGNC Symbol	cathepsin W [Source:HGNC Symbol;Acc:HGNC:2546]	cysteine-type endopeptidase activity
CTSW	HGNC Symbol	cathepsin W [Source:HGNC Symbol;Acc:HGNC:2546]	immune response
CTSW	HGNC Symbol	cathepsin W [Source:HGNC Symbol;Acc:HGNC:2546]	platelet degranulation
CTSW	HGNC Symbol	cathepsin W [Source:HGNC Symbol;Acc:HGNC:2546]	proteolysis involved in cellular protein catabolic process
CTSW	HGNC Symbol	cathepsin W [Source:HGNC Symbol;Acc:HGNC:2546]	platelet dense granule lumen
CTSW	HGNC Symbol	cathepsin W [Source:HGNC Symbol;Acc:HGNC:2546]
CYB561	HGNC Symbol	cytochrome b561 [Source:HGNC Symbol;Acc:HGNC:2571]	integral component of membrane
CYB561	HGNC Symbol	cytochrome b561 [Source:HGNC Symbol;Acc:HGNC:2571]	oxidoreductase activity
CYB561	HGNC Symbol	cytochrome b561 [Source:HGNC Symbol;Acc:HGNC:2571]	electron transport chain
CYB561	HGNC Symbol	cytochrome b561 [Source:HGNC Symbol;Acc:HGNC:2571]	ferric-chelate reductase activity
CYB561	HGNC Symbol	cytochrome b561 [Source:HGNC Symbol;Acc:HGNC:2571]	membrane
CYB561	HGNC Symbol	cytochrome b561 [Source:HGNC Symbol;Acc:HGNC:2571]	metal ion binding
CYB561	HGNC Symbol	cytochrome b561 [Source:HGNC Symbol;Acc:HGNC:2571]	oxidation-reduction process
CYB561	HGNC Symbol	cytochrome b561 [Source:HGNC Symbol;Acc:HGNC:2571]	cytoplasmic vesicle
CYB561	HGNC Symbol	cytochrome b561 [Source:HGNC Symbol;Acc:HGNC:2571]	protein binding
CYB561	HGNC Symbol	cytochrome b561 [Source:HGNC Symbol;Acc:HGNC:2571]	lysosomal membrane
CYB561	HGNC Symbol	cytochrome b561 [Source:HGNC Symbol;Acc:HGNC:2571]	transport vesicle membrane
CYB561	HGNC Symbol	cytochrome b561 [Source:HGNC Symbol;Acc:HGNC:2571]
CYP24A1	HGNC Symbol	cytochrome P450 family 24 subfamily A member 1 [Source:HGNC Symbol;Acc:HGNC:2602]	oxidation-reduction process
CYP24A1	HGNC Symbol	cytochrome P450 family 24 subfamily A member 1 [Source:HGNC Symbol;Acc:HGNC:2602]	heme binding
CYP24A1	HGNC Symbol	cytochrome P450 family 24 subfamily A member 1 [Source:HGNC Symbol;Acc:HGNC:2602]	iron ion binding
CYP24A1	HGNC Symbol	cytochrome P450 family 24 subfamily A member 1 [Source:HGNC Symbol;Acc:HGNC:2602]	oxidoreductase activity, acting on paired donors, with incorporation or reduction of molecular oxygen
CYP24A1	HGNC Symbol	cytochrome P450 family 24 subfamily A member 1 [Source:HGNC Symbol;Acc:HGNC:2602]	metal ion binding
CYP24A1	HGNC Symbol	cytochrome P450 family 24 subfamily A member 1 [Source:HGNC Symbol;Acc:HGNC:2602]	nucleoplasm
CYP24A1	HGNC Symbol	cytochrome P450 family 24 subfamily A member 1 [Source:HGNC Symbol;Acc:HGNC:2602]	plasma membrane
CYP24A1	HGNC Symbol	cytochrome P450 family 24 subfamily A member 1 [Source:HGNC Symbol;Acc:HGNC:2602]	monooxygenase activity
CYP24A1	HGNC Symbol	cytochrome P450 family 24 subfamily A member 1 [Source:HGNC Symbol;Acc:HGNC:2602]	oxidoreductase activity
CYP24A1	HGNC Symbol	cytochrome P450 family 24 subfamily A member 1 [Source:HGNC Symbol;Acc:HGNC:2602]	mitochondrion
CYP24A1	HGNC Symbol	cytochrome P450 family 24 subfamily A member 1 [Source:HGNC Symbol;Acc:HGNC:2602]	mitochondrial outer membrane
CYP24A1	HGNC Symbol	cytochrome P450 family 24 subfamily A member 1 [Source:HGNC Symbol;Acc:HGNC:2602]	vitamin metabolic process
CYP24A1	HGNC Symbol	cytochrome P450 family 24 subfamily A member 1 [Source:HGNC Symbol;Acc:HGNC:2602]	response to vitamin D
CYP24A1	HGNC Symbol	cytochrome P450 family 24 subfamily A member 1 [Source:HGNC Symbol;Acc:HGNC:2602]	vitamin D metabolic process
CYP24A1	HGNC Symbol	cytochrome P450 family 24 subfamily A member 1 [Source:HGNC Symbol;Acc:HGNC:2602]	vitamin D catabolic process
CYP24A1	HGNC Symbol	cytochrome P450 family 24 subfamily A member 1 [Source:HGNC Symbol;Acc:HGNC:2602]	osteoblast differentiation
CYP24A1	HGNC Symbol	cytochrome P450 family 24 subfamily A member 1 [Source:HGNC Symbol;Acc:HGNC:2602]	vitamin D receptor signaling pathway
CYP24A1	HGNC Symbol	cytochrome P450 family 24 subfamily A member 1 [Source:HGNC Symbol;Acc:HGNC:2602]	25-hydroxycholecalciferol-24-hydroxylase activity
CYP24A1	HGNC Symbol	cytochrome P450 family 24 subfamily A member 1 [Source:HGNC Symbol;Acc:HGNC:2602]	1-alpha,25-dihydroxyvitamin D3 24-hydroxylase activity
CYP24A1	HGNC Symbol	cytochrome P450 family 24 subfamily A member 1 [Source:HGNC Symbol;Acc:HGNC:2602]	25-hydroxycholecalciferol-23-hydroxylase activity
CYP24A1	HGNC Symbol	cytochrome P450 family 24 subfamily A member 1 [Source:HGNC Symbol;Acc:HGNC:2602]	1-alpha,25-dihydroxyvitamin D3 23-hydroxylase activity
CYP24A1	HGNC Symbol	cytochrome P450 family 24 subfamily A member 1 [Source:HGNC Symbol;Acc:HGNC:2602]	vitamin D 24-hydroxylase activity
CYP24A1	HGNC Symbol	cytochrome P450 family 24 subfamily A member 1 [Source:HGNC Symbol;Acc:HGNC:2602]	vitamin D 25-hydroxylase activity
CYP24A1	HGNC Symbol	cytochrome P450 family 24 subfamily A member 1 [Source:HGNC Symbol;Acc:HGNC:2602]	fatty acid omega-oxidation
CYP24A1	HGNC Symbol	cytochrome P450 family 24 subfamily A member 1 [Source:HGNC Symbol;Acc:HGNC:2602]
DAPL1	HGNC Symbol	death associated protein like 1 [Source:HGNC Symbol;Acc:HGNC:21490]	apoptotic process
DAPL1	HGNC Symbol	death associated protein like 1 [Source:HGNC Symbol;Acc:HGNC:21490]	cell differentiation
DAPL1	HGNC Symbol	death associated protein like 1 [Source:HGNC Symbol;Acc:HGNC:21490]	protein binding
DAPL1	HGNC Symbol	death associated protein like 1 [Source:HGNC Symbol;Acc:HGNC:21490]	death domain binding
DAPL1	HGNC Symbol	death associated protein like 1 [Source:HGNC Symbol;Acc:HGNC:21490]	negative regulation of autophagy
DAPL1	HGNC Symbol	death associated protein like 1 [Source:HGNC Symbol;Acc:HGNC:21490]	cellular response to amino acid starvation
DAPL1	HGNC Symbol	death associated protein like 1 [Source:HGNC Symbol;Acc:HGNC:21490]	apoptotic signaling pathway
DAPL1	HGNC Symbol	death associated protein like 1 [Source:HGNC Symbol;Acc:HGNC:21490]
DAPL1	HGNC Symbol	death associated protein like 1 [Source:HGNC Symbol;Acc:HGNC:21490]	G protein-coupled receptor signaling pathway
DAPL1	HGNC Symbol	death associated protein like 1 [Source:HGNC Symbol;Acc:HGNC:21490]	integral component of membrane
DAPL1	HGNC Symbol	death associated protein like 1 [Source:HGNC Symbol;Acc:HGNC:21490]	olfactory receptor activity
DAPL1	HGNC Symbol	death associated protein like 1 [Source:HGNC Symbol;Acc:HGNC:21490]	membrane
DAPL1	HGNC Symbol	death associated protein like 1 [Source:HGNC Symbol;Acc:HGNC:21490]	signal transduction
DAPL1	HGNC Symbol	death associated protein like 1 [Source:HGNC Symbol;Acc:HGNC:21490]	detection of chemical stimulus involved in sensory perception of smell
DCTPP1	HGNC Symbol	dCTP pyrophosphatase 1 [Source:HGNC Symbol;Acc:HGNC:28777]	nucleoside-triphosphate diphosphatase activity
DCTPP1	HGNC Symbol	dCTP pyrophosphatase 1 [Source:HGNC Symbol;Acc:HGNC:28777]	nucleoside triphosphate catabolic process
DCTPP1	HGNC Symbol	dCTP pyrophosphatase 1 [Source:HGNC Symbol;Acc:HGNC:28777]	nucleus
DCTPP1	HGNC Symbol	dCTP pyrophosphatase 1 [Source:HGNC Symbol;Acc:HGNC:28777]	cytoplasm
DCTPP1	HGNC Symbol	dCTP pyrophosphatase 1 [Source:HGNC Symbol;Acc:HGNC:28777]	metal ion binding
DCTPP1	HGNC Symbol	dCTP pyrophosphatase 1 [Source:HGNC Symbol;Acc:HGNC:28777]	nucleotide binding
DCTPP1	HGNC Symbol	dCTP pyrophosphatase 1 [Source:HGNC Symbol;Acc:HGNC:28777]	hydrolase activity
DCTPP1	HGNC Symbol	dCTP pyrophosphatase 1 [Source:HGNC Symbol;Acc:HGNC:28777]	mitochondrion
DCTPP1	HGNC Symbol	dCTP pyrophosphatase 1 [Source:HGNC Symbol;Acc:HGNC:28777]	cytosol
DCTPP1	HGNC Symbol	dCTP pyrophosphatase 1 [Source:HGNC Symbol;Acc:HGNC:28777]	protein binding
DCTPP1	HGNC Symbol	dCTP pyrophosphatase 1 [Source:HGNC Symbol;Acc:HGNC:28777]	magnesium ion binding
DCTPP1	HGNC Symbol	dCTP pyrophosphatase 1 [Source:HGNC Symbol;Acc:HGNC:28777]	identical protein binding
DCTPP1	HGNC Symbol	dCTP pyrophosphatase 1 [Source:HGNC Symbol;Acc:HGNC:28777]	DNA protection
DCTPP1	HGNC Symbol	dCTP pyrophosphatase 1 [Source:HGNC Symbol;Acc:HGNC:28777]	pyrophosphatase activity
DCTPP1	HGNC Symbol	dCTP pyrophosphatase 1 [Source:HGNC Symbol;Acc:HGNC:28777]	pyrimidine deoxyribonucleotide binding
DCTPP1	HGNC Symbol	dCTP pyrophosphatase 1 [Source:HGNC Symbol;Acc:HGNC:28777]	dCTP diphosphatase activity
DCTPP1	HGNC Symbol	dCTP pyrophosphatase 1 [Source:HGNC Symbol;Acc:HGNC:28777]	dCTP catabolic process
DCTPP1	HGNC Symbol	dCTP pyrophosphatase 1 [Source:HGNC Symbol;Acc:HGNC:28777]
DERL1	HGNC Symbol	derlin 1 [Source:HGNC Symbol;Acc:HGNC:28454]	membrane
DERL1	HGNC Symbol	derlin 1 [Source:HGNC Symbol;Acc:HGNC:28454]	integral component of membrane
DERL1	HGNC Symbol	derlin 1 [Source:HGNC Symbol;Acc:HGNC:28454]	protein transport
DERL1	HGNC Symbol	derlin 1 [Source:HGNC Symbol;Acc:HGNC:28454]	endoplasmic reticulum
DERL1	HGNC Symbol	derlin 1 [Source:HGNC Symbol;Acc:HGNC:28454]	endoplasmic reticulum membrane
DERL1	HGNC Symbol	derlin 1 [Source:HGNC Symbol;Acc:HGNC:28454]	protein binding
DERL1	HGNC Symbol	derlin 1 [Source:HGNC Symbol;Acc:HGNC:28454]	response to unfolded protein
DERL1	HGNC Symbol	derlin 1 [Source:HGNC Symbol;Acc:HGNC:28454]	viral process
DERL1	HGNC Symbol	derlin 1 [Source:HGNC Symbol;Acc:HGNC:28454]	integral component of endoplasmic reticulum membrane
DERL1	HGNC Symbol	derlin 1 [Source:HGNC Symbol;Acc:HGNC:28454]	cellular response to unfolded protein
DERL1	HGNC Symbol	derlin 1 [Source:HGNC Symbol;Acc:HGNC:28454]	proteasome-mediated ubiquitin-dependent protein catabolic process
DERL1	HGNC Symbol	derlin 1 [Source:HGNC Symbol;Acc:HGNC:28454]	early endosome
DERL1	HGNC Symbol	derlin 1 [Source:HGNC Symbol;Acc:HGNC:28454]	late endosome
DERL1	HGNC Symbol	derlin 1 [Source:HGNC Symbol;Acc:HGNC:28454]	endoplasmic reticulum quality control compartment
DERL1	HGNC Symbol	derlin 1 [Source:HGNC Symbol;Acc:HGNC:28454]	ubiquitin-dependent ERAD pathway
DERL1	HGNC Symbol	derlin 1 [Source:HGNC Symbol;Acc:HGNC:28454]	protein ubiquitination
DERL1	HGNC Symbol	derlin 1 [Source:HGNC Symbol;Acc:HGNC:28454]	retrograde protein transport, ER to cytosol
DERL1	HGNC Symbol	derlin 1 [Source:HGNC Symbol;Acc:HGNC:28454]	protein destabilization
DERL1	HGNC Symbol	derlin 1 [Source:HGNC Symbol;Acc:HGNC:28454]	transmembrane transport
DERL1	HGNC Symbol	derlin 1 [Source:HGNC Symbol;Acc:HGNC:28454]	signaling receptor activity
DERL1	HGNC Symbol	derlin 1 [Source:HGNC Symbol;Acc:HGNC:28454]	protein folding
DERL1	HGNC Symbol	derlin 1 [Source:HGNC Symbol;Acc:HGNC:28454]	protease binding
DERL1	HGNC Symbol	derlin 1 [Source:HGNC Symbol;Acc:HGNC:28454]	endoplasmic reticulum unfolded protein response
DERL1	HGNC Symbol	derlin 1 [Source:HGNC Symbol;Acc:HGNC:28454]	ubiquitin protein ligase binding
DERL1	HGNC Symbol	derlin 1 [Source:HGNC Symbol;Acc:HGNC:28454]	MHC class I protein binding
DERL1	HGNC Symbol	derlin 1 [Source:HGNC Symbol;Acc:HGNC:28454]	establishment of protein localization
DERL1	HGNC Symbol	derlin 1 [Source:HGNC Symbol;Acc:HGNC:28454]	ubiquitin-specific protease binding
DERL1	HGNC Symbol	derlin 1 [Source:HGNC Symbol;Acc:HGNC:28454]	positive regulation of protein binding
DERL1	HGNC Symbol	derlin 1 [Source:HGNC Symbol;Acc:HGNC:28454]	ERAD pathway
DERL1	HGNC Symbol	derlin 1 [Source:HGNC Symbol;Acc:HGNC:28454]	positive regulation of protein ubiquitination
DERL1	HGNC Symbol	derlin 1 [Source:HGNC Symbol;Acc:HGNC:28454]	misfolded protein binding
DERL1	HGNC Symbol	derlin 1 [Source:HGNC Symbol;Acc:HGNC:28454]	ATPase binding
DERL1	HGNC Symbol	derlin 1 [Source:HGNC Symbol;Acc:HGNC:28454]	ER-associated misfolded protein catabolic process
DERL1	HGNC Symbol	derlin 1 [Source:HGNC Symbol;Acc:HGNC:28454]	Derlin-1 retrotranslocation complex
DERL1	HGNC Symbol	derlin 1 [Source:HGNC Symbol;Acc:HGNC:28454]	Hrd1p ubiquitin ligase ERAD-L complex
DERL1	HGNC Symbol	derlin 1 [Source:HGNC Symbol;Acc:HGNC:28454]	signal recognition particle receptor complex
DERL1	HGNC Symbol	derlin 1 [Source:HGNC Symbol;Acc:HGNC:28454]	signal recognition particle
DERL1	HGNC Symbol	derlin 1 [Source:HGNC Symbol;Acc:HGNC:28454]	identical protein binding
DERL1	HGNC Symbol	derlin 1 [Source:HGNC Symbol;Acc:HGNC:28454]	Derlin-1-VIMP complex
DERL1	HGNC Symbol	derlin 1 [Source:HGNC Symbol;Acc:HGNC:28454]
FABP7	HGNC Symbol	fatty acid binding protein 7 [Source:HGNC Symbol;Acc:HGNC:3562]	lipid binding
FABP7	HGNC Symbol	fatty acid binding protein 7 [Source:HGNC Symbol;Acc:HGNC:3562]	cytoplasm
FABP7	HGNC Symbol	fatty acid binding protein 7 [Source:HGNC Symbol;Acc:HGNC:3562]	protein binding
FABP7	HGNC Symbol	fatty acid binding protein 7 [Source:HGNC Symbol;Acc:HGNC:3562]	cytosol
FABP7	HGNC Symbol	fatty acid binding protein 7 [Source:HGNC Symbol;Acc:HGNC:3562]	triglyceride catabolic process
FABP7	HGNC Symbol	fatty acid binding protein 7 [Source:HGNC Symbol;Acc:HGNC:3562]	nervous system development
FABP7	HGNC Symbol	fatty acid binding protein 7 [Source:HGNC Symbol;Acc:HGNC:3562]	negative regulation of cell population proliferation
FABP7	HGNC Symbol	fatty acid binding protein 7 [Source:HGNC Symbol;Acc:HGNC:3562]	startle response
FABP7	HGNC Symbol	fatty acid binding protein 7 [Source:HGNC Symbol;Acc:HGNC:3562]	cell proliferation in forebrain
FABP7	HGNC Symbol	fatty acid binding protein 7 [Source:HGNC Symbol;Acc:HGNC:3562]	neurogenesis
FABP7	HGNC Symbol	fatty acid binding protein 7 [Source:HGNC Symbol;Acc:HGNC:3562]	epithelial cell proliferation
FABP7	HGNC Symbol	fatty acid binding protein 7 [Source:HGNC Symbol;Acc:HGNC:3562]	prepulse inhibition
FABP7	HGNC Symbol	fatty acid binding protein 7 [Source:HGNC Symbol;Acc:HGNC:3562]	nucleus
FABP7	HGNC Symbol	fatty acid binding protein 7 [Source:HGNC Symbol;Acc:HGNC:3562]	cell-cell junction
FABP7	HGNC Symbol	fatty acid binding protein 7 [Source:HGNC Symbol;Acc:HGNC:3562]	cell projection
FABP7	HGNC Symbol	fatty acid binding protein 7 [Source:HGNC Symbol;Acc:HGNC:3562]	neuronal cell body
FABP7	HGNC Symbol	fatty acid binding protein 7 [Source:HGNC Symbol;Acc:HGNC:3562]	cell body
FABP7	HGNC Symbol	fatty acid binding protein 7 [Source:HGNC Symbol;Acc:HGNC:3562]	cell periphery
FAM155B	HGNC Symbol	family with sequence similarity 155 member B [Source:HGNC Symbol;Acc:HGNC:30701]	membrane
FAM155B	HGNC Symbol	family with sequence similarity 155 member B [Source:HGNC Symbol;Acc:HGNC:30701]	integral component of membrane
FAM155B	HGNC Symbol	family with sequence similarity 155 member B [Source:HGNC Symbol;Acc:HGNC:30701]	plasma membrane
FAM155B	HGNC Symbol	family with sequence similarity 155 member B [Source:HGNC Symbol;Acc:HGNC:30701]	stretch-activated, cation-selective, calcium channel activity
FAM155B	HGNC Symbol	family with sequence similarity 155 member B [Source:HGNC Symbol;Acc:HGNC:30701]	calcium ion import across plasma membrane
GTF2H5	HGNC Symbol	general transcription factor IIH subunit 5 [Source:HGNC Symbol;Acc:HGNC:21157]
GTF2H5	HGNC Symbol	general transcription factor IIH subunit 5 [Source:HGNC Symbol;Acc:HGNC:21157]	regulation of transcription, DNA-templated
GTF2H5	HGNC Symbol	general transcription factor IIH subunit 5 [Source:HGNC Symbol;Acc:HGNC:21157]	nucleotide-excision repair
GTF2H5	HGNC Symbol	general transcription factor IIH subunit 5 [Source:HGNC Symbol;Acc:HGNC:21157]	transcription factor TFIIH core complex
GTF2H5	HGNC Symbol	general transcription factor IIH subunit 5 [Source:HGNC Symbol;Acc:HGNC:21157]	nucleus
GTF2H5	HGNC Symbol	general transcription factor IIH subunit 5 [Source:HGNC Symbol;Acc:HGNC:21157]	DNA repair
GTF2H5	HGNC Symbol	general transcription factor IIH subunit 5 [Source:HGNC Symbol;Acc:HGNC:21157]	cellular response to DNA damage stimulus
GTF2H5	HGNC Symbol	general transcription factor IIH subunit 5 [Source:HGNC Symbol;Acc:HGNC:21157]	protein binding
GTF2H5	HGNC Symbol	general transcription factor IIH subunit 5 [Source:HGNC Symbol;Acc:HGNC:21157]	transcription initiation from RNA polymerase II promoter
GTF2H5	HGNC Symbol	general transcription factor IIH subunit 5 [Source:HGNC Symbol;Acc:HGNC:21157]	transcription factor TFIID complex
GTF2H5	HGNC Symbol	general transcription factor IIH subunit 5 [Source:HGNC Symbol;Acc:HGNC:21157]	nucleoplasm
GTF2H5	HGNC Symbol	general transcription factor IIH subunit 5 [Source:HGNC Symbol;Acc:HGNC:21157]	transcription by RNA polymerase II
GTF2H5	HGNC Symbol	general transcription factor IIH subunit 5 [Source:HGNC Symbol;Acc:HGNC:21157]	transcription elongation from RNA polymerase II promoter
GTF2H5	HGNC Symbol	general transcription factor IIH subunit 5 [Source:HGNC Symbol;Acc:HGNC:21157]	7-methylguanosine mRNA capping
GTF2H5	HGNC Symbol	general transcription factor IIH subunit 5 [Source:HGNC Symbol;Acc:HGNC:21157]	nucleolus
GTF2H5	HGNC Symbol	general transcription factor IIH subunit 5 [Source:HGNC Symbol;Acc:HGNC:21157]	transcription initiation from RNA polymerase I promoter
GTF2H5	HGNC Symbol	general transcription factor IIH subunit 5 [Source:HGNC Symbol;Acc:HGNC:21157]	transcription elongation from RNA polymerase I promoter
GTF2H5	HGNC Symbol	general transcription factor IIH subunit 5 [Source:HGNC Symbol;Acc:HGNC:21157]	termination of RNA polymerase I transcription
GTF2H5	HGNC Symbol	general transcription factor IIH subunit 5 [Source:HGNC Symbol;Acc:HGNC:21157]	transcription-coupled nucleotide-excision repair
GTF2H5	HGNC Symbol	general transcription factor IIH subunit 5 [Source:HGNC Symbol;Acc:HGNC:21157]	nucleotide-excision repair, preincision complex stabilization
GTF2H5	HGNC Symbol	general transcription factor IIH subunit 5 [Source:HGNC Symbol;Acc:HGNC:21157]	nucleotide-excision repair, DNA incision, 3'-to lesion
GTF2H5	HGNC Symbol	general transcription factor IIH subunit 5 [Source:HGNC Symbol;Acc:HGNC:21157]	nucleotide-excision repair, DNA incision, 5'-to lesion
GTF2H5	HGNC Symbol	general transcription factor IIH subunit 5 [Source:HGNC Symbol;Acc:HGNC:21157]	nucleotide-excision repair, DNA incision
GTF2H5	HGNC Symbol	general transcription factor IIH subunit 5 [Source:HGNC Symbol;Acc:HGNC:21157]	global genome nucleotide-excision repair
GTF2H5	HGNC Symbol	general transcription factor IIH subunit 5 [Source:HGNC Symbol;Acc:HGNC:21157]	nucleotide-excision repair, DNA duplex unwinding
GTF2H5	HGNC Symbol	general transcription factor IIH subunit 5 [Source:HGNC Symbol;Acc:HGNC:21157]	nucleotide-excision repair, preincision complex assembly
GTF2H5	HGNC Symbol	general transcription factor IIH subunit 5 [Source:HGNC Symbol;Acc:HGNC:21157]	transcription factor TFIIH holo complex
GTF2H5	HGNC Symbol	general transcription factor IIH subunit 5 [Source:HGNC Symbol;Acc:HGNC:21157]	phosphorylation of RNA polymerase II C-terminal domain
GTF2H5	HGNC Symbol	general transcription factor IIH subunit 5 [Source:HGNC Symbol;Acc:HGNC:21157]	maturation of SSU-rRNA from tricistronic rRNA transcript (SSU-rRNA, 5.8S rRNA, LSU-rRNA)
GTF2H5	HGNC Symbol	general transcription factor IIH subunit 5 [Source:HGNC Symbol;Acc:HGNC:21157]	cellular response to gamma radiation
HSPA8P1	HGNC Symbol	heat shock protein family A (Hsp70) member 8 pseudogene 1 [Source:HGNC Symbol;Acc:HGNC:5245]
HYAL4	HGNC Symbol	hyaluronidase 4 [Source:HGNC Symbol;Acc:HGNC:5323]	carbohydrate metabolic process
HYAL4	HGNC Symbol	hyaluronidase 4 [Source:HGNC Symbol;Acc:HGNC:5323]	hyalurononglucosaminidase activity
HYAL4	HGNC Symbol	hyaluronidase 4 [Source:HGNC Symbol;Acc:HGNC:5323]	metabolic process
HYAL4	HGNC Symbol	hyaluronidase 4 [Source:HGNC Symbol;Acc:HGNC:5323]	hydrolase activity, acting on glycosyl bonds
HYAL4	HGNC Symbol	hyaluronidase 4 [Source:HGNC Symbol;Acc:HGNC:5323]	membrane
HYAL4	HGNC Symbol	hyaluronidase 4 [Source:HGNC Symbol;Acc:HGNC:5323]	integral component of membrane
HYAL4	HGNC Symbol	hyaluronidase 4 [Source:HGNC Symbol;Acc:HGNC:5323]	catalytic activity
HYAL4	HGNC Symbol	hyaluronidase 4 [Source:HGNC Symbol;Acc:HGNC:5323]	hydrolase activity
HYAL4	HGNC Symbol	hyaluronidase 4 [Source:HGNC Symbol;Acc:HGNC:5323]	glycosaminoglycan catabolic process
HYAL4	HGNC Symbol	hyaluronidase 4 [Source:HGNC Symbol;Acc:HGNC:5323]	chondroitin sulfate catabolic process
HYAL4	HGNC Symbol	hyaluronidase 4 [Source:HGNC Symbol;Acc:HGNC:5323]	cell surface
IGHD	HGNC Symbol	immunoglobulin heavy constant delta [Source:HGNC Symbol;Acc:HGNC:5480]	membrane
IGHD	HGNC Symbol	immunoglobulin heavy constant delta [Source:HGNC Symbol;Acc:HGNC:5480]	integral component of membrane
IGHD	HGNC Symbol	immunoglobulin heavy constant delta [Source:HGNC Symbol;Acc:HGNC:5480]	extracellular region
IGHD	HGNC Symbol	immunoglobulin heavy constant delta [Source:HGNC Symbol;Acc:HGNC:5480]	plasma membrane
IGHD	HGNC Symbol	immunoglobulin heavy constant delta [Source:HGNC Symbol;Acc:HGNC:5480]	immune system process
IGHD	HGNC Symbol	immunoglobulin heavy constant delta [Source:HGNC Symbol;Acc:HGNC:5480]	immune response
IGHD	HGNC Symbol	immunoglobulin heavy constant delta [Source:HGNC Symbol;Acc:HGNC:5480]	adaptive immune response
IGHD	HGNC Symbol	immunoglobulin heavy constant delta [Source:HGNC Symbol;Acc:HGNC:5480]	immunoglobulin complex
IGHD	HGNC Symbol	immunoglobulin heavy constant delta [Source:HGNC Symbol;Acc:HGNC:5480]	external side of plasma membrane
IGHD	HGNC Symbol	immunoglobulin heavy constant delta [Source:HGNC Symbol;Acc:HGNC:5480]	antigen binding
IGHD	HGNC Symbol	immunoglobulin heavy constant delta [Source:HGNC Symbol;Acc:HGNC:5480]	immunoglobulin receptor binding
IGHD	HGNC Symbol	immunoglobulin heavy constant delta [Source:HGNC Symbol;Acc:HGNC:5480]	phagocytosis, recognition
IGHD	HGNC Symbol	immunoglobulin heavy constant delta [Source:HGNC Symbol;Acc:HGNC:5480]	phagocytosis, engulfment
IGHD	HGNC Symbol	immunoglobulin heavy constant delta [Source:HGNC Symbol;Acc:HGNC:5480]	complement activation, classical pathway
IGHD	HGNC Symbol	immunoglobulin heavy constant delta [Source:HGNC Symbol;Acc:HGNC:5480]	defense response to bacterium
IGHD	HGNC Symbol	immunoglobulin heavy constant delta [Source:HGNC Symbol;Acc:HGNC:5480]	innate immune response
IGHD	HGNC Symbol	immunoglobulin heavy constant delta [Source:HGNC Symbol;Acc:HGNC:5480]	B cell receptor signaling pathway
IGHD	HGNC Symbol	immunoglobulin heavy constant delta [Source:HGNC Symbol;Acc:HGNC:5480]	positive regulation of B cell activation
IGHD	HGNC Symbol	immunoglobulin heavy constant delta [Source:HGNC Symbol;Acc:HGNC:5480]	immunoglobulin complex, circulating
IGHD	HGNC Symbol	immunoglobulin heavy constant delta [Source:HGNC Symbol;Acc:HGNC:5480]	extracellular exosome
IGHD	HGNC Symbol	immunoglobulin heavy constant delta [Source:HGNC Symbol;Acc:HGNC:5480]	blood microparticle
IGHD	HGNC Symbol	immunoglobulin heavy constant delta [Source:HGNC Symbol;Acc:HGNC:5480]	positive regulation of interleukin-1 production
IVL	HGNC Symbol	involucrin [Source:HGNC Symbol;Acc:HGNC:6187]	cytoplasm
IVL	HGNC Symbol	involucrin [Source:HGNC Symbol;Acc:HGNC:6187]	keratinization
IVL	HGNC Symbol	involucrin [Source:HGNC Symbol;Acc:HGNC:6187]	cytosol
IVL	HGNC Symbol	involucrin [Source:HGNC Symbol;Acc:HGNC:6187]	centrosome
IVL	HGNC Symbol	involucrin [Source:HGNC Symbol;Acc:HGNC:6187]	protein binding
IVL	HGNC Symbol	involucrin [Source:HGNC Symbol;Acc:HGNC:6187]	nuclear body
IVL	HGNC Symbol	involucrin [Source:HGNC Symbol;Acc:HGNC:6187]	extracellular exosome
IVL	HGNC Symbol	involucrin [Source:HGNC Symbol;Acc:HGNC:6187]	keratinocyte differentiation
IVL	HGNC Symbol	involucrin [Source:HGNC Symbol;Acc:HGNC:6187]	cornification
IVL	HGNC Symbol	involucrin [Source:HGNC Symbol;Acc:HGNC:6187]	cornified envelope
IVL	HGNC Symbol	involucrin [Source:HGNC Symbol;Acc:HGNC:6187]	peptide cross-linking
IVL	HGNC Symbol	involucrin [Source:HGNC Symbol;Acc:HGNC:6187]	response to UV-B
IVL	HGNC Symbol	involucrin [Source:HGNC Symbol;Acc:HGNC:6187]	isopeptide cross-linking via N6-(L-isoglutamyl)-L-lysine
KLRB1	HGNC Symbol	killer cell lectin like receptor B1 [Source:HGNC Symbol;Acc:HGNC:6373]	membrane
KLRB1	HGNC Symbol	killer cell lectin like receptor B1 [Source:HGNC Symbol;Acc:HGNC:6373]	integral component of membrane
KLRB1	HGNC Symbol	killer cell lectin like receptor B1 [Source:HGNC Symbol;Acc:HGNC:6373]	carbohydrate binding
KLRB1	HGNC Symbol	killer cell lectin like receptor B1 [Source:HGNC Symbol;Acc:HGNC:6373]	protein binding
KLRB1	HGNC Symbol	killer cell lectin like receptor B1 [Source:HGNC Symbol;Acc:HGNC:6373]	regulation of immune response
KLRB1	HGNC Symbol	killer cell lectin like receptor B1 [Source:HGNC Symbol;Acc:HGNC:6373]	plasma membrane
KLRB1	HGNC Symbol	killer cell lectin like receptor B1 [Source:HGNC Symbol;Acc:HGNC:6373]	cell surface receptor signaling pathway
KLRB1	HGNC Symbol	killer cell lectin like receptor B1 [Source:HGNC Symbol;Acc:HGNC:6373]	transmembrane signaling receptor activity
LMAN2	HGNC Symbol	lectin, mannose binding 2 [Source:HGNC Symbol;Acc:HGNC:16986]	membrane
LMAN2	HGNC Symbol	lectin, mannose binding 2 [Source:HGNC Symbol;Acc:HGNC:16986]	integral component of membrane
LMAN2	HGNC Symbol	lectin, mannose binding 2 [Source:HGNC Symbol;Acc:HGNC:16986]	protein transport
LMAN2	HGNC Symbol	lectin, mannose binding 2 [Source:HGNC Symbol;Acc:HGNC:16986]	metal ion binding
LMAN2	HGNC Symbol	lectin, mannose binding 2 [Source:HGNC Symbol;Acc:HGNC:16986]	endoplasmic reticulum
LMAN2	HGNC Symbol	lectin, mannose binding 2 [Source:HGNC Symbol;Acc:HGNC:16986]	endoplasmic reticulum membrane
LMAN2	HGNC Symbol	lectin, mannose binding 2 [Source:HGNC Symbol;Acc:HGNC:16986]	carbohydrate binding
LMAN2	HGNC Symbol	lectin, mannose binding 2 [Source:HGNC Symbol;Acc:HGNC:16986]	Golgi apparatus
LMAN2	HGNC Symbol	lectin, mannose binding 2 [Source:HGNC Symbol;Acc:HGNC:16986]	extracellular space
LMAN2	HGNC Symbol	lectin, mannose binding 2 [Source:HGNC Symbol;Acc:HGNC:16986]	Golgi membrane
LMAN2	HGNC Symbol	lectin, mannose binding 2 [Source:HGNC Symbol;Acc:HGNC:16986]	cell surface
LMAN2	HGNC Symbol	lectin, mannose binding 2 [Source:HGNC Symbol;Acc:HGNC:16986]	endoplasmic reticulum-Golgi intermediate compartment membrane
LMAN2	HGNC Symbol	lectin, mannose binding 2 [Source:HGNC Symbol;Acc:HGNC:16986]	retrograde vesicle-mediated transport, Golgi to endoplasmic reticulum
LMAN2	HGNC Symbol	lectin, mannose binding 2 [Source:HGNC Symbol;Acc:HGNC:16986]	protein binding
LMAN2	HGNC Symbol	lectin, mannose binding 2 [Source:HGNC Symbol;Acc:HGNC:16986]	integral component of plasma membrane
LMAN2	HGNC Symbol	lectin, mannose binding 2 [Source:HGNC Symbol;Acc:HGNC:16986]	endoplasmic reticulum to Golgi vesicle-mediated transport
LMAN2	HGNC Symbol	lectin, mannose binding 2 [Source:HGNC Symbol;Acc:HGNC:16986]	positive regulation of phagocytosis
LMAN2	HGNC Symbol	lectin, mannose binding 2 [Source:HGNC Symbol;Acc:HGNC:16986]	extracellular exosome
LMAN2	HGNC Symbol	lectin, mannose binding 2 [Source:HGNC Symbol;Acc:HGNC:16986]	Golgi organization
LMAN2	HGNC Symbol	lectin, mannose binding 2 [Source:HGNC Symbol;Acc:HGNC:16986]	endoplasmic reticulum-Golgi intermediate compartment
LMAN2	HGNC Symbol	lectin, mannose binding 2 [Source:HGNC Symbol;Acc:HGNC:16986]	COPII-coated ER to Golgi transport vesicle
LMAN2	HGNC Symbol	lectin, mannose binding 2 [Source:HGNC Symbol;Acc:HGNC:16986]	endoplasmic reticulum organization
LMAN2	HGNC Symbol	lectin, mannose binding 2 [Source:HGNC Symbol;Acc:HGNC:16986]	heat shock protein binding
LMAN2	HGNC Symbol	lectin, mannose binding 2 [Source:HGNC Symbol;Acc:HGNC:16986]	mannose binding
LMAN2	HGNC Symbol	lectin, mannose binding 2 [Source:HGNC Symbol;Acc:HGNC:16986]
LRRC37A6P	HGNC Symbol	leucine rich repeat containing 37 member A6, pseudogene [Source:HGNC Symbol;Acc:HGNC:33746]
MAFA-AS1	HGNC Symbol	MAFA antisense RNA 1 [Source:HGNC Symbol;Acc:HGNC:51203]
MAPT-AS1	HGNC Symbol	MAPT antisense RNA 1 [Source:HGNC Symbol;Acc:HGNC:43738]
MAPT-IT1	HGNC Symbol	MAPT intronic transcript 1 [Source:HGNC Symbol;Acc:HGNC:43741]
MCTS1	HGNC Symbol	MCTS1 re-initiation and release factor [Source:HGNC Symbol;Acc:HGNC:23357]
MCTS1	HGNC Symbol	MCTS1 re-initiation and release factor [Source:HGNC Symbol;Acc:HGNC:23357]	RNA binding
MCTS1	HGNC Symbol	MCTS1 re-initiation and release factor [Source:HGNC Symbol;Acc:HGNC:23357]	cytoplasm
MCTS1	HGNC Symbol	MCTS1 re-initiation and release factor [Source:HGNC Symbol;Acc:HGNC:23357]	translation initiation factor activity
MCTS1	HGNC Symbol	MCTS1 re-initiation and release factor [Source:HGNC Symbol;Acc:HGNC:23357]	translation
MCTS1	HGNC Symbol	MCTS1 re-initiation and release factor [Source:HGNC Symbol;Acc:HGNC:23357]	translational initiation
MCTS1	HGNC Symbol	MCTS1 re-initiation and release factor [Source:HGNC Symbol;Acc:HGNC:23357]	cell cycle
MCTS1	HGNC Symbol	MCTS1 re-initiation and release factor [Source:HGNC Symbol;Acc:HGNC:23357]	cytosol
MCTS1	HGNC Symbol	MCTS1 re-initiation and release factor [Source:HGNC Symbol;Acc:HGNC:23357]	plasma membrane
MCTS1	HGNC Symbol	MCTS1 re-initiation and release factor [Source:HGNC Symbol;Acc:HGNC:23357]	cellular response to DNA damage stimulus
MCTS1	HGNC Symbol	MCTS1 re-initiation and release factor [Source:HGNC Symbol;Acc:HGNC:23357]	protein binding
MCTS1	HGNC Symbol	MCTS1 re-initiation and release factor [Source:HGNC Symbol;Acc:HGNC:23357]	cytosolic small ribosomal subunit
MCTS1	HGNC Symbol	MCTS1 re-initiation and release factor [Source:HGNC Symbol;Acc:HGNC:23357]	regulation of growth
MCTS1	HGNC Symbol	MCTS1 re-initiation and release factor [Source:HGNC Symbol;Acc:HGNC:23357]	ribosome disassembly
MCTS1	HGNC Symbol	MCTS1 re-initiation and release factor [Source:HGNC Symbol;Acc:HGNC:23357]	formation of translation preinitiation complex
MCTS1	HGNC Symbol	MCTS1 re-initiation and release factor [Source:HGNC Symbol;Acc:HGNC:23357]	translation reinitiation
MCTS1	HGNC Symbol	MCTS1 re-initiation and release factor [Source:HGNC Symbol;Acc:HGNC:23357]	IRES-dependent viral translational initiation
MCTS1	HGNC Symbol	MCTS1 re-initiation and release factor [Source:HGNC Symbol;Acc:HGNC:23357]	positive regulation of cell population proliferation
MORF4L2	HGNC Symbol	mortality factor 4 like 2 [Source:HGNC Symbol;Acc:HGNC:16849]	regulation of transcription, DNA-templated
MORF4L2	HGNC Symbol	mortality factor 4 like 2 [Source:HGNC Symbol;Acc:HGNC:16849]	nucleus
MORF4L2	HGNC Symbol	mortality factor 4 like 2 [Source:HGNC Symbol;Acc:HGNC:16849]	chromatin organization
MORF4L2	HGNC Symbol	mortality factor 4 like 2 [Source:HGNC Symbol;Acc:HGNC:16849]	NuA4 histone acetyltransferase complex
MORF4L2	HGNC Symbol	mortality factor 4 like 2 [Source:HGNC Symbol;Acc:HGNC:16849]	nucleoplasm
MORF4L2	HGNC Symbol	mortality factor 4 like 2 [Source:HGNC Symbol;Acc:HGNC:16849]	plasma membrane
MORF4L2	HGNC Symbol	mortality factor 4 like 2 [Source:HGNC Symbol;Acc:HGNC:16849]	nucleolus
MORF4L2	HGNC Symbol	mortality factor 4 like 2 [Source:HGNC Symbol;Acc:HGNC:16849]	DNA repair
MORF4L2	HGNC Symbol	mortality factor 4 like 2 [Source:HGNC Symbol;Acc:HGNC:16849]	cellular response to DNA damage stimulus
MORF4L2	HGNC Symbol	mortality factor 4 like 2 [Source:HGNC Symbol;Acc:HGNC:16849]	protein binding
MORF4L2	HGNC Symbol	mortality factor 4 like 2 [Source:HGNC Symbol;Acc:HGNC:16849]	regulation of growth
MORF4L2	HGNC Symbol	mortality factor 4 like 2 [Source:HGNC Symbol;Acc:HGNC:16849]	chromatin silencing
MORF4L2	HGNC Symbol	mortality factor 4 like 2 [Source:HGNC Symbol;Acc:HGNC:16849]	histone acetylation
MORF4L2	HGNC Symbol	mortality factor 4 like 2 [Source:HGNC Symbol;Acc:HGNC:16849]	histone H4 acetylation
MORF4L2	HGNC Symbol	mortality factor 4 like 2 [Source:HGNC Symbol;Acc:HGNC:16849]	histone deacetylation
MORF4L2	HGNC Symbol	mortality factor 4 like 2 [Source:HGNC Symbol;Acc:HGNC:16849]	histone acetyltransferase complex
MORF4L2	HGNC Symbol	mortality factor 4 like 2 [Source:HGNC Symbol;Acc:HGNC:16849]	histone H2A acetylation
MORF4L2	HGNC Symbol	mortality factor 4 like 2 [Source:HGNC Symbol;Acc:HGNC:16849]	positive regulation of transcription by RNA polymerase II
MORF4L2	HGNC Symbol	mortality factor 4 like 2 [Source:HGNC Symbol;Acc:HGNC:16849]	positive regulation of striated muscle cell differentiation
MORF4L2	HGNC Symbol	mortality factor 4 like 2 [Source:HGNC Symbol;Acc:HGNC:16849]
MROH7	HGNC Symbol	maestro heat like repeat family member 7 [Source:HGNC Symbol;Acc:HGNC:24802]
MROH7	HGNC Symbol	maestro heat like repeat family member 7 [Source:HGNC Symbol;Acc:HGNC:24802]	membrane
MROH7	HGNC Symbol	maestro heat like repeat family member 7 [Source:HGNC Symbol;Acc:HGNC:24802]	integral component of membrane
MROH7	HGNC Symbol	maestro heat like repeat family member 7 [Source:HGNC Symbol;Acc:HGNC:24802]	extracellular space
NANOS1	HGNC Symbol	nanos C2HC-type zinc finger 1 [Source:HGNC Symbol;Acc:HGNC:23044]	zinc ion binding
NANOS1	HGNC Symbol	nanos C2HC-type zinc finger 1 [Source:HGNC Symbol;Acc:HGNC:23044]	RNA binding
NANOS1	HGNC Symbol	nanos C2HC-type zinc finger 1 [Source:HGNC Symbol;Acc:HGNC:23044]	cytoplasm
NANOS1	HGNC Symbol	nanos C2HC-type zinc finger 1 [Source:HGNC Symbol;Acc:HGNC:23044]	metal ion binding
NANOS1	HGNC Symbol	nanos C2HC-type zinc finger 1 [Source:HGNC Symbol;Acc:HGNC:23044]	regulation of translation
NANOS1	HGNC Symbol	nanos C2HC-type zinc finger 1 [Source:HGNC Symbol;Acc:HGNC:23044]	protein binding
NANOS1	HGNC Symbol	nanos C2HC-type zinc finger 1 [Source:HGNC Symbol;Acc:HGNC:23044]	perinuclear region of cytoplasm
NANOS1	HGNC Symbol	nanos C2HC-type zinc finger 1 [Source:HGNC Symbol;Acc:HGNC:23044]	mRNA binding
NANOS1	HGNC Symbol	nanos C2HC-type zinc finger 1 [Source:HGNC Symbol;Acc:HGNC:23044]	cell migration
NANOS1	HGNC Symbol	nanos C2HC-type zinc finger 1 [Source:HGNC Symbol;Acc:HGNC:23044]	negative regulation of translation
NANOS1	HGNC Symbol	nanos C2HC-type zinc finger 1 [Source:HGNC Symbol;Acc:HGNC:23044]	oogenesis
NANOS1	HGNC Symbol	nanos C2HC-type zinc finger 1 [Source:HGNC Symbol;Acc:HGNC:23044]	translation repressor activity
NANOS1	HGNC Symbol	nanos C2HC-type zinc finger 1 [Source:HGNC Symbol;Acc:HGNC:23044]	positive regulation of nuclear-transcribed mRNA catabolic process, deadenylation-dependent decay
NANOS1	HGNC Symbol	nanos C2HC-type zinc finger 1 [Source:HGNC Symbol;Acc:HGNC:23044]	posttranscriptional regulation of gene expression
NANOS1	HGNC Symbol	nanos C2HC-type zinc finger 1 [Source:HGNC Symbol;Acc:HGNC:23044]	epithelial cell migration
NANOS1	HGNC Symbol	nanos C2HC-type zinc finger 1 [Source:HGNC Symbol;Acc:HGNC:23044]	regulation of cell growth
NANOS1	HGNC Symbol	nanos C2HC-type zinc finger 1 [Source:HGNC Symbol;Acc:HGNC:23044]	tissue homeostasis
NANOS1	HGNC Symbol	nanos C2HC-type zinc finger 1 [Source:HGNC Symbol;Acc:HGNC:23044]	cerebellar neuron development
NKAP	HGNC Symbol	NFKB activating protein [Source:HGNC Symbol;Acc:HGNC:29873]	chromatin binding
NKAP	HGNC Symbol	NFKB activating protein [Source:HGNC Symbol;Acc:HGNC:29873]	negative regulation of transcription, DNA-templated
NKAP	HGNC Symbol	NFKB activating protein [Source:HGNC Symbol;Acc:HGNC:29873]	nucleus
NKAP	HGNC Symbol	NFKB activating protein [Source:HGNC Symbol;Acc:HGNC:29873]	RNA binding
NKAP	HGNC Symbol	NFKB activating protein [Source:HGNC Symbol;Acc:HGNC:29873]	nucleoplasm
NKAP	HGNC Symbol	NFKB activating protein [Source:HGNC Symbol;Acc:HGNC:29873]	cytosol
NKAP	HGNC Symbol	NFKB activating protein [Source:HGNC Symbol;Acc:HGNC:29873]	protein binding
NKAP	HGNC Symbol	NFKB activating protein [Source:HGNC Symbol;Acc:HGNC:29873]	Notch signaling pathway
NKAP	HGNC Symbol	NFKB activating protein [Source:HGNC Symbol;Acc:HGNC:29873]	negative regulation of transcription by RNA polymerase II
NKAP	HGNC Symbol	NFKB activating protein [Source:HGNC Symbol;Acc:HGNC:29873]	regulation of gene expression
NKAP	HGNC Symbol	NFKB activating protein [Source:HGNC Symbol;Acc:HGNC:29873]	positive regulation of alpha-beta T cell differentiation
NKAP	HGNC Symbol	NFKB activating protein [Source:HGNC Symbol;Acc:HGNC:29873]	chromatin DNA binding
NKAP	HGNC Symbol	NFKB activating protein [Source:HGNC Symbol;Acc:HGNC:29873]	stem cell population maintenance
NKAP	HGNC Symbol	NFKB activating protein [Source:HGNC Symbol;Acc:HGNC:29873]	hemopoiesis
NKAP	HGNC Symbol	NFKB activating protein [Source:HGNC Symbol;Acc:HGNC:29873]	granulocyte differentiation
NKAP	HGNC Symbol	NFKB activating protein [Source:HGNC Symbol;Acc:HGNC:29873]	T cell differentiation in thymus
NKAP	HGNC Symbol	NFKB activating protein [Source:HGNC Symbol;Acc:HGNC:29873]	hematopoietic stem cell proliferation
NKAP	HGNC Symbol	NFKB activating protein [Source:HGNC Symbol;Acc:HGNC:29873]
NUP43	HGNC Symbol	nucleoporin 43 [Source:HGNC Symbol;Acc:HGNC:21182]	protein binding
NUP43	HGNC Symbol	nucleoporin 43 [Source:HGNC Symbol;Acc:HGNC:21182]	nucleus
NUP43	HGNC Symbol	nucleoporin 43 [Source:HGNC Symbol;Acc:HGNC:21182]	mRNA transport
NUP43	HGNC Symbol	nucleoporin 43 [Source:HGNC Symbol;Acc:HGNC:21182]	protein transport
NUP43	HGNC Symbol	nucleoporin 43 [Source:HGNC Symbol;Acc:HGNC:21182]	cell cycle
NUP43	HGNC Symbol	nucleoporin 43 [Source:HGNC Symbol;Acc:HGNC:21182]	cell division
NUP43	HGNC Symbol	nucleoporin 43 [Source:HGNC Symbol;Acc:HGNC:21182]	chromosome
NUP43	HGNC Symbol	nucleoporin 43 [Source:HGNC Symbol;Acc:HGNC:21182]	nuclear pore
NUP43	HGNC Symbol	nucleoporin 43 [Source:HGNC Symbol;Acc:HGNC:21182]	chromosome segregation
NUP43	HGNC Symbol	nucleoporin 43 [Source:HGNC Symbol;Acc:HGNC:21182]	chromosome, centromeric region
NUP43	HGNC Symbol	nucleoporin 43 [Source:HGNC Symbol;Acc:HGNC:21182]	kinetochore
NUP43	HGNC Symbol	nucleoporin 43 [Source:HGNC Symbol;Acc:HGNC:21182]	condensed chromosome kinetochore
NUP43	HGNC Symbol	nucleoporin 43 [Source:HGNC Symbol;Acc:HGNC:21182]	cytosol
NUP43	HGNC Symbol	nucleoporin 43 [Source:HGNC Symbol;Acc:HGNC:21182]	intracellular transport of virus
NUP43	HGNC Symbol	nucleoporin 43 [Source:HGNC Symbol;Acc:HGNC:21182]	host cell
NUP43	HGNC Symbol	nucleoporin 43 [Source:HGNC Symbol;Acc:HGNC:21182]	regulation of glycolytic process
NUP43	HGNC Symbol	nucleoporin 43 [Source:HGNC Symbol;Acc:HGNC:21182]	mRNA export from nucleus
NUP43	HGNC Symbol	nucleoporin 43 [Source:HGNC Symbol;Acc:HGNC:21182]	tRNA export from nucleus
NUP43	HGNC Symbol	nucleoporin 43 [Source:HGNC Symbol;Acc:HGNC:21182]	viral process
NUP43	HGNC Symbol	nucleoporin 43 [Source:HGNC Symbol;Acc:HGNC:21182]	protein sumoylation
NUP43	HGNC Symbol	nucleoporin 43 [Source:HGNC Symbol;Acc:HGNC:21182]	viral transcription
NUP43	HGNC Symbol	nucleoporin 43 [Source:HGNC Symbol;Acc:HGNC:21182]	regulation of gene silencing by miRNA
NUP43	HGNC Symbol	nucleoporin 43 [Source:HGNC Symbol;Acc:HGNC:21182]	regulation of cellular response to heat
NUP43	HGNC Symbol	nucleoporin 43 [Source:HGNC Symbol;Acc:HGNC:21182]	nuclear envelope
NUP43	HGNC Symbol	nucleoporin 43 [Source:HGNC Symbol;Acc:HGNC:21182]	nuclear pore outer ring
NUP43	HGNC Symbol	nucleoporin 43 [Source:HGNC Symbol;Acc:HGNC:21182]
OR51E2	HGNC Symbol	olfactory receptor family 51 subfamily E member 2 [Source:HGNC Symbol;Acc:HGNC:15195]	G protein-coupled receptor signaling pathway
OR51E2	HGNC Symbol	olfactory receptor family 51 subfamily E member 2 [Source:HGNC Symbol;Acc:HGNC:15195]	integral component of membrane
OR51E2	HGNC Symbol	olfactory receptor family 51 subfamily E member 2 [Source:HGNC Symbol;Acc:HGNC:15195]	G protein-coupled receptor activity
OR51E2	HGNC Symbol	olfactory receptor family 51 subfamily E member 2 [Source:HGNC Symbol;Acc:HGNC:15195]	olfactory receptor activity
OR51E2	HGNC Symbol	olfactory receptor family 51 subfamily E member 2 [Source:HGNC Symbol;Acc:HGNC:15195]	membrane
OR51E2	HGNC Symbol	olfactory receptor family 51 subfamily E member 2 [Source:HGNC Symbol;Acc:HGNC:15195]	plasma membrane
OR51E2	HGNC Symbol	olfactory receptor family 51 subfamily E member 2 [Source:HGNC Symbol;Acc:HGNC:15195]	endosome
OR51E2	HGNC Symbol	olfactory receptor family 51 subfamily E member 2 [Source:HGNC Symbol;Acc:HGNC:15195]	signal transduction
OR51E2	HGNC Symbol	olfactory receptor family 51 subfamily E member 2 [Source:HGNC Symbol;Acc:HGNC:15195]	early endosome membrane
OR51E2	HGNC Symbol	olfactory receptor family 51 subfamily E member 2 [Source:HGNC Symbol;Acc:HGNC:15195]	sensory perception of smell
OR51E2	HGNC Symbol	olfactory receptor family 51 subfamily E member 2 [Source:HGNC Symbol;Acc:HGNC:15195]	response to stimulus
OR51E2	HGNC Symbol	olfactory receptor family 51 subfamily E member 2 [Source:HGNC Symbol;Acc:HGNC:15195]	detection of chemical stimulus involved in sensory perception of smell
OR51E2	HGNC Symbol	olfactory receptor family 51 subfamily E member 2 [Source:HGNC Symbol;Acc:HGNC:15195]	cell migration
OR51E2	HGNC Symbol	olfactory receptor family 51 subfamily E member 2 [Source:HGNC Symbol;Acc:HGNC:15195]	signaling receptor activity
OR51E2	HGNC Symbol	olfactory receptor family 51 subfamily E member 2 [Source:HGNC Symbol;Acc:HGNC:15195]	cellular response to fatty acid
OR51E2	HGNC Symbol	olfactory receptor family 51 subfamily E member 2 [Source:HGNC Symbol;Acc:HGNC:15195]	melanocyte differentiation
OR51E2	HGNC Symbol	olfactory receptor family 51 subfamily E member 2 [Source:HGNC Symbol;Acc:HGNC:15195]	steroid hormone receptor activity
OR51E2	HGNC Symbol	olfactory receptor family 51 subfamily E member 2 [Source:HGNC Symbol;Acc:HGNC:15195]	steroid hormone mediated signaling pathway
OR51E2	HGNC Symbol	olfactory receptor family 51 subfamily E member 2 [Source:HGNC Symbol;Acc:HGNC:15195]	positive regulation of cAMP-mediated signaling
OR51E2	HGNC Symbol	olfactory receptor family 51 subfamily E member 2 [Source:HGNC Symbol;Acc:HGNC:15195]	positive regulation of renin secretion into blood stream
OR51E2	HGNC Symbol	olfactory receptor family 51 subfamily E member 2 [Source:HGNC Symbol;Acc:HGNC:15195]	positive regulation of blood pressure
OR51E2	HGNC Symbol	olfactory receptor family 51 subfamily E member 2 [Source:HGNC Symbol;Acc:HGNC:15195]	melanocyte proliferation
OR51E2	HGNC Symbol	olfactory receptor family 51 subfamily E member 2 [Source:HGNC Symbol;Acc:HGNC:15195]	intracellular organelle
PAX7	HGNC Symbol	paired box 7 [Source:HGNC Symbol;Acc:HGNC:8621]	DNA binding
PAX7	HGNC Symbol	paired box 7 [Source:HGNC Symbol;Acc:HGNC:8621]	regulation of transcription, DNA-templated
PAX7	HGNC Symbol	paired box 7 [Source:HGNC Symbol;Acc:HGNC:8621]	sequence-specific DNA binding
PAX7	HGNC Symbol	paired box 7 [Source:HGNC Symbol;Acc:HGNC:8621]	nucleus
PAX7	HGNC Symbol	paired box 7 [Source:HGNC Symbol;Acc:HGNC:8621]	multicellular organism development
PAX7	HGNC Symbol	paired box 7 [Source:HGNC Symbol;Acc:HGNC:8621]	muscle organ development
PAX7	HGNC Symbol	paired box 7 [Source:HGNC Symbol;Acc:HGNC:8621]	DNA-binding transcription factor activity, RNA polymerase II-specific
PAX7	HGNC Symbol	paired box 7 [Source:HGNC Symbol;Acc:HGNC:8621]	regulation of transcription by RNA polymerase II
PAX7	HGNC Symbol	paired box 7 [Source:HGNC Symbol;Acc:HGNC:8621]	nuclear chromatin
PAX7	HGNC Symbol	paired box 7 [Source:HGNC Symbol;Acc:HGNC:8621]	RNA polymerase II cis-regulatory region sequence-specific DNA binding
PAX7	HGNC Symbol	paired box 7 [Source:HGNC Symbol;Acc:HGNC:8621]	sequence-specific double-stranded DNA binding
PAX7	HGNC Symbol	paired box 7 [Source:HGNC Symbol;Acc:HGNC:8621]	anatomical structure development
PAX7	HGNC Symbol	paired box 7 [Source:HGNC Symbol;Acc:HGNC:8621]	negative regulation of apoptotic process
PAX7	HGNC Symbol	paired box 7 [Source:HGNC Symbol;Acc:HGNC:8621]	anatomical structure morphogenesis
PAX7	HGNC Symbol	paired box 7 [Source:HGNC Symbol;Acc:HGNC:8621]	DNA-binding transcription factor activity
PAX7	HGNC Symbol	paired box 7 [Source:HGNC Symbol;Acc:HGNC:8621]	chromatin remodeling
PAX7	HGNC Symbol	paired box 7 [Source:HGNC Symbol;Acc:HGNC:8621]	skeletal muscle tissue development
PAX7	HGNC Symbol	paired box 7 [Source:HGNC Symbol;Acc:HGNC:8621]	regulation of cell fate commitment
PAX7	HGNC Symbol	paired box 7 [Source:HGNC Symbol;Acc:HGNC:8621]	regulation of gene expression
PAX7	HGNC Symbol	paired box 7 [Source:HGNC Symbol;Acc:HGNC:8621]	skeletal muscle satellite cell commitment
PAX7	HGNC Symbol	paired box 7 [Source:HGNC Symbol;Acc:HGNC:8621]	spinal cord association neuron differentiation
PAX7	HGNC Symbol	paired box 7 [Source:HGNC Symbol;Acc:HGNC:8621]	dorsal/ventral neural tube patterning
PAX7	HGNC Symbol	paired box 7 [Source:HGNC Symbol;Acc:HGNC:8621]	positive regulation of histone methylation
PAX7	HGNC Symbol	paired box 7 [Source:HGNC Symbol;Acc:HGNC:8621]	skeletal muscle tissue regeneration
PAX7	HGNC Symbol	paired box 7 [Source:HGNC Symbol;Acc:HGNC:8621]	positive regulation of transcription by RNA polymerase II
PAX7	HGNC Symbol	paired box 7 [Source:HGNC Symbol;Acc:HGNC:8621]	neuron fate commitment
PAX7	HGNC Symbol	paired box 7 [Source:HGNC Symbol;Acc:HGNC:8621]	embryonic skeletal system development
PAX7	HGNC Symbol	paired box 7 [Source:HGNC Symbol;Acc:HGNC:8621]	regulation of DNA binding
PAX7	HGNC Symbol	paired box 7 [Source:HGNC Symbol;Acc:HGNC:8621]	cartilage development
PAX7	HGNC Symbol	paired box 7 [Source:HGNC Symbol;Acc:HGNC:8621]	muscle tissue morphogenesis
PAX7	HGNC Symbol	paired box 7 [Source:HGNC Symbol;Acc:HGNC:8621]	positive regulation of myoblast proliferation
PAX7	HGNC Symbol	paired box 7 [Source:HGNC Symbol;Acc:HGNC:8621]	protein binding
PCMT1	HGNC Symbol	protein-L-isoaspartate (D-aspartate) O-methyltransferase [Source:HGNC Symbol;Acc:HGNC:8728]	cellular protein modification process
PCMT1	HGNC Symbol	protein-L-isoaspartate (D-aspartate) O-methyltransferase [Source:HGNC Symbol;Acc:HGNC:8728]	protein-L-isoaspartate (D-aspartate) O-methyltransferase activity
PCMT1	HGNC Symbol	protein-L-isoaspartate (D-aspartate) O-methyltransferase [Source:HGNC Symbol;Acc:HGNC:8728]	cytoplasm
PCMT1	HGNC Symbol	protein-L-isoaspartate (D-aspartate) O-methyltransferase [Source:HGNC Symbol;Acc:HGNC:8728]	transferase activity
PCMT1	HGNC Symbol	protein-L-isoaspartate (D-aspartate) O-methyltransferase [Source:HGNC Symbol;Acc:HGNC:8728]	cytosol
PCMT1	HGNC Symbol	protein-L-isoaspartate (D-aspartate) O-methyltransferase [Source:HGNC Symbol;Acc:HGNC:8728]	methyltransferase activity
PCMT1	HGNC Symbol	protein-L-isoaspartate (D-aspartate) O-methyltransferase [Source:HGNC Symbol;Acc:HGNC:8728]	methylation
PCMT1	HGNC Symbol	protein-L-isoaspartate (D-aspartate) O-methyltransferase [Source:HGNC Symbol;Acc:HGNC:8728]	protein binding
PCMT1	HGNC Symbol	protein-L-isoaspartate (D-aspartate) O-methyltransferase [Source:HGNC Symbol;Acc:HGNC:8728]	cadherin binding
PCMT1	HGNC Symbol	protein-L-isoaspartate (D-aspartate) O-methyltransferase [Source:HGNC Symbol;Acc:HGNC:8728]	extracellular exosome
PCMT1	HGNC Symbol	protein-L-isoaspartate (D-aspartate) O-methyltransferase [Source:HGNC Symbol;Acc:HGNC:8728]	extracellular vesicle
PCMT1	HGNC Symbol	protein-L-isoaspartate (D-aspartate) O-methyltransferase [Source:HGNC Symbol;Acc:HGNC:8728]	protein methylation
PCMT1	HGNC Symbol	protein-L-isoaspartate (D-aspartate) O-methyltransferase [Source:HGNC Symbol;Acc:HGNC:8728]	protein repair
PCMT1	HGNC Symbol	protein-L-isoaspartate (D-aspartate) O-methyltransferase [Source:HGNC Symbol;Acc:HGNC:8728]
PDP1	HGNC Symbol	pyruvate dehyrogenase phosphatase catalytic subunit 1 [Source:HGNC Symbol;Acc:HGNC:9279]
PDP1	HGNC Symbol	pyruvate dehyrogenase phosphatase catalytic subunit 1 [Source:HGNC Symbol;Acc:HGNC:9279]	catalytic activity
PDP1	HGNC Symbol	pyruvate dehyrogenase phosphatase catalytic subunit 1 [Source:HGNC Symbol;Acc:HGNC:9279]	cation binding
PDP1	HGNC Symbol	pyruvate dehyrogenase phosphatase catalytic subunit 1 [Source:HGNC Symbol;Acc:HGNC:9279]	protein dephosphorylation
PDP1	HGNC Symbol	pyruvate dehyrogenase phosphatase catalytic subunit 1 [Source:HGNC Symbol;Acc:HGNC:9279]	protein serine/threonine phosphatase activity
PDP1	HGNC Symbol	pyruvate dehyrogenase phosphatase catalytic subunit 1 [Source:HGNC Symbol;Acc:HGNC:9279]	metal ion binding
PDP1	HGNC Symbol	pyruvate dehyrogenase phosphatase catalytic subunit 1 [Source:HGNC Symbol;Acc:HGNC:9279]	hydrolase activity
PDP1	HGNC Symbol	pyruvate dehyrogenase phosphatase catalytic subunit 1 [Source:HGNC Symbol;Acc:HGNC:9279]	mitochondrion
PDP1	HGNC Symbol	pyruvate dehyrogenase phosphatase catalytic subunit 1 [Source:HGNC Symbol;Acc:HGNC:9279]	mitochondrial matrix
PDP1	HGNC Symbol	pyruvate dehyrogenase phosphatase catalytic subunit 1 [Source:HGNC Symbol;Acc:HGNC:9279]	phosphoprotein phosphatase activity
PDP1	HGNC Symbol	pyruvate dehyrogenase phosphatase catalytic subunit 1 [Source:HGNC Symbol;Acc:HGNC:9279]	protein binding
PDP1	HGNC Symbol	pyruvate dehyrogenase phosphatase catalytic subunit 1 [Source:HGNC Symbol;Acc:HGNC:9279]	phosphatase activity
PDP1	HGNC Symbol	pyruvate dehyrogenase phosphatase catalytic subunit 1 [Source:HGNC Symbol;Acc:HGNC:9279]	magnesium-dependent protein serine/threonine phosphatase activity
PDP1	HGNC Symbol	pyruvate dehyrogenase phosphatase catalytic subunit 1 [Source:HGNC Symbol;Acc:HGNC:9279]	peptidyl-threonine dephosphorylation
PDP1	HGNC Symbol	pyruvate dehyrogenase phosphatase catalytic subunit 1 [Source:HGNC Symbol;Acc:HGNC:9279]	regulation of acetyl-CoA biosynthetic process from pyruvate
PDP1	HGNC Symbol	pyruvate dehyrogenase phosphatase catalytic subunit 1 [Source:HGNC Symbol;Acc:HGNC:9279]	[pyruvate dehydrogenase (lipoamide)] phosphatase activity
PDP1	HGNC Symbol	pyruvate dehyrogenase phosphatase catalytic subunit 1 [Source:HGNC Symbol;Acc:HGNC:9279]	positive regulation of pyruvate dehydrogenase activity
PGK1	HGNC Symbol	phosphoglycerate kinase 1 [Source:HGNC Symbol;Acc:HGNC:8896]	glycolytic process
PGK1	HGNC Symbol	phosphoglycerate kinase 1 [Source:HGNC Symbol;Acc:HGNC:8896]	phosphoglycerate kinase activity
PGK1	HGNC Symbol	phosphoglycerate kinase 1 [Source:HGNC Symbol;Acc:HGNC:8896]	cytoplasm
PGK1	HGNC Symbol	phosphoglycerate kinase 1 [Source:HGNC Symbol;Acc:HGNC:8896]	membrane
PGK1	HGNC Symbol	phosphoglycerate kinase 1 [Source:HGNC Symbol;Acc:HGNC:8896]	nucleotide binding
PGK1	HGNC Symbol	phosphoglycerate kinase 1 [Source:HGNC Symbol;Acc:HGNC:8896]	ATP binding
PGK1	HGNC Symbol	phosphoglycerate kinase 1 [Source:HGNC Symbol;Acc:HGNC:8896]	kinase activity
PGK1	HGNC Symbol	phosphoglycerate kinase 1 [Source:HGNC Symbol;Acc:HGNC:8896]	transferase activity
PGK1	HGNC Symbol	phosphoglycerate kinase 1 [Source:HGNC Symbol;Acc:HGNC:8896]	phosphorylation
PGK1	HGNC Symbol	phosphoglycerate kinase 1 [Source:HGNC Symbol;Acc:HGNC:8896]	membrane raft
PGK1	HGNC Symbol	phosphoglycerate kinase 1 [Source:HGNC Symbol;Acc:HGNC:8896]	protein binding
PGK1	HGNC Symbol	phosphoglycerate kinase 1 [Source:HGNC Symbol;Acc:HGNC:8896]	cytosol
PGK1	HGNC Symbol	phosphoglycerate kinase 1 [Source:HGNC Symbol;Acc:HGNC:8896]	extracellular exosome
PGK1	HGNC Symbol	phosphoglycerate kinase 1 [Source:HGNC Symbol;Acc:HGNC:8896]	epithelial cell differentiation
PGK1	HGNC Symbol	phosphoglycerate kinase 1 [Source:HGNC Symbol;Acc:HGNC:8896]	gluconeogenesis
PGK1	HGNC Symbol	phosphoglycerate kinase 1 [Source:HGNC Symbol;Acc:HGNC:8896]	canonical glycolysis
PGK1	HGNC Symbol	phosphoglycerate kinase 1 [Source:HGNC Symbol;Acc:HGNC:8896]	ADP binding
PGK1	HGNC Symbol	phosphoglycerate kinase 1 [Source:HGNC Symbol;Acc:HGNC:8896]	protein-disulfide reductase activity
PGK1	HGNC Symbol	phosphoglycerate kinase 1 [Source:HGNC Symbol;Acc:HGNC:8896]	negative regulation of angiogenesis
PGK1	HGNC Symbol	phosphoglycerate kinase 1 [Source:HGNC Symbol;Acc:HGNC:8896]	plasminogen activation
PGK1	HGNC Symbol	phosphoglycerate kinase 1 [Source:HGNC Symbol;Acc:HGNC:8896]	cellular response to hypoxia
PGK1	HGNC Symbol	phosphoglycerate kinase 1 [Source:HGNC Symbol;Acc:HGNC:8896]	positive regulation of oxidative phosphorylation
PGK1	HGNC Symbol	phosphoglycerate kinase 1 [Source:HGNC Symbol;Acc:HGNC:8896]	extracellular space
PGK1	HGNC Symbol	phosphoglycerate kinase 1 [Source:HGNC Symbol;Acc:HGNC:8896]
PITRM1	HGNC Symbol	pitrilysin metallopeptidase 1 [Source:HGNC Symbol;Acc:HGNC:17663]
PITRM1	HGNC Symbol	pitrilysin metallopeptidase 1 [Source:HGNC Symbol;Acc:HGNC:17663]	metal ion binding
PITRM1	HGNC Symbol	pitrilysin metallopeptidase 1 [Source:HGNC Symbol;Acc:HGNC:17663]	proteolysis
PITRM1	HGNC Symbol	pitrilysin metallopeptidase 1 [Source:HGNC Symbol;Acc:HGNC:17663]	catalytic activity
PITRM1	HGNC Symbol	pitrilysin metallopeptidase 1 [Source:HGNC Symbol;Acc:HGNC:17663]	peptidase activity
PITRM1	HGNC Symbol	pitrilysin metallopeptidase 1 [Source:HGNC Symbol;Acc:HGNC:17663]	hydrolase activity
PITRM1	HGNC Symbol	pitrilysin metallopeptidase 1 [Source:HGNC Symbol;Acc:HGNC:17663]	mitochondrion
PITRM1	HGNC Symbol	pitrilysin metallopeptidase 1 [Source:HGNC Symbol;Acc:HGNC:17663]	zinc ion binding
PITRM1	HGNC Symbol	pitrilysin metallopeptidase 1 [Source:HGNC Symbol;Acc:HGNC:17663]	mitochondrial matrix
PITRM1	HGNC Symbol	pitrilysin metallopeptidase 1 [Source:HGNC Symbol;Acc:HGNC:17663]	positive regulation of catalytic activity
PITRM1	HGNC Symbol	pitrilysin metallopeptidase 1 [Source:HGNC Symbol;Acc:HGNC:17663]	protein binding
PITRM1	HGNC Symbol	pitrilysin metallopeptidase 1 [Source:HGNC Symbol;Acc:HGNC:17663]	metalloendopeptidase activity
PITRM1	HGNC Symbol	pitrilysin metallopeptidase 1 [Source:HGNC Symbol;Acc:HGNC:17663]	metallopeptidase activity
PITRM1	HGNC Symbol	pitrilysin metallopeptidase 1 [Source:HGNC Symbol;Acc:HGNC:17663]	enzyme activator activity
PITRM1	HGNC Symbol	pitrilysin metallopeptidase 1 [Source:HGNC Symbol;Acc:HGNC:17663]	protein processing
PITRM1	HGNC Symbol	pitrilysin metallopeptidase 1 [Source:HGNC Symbol;Acc:HGNC:17663]	protein targeting to mitochondrion
PROM2	HGNC Symbol	prominin 2 [Source:HGNC Symbol;Acc:HGNC:20685]	integral component of membrane
PROM2	HGNC Symbol	prominin 2 [Source:HGNC Symbol;Acc:HGNC:20685]	membrane
PROM2	HGNC Symbol	prominin 2 [Source:HGNC Symbol;Acc:HGNC:20685]	plasma membrane
PROM2	HGNC Symbol	prominin 2 [Source:HGNC Symbol;Acc:HGNC:20685]	cilium
PROM2	HGNC Symbol	prominin 2 [Source:HGNC Symbol;Acc:HGNC:20685]	cytoplasmic vesicle
PROM2	HGNC Symbol	prominin 2 [Source:HGNC Symbol;Acc:HGNC:20685]	apical plasma membrane
PROM2	HGNC Symbol	prominin 2 [Source:HGNC Symbol;Acc:HGNC:20685]	membrane raft
PROM2	HGNC Symbol	prominin 2 [Source:HGNC Symbol;Acc:HGNC:20685]	cell projection
PROM2	HGNC Symbol	prominin 2 [Source:HGNC Symbol;Acc:HGNC:20685]	protein binding
PROM2	HGNC Symbol	prominin 2 [Source:HGNC Symbol;Acc:HGNC:20685]	cell surface
PROM2	HGNC Symbol	prominin 2 [Source:HGNC Symbol;Acc:HGNC:20685]	basolateral plasma membrane
PROM2	HGNC Symbol	prominin 2 [Source:HGNC Symbol;Acc:HGNC:20685]	ciliary membrane
PROM2	HGNC Symbol	prominin 2 [Source:HGNC Symbol;Acc:HGNC:20685]	integral component of plasma membrane
PROM2	HGNC Symbol	prominin 2 [Source:HGNC Symbol;Acc:HGNC:20685]	microvillus
PROM2	HGNC Symbol	prominin 2 [Source:HGNC Symbol;Acc:HGNC:20685]	microvillus membrane
PROM2	HGNC Symbol	prominin 2 [Source:HGNC Symbol;Acc:HGNC:20685]	extracellular exosome
PROM2	HGNC Symbol	prominin 2 [Source:HGNC Symbol;Acc:HGNC:20685]	positive regulation of protein phosphorylation
PROM2	HGNC Symbol	prominin 2 [Source:HGNC Symbol;Acc:HGNC:20685]	regulation of GTPase activity
PROM2	HGNC Symbol	prominin 2 [Source:HGNC Symbol;Acc:HGNC:20685]	cholesterol binding
PROM2	HGNC Symbol	prominin 2 [Source:HGNC Symbol;Acc:HGNC:20685]	prominosome
PROM2	HGNC Symbol	prominin 2 [Source:HGNC Symbol;Acc:HGNC:20685]	microspike
PROM2	HGNC Symbol	prominin 2 [Source:HGNC Symbol;Acc:HGNC:20685]	negative regulation of pinocytosis
PROM2	HGNC Symbol	prominin 2 [Source:HGNC Symbol;Acc:HGNC:20685]	negative regulation of caveolin-mediated endocytosis
PROM2	HGNC Symbol	prominin 2 [Source:HGNC Symbol;Acc:HGNC:20685]	positive regulation of cell projection organization
PROM2	HGNC Symbol	prominin 2 [Source:HGNC Symbol;Acc:HGNC:20685]
PRR13P5	HGNC Symbol	proline rich 13 pseudogene 5 [Source:HGNC Symbol;Acc:HGNC:50618]
PRSS1	HGNC Symbol	serine protease 1 [Source:HGNC Symbol;Acc:HGNC:9475]	proteolysis
PRSS1	HGNC Symbol	serine protease 1 [Source:HGNC Symbol;Acc:HGNC:9475]	serine-type endopeptidase activity
PRSS1	HGNC Symbol	serine protease 1 [Source:HGNC Symbol;Acc:HGNC:9475]	peptidase activity
PRSS1	HGNC Symbol	serine protease 1 [Source:HGNC Symbol;Acc:HGNC:9475]	hydrolase activity
PRSS1	HGNC Symbol	serine protease 1 [Source:HGNC Symbol;Acc:HGNC:9475]	serine-type peptidase activity
PRSS1	HGNC Symbol	serine protease 1 [Source:HGNC Symbol;Acc:HGNC:9475]
PRSS1	HGNC Symbol	serine protease 1 [Source:HGNC Symbol;Acc:HGNC:9475]	metal ion binding
PRSS1	HGNC Symbol	serine protease 1 [Source:HGNC Symbol;Acc:HGNC:9475]	extracellular region
PRSS1	HGNC Symbol	serine protease 1 [Source:HGNC Symbol;Acc:HGNC:9475]	extracellular space
PRSS1	HGNC Symbol	serine protease 1 [Source:HGNC Symbol;Acc:HGNC:9475]	digestion
PRSS1	HGNC Symbol	serine protease 1 [Source:HGNC Symbol;Acc:HGNC:9475]	blood microparticle
PRSS1	HGNC Symbol	serine protease 1 [Source:HGNC Symbol;Acc:HGNC:9475]	collagen-containing extracellular matrix
PRSS1	HGNC Symbol	serine protease 1 [Source:HGNC Symbol;Acc:HGNC:9475]	extracellular matrix disassembly
PRSS1	HGNC Symbol	serine protease 1 [Source:HGNC Symbol;Acc:HGNC:9475]	cobalamin metabolic process
PVR	HGNC Symbol	PVR cell adhesion molecule [Source:HGNC Symbol;Acc:HGNC:9705]	membrane
PVR	HGNC Symbol	PVR cell adhesion molecule [Source:HGNC Symbol;Acc:HGNC:9705]	integral component of membrane
PVR	HGNC Symbol	PVR cell adhesion molecule [Source:HGNC Symbol;Acc:HGNC:9705]	plasma membrane
PVR	HGNC Symbol	PVR cell adhesion molecule [Source:HGNC Symbol;Acc:HGNC:9705]	cell adhesion
PVR	HGNC Symbol	PVR cell adhesion molecule [Source:HGNC Symbol;Acc:HGNC:9705]	extracellular region
PVR	HGNC Symbol	PVR cell adhesion molecule [Source:HGNC Symbol;Acc:HGNC:9705]	focal adhesion
PVR	HGNC Symbol	PVR cell adhesion molecule [Source:HGNC Symbol;Acc:HGNC:9705]	protein binding
PVR	HGNC Symbol	PVR cell adhesion molecule [Source:HGNC Symbol;Acc:HGNC:9705]	viral process
PVR	HGNC Symbol	PVR cell adhesion molecule [Source:HGNC Symbol;Acc:HGNC:9705]	viral entry into host cell
PVR	HGNC Symbol	PVR cell adhesion molecule [Source:HGNC Symbol;Acc:HGNC:9705]	regulation of immune response
PVR	HGNC Symbol	PVR cell adhesion molecule [Source:HGNC Symbol;Acc:HGNC:9705]	adherens junction
PVR	HGNC Symbol	PVR cell adhesion molecule [Source:HGNC Symbol;Acc:HGNC:9705]	cell surface
PVR	HGNC Symbol	PVR cell adhesion molecule [Source:HGNC Symbol;Acc:HGNC:9705]	cytoplasm
PVR	HGNC Symbol	PVR cell adhesion molecule [Source:HGNC Symbol;Acc:HGNC:9705]	signaling receptor activity
PVR	HGNC Symbol	PVR cell adhesion molecule [Source:HGNC Symbol;Acc:HGNC:9705]	extracellular space
PVR	HGNC Symbol	PVR cell adhesion molecule [Source:HGNC Symbol;Acc:HGNC:9705]	positive regulation of natural killer cell mediated cytotoxicity
PVR	HGNC Symbol	PVR cell adhesion molecule [Source:HGNC Symbol;Acc:HGNC:9705]	virus receptor activity
PVR	HGNC Symbol	PVR cell adhesion molecule [Source:HGNC Symbol;Acc:HGNC:9705]	homophilic cell adhesion via plasma membrane adhesion molecules
PVR	HGNC Symbol	PVR cell adhesion molecule [Source:HGNC Symbol;Acc:HGNC:9705]	adherens junction organization
PVR	HGNC Symbol	PVR cell adhesion molecule [Source:HGNC Symbol;Acc:HGNC:9705]	heterophilic cell-cell adhesion via plasma membrane cell adhesion molecules
PVR	HGNC Symbol	PVR cell adhesion molecule [Source:HGNC Symbol;Acc:HGNC:9705]	cell adhesion molecule binding
PVR	HGNC Symbol	PVR cell adhesion molecule [Source:HGNC Symbol;Acc:HGNC:9705]	positive regulation of natural killer cell mediated cytotoxicity directed against tumor cell target
PVR	HGNC Symbol	PVR cell adhesion molecule [Source:HGNC Symbol;Acc:HGNC:9705]	susceptibility to natural killer cell mediated cytotoxicity
PVR	HGNC Symbol	PVR cell adhesion molecule [Source:HGNC Symbol;Acc:HGNC:9705]	susceptibility to T cell mediated cytotoxicity
PVR	HGNC Symbol	PVR cell adhesion molecule [Source:HGNC Symbol;Acc:HGNC:9705]
PXDNL	HGNC Symbol	peroxidasin like [Source:HGNC Symbol;Acc:HGNC:26359]	oxidoreductase activity
PXDNL	HGNC Symbol	peroxidasin like [Source:HGNC Symbol;Acc:HGNC:26359]	oxidation-reduction process
PXDNL	HGNC Symbol	peroxidasin like [Source:HGNC Symbol;Acc:HGNC:26359]	heme binding
PXDNL	HGNC Symbol	peroxidasin like [Source:HGNC Symbol;Acc:HGNC:26359]	cellular oxidant detoxification
PXDNL	HGNC Symbol	peroxidasin like [Source:HGNC Symbol;Acc:HGNC:26359]	peroxidase activity
PXDNL	HGNC Symbol	peroxidasin like [Source:HGNC Symbol;Acc:HGNC:26359]	response to oxidative stress
PXDNL	HGNC Symbol	peroxidasin like [Source:HGNC Symbol;Acc:HGNC:26359]	protein binding
PXDNL	HGNC Symbol	peroxidasin like [Source:HGNC Symbol;Acc:HGNC:26359]	cytoplasm
PXDNL	HGNC Symbol	peroxidasin like [Source:HGNC Symbol;Acc:HGNC:26359]	metal ion binding
PXDNL	HGNC Symbol	peroxidasin like [Source:HGNC Symbol;Acc:HGNC:26359]	hydrolase activity
PXDNL	HGNC Symbol	peroxidasin like [Source:HGNC Symbol;Acc:HGNC:26359]	extracellular region
PXDNL	HGNC Symbol	peroxidasin like [Source:HGNC Symbol;Acc:HGNC:26359]	extracellular space
PXDNL	HGNC Symbol	peroxidasin like [Source:HGNC Symbol;Acc:HGNC:26359]	nucleic acid phosphodiester bond hydrolysis
PXDNL	HGNC Symbol	peroxidasin like [Source:HGNC Symbol;Acc:HGNC:26359]	nuclease activity
PXDNL	HGNC Symbol	peroxidasin like [Source:HGNC Symbol;Acc:HGNC:26359]	endonuclease activity
PXDNL	HGNC Symbol	peroxidasin like [Source:HGNC Symbol;Acc:HGNC:26359]	hydrogen peroxide catabolic process
PXDNL	HGNC Symbol	peroxidasin like [Source:HGNC Symbol;Acc:HGNC:26359]
QPRT	HGNC Symbol	quinolinate phosphoribosyltransferase [Source:HGNC Symbol;Acc:HGNC:9755]	catalytic activity
QPRT	HGNC Symbol	quinolinate phosphoribosyltransferase [Source:HGNC Symbol;Acc:HGNC:9755]	transferase activity, transferring pentosyl groups
QPRT	HGNC Symbol	quinolinate phosphoribosyltransferase [Source:HGNC Symbol;Acc:HGNC:9755]	nicotinate-nucleotide diphosphorylase (carboxylating) activity
QPRT	HGNC Symbol	quinolinate phosphoribosyltransferase [Source:HGNC Symbol;Acc:HGNC:9755]	NAD biosynthetic process
QPRT	HGNC Symbol	quinolinate phosphoribosyltransferase [Source:HGNC Symbol;Acc:HGNC:9755]	transferase activity
QPRT	HGNC Symbol	quinolinate phosphoribosyltransferase [Source:HGNC Symbol;Acc:HGNC:9755]	transferase activity, transferring glycosyl groups
QPRT	HGNC Symbol	quinolinate phosphoribosyltransferase [Source:HGNC Symbol;Acc:HGNC:9755]	protein binding
QPRT	HGNC Symbol	quinolinate phosphoribosyltransferase [Source:HGNC Symbol;Acc:HGNC:9755]	identical protein binding
QPRT	HGNC Symbol	quinolinate phosphoribosyltransferase [Source:HGNC Symbol;Acc:HGNC:9755]	pyridine nucleotide biosynthetic process
QPRT	HGNC Symbol	quinolinate phosphoribosyltransferase [Source:HGNC Symbol;Acc:HGNC:9755]	cytoplasm
QPRT	HGNC Symbol	quinolinate phosphoribosyltransferase [Source:HGNC Symbol;Acc:HGNC:9755]	cytosol
QPRT	HGNC Symbol	quinolinate phosphoribosyltransferase [Source:HGNC Symbol;Acc:HGNC:9755]	extracellular exosome
QPRT	HGNC Symbol	quinolinate phosphoribosyltransferase [Source:HGNC Symbol;Acc:HGNC:9755]	NAD metabolic process
QPRT	HGNC Symbol	quinolinate phosphoribosyltransferase [Source:HGNC Symbol;Acc:HGNC:9755]	quinolinate catabolic process
QPRT	HGNC Symbol	quinolinate phosphoribosyltransferase [Source:HGNC Symbol;Acc:HGNC:9755]	catalytic complex
QPRT	HGNC Symbol	quinolinate phosphoribosyltransferase [Source:HGNC Symbol;Acc:HGNC:9755]
QPRT	HGNC Symbol	quinolinate phosphoribosyltransferase [Source:HGNC Symbol;Acc:HGNC:9755]	quinolinate metabolic process
RTN4IP1	HGNC Symbol	reticulon 4 interacting protein 1 [Source:HGNC Symbol;Acc:HGNC:18647]	zinc ion binding
RTN4IP1	HGNC Symbol	reticulon 4 interacting protein 1 [Source:HGNC Symbol;Acc:HGNC:18647]	oxidation-reduction process
RTN4IP1	HGNC Symbol	reticulon 4 interacting protein 1 [Source:HGNC Symbol;Acc:HGNC:18647]	oxidoreductase activity
RTN4IP1	HGNC Symbol	reticulon 4 interacting protein 1 [Source:HGNC Symbol;Acc:HGNC:18647]	mitochondrion
RTN4IP1	HGNC Symbol	reticulon 4 interacting protein 1 [Source:HGNC Symbol;Acc:HGNC:18647]	membrane
RTN4IP1	HGNC Symbol	reticulon 4 interacting protein 1 [Source:HGNC Symbol;Acc:HGNC:18647]	mitochondrial outer membrane
RTN4IP1	HGNC Symbol	reticulon 4 interacting protein 1 [Source:HGNC Symbol;Acc:HGNC:18647]	protein binding
RTN4IP1	HGNC Symbol	reticulon 4 interacting protein 1 [Source:HGNC Symbol;Acc:HGNC:18647]	nervous system development
RTN4IP1	HGNC Symbol	reticulon 4 interacting protein 1 [Source:HGNC Symbol;Acc:HGNC:18647]	regulation of dendrite development
RTN4IP1	HGNC Symbol	reticulon 4 interacting protein 1 [Source:HGNC Symbol;Acc:HGNC:18647]
SEC61G	HGNC Symbol	SEC61 translocon subunit gamma [Source:HGNC Symbol;Acc:HGNC:18277]	membrane
SEC61G	HGNC Symbol	SEC61 translocon subunit gamma [Source:HGNC Symbol;Acc:HGNC:18277]	intracellular protein transport
SEC61G	HGNC Symbol	SEC61 translocon subunit gamma [Source:HGNC Symbol;Acc:HGNC:18277]	protein transport
SEC61G	HGNC Symbol	SEC61 translocon subunit gamma [Source:HGNC Symbol;Acc:HGNC:18277]	protein targeting
SEC61G	HGNC Symbol	SEC61 translocon subunit gamma [Source:HGNC Symbol;Acc:HGNC:18277]	P-P-bond-hydrolysis-driven protein transmembrane transporter activity
SEC61G	HGNC Symbol	SEC61 translocon subunit gamma [Source:HGNC Symbol;Acc:HGNC:18277]	integral component of membrane
SEC61G	HGNC Symbol	SEC61 translocon subunit gamma [Source:HGNC Symbol;Acc:HGNC:18277]	endoplasmic reticulum
SEC61G	HGNC Symbol	SEC61 translocon subunit gamma [Source:HGNC Symbol;Acc:HGNC:18277]	endoplasmic reticulum membrane
SEC61G	HGNC Symbol	SEC61 translocon subunit gamma [Source:HGNC Symbol;Acc:HGNC:18277]	protein transmembrane transport
SEC61G	HGNC Symbol	SEC61 translocon subunit gamma [Source:HGNC Symbol;Acc:HGNC:18277]	protein binding
SEC61G	HGNC Symbol	SEC61 translocon subunit gamma [Source:HGNC Symbol;Acc:HGNC:18277]	cytosol
SEC61G	HGNC Symbol	SEC61 translocon subunit gamma [Source:HGNC Symbol;Acc:HGNC:18277]	protein targeting to ER
SEC61G	HGNC Symbol	SEC61 translocon subunit gamma [Source:HGNC Symbol;Acc:HGNC:18277]	protein transmembrane transporter activity
SEC61G	HGNC Symbol	SEC61 translocon subunit gamma [Source:HGNC Symbol;Acc:HGNC:18277]	posttranslational protein targeting to membrane, translocation
SEC61G	HGNC Symbol	SEC61 translocon subunit gamma [Source:HGNC Symbol;Acc:HGNC:18277]	Ssh1 translocon complex
SEC61G	HGNC Symbol	SEC61 translocon subunit gamma [Source:HGNC Symbol;Acc:HGNC:18277]
SLC16A2	HGNC Symbol	solute carrier family 16 member 2 [Source:HGNC Symbol;Acc:HGNC:10923]	transmembrane transporter activity
SLC16A2	HGNC Symbol	solute carrier family 16 member 2 [Source:HGNC Symbol;Acc:HGNC:10923]	transmembrane transport
SLC16A2	HGNC Symbol	solute carrier family 16 member 2 [Source:HGNC Symbol;Acc:HGNC:10923]	integral component of plasma membrane
SLC16A2	HGNC Symbol	solute carrier family 16 member 2 [Source:HGNC Symbol;Acc:HGNC:10923]	thyroid hormone transport
SLC16A2	HGNC Symbol	solute carrier family 16 member 2 [Source:HGNC Symbol;Acc:HGNC:10923]	thyroid hormone transmembrane transporter activity
SLC16A2	HGNC Symbol	solute carrier family 16 member 2 [Source:HGNC Symbol;Acc:HGNC:10923]	plasma membrane
SLC16A2	HGNC Symbol	solute carrier family 16 member 2 [Source:HGNC Symbol;Acc:HGNC:10923]	membrane
SLC16A2	HGNC Symbol	solute carrier family 16 member 2 [Source:HGNC Symbol;Acc:HGNC:10923]	integral component of membrane
SLC16A2	HGNC Symbol	solute carrier family 16 member 2 [Source:HGNC Symbol;Acc:HGNC:10923]	symporter activity
SLC16A2	HGNC Symbol	solute carrier family 16 member 2 [Source:HGNC Symbol;Acc:HGNC:10923]	transport across blood-brain barrier
SLC16A2	HGNC Symbol	solute carrier family 16 member 2 [Source:HGNC Symbol;Acc:HGNC:10923]	apical plasma membrane
SLC16A2	HGNC Symbol	solute carrier family 16 member 2 [Source:HGNC Symbol;Acc:HGNC:10923]	amino acid import across plasma membrane
SLC16A2	HGNC Symbol	solute carrier family 16 member 2 [Source:HGNC Symbol;Acc:HGNC:10923]	monocarboxylic acid transmembrane transporter activity
SLC16A2	HGNC Symbol	solute carrier family 16 member 2 [Source:HGNC Symbol;Acc:HGNC:10923]	monocarboxylic acid transport
SLC16A2	HGNC Symbol	solute carrier family 16 member 2 [Source:HGNC Symbol;Acc:HGNC:10923]	sodium-independent organic anion transport
SLC16A2	HGNC Symbol	solute carrier family 16 member 2 [Source:HGNC Symbol;Acc:HGNC:10923]	transporter activity
SLC16A2	HGNC Symbol	solute carrier family 16 member 2 [Source:HGNC Symbol;Acc:HGNC:10923]	amino acid transmembrane transporter activity
SLC16A2	HGNC Symbol	solute carrier family 16 member 2 [Source:HGNC Symbol;Acc:HGNC:10923]	cellular amino acid metabolic process
SLC16A2	HGNC Symbol	solute carrier family 16 member 2 [Source:HGNC Symbol;Acc:HGNC:10923]	thyroid hormone metabolic process
SLC16A2	HGNC Symbol	solute carrier family 16 member 2 [Source:HGNC Symbol;Acc:HGNC:10923]	negative regulation of neural precursor cell proliferation
SLC16A2	HGNC Symbol	solute carrier family 16 member 2 [Source:HGNC Symbol;Acc:HGNC:10923]	thyroid hormone generation
SLC16A2	HGNC Symbol	solute carrier family 16 member 2 [Source:HGNC Symbol;Acc:HGNC:10923]	thyroid-stimulating hormone secretion
SLC35A2	HGNC Symbol	solute carrier family 35 member A2 [Source:HGNC Symbol;Acc:HGNC:11022]	membrane
SLC35A2	HGNC Symbol	solute carrier family 35 member A2 [Source:HGNC Symbol;Acc:HGNC:11022]	integral component of membrane
SLC35A2	HGNC Symbol	solute carrier family 35 member A2 [Source:HGNC Symbol;Acc:HGNC:11022]	Golgi apparatus
SLC35A2	HGNC Symbol	solute carrier family 35 member A2 [Source:HGNC Symbol;Acc:HGNC:11022]	nucleoplasm
SLC35A2	HGNC Symbol	solute carrier family 35 member A2 [Source:HGNC Symbol;Acc:HGNC:11022]	Golgi membrane
SLC35A2	HGNC Symbol	solute carrier family 35 member A2 [Source:HGNC Symbol;Acc:HGNC:11022]	protein binding
SLC35A2	HGNC Symbol	solute carrier family 35 member A2 [Source:HGNC Symbol;Acc:HGNC:11022]	carbohydrate transport
SLC35A2	HGNC Symbol	solute carrier family 35 member A2 [Source:HGNC Symbol;Acc:HGNC:11022]	pyrimidine nucleotide-sugar transmembrane transporter activity
SLC35A2	HGNC Symbol	solute carrier family 35 member A2 [Source:HGNC Symbol;Acc:HGNC:11022]	pyrimidine nucleotide-sugar transmembrane transport
SLC35A2	HGNC Symbol	solute carrier family 35 member A2 [Source:HGNC Symbol;Acc:HGNC:11022]	integral component of Golgi membrane
SLC35A2	HGNC Symbol	solute carrier family 35 member A2 [Source:HGNC Symbol;Acc:HGNC:11022]	endoplasmic reticulum
SLC35A2	HGNC Symbol	solute carrier family 35 member A2 [Source:HGNC Symbol;Acc:HGNC:11022]	galactose metabolic process
SLC35A2	HGNC Symbol	solute carrier family 35 member A2 [Source:HGNC Symbol;Acc:HGNC:11022]	UDP-galactose transmembrane transporter activity
SLC35A2	HGNC Symbol	solute carrier family 35 member A2 [Source:HGNC Symbol;Acc:HGNC:11022]	UDP-galactose transmembrane transport
SLC35A2	HGNC Symbol	solute carrier family 35 member A2 [Source:HGNC Symbol;Acc:HGNC:11022]
SLC6A3	HGNC Symbol	solute carrier family 6 member 3 [Source:HGNC Symbol;Acc:HGNC:11049]	integral component of membrane
SLC6A3	HGNC Symbol	solute carrier family 6 member 3 [Source:HGNC Symbol;Acc:HGNC:11049]	membrane
SLC6A3	HGNC Symbol	solute carrier family 6 member 3 [Source:HGNC Symbol;Acc:HGNC:11049]	integral component of plasma membrane
SLC6A3	HGNC Symbol	solute carrier family 6 member 3 [Source:HGNC Symbol;Acc:HGNC:11049]	neurotransmitter transport
SLC6A3	HGNC Symbol	solute carrier family 6 member 3 [Source:HGNC Symbol;Acc:HGNC:11049]
SLC6A3	HGNC Symbol	solute carrier family 6 member 3 [Source:HGNC Symbol;Acc:HGNC:11049]	dopamine:sodium symporter activity
SLC6A3	HGNC Symbol	solute carrier family 6 member 3 [Source:HGNC Symbol;Acc:HGNC:11049]	metal ion binding
SLC6A3	HGNC Symbol	solute carrier family 6 member 3 [Source:HGNC Symbol;Acc:HGNC:11049]	plasma membrane
SLC6A3	HGNC Symbol	solute carrier family 6 member 3 [Source:HGNC Symbol;Acc:HGNC:11049]	symporter activity
SLC6A3	HGNC Symbol	solute carrier family 6 member 3 [Source:HGNC Symbol;Acc:HGNC:11049]	protein binding
SLC6A3	HGNC Symbol	solute carrier family 6 member 3 [Source:HGNC Symbol;Acc:HGNC:11049]	cell surface
SLC6A3	HGNC Symbol	solute carrier family 6 member 3 [Source:HGNC Symbol;Acc:HGNC:11049]	axon
SLC6A3	HGNC Symbol	solute carrier family 6 member 3 [Source:HGNC Symbol;Acc:HGNC:11049]	sodium ion transmembrane transport
SLC6A3	HGNC Symbol	solute carrier family 6 member 3 [Source:HGNC Symbol;Acc:HGNC:11049]	neuron projection
SLC6A3	HGNC Symbol	solute carrier family 6 member 3 [Source:HGNC Symbol;Acc:HGNC:11049]	cytoplasm
SLC6A3	HGNC Symbol	solute carrier family 6 member 3 [Source:HGNC Symbol;Acc:HGNC:11049]	presynaptic membrane
SLC6A3	HGNC Symbol	solute carrier family 6 member 3 [Source:HGNC Symbol;Acc:HGNC:11049]	neurotransmitter transmembrane transporter activity
SLC6A3	HGNC Symbol	solute carrier family 6 member 3 [Source:HGNC Symbol;Acc:HGNC:11049]	monoamine transmembrane transporter activity
SLC6A3	HGNC Symbol	solute carrier family 6 member 3 [Source:HGNC Symbol;Acc:HGNC:11049]	neurotransmitter biosynthetic process
SLC6A3	HGNC Symbol	solute carrier family 6 member 3 [Source:HGNC Symbol;Acc:HGNC:11049]	dopamine uptake
SLC6A3	HGNC Symbol	solute carrier family 6 member 3 [Source:HGNC Symbol;Acc:HGNC:11049]	norepinephrine uptake
SLC6A3	HGNC Symbol	solute carrier family 6 member 3 [Source:HGNC Symbol;Acc:HGNC:11049]	neuronal cell body
SLC6A3	HGNC Symbol	solute carrier family 6 member 3 [Source:HGNC Symbol;Acc:HGNC:11049]	flotillin complex
SLC6A3	HGNC Symbol	solute carrier family 6 member 3 [Source:HGNC Symbol;Acc:HGNC:11049]	membrane raft
SLC6A3	HGNC Symbol	solute carrier family 6 member 3 [Source:HGNC Symbol;Acc:HGNC:11049]	hyaloid vascular plexus regression
SLC6A3	HGNC Symbol	solute carrier family 6 member 3 [Source:HGNC Symbol;Acc:HGNC:11049]	norepinephrine:sodium symporter activity
SLC6A3	HGNC Symbol	solute carrier family 6 member 3 [Source:HGNC Symbol;Acc:HGNC:11049]	monoamine transport
SLC6A3	HGNC Symbol	solute carrier family 6 member 3 [Source:HGNC Symbol;Acc:HGNC:11049]	norepinephrine transport
SLC6A3	HGNC Symbol	solute carrier family 6 member 3 [Source:HGNC Symbol;Acc:HGNC:11049]	dopamine uptake involved in synaptic transmission
SLC6A3	HGNC Symbol	solute carrier family 6 member 3 [Source:HGNC Symbol;Acc:HGNC:11049]	neuronal cell body membrane
SLC6A3	HGNC Symbol	solute carrier family 6 member 3 [Source:HGNC Symbol;Acc:HGNC:11049]	dopamine transport
SLC6A3	HGNC Symbol	solute carrier family 6 member 3 [Source:HGNC Symbol;Acc:HGNC:11049]	protease binding
SLC6A3	HGNC Symbol	solute carrier family 6 member 3 [Source:HGNC Symbol;Acc:HGNC:11049]	signaling receptor binding
SLC6A3	HGNC Symbol	solute carrier family 6 member 3 [Source:HGNC Symbol;Acc:HGNC:11049]	drug binding
SLC6A3	HGNC Symbol	solute carrier family 6 member 3 [Source:HGNC Symbol;Acc:HGNC:11049]	dopamine binding
SLC6A3	HGNC Symbol	solute carrier family 6 member 3 [Source:HGNC Symbol;Acc:HGNC:11049]	protein-containing complex binding
SLC6A3	HGNC Symbol	solute carrier family 6 member 3 [Source:HGNC Symbol;Acc:HGNC:11049]	protein N-terminus binding
SLC6A3	HGNC Symbol	solute carrier family 6 member 3 [Source:HGNC Symbol;Acc:HGNC:11049]	protein phosphatase 2A binding
SLC6A3	HGNC Symbol	solute carrier family 6 member 3 [Source:HGNC Symbol;Acc:HGNC:11049]	neurotransmitter uptake
SLC6A3	HGNC Symbol	solute carrier family 6 member 3 [Source:HGNC Symbol;Acc:HGNC:11049]	aging
SLC6A3	HGNC Symbol	solute carrier family 6 member 3 [Source:HGNC Symbol;Acc:HGNC:11049]	lactation
SLC6A3	HGNC Symbol	solute carrier family 6 member 3 [Source:HGNC Symbol;Acc:HGNC:11049]	sensory perception of smell
SLC6A3	HGNC Symbol	solute carrier family 6 member 3 [Source:HGNC Symbol;Acc:HGNC:11049]	locomotory behavior
SLC6A3	HGNC Symbol	solute carrier family 6 member 3 [Source:HGNC Symbol;Acc:HGNC:11049]	response to iron ion
SLC6A3	HGNC Symbol	solute carrier family 6 member 3 [Source:HGNC Symbol;Acc:HGNC:11049]	response to organic cyclic compound
SLC6A3	HGNC Symbol	solute carrier family 6 member 3 [Source:HGNC Symbol;Acc:HGNC:11049]	adenohypophysis development
SLC6A3	HGNC Symbol	solute carrier family 6 member 3 [Source:HGNC Symbol;Acc:HGNC:11049]	response to nicotine
SLC6A3	HGNC Symbol	solute carrier family 6 member 3 [Source:HGNC Symbol;Acc:HGNC:11049]	positive regulation of multicellular organism growth
SLC6A3	HGNC Symbol	solute carrier family 6 member 3 [Source:HGNC Symbol;Acc:HGNC:11049]	regulation of dopamine metabolic process
SLC6A3	HGNC Symbol	solute carrier family 6 member 3 [Source:HGNC Symbol;Acc:HGNC:11049]	response to cocaine
SLC6A3	HGNC Symbol	solute carrier family 6 member 3 [Source:HGNC Symbol;Acc:HGNC:11049]	dopamine biosynthetic process
SLC6A3	HGNC Symbol	solute carrier family 6 member 3 [Source:HGNC Symbol;Acc:HGNC:11049]	dopamine catabolic process
SLC6A3	HGNC Symbol	solute carrier family 6 member 3 [Source:HGNC Symbol;Acc:HGNC:11049]	response to drug
SLC6A3	HGNC Symbol	solute carrier family 6 member 3 [Source:HGNC Symbol;Acc:HGNC:11049]	response to ethanol
SLC6A3	HGNC Symbol	solute carrier family 6 member 3 [Source:HGNC Symbol;Acc:HGNC:11049]	response to cAMP
SLC6A3	HGNC Symbol	solute carrier family 6 member 3 [Source:HGNC Symbol;Acc:HGNC:11049]	prepulse inhibition
SLC6A3	HGNC Symbol	solute carrier family 6 member 3 [Source:HGNC Symbol;Acc:HGNC:11049]	dopaminergic synapse
SLC6A3	HGNC Symbol	solute carrier family 6 member 3 [Source:HGNC Symbol;Acc:HGNC:11049]	integral component of postsynaptic membrane
SLC6A3	HGNC Symbol	solute carrier family 6 member 3 [Source:HGNC Symbol;Acc:HGNC:11049]	integral component of presynaptic membrane
STAT4	HGNC Symbol	signal transducer and activator of transcription 4 [Source:HGNC Symbol;Acc:HGNC:11365]	DNA binding
STAT4	HGNC Symbol	signal transducer and activator of transcription 4 [Source:HGNC Symbol;Acc:HGNC:11365]	regulation of transcription, DNA-templated
STAT4	HGNC Symbol	signal transducer and activator of transcription 4 [Source:HGNC Symbol;Acc:HGNC:11365]	nucleus
STAT4	HGNC Symbol	signal transducer and activator of transcription 4 [Source:HGNC Symbol;Acc:HGNC:11365]	signal transduction
STAT4	HGNC Symbol	signal transducer and activator of transcription 4 [Source:HGNC Symbol;Acc:HGNC:11365]	DNA-binding transcription factor activity
STAT4	HGNC Symbol	signal transducer and activator of transcription 4 [Source:HGNC Symbol;Acc:HGNC:11365]	cytokine-mediated signaling pathway
STAT4	HGNC Symbol	signal transducer and activator of transcription 4 [Source:HGNC Symbol;Acc:HGNC:11365]	positive regulation of transcription by RNA polymerase II
STAT4	HGNC Symbol	signal transducer and activator of transcription 4 [Source:HGNC Symbol;Acc:HGNC:11365]	cytoplasm
STAT4	HGNC Symbol	signal transducer and activator of transcription 4 [Source:HGNC Symbol;Acc:HGNC:11365]	protein binding
STAT4	HGNC Symbol	signal transducer and activator of transcription 4 [Source:HGNC Symbol;Acc:HGNC:11365]	identical protein binding
STAT4	HGNC Symbol	signal transducer and activator of transcription 4 [Source:HGNC Symbol;Acc:HGNC:11365]	RNA polymerase II cis-regulatory region sequence-specific DNA binding
STAT4	HGNC Symbol	signal transducer and activator of transcription 4 [Source:HGNC Symbol;Acc:HGNC:11365]	cytosol
STAT4	HGNC Symbol	signal transducer and activator of transcription 4 [Source:HGNC Symbol;Acc:HGNC:11365]	DNA-binding transcription factor activity, RNA polymerase II-specific
STAT4	HGNC Symbol	signal transducer and activator of transcription 4 [Source:HGNC Symbol;Acc:HGNC:11365]	nuclear chromatin
STAT4	HGNC Symbol	signal transducer and activator of transcription 4 [Source:HGNC Symbol;Acc:HGNC:11365]	nucleoplasm
STAT4	HGNC Symbol	signal transducer and activator of transcription 4 [Source:HGNC Symbol;Acc:HGNC:11365]	defense response
STAT4	HGNC Symbol	signal transducer and activator of transcription 4 [Source:HGNC Symbol;Acc:HGNC:11365]	DNA-binding transcription activator activity, RNA polymerase II-specific
STAT4	HGNC Symbol	signal transducer and activator of transcription 4 [Source:HGNC Symbol;Acc:HGNC:11365]	regulation of cell population proliferation
STAT4	HGNC Symbol	signal transducer and activator of transcription 4 [Source:HGNC Symbol;Acc:HGNC:11365]	interleukin-12-mediated signaling pathway
STAT4	HGNC Symbol	signal transducer and activator of transcription 4 [Source:HGNC Symbol;Acc:HGNC:11365]	receptor signaling pathway via JAK-STAT
STAT4	HGNC Symbol	signal transducer and activator of transcription 4 [Source:HGNC Symbol;Acc:HGNC:11365]	interleukin-23-mediated signaling pathway
STAT4	HGNC Symbol	signal transducer and activator of transcription 4 [Source:HGNC Symbol;Acc:HGNC:11365]	interleukin-35-mediated signaling pathway
STAT4	HGNC Symbol	signal transducer and activator of transcription 4 [Source:HGNC Symbol;Acc:HGNC:11365]	response to peptide hormone
STAT4	HGNC Symbol	signal transducer and activator of transcription 4 [Source:HGNC Symbol;Acc:HGNC:11365]	interleukin-21-mediated signaling pathway
STAT4	HGNC Symbol	signal transducer and activator of transcription 4 [Source:HGNC Symbol;Acc:HGNC:11365]
TBC1D24	HGNC Symbol	TBC1 domain family member 24 [Source:HGNC Symbol;Acc:HGNC:29203]	neuron projection development
TBC1D24	HGNC Symbol	TBC1 domain family member 24 [Source:HGNC Symbol;Acc:HGNC:29203]	cytoplasm
TBC1D24	HGNC Symbol	TBC1 domain family member 24 [Source:HGNC Symbol;Acc:HGNC:29203]	membrane
TBC1D24	HGNC Symbol	TBC1 domain family member 24 [Source:HGNC Symbol;Acc:HGNC:29203]	plasma membrane
TBC1D24	HGNC Symbol	TBC1 domain family member 24 [Source:HGNC Symbol;Acc:HGNC:29203]	cytoplasmic vesicle
TBC1D24	HGNC Symbol	TBC1 domain family member 24 [Source:HGNC Symbol;Acc:HGNC:29203]	cell junction
TBC1D24	HGNC Symbol	TBC1 domain family member 24 [Source:HGNC Symbol;Acc:HGNC:29203]	cell projection
TBC1D24	HGNC Symbol	TBC1 domain family member 24 [Source:HGNC Symbol;Acc:HGNC:29203]	positive regulation of GTPase activity
TBC1D24	HGNC Symbol	TBC1 domain family member 24 [Source:HGNC Symbol;Acc:HGNC:29203]	protein binding
TBC1D24	HGNC Symbol	TBC1 domain family member 24 [Source:HGNC Symbol;Acc:HGNC:29203]	synapse
TBC1D24	HGNC Symbol	TBC1 domain family member 24 [Source:HGNC Symbol;Acc:HGNC:29203]	cytoplasmic vesicle membrane
TBC1D24	HGNC Symbol	TBC1 domain family member 24 [Source:HGNC Symbol;Acc:HGNC:29203]	GTPase activator activity
TBC1D24	HGNC Symbol	TBC1 domain family member 24 [Source:HGNC Symbol;Acc:HGNC:29203]	presynapse
TBC1D24	HGNC Symbol	TBC1 domain family member 24 [Source:HGNC Symbol;Acc:HGNC:29203]	terminal bouton
TBC1D24	HGNC Symbol	TBC1 domain family member 24 [Source:HGNC Symbol;Acc:HGNC:29203]	neuron death in response to oxidative stress
TBC1D24	HGNC Symbol	TBC1 domain family member 24 [Source:HGNC Symbol;Acc:HGNC:29203]	neuromuscular junction
TBC1D24	HGNC Symbol	TBC1 domain family member 24 [Source:HGNC Symbol;Acc:HGNC:29203]
TCN1	HGNC Symbol	transcobalamin 1 [Source:HGNC Symbol;Acc:HGNC:11652]
TCN1	HGNC Symbol	transcobalamin 1 [Source:HGNC Symbol;Acc:HGNC:11652]	cobalamin binding
TCN1	HGNC Symbol	transcobalamin 1 [Source:HGNC Symbol;Acc:HGNC:11652]	cobalamin transport
TCN1	HGNC Symbol	transcobalamin 1 [Source:HGNC Symbol;Acc:HGNC:11652]	ion transport
TCN1	HGNC Symbol	transcobalamin 1 [Source:HGNC Symbol;Acc:HGNC:11652]	extracellular region
TCN1	HGNC Symbol	transcobalamin 1 [Source:HGNC Symbol;Acc:HGNC:11652]	extracellular space
TCN1	HGNC Symbol	transcobalamin 1 [Source:HGNC Symbol;Acc:HGNC:11652]	protein binding
TCN1	HGNC Symbol	transcobalamin 1 [Source:HGNC Symbol;Acc:HGNC:11652]	cobalt ion transport
TCN1	HGNC Symbol	transcobalamin 1 [Source:HGNC Symbol;Acc:HGNC:11652]	neutrophil degranulation
TCN1	HGNC Symbol	transcobalamin 1 [Source:HGNC Symbol;Acc:HGNC:11652]	specific granule lumen
TCN1	HGNC Symbol	transcobalamin 1 [Source:HGNC Symbol;Acc:HGNC:11652]	tertiary granule lumen
TCN1	HGNC Symbol	transcobalamin 1 [Source:HGNC Symbol;Acc:HGNC:11652]	cobalamin metabolic process
TCP1	HGNC Symbol	t-complex 1 [Source:HGNC Symbol;Acc:HGNC:11655]	ATP binding
TCP1	HGNC Symbol	t-complex 1 [Source:HGNC Symbol;Acc:HGNC:11655]	protein folding
TCP1	HGNC Symbol	t-complex 1 [Source:HGNC Symbol;Acc:HGNC:11655]	unfolded protein binding
TCP1	HGNC Symbol	t-complex 1 [Source:HGNC Symbol;Acc:HGNC:11655]	protein stabilization
TCP1	HGNC Symbol	t-complex 1 [Source:HGNC Symbol;Acc:HGNC:11655]	RNA binding
TCP1	HGNC Symbol	t-complex 1 [Source:HGNC Symbol;Acc:HGNC:11655]	cytoplasm
TCP1	HGNC Symbol	t-complex 1 [Source:HGNC Symbol;Acc:HGNC:11655]	nucleotide binding
TCP1	HGNC Symbol	t-complex 1 [Source:HGNC Symbol;Acc:HGNC:11655]	cytoskeleton
TCP1	HGNC Symbol	t-complex 1 [Source:HGNC Symbol;Acc:HGNC:11655]	cytosol
TCP1	HGNC Symbol	t-complex 1 [Source:HGNC Symbol;Acc:HGNC:11655]	microtubule
TCP1	HGNC Symbol	t-complex 1 [Source:HGNC Symbol;Acc:HGNC:11655]	protein binding
TCP1	HGNC Symbol	t-complex 1 [Source:HGNC Symbol;Acc:HGNC:11655]	microtubule organizing center
TCP1	HGNC Symbol	t-complex 1 [Source:HGNC Symbol;Acc:HGNC:11655]	tubulin complex assembly
TCP1	HGNC Symbol	t-complex 1 [Source:HGNC Symbol;Acc:HGNC:11655]	extracellular exosome
TCP1	HGNC Symbol	t-complex 1 [Source:HGNC Symbol;Acc:HGNC:11655]	interleukin-12-mediated signaling pathway
TCP1	HGNC Symbol	t-complex 1 [Source:HGNC Symbol;Acc:HGNC:11655]	positive regulation of telomere maintenance via telomerase
TCP1	HGNC Symbol	t-complex 1 [Source:HGNC Symbol;Acc:HGNC:11655]	positive regulation of telomerase activity
TCP1	HGNC Symbol	t-complex 1 [Source:HGNC Symbol;Acc:HGNC:11655]	centrosome
TCP1	HGNC Symbol	t-complex 1 [Source:HGNC Symbol;Acc:HGNC:11655]	ubiquitin protein ligase binding
TCP1	HGNC Symbol	t-complex 1 [Source:HGNC Symbol;Acc:HGNC:11655]	scaRNA localization to Cajal body
TCP1	HGNC Symbol	t-complex 1 [Source:HGNC Symbol;Acc:HGNC:11655]	positive regulation of establishment of protein localization to telomere
TCP1	HGNC Symbol	t-complex 1 [Source:HGNC Symbol;Acc:HGNC:11655]	positive regulation of protein localization to Cajal body
TCP1	HGNC Symbol	t-complex 1 [Source:HGNC Symbol;Acc:HGNC:11655]	positive regulation of telomerase RNA localization to Cajal body
TCP1	HGNC Symbol	t-complex 1 [Source:HGNC Symbol;Acc:HGNC:11655]	binding of sperm to zona pellucida
TCP1	HGNC Symbol	t-complex 1 [Source:HGNC Symbol;Acc:HGNC:11655]	translocation of peptides or proteins into host cell cytoplasm
TCP1	HGNC Symbol	t-complex 1 [Source:HGNC Symbol;Acc:HGNC:11655]	toxin transport
TCP1	HGNC Symbol	t-complex 1 [Source:HGNC Symbol;Acc:HGNC:11655]	regulation of macrophage apoptotic process
TCP1	HGNC Symbol	t-complex 1 [Source:HGNC Symbol;Acc:HGNC:11655]	pericentriolar material
TCP1	HGNC Symbol	t-complex 1 [Source:HGNC Symbol;Acc:HGNC:11655]	heterochromatin
TCP1	HGNC Symbol	t-complex 1 [Source:HGNC Symbol;Acc:HGNC:11655]	acrosomal vesicle
TCP1	HGNC Symbol	t-complex 1 [Source:HGNC Symbol;Acc:HGNC:11655]	zona pellucida receptor complex
TCP1	HGNC Symbol	t-complex 1 [Source:HGNC Symbol;Acc:HGNC:11655]	nuclear heterochromatin
TCP1	HGNC Symbol	t-complex 1 [Source:HGNC Symbol;Acc:HGNC:11655]	Golgi apparatus
TCP1	HGNC Symbol	t-complex 1 [Source:HGNC Symbol;Acc:HGNC:11655]	chaperonin-containing T-complex
TCP1	HGNC Symbol	t-complex 1 [Source:HGNC Symbol;Acc:HGNC:11655]	cell body
TCP1	HGNC Symbol	t-complex 1 [Source:HGNC Symbol;Acc:HGNC:11655]
TESPA1	HGNC Symbol	thymocyte expressed, positive selection associated 1 [Source:HGNC Symbol;Acc:HGNC:29109]	signaling receptor binding
TESPA1	HGNC Symbol	thymocyte expressed, positive selection associated 1 [Source:HGNC Symbol;Acc:HGNC:29109]	COP9 signalosome assembly
TESPA1	HGNC Symbol	thymocyte expressed, positive selection associated 1 [Source:HGNC Symbol;Acc:HGNC:29109]	positive regulation of T cell receptor signaling pathway
TESPA1	HGNC Symbol	thymocyte expressed, positive selection associated 1 [Source:HGNC Symbol;Acc:HGNC:29109]	cytoplasm
TESPA1	HGNC Symbol	thymocyte expressed, positive selection associated 1 [Source:HGNC Symbol;Acc:HGNC:29109]	membrane
TESPA1	HGNC Symbol	thymocyte expressed, positive selection associated 1 [Source:HGNC Symbol;Acc:HGNC:29109]	endoplasmic reticulum
TESPA1	HGNC Symbol	thymocyte expressed, positive selection associated 1 [Source:HGNC Symbol;Acc:HGNC:29109]	endoplasmic reticulum membrane
TESPA1	HGNC Symbol	thymocyte expressed, positive selection associated 1 [Source:HGNC Symbol;Acc:HGNC:29109]	COP9 signalosome
TESPA1	HGNC Symbol	thymocyte expressed, positive selection associated 1 [Source:HGNC Symbol;Acc:HGNC:29109]	positive regulation of T cell differentiation in thymus
TESPA1	HGNC Symbol	thymocyte expressed, positive selection associated 1 [Source:HGNC Symbol;Acc:HGNC:29109]	phospholipase binding
TESPA1	HGNC Symbol	thymocyte expressed, positive selection associated 1 [Source:HGNC Symbol;Acc:HGNC:29109]	protein localization
TESPA1	HGNC Symbol	thymocyte expressed, positive selection associated 1 [Source:HGNC Symbol;Acc:HGNC:29109]	T cell differentiation in thymus
TESPA1	HGNC Symbol	thymocyte expressed, positive selection associated 1 [Source:HGNC Symbol;Acc:HGNC:29109]	TCR signalosome assembly
TESPA1	HGNC Symbol	thymocyte expressed, positive selection associated 1 [Source:HGNC Symbol;Acc:HGNC:29109]	regulation of T cell receptor signaling pathway
TESPA1	HGNC Symbol	thymocyte expressed, positive selection associated 1 [Source:HGNC Symbol;Acc:HGNC:29109]	TCR signalosome
TESPA1	HGNC Symbol	thymocyte expressed, positive selection associated 1 [Source:HGNC Symbol;Acc:HGNC:29109]
TIMM8A	HGNC Symbol	translocase of inner mitochondrial membrane 8A [Source:HGNC Symbol;Acc:HGNC:11817]	protein transport
TIMM8A	HGNC Symbol	translocase of inner mitochondrial membrane 8A [Source:HGNC Symbol;Acc:HGNC:11817]	mitochondrial inner membrane
TIMM8A	HGNC Symbol	translocase of inner mitochondrial membrane 8A [Source:HGNC Symbol;Acc:HGNC:11817]	mitochondrion
TIMM8A	HGNC Symbol	translocase of inner mitochondrial membrane 8A [Source:HGNC Symbol;Acc:HGNC:11817]	mitochondrial intermembrane space
TIMM8A	HGNC Symbol	translocase of inner mitochondrial membrane 8A [Source:HGNC Symbol;Acc:HGNC:11817]	chaperone-mediated protein transport
TIMM8A	HGNC Symbol	translocase of inner mitochondrial membrane 8A [Source:HGNC Symbol;Acc:HGNC:11817]	membrane
TIMM8A	HGNC Symbol	translocase of inner mitochondrial membrane 8A [Source:HGNC Symbol;Acc:HGNC:11817]	metal ion binding
TIMM8A	HGNC Symbol	translocase of inner mitochondrial membrane 8A [Source:HGNC Symbol;Acc:HGNC:11817]	protein binding
TIMM8A	HGNC Symbol	translocase of inner mitochondrial membrane 8A [Source:HGNC Symbol;Acc:HGNC:11817]	nervous system development
TIMM8A	HGNC Symbol	translocase of inner mitochondrial membrane 8A [Source:HGNC Symbol;Acc:HGNC:11817]
TNFRSF13B	HGNC Symbol	TNF receptor superfamily member 13B [Source:HGNC Symbol;Acc:HGNC:18153]	membrane
TNFRSF13B	HGNC Symbol	TNF receptor superfamily member 13B [Source:HGNC Symbol;Acc:HGNC:18153]	integral component of membrane
TNFRSF13B	HGNC Symbol	TNF receptor superfamily member 13B [Source:HGNC Symbol;Acc:HGNC:18153]	integral component of plasma membrane
TNFRSF13B	HGNC Symbol	TNF receptor superfamily member 13B [Source:HGNC Symbol;Acc:HGNC:18153]
TNFRSF13B	HGNC Symbol	TNF receptor superfamily member 13B [Source:HGNC Symbol;Acc:HGNC:18153]	protein binding
TNFRSF13B	HGNC Symbol	TNF receptor superfamily member 13B [Source:HGNC Symbol;Acc:HGNC:18153]	immune system process
TNFRSF13B	HGNC Symbol	TNF receptor superfamily member 13B [Source:HGNC Symbol;Acc:HGNC:18153]	adaptive immune response
TNFRSF13B	HGNC Symbol	TNF receptor superfamily member 13B [Source:HGNC Symbol;Acc:HGNC:18153]	plasma membrane
TNFRSF13B	HGNC Symbol	TNF receptor superfamily member 13B [Source:HGNC Symbol;Acc:HGNC:18153]	tumor necrosis factor-mediated signaling pathway
TNFRSF13B	HGNC Symbol	TNF receptor superfamily member 13B [Source:HGNC Symbol;Acc:HGNC:18153]	signaling receptor activity
TNFRSF13B	HGNC Symbol	TNF receptor superfamily member 13B [Source:HGNC Symbol;Acc:HGNC:18153]	cell surface receptor signaling pathway
TNFRSF13B	HGNC Symbol	TNF receptor superfamily member 13B [Source:HGNC Symbol;Acc:HGNC:18153]	B cell homeostasis
TNFRSF13B	HGNC Symbol	TNF receptor superfamily member 13B [Source:HGNC Symbol;Acc:HGNC:18153]	hematopoietic progenitor cell differentiation
TNFRSF13B	HGNC Symbol	TNF receptor superfamily member 13B [Source:HGNC Symbol;Acc:HGNC:18153]	negative regulation of B cell proliferation
TP53AIP1	HGNC Symbol	tumor protein p53 regulated apoptosis inducing protein 1 [Source:HGNC Symbol;Acc:HGNC:29984]	apoptotic process
TP53AIP1	HGNC Symbol	tumor protein p53 regulated apoptosis inducing protein 1 [Source:HGNC Symbol;Acc:HGNC:29984]	mitochondrion
TP53AIP1	HGNC Symbol	tumor protein p53 regulated apoptosis inducing protein 1 [Source:HGNC Symbol;Acc:HGNC:29984]	molecular_function
TP53AIP1	HGNC Symbol	tumor protein p53 regulated apoptosis inducing protein 1 [Source:HGNC Symbol;Acc:HGNC:29984]	mitochondrial matrix
TP53AIP1	HGNC Symbol	tumor protein p53 regulated apoptosis inducing protein 1 [Source:HGNC Symbol;Acc:HGNC:29984]	regulation of apoptotic process
TP53AIP1	HGNC Symbol	tumor protein p53 regulated apoptosis inducing protein 1 [Source:HGNC Symbol;Acc:HGNC:29984]
TP53I11	HGNC Symbol	tumor protein p53 inducible protein 11 [Source:HGNC Symbol;Acc:HGNC:16842]	membrane
TP53I11	HGNC Symbol	tumor protein p53 inducible protein 11 [Source:HGNC Symbol;Acc:HGNC:16842]	integral component of membrane
TP53I11	HGNC Symbol	tumor protein p53 inducible protein 11 [Source:HGNC Symbol;Acc:HGNC:16842]	negative regulation of cell population proliferation
TP53I11	HGNC Symbol	tumor protein p53 inducible protein 11 [Source:HGNC Symbol;Acc:HGNC:16842]
TRBC2	HGNC Symbol	T cell receptor beta constant 2 [Source:HGNC Symbol;Acc:HGNC:12157]	membrane
TRBC2	HGNC Symbol	T cell receptor beta constant 2 [Source:HGNC Symbol;Acc:HGNC:12157]	integral component of membrane
TRBV25-1	HGNC Symbol	T cell receptor beta variable 25-1 [Source:HGNC Symbol;Acc:HGNC:12205]
TRBV25-1	HGNC Symbol	T cell receptor beta variable 25-1 [Source:HGNC Symbol;Acc:HGNC:12205]	membrane
TRBV25-1	HGNC Symbol	T cell receptor beta variable 25-1 [Source:HGNC Symbol;Acc:HGNC:12205]	plasma membrane
TRBV25-1	HGNC Symbol	T cell receptor beta variable 25-1 [Source:HGNC Symbol;Acc:HGNC:12205]	immune system process
TRBV25-1	HGNC Symbol	T cell receptor beta variable 25-1 [Source:HGNC Symbol;Acc:HGNC:12205]	adaptive immune response
TRBV25-1	HGNC Symbol	T cell receptor beta variable 25-1 [Source:HGNC Symbol;Acc:HGNC:12205]	cell surface receptor signaling pathway
TRBV25-1	HGNC Symbol	T cell receptor beta variable 25-1 [Source:HGNC Symbol;Acc:HGNC:12205]	T cell receptor complex
TRBV5-1	HGNC Symbol	T cell receptor beta variable 5-1 [Source:HGNC Symbol;Acc:HGNC:12218]	membrane
TRBV5-1	HGNC Symbol	T cell receptor beta variable 5-1 [Source:HGNC Symbol;Acc:HGNC:12218]	plasma membrane
TRBV5-1	HGNC Symbol	T cell receptor beta variable 5-1 [Source:HGNC Symbol;Acc:HGNC:12218]	immune system process
TRBV5-1	HGNC Symbol	T cell receptor beta variable 5-1 [Source:HGNC Symbol;Acc:HGNC:12218]	adaptive immune response
TRBV5-1	HGNC Symbol	T cell receptor beta variable 5-1 [Source:HGNC Symbol;Acc:HGNC:12218]	cell surface receptor signaling pathway
TRBV5-1	HGNC Symbol	T cell receptor beta variable 5-1 [Source:HGNC Symbol;Acc:HGNC:12218]	T cell receptor complex
VDAC1	HGNC Symbol	voltage dependent anion channel 1 [Source:HGNC Symbol;Acc:HGNC:12669]	integral component of membrane
VDAC1	HGNC Symbol	voltage dependent anion channel 1 [Source:HGNC Symbol;Acc:HGNC:12669]	transmembrane transport
VDAC1	HGNC Symbol	voltage dependent anion channel 1 [Source:HGNC Symbol;Acc:HGNC:12669]	anion transport
VDAC1	HGNC Symbol	voltage dependent anion channel 1 [Source:HGNC Symbol;Acc:HGNC:12669]	voltage-gated anion channel activity
VDAC1	HGNC Symbol	voltage dependent anion channel 1 [Source:HGNC Symbol;Acc:HGNC:12669]	anion transmembrane transport
VDAC1	HGNC Symbol	voltage dependent anion channel 1 [Source:HGNC Symbol;Acc:HGNC:12669]	mitochondrial outer membrane
VDAC1	HGNC Symbol	voltage dependent anion channel 1 [Source:HGNC Symbol;Acc:HGNC:12669]	nucleus
VDAC1	HGNC Symbol	voltage dependent anion channel 1 [Source:HGNC Symbol;Acc:HGNC:12669]	membrane
VDAC1	HGNC Symbol	voltage dependent anion channel 1 [Source:HGNC Symbol;Acc:HGNC:12669]	negative regulation of apoptotic process
VDAC1	HGNC Symbol	voltage dependent anion channel 1 [Source:HGNC Symbol;Acc:HGNC:12669]	plasma membrane
VDAC1	HGNC Symbol	voltage dependent anion channel 1 [Source:HGNC Symbol;Acc:HGNC:12669]	ion transport
VDAC1	HGNC Symbol	voltage dependent anion channel 1 [Source:HGNC Symbol;Acc:HGNC:12669]	apoptotic process
VDAC1	HGNC Symbol	voltage dependent anion channel 1 [Source:HGNC Symbol;Acc:HGNC:12669]	mitochondrion
VDAC1	HGNC Symbol	voltage dependent anion channel 1 [Source:HGNC Symbol;Acc:HGNC:12669]	membrane raft
VDAC1	HGNC Symbol	voltage dependent anion channel 1 [Source:HGNC Symbol;Acc:HGNC:12669]	porin activity
VDAC1	HGNC Symbol	voltage dependent anion channel 1 [Source:HGNC Symbol;Acc:HGNC:12669]	inorganic anion transport
VDAC1	HGNC Symbol	voltage dependent anion channel 1 [Source:HGNC Symbol;Acc:HGNC:12669]	pore complex
VDAC1	HGNC Symbol	voltage dependent anion channel 1 [Source:HGNC Symbol;Acc:HGNC:12669]	viral process
VDAC1	HGNC Symbol	voltage dependent anion channel 1 [Source:HGNC Symbol;Acc:HGNC:12669]	mitochondrial membrane
VDAC1	HGNC Symbol	voltage dependent anion channel 1 [Source:HGNC Symbol;Acc:HGNC:12669]	protein binding
VDAC1	HGNC Symbol	voltage dependent anion channel 1 [Source:HGNC Symbol;Acc:HGNC:12669]	phosphatidylcholine binding
VDAC1	HGNC Symbol	voltage dependent anion channel 1 [Source:HGNC Symbol;Acc:HGNC:12669]	extracellular exosome
VDAC1	HGNC Symbol	voltage dependent anion channel 1 [Source:HGNC Symbol;Acc:HGNC:12669]	ion channel binding
VDAC1	HGNC Symbol	voltage dependent anion channel 1 [Source:HGNC Symbol;Acc:HGNC:12669]	regulation of autophagy of mitochondrion
VDAC1	HGNC Symbol	voltage dependent anion channel 1 [Source:HGNC Symbol;Acc:HGNC:12669]	epithelial cell differentiation
VDAC1	HGNC Symbol	voltage dependent anion channel 1 [Source:HGNC Symbol;Acc:HGNC:12669]	pyruvate metabolic process
VDAC1	HGNC Symbol	voltage dependent anion channel 1 [Source:HGNC Symbol;Acc:HGNC:12669]	mitochondrial nucleoid
VDAC1	HGNC Symbol	voltage dependent anion channel 1 [Source:HGNC Symbol;Acc:HGNC:12669]	cholesterol binding
VDAC1	HGNC Symbol	voltage dependent anion channel 1 [Source:HGNC Symbol;Acc:HGNC:12669]	macroautophagy
VDAC1	HGNC Symbol	voltage dependent anion channel 1 [Source:HGNC Symbol;Acc:HGNC:12669]	protein kinase binding
VDAC1	HGNC Symbol	voltage dependent anion channel 1 [Source:HGNC Symbol;Acc:HGNC:12669]	ceramide binding
VDAC1	HGNC Symbol	voltage dependent anion channel 1 [Source:HGNC Symbol;Acc:HGNC:12669]	negative regulation of calcium import into the mitochondrion
VDAC1	HGNC Symbol	voltage dependent anion channel 1 [Source:HGNC Symbol;Acc:HGNC:12669]	positive regulation of mitophagy
VDAC1	HGNC Symbol	voltage dependent anion channel 1 [Source:HGNC Symbol;Acc:HGNC:12669]	mitochondrial permeability transition pore complex
VDAC1	HGNC Symbol	voltage dependent anion channel 1 [Source:HGNC Symbol;Acc:HGNC:12669]	anion channel activity
VDAC1	HGNC Symbol	voltage dependent anion channel 1 [Source:HGNC Symbol;Acc:HGNC:12669]	protein-containing complex binding
VDAC1	HGNC Symbol	voltage dependent anion channel 1 [Source:HGNC Symbol;Acc:HGNC:12669]	behavioral fear response
VDAC1	HGNC Symbol	voltage dependent anion channel 1 [Source:HGNC Symbol;Acc:HGNC:12669]	mitochondrial calcium ion transmembrane transport
VDAC1	HGNC Symbol	voltage dependent anion channel 1 [Source:HGNC Symbol;Acc:HGNC:12669]	chemical synaptic transmission
VDAC1	HGNC Symbol	voltage dependent anion channel 1 [Source:HGNC Symbol;Acc:HGNC:12669]	neuron-neuron synaptic transmission
VDAC1	HGNC Symbol	voltage dependent anion channel 1 [Source:HGNC Symbol;Acc:HGNC:12669]	learning
VDAC1	HGNC Symbol	voltage dependent anion channel 1 [Source:HGNC Symbol;Acc:HGNC:12669]	negative regulation of reactive oxygen species metabolic process
VDAC1	HGNC Symbol	voltage dependent anion channel 1 [Source:HGNC Symbol;Acc:HGNC:12669]	synaptic vesicle
VDAC1	HGNC Symbol	voltage dependent anion channel 1 [Source:HGNC Symbol;Acc:HGNC:12669]	protein-containing complex
VDAC1	HGNC Symbol	voltage dependent anion channel 1 [Source:HGNC Symbol;Acc:HGNC:12669]
VDAC1P2	HGNC Symbol	voltage dependent anion channel 1 pseudogene 2 [Source:HGNC Symbol;Acc:HGNC:12670]
ZIC2	HGNC Symbol	Zic family member 2 [Source:HGNC Symbol;Acc:HGNC:12873]	nucleic acid binding
ZIC2	HGNC Symbol	Zic family member 2 [Source:HGNC Symbol;Acc:HGNC:12873]	nucleus
ZIC2	HGNC Symbol	Zic family member 2 [Source:HGNC Symbol;Acc:HGNC:12873]	cytoplasm
ZIC2	HGNC Symbol	Zic family member 2 [Source:HGNC Symbol;Acc:HGNC:12873]	metal ion binding
ZIC2	HGNC Symbol	Zic family member 2 [Source:HGNC Symbol;Acc:HGNC:12873]	nucleoplasm
ZIC2	HGNC Symbol	Zic family member 2 [Source:HGNC Symbol;Acc:HGNC:12873]	DNA binding
ZIC2	HGNC Symbol	Zic family member 2 [Source:HGNC Symbol;Acc:HGNC:12873]	DNA-binding transcription factor activity
ZIC2	HGNC Symbol	Zic family member 2 [Source:HGNC Symbol;Acc:HGNC:12873]	chromatin DNA binding
ZIC2	HGNC Symbol	Zic family member 2 [Source:HGNC Symbol;Acc:HGNC:12873]	multicellular organism development
ZIC2	HGNC Symbol	Zic family member 2 [Source:HGNC Symbol;Acc:HGNC:12873]	cell differentiation
ZIC2	HGNC Symbol	Zic family member 2 [Source:HGNC Symbol;Acc:HGNC:12873]	nuclear body
ZIC2	HGNC Symbol	Zic family member 2 [Source:HGNC Symbol;Acc:HGNC:12873]	nervous system development
ZIC2	HGNC Symbol	Zic family member 2 [Source:HGNC Symbol;Acc:HGNC:12873]	visual perception
ZIC2	HGNC Symbol	Zic family member 2 [Source:HGNC Symbol;Acc:HGNC:12873]	positive regulation of transcription, DNA-templated
ZIC2	HGNC Symbol	Zic family member 2 [Source:HGNC Symbol;Acc:HGNC:12873]	regulation of transcription by RNA polymerase II
ZIC2	HGNC Symbol	Zic family member 2 [Source:HGNC Symbol;Acc:HGNC:12873]	DNA-binding transcription factor activity, RNA polymerase II-specific
ZIC2	HGNC Symbol	Zic family member 2 [Source:HGNC Symbol;Acc:HGNC:12873]	RNA polymerase II cis-regulatory region sequence-specific DNA binding
ZIC2	HGNC Symbol	Zic family member 2 [Source:HGNC Symbol;Acc:HGNC:12873]	central nervous system development
ZIC2	HGNC Symbol	Zic family member 2 [Source:HGNC Symbol;Acc:HGNC:12873]	negative regulation of transcription, DNA-templated
ZIC2	HGNC Symbol	Zic family member 2 [Source:HGNC Symbol;Acc:HGNC:12873]	brain development
ZIC2	HGNC Symbol	Zic family member 2 [Source:HGNC Symbol;Acc:HGNC:12873]	positive regulation of DNA-binding transcription factor activity
ZIC2	HGNC Symbol	Zic family member 2 [Source:HGNC Symbol;Acc:HGNC:12873]
ZSWIM3	HGNC Symbol	zinc finger SWIM-type containing 3 [Source:HGNC Symbol;Acc:HGNC:16157]	zinc ion binding
ZSWIM3	HGNC Symbol	zinc finger SWIM-type containing 3 [Source:HGNC Symbol;Acc:HGNC:16157]	metal ion binding
ZSWIM3	HGNC Symbol	zinc finger SWIM-type containing 3 [Source:HGNC Symbol;Acc:HGNC:16157]	protein binding

## Sheet: MutationDataset1
Gene name	Source of gene name	Gene description	GO term name
ACVRL1	HGNC Symbol	activin A receptor like type 1 [Source:HGNC Symbol;Acc:HGNC:175]	ATP binding
ACVRL1	HGNC Symbol	activin A receptor like type 1 [Source:HGNC Symbol;Acc:HGNC:175]	membrane
ACVRL1	HGNC Symbol	activin A receptor like type 1 [Source:HGNC Symbol;Acc:HGNC:175]	transmembrane receptor protein serine/threonine kinase activity
ACVRL1	HGNC Symbol	activin A receptor like type 1 [Source:HGNC Symbol;Acc:HGNC:175]	transmembrane receptor protein serine/threonine kinase signaling pathway
ACVRL1	HGNC Symbol	activin A receptor like type 1 [Source:HGNC Symbol;Acc:HGNC:175]	nucleotide binding
ACVRL1	HGNC Symbol	activin A receptor like type 1 [Source:HGNC Symbol;Acc:HGNC:175]	kinase activity
ACVRL1	HGNC Symbol	activin A receptor like type 1 [Source:HGNC Symbol;Acc:HGNC:175]	transferase activity
ACVRL1	HGNC Symbol	activin A receptor like type 1 [Source:HGNC Symbol;Acc:HGNC:175]	phosphorylation
ACVRL1	HGNC Symbol	activin A receptor like type 1 [Source:HGNC Symbol;Acc:HGNC:175]	protein phosphorylation
ACVRL1	HGNC Symbol	activin A receptor like type 1 [Source:HGNC Symbol;Acc:HGNC:175]	protein kinase activity
ACVRL1	HGNC Symbol	activin A receptor like type 1 [Source:HGNC Symbol;Acc:HGNC:175]	negative regulation of gene expression
ACVRL1	HGNC Symbol	activin A receptor like type 1 [Source:HGNC Symbol;Acc:HGNC:175]	negative regulation of blood vessel endothelial cell migration
ACVRL1	HGNC Symbol	activin A receptor like type 1 [Source:HGNC Symbol;Acc:HGNC:175]	negative regulation of endothelial cell migration
ACVRL1	HGNC Symbol	activin A receptor like type 1 [Source:HGNC Symbol;Acc:HGNC:175]	positive regulation of transcription by RNA polymerase II
ACVRL1	HGNC Symbol	activin A receptor like type 1 [Source:HGNC Symbol;Acc:HGNC:175]	positive regulation of BMP signaling pathway
ACVRL1	HGNC Symbol	activin A receptor like type 1 [Source:HGNC Symbol;Acc:HGNC:175]	BMP signaling pathway
ACVRL1	HGNC Symbol	activin A receptor like type 1 [Source:HGNC Symbol;Acc:HGNC:175]	endothelial tube morphogenesis
ACVRL1	HGNC Symbol	activin A receptor like type 1 [Source:HGNC Symbol;Acc:HGNC:175]	integral component of membrane
ACVRL1	HGNC Symbol	activin A receptor like type 1 [Source:HGNC Symbol;Acc:HGNC:175]	metal ion binding
ACVRL1	HGNC Symbol	activin A receptor like type 1 [Source:HGNC Symbol;Acc:HGNC:175]	protein serine/threonine kinase activity
ACVRL1	HGNC Symbol	activin A receptor like type 1 [Source:HGNC Symbol;Acc:HGNC:175]	plasma membrane
ACVRL1	HGNC Symbol	activin A receptor like type 1 [Source:HGNC Symbol;Acc:HGNC:175]	protein binding
ACVRL1	HGNC Symbol	activin A receptor like type 1 [Source:HGNC Symbol;Acc:HGNC:175]	angiogenesis
ACVRL1	HGNC Symbol	activin A receptor like type 1 [Source:HGNC Symbol;Acc:HGNC:175]	integral component of plasma membrane
ACVRL1	HGNC Symbol	activin A receptor like type 1 [Source:HGNC Symbol;Acc:HGNC:175]	activin receptor signaling pathway
ACVRL1	HGNC Symbol	activin A receptor like type 1 [Source:HGNC Symbol;Acc:HGNC:175]	transforming growth factor beta receptor signaling pathway
ACVRL1	HGNC Symbol	activin A receptor like type 1 [Source:HGNC Symbol;Acc:HGNC:175]	heart development
ACVRL1	HGNC Symbol	activin A receptor like type 1 [Source:HGNC Symbol;Acc:HGNC:175]	transforming growth factor beta receptor activity, type I
ACVRL1	HGNC Symbol	activin A receptor like type 1 [Source:HGNC Symbol;Acc:HGNC:175]	SMAD binding
ACVRL1	HGNC Symbol	activin A receptor like type 1 [Source:HGNC Symbol;Acc:HGNC:175]	dorsal/ventral pattern formation
ACVRL1	HGNC Symbol	activin A receptor like type 1 [Source:HGNC Symbol;Acc:HGNC:175]	cellular response to growth factor stimulus
ACVRL1	HGNC Symbol	activin A receptor like type 1 [Source:HGNC Symbol;Acc:HGNC:175]	cellular response to BMP stimulus
ACVRL1	HGNC Symbol	activin A receptor like type 1 [Source:HGNC Symbol;Acc:HGNC:175]	receptor complex
ACVRL1	HGNC Symbol	activin A receptor like type 1 [Source:HGNC Symbol;Acc:HGNC:175]	protein kinase binding
ACVRL1	HGNC Symbol	activin A receptor like type 1 [Source:HGNC Symbol;Acc:HGNC:175]	positive regulation of transcription, DNA-templated
ACVRL1	HGNC Symbol	activin A receptor like type 1 [Source:HGNC Symbol;Acc:HGNC:175]	cellular response to transforming growth factor beta stimulus
ACVRL1	HGNC Symbol	activin A receptor like type 1 [Source:HGNC Symbol;Acc:HGNC:175]	endocardial cushion morphogenesis
ACVRL1	HGNC Symbol	activin A receptor like type 1 [Source:HGNC Symbol;Acc:HGNC:175]	negative regulation of cell growth
ACVRL1	HGNC Symbol	activin A receptor like type 1 [Source:HGNC Symbol;Acc:HGNC:175]	cell surface
ACVRL1	HGNC Symbol	activin A receptor like type 1 [Source:HGNC Symbol;Acc:HGNC:175]	positive regulation of pathway-restricted SMAD protein phosphorylation
ACVRL1	HGNC Symbol	activin A receptor like type 1 [Source:HGNC Symbol;Acc:HGNC:175]	activin binding
ACVRL1	HGNC Symbol	activin A receptor like type 1 [Source:HGNC Symbol;Acc:HGNC:175]	blood vessel remodeling
ACVRL1	HGNC Symbol	activin A receptor like type 1 [Source:HGNC Symbol;Acc:HGNC:175]	regulation of transcription, DNA-templated
ACVRL1	HGNC Symbol	activin A receptor like type 1 [Source:HGNC Symbol;Acc:HGNC:175]	dorsal aorta morphogenesis
ACVRL1	HGNC Symbol	activin A receptor like type 1 [Source:HGNC Symbol;Acc:HGNC:175]	BMP receptor activity
ACVRL1	HGNC Symbol	activin A receptor like type 1 [Source:HGNC Symbol;Acc:HGNC:175]	negative regulation of cell population proliferation
ACVRL1	HGNC Symbol	activin A receptor like type 1 [Source:HGNC Symbol;Acc:HGNC:175]	negative regulation of cell migration
ACVRL1	HGNC Symbol	activin A receptor like type 1 [Source:HGNC Symbol;Acc:HGNC:175]	lymphatic endothelial cell differentiation
ACVRL1	HGNC Symbol	activin A receptor like type 1 [Source:HGNC Symbol;Acc:HGNC:175]	signal transduction
ACVRL1	HGNC Symbol	activin A receptor like type 1 [Source:HGNC Symbol;Acc:HGNC:175]	transforming growth factor beta-activated receptor activity
ACVRL1	HGNC Symbol	activin A receptor like type 1 [Source:HGNC Symbol;Acc:HGNC:175]	activin receptor activity, type I
ACVRL1	HGNC Symbol	activin A receptor like type 1 [Source:HGNC Symbol;Acc:HGNC:175]	transforming growth factor beta binding
ACVRL1	HGNC Symbol	activin A receptor like type 1 [Source:HGNC Symbol;Acc:HGNC:175]	regulation of endothelial cell proliferation
ACVRL1	HGNC Symbol	activin A receptor like type 1 [Source:HGNC Symbol;Acc:HGNC:175]	lymphangiogenesis
ACVRL1	HGNC Symbol	activin A receptor like type 1 [Source:HGNC Symbol;Acc:HGNC:175]	blood vessel maturation
ACVRL1	HGNC Symbol	activin A receptor like type 1 [Source:HGNC Symbol;Acc:HGNC:175]	blood vessel endothelial cell proliferation involved in sprouting angiogenesis
ACVRL1	HGNC Symbol	activin A receptor like type 1 [Source:HGNC Symbol;Acc:HGNC:175]	regulation of DNA replication
ACVRL1	HGNC Symbol	activin A receptor like type 1 [Source:HGNC Symbol;Acc:HGNC:175]	negative regulation of cell adhesion
ACVRL1	HGNC Symbol	activin A receptor like type 1 [Source:HGNC Symbol;Acc:HGNC:175]	blood circulation
ACVRL1	HGNC Symbol	activin A receptor like type 1 [Source:HGNC Symbol;Acc:HGNC:175]	regulation of blood pressure
ACVRL1	HGNC Symbol	activin A receptor like type 1 [Source:HGNC Symbol;Acc:HGNC:175]	positive regulation of chondrocyte differentiation
ACVRL1	HGNC Symbol	activin A receptor like type 1 [Source:HGNC Symbol;Acc:HGNC:175]	wound healing, spreading of epidermal cells
ACVRL1	HGNC Symbol	activin A receptor like type 1 [Source:HGNC Symbol;Acc:HGNC:175]	regulation of blood vessel endothelial cell migration
ACVRL1	HGNC Symbol	activin A receptor like type 1 [Source:HGNC Symbol;Acc:HGNC:175]	negative regulation of focal adhesion assembly
ACVRL1	HGNC Symbol	activin A receptor like type 1 [Source:HGNC Symbol;Acc:HGNC:175]	artery development
ACVRL1	HGNC Symbol	activin A receptor like type 1 [Source:HGNC Symbol;Acc:HGNC:175]	venous blood vessel development
ACVRL1	HGNC Symbol	activin A receptor like type 1 [Source:HGNC Symbol;Acc:HGNC:175]	retina vasculature development in camera-type eye
ACVRL1	HGNC Symbol	activin A receptor like type 1 [Source:HGNC Symbol;Acc:HGNC:175]	negative regulation of DNA biosynthetic process
ACVRL1	HGNC Symbol	activin A receptor like type 1 [Source:HGNC Symbol;Acc:HGNC:175]	BMP receptor complex
ACVRL1	HGNC Symbol	activin A receptor like type 1 [Source:HGNC Symbol;Acc:HGNC:175]	response to hypoxia
ACVRL1	HGNC Symbol	activin A receptor like type 1 [Source:HGNC Symbol;Acc:HGNC:175]	in utero embryonic development
ACVRL1	HGNC Symbol	activin A receptor like type 1 [Source:HGNC Symbol;Acc:HGNC:175]	negative regulation of endothelial cell proliferation
ACVRL1	HGNC Symbol	activin A receptor like type 1 [Source:HGNC Symbol;Acc:HGNC:175]	positive regulation of endothelial cell proliferation
ACVRL1	HGNC Symbol	activin A receptor like type 1 [Source:HGNC Symbol;Acc:HGNC:175]	negative regulation of endothelial cell differentiation
ACVRL1	HGNC Symbol	activin A receptor like type 1 [Source:HGNC Symbol;Acc:HGNC:175]	positive regulation of endothelial cell differentiation
ACVRL1	HGNC Symbol	activin A receptor like type 1 [Source:HGNC Symbol;Acc:HGNC:175]	positive regulation of angiogenesis
ACVRL1	HGNC Symbol	activin A receptor like type 1 [Source:HGNC Symbol;Acc:HGNC:175]	blood vessel morphogenesis
ACVRL1	HGNC Symbol	activin A receptor like type 1 [Source:HGNC Symbol;Acc:HGNC:175]	dendrite
ACVRL1	HGNC Symbol	activin A receptor like type 1 [Source:HGNC Symbol;Acc:HGNC:175]	neuronal cell body
ACVRL1	HGNC Symbol	activin A receptor like type 1 [Source:HGNC Symbol;Acc:HGNC:175]
ADGRA2	HGNC Symbol	adhesion G protein-coupled receptor A2 [Source:HGNC Symbol;Acc:HGNC:17849]	protein binding
ADGRA2	HGNC Symbol	adhesion G protein-coupled receptor A2 [Source:HGNC Symbol;Acc:HGNC:17849]	G protein-coupled receptor signaling pathway
ADGRA2	HGNC Symbol	adhesion G protein-coupled receptor A2 [Source:HGNC Symbol;Acc:HGNC:17849]	integral component of membrane
ADGRA2	HGNC Symbol	adhesion G protein-coupled receptor A2 [Source:HGNC Symbol;Acc:HGNC:17849]	G protein-coupled receptor activity
ADGRA2	HGNC Symbol	adhesion G protein-coupled receptor A2 [Source:HGNC Symbol;Acc:HGNC:17849]	membrane
ADGRA2	HGNC Symbol	adhesion G protein-coupled receptor A2 [Source:HGNC Symbol;Acc:HGNC:17849]	cell surface receptor signaling pathway
ADGRA2	HGNC Symbol	adhesion G protein-coupled receptor A2 [Source:HGNC Symbol;Acc:HGNC:17849]	transmembrane signaling receptor activity
ADGRA2	HGNC Symbol	adhesion G protein-coupled receptor A2 [Source:HGNC Symbol;Acc:HGNC:17849]	plasma membrane
ADGRA2	HGNC Symbol	adhesion G protein-coupled receptor A2 [Source:HGNC Symbol;Acc:HGNC:17849]	filopodium
ADGRA2	HGNC Symbol	adhesion G protein-coupled receptor A2 [Source:HGNC Symbol;Acc:HGNC:17849]	cell projection
ADGRA2	HGNC Symbol	adhesion G protein-coupled receptor A2 [Source:HGNC Symbol;Acc:HGNC:17849]	Wnt signaling pathway
ADGRA2	HGNC Symbol	adhesion G protein-coupled receptor A2 [Source:HGNC Symbol;Acc:HGNC:17849]	signal transduction
ADGRA2	HGNC Symbol	adhesion G protein-coupled receptor A2 [Source:HGNC Symbol;Acc:HGNC:17849]	angiogenesis
ADGRA2	HGNC Symbol	adhesion G protein-coupled receptor A2 [Source:HGNC Symbol;Acc:HGNC:17849]	sprouting angiogenesis
ADGRA2	HGNC Symbol	adhesion G protein-coupled receptor A2 [Source:HGNC Symbol;Acc:HGNC:17849]	central nervous system development
ADGRA2	HGNC Symbol	adhesion G protein-coupled receptor A2 [Source:HGNC Symbol;Acc:HGNC:17849]	positive regulation of canonical Wnt signaling pathway
ADGRA2	HGNC Symbol	adhesion G protein-coupled receptor A2 [Source:HGNC Symbol;Acc:HGNC:17849]	endothelial cell migration
ADGRA2	HGNC Symbol	adhesion G protein-coupled receptor A2 [Source:HGNC Symbol;Acc:HGNC:17849]	regulation of angiogenesis
ADGRA2	HGNC Symbol	adhesion G protein-coupled receptor A2 [Source:HGNC Symbol;Acc:HGNC:17849]	regulation of chemotaxis
ADGRA2	HGNC Symbol	adhesion G protein-coupled receptor A2 [Source:HGNC Symbol;Acc:HGNC:17849]	regulation of establishment of blood-brain barrier
ADGRA2	HGNC Symbol	adhesion G protein-coupled receptor A2 [Source:HGNC Symbol;Acc:HGNC:17849]	Wnt signalosome
ADGRA2	HGNC Symbol	adhesion G protein-coupled receptor A2 [Source:HGNC Symbol;Acc:HGNC:17849]	positive regulation of endothelial cell migration
ADGRA2	HGNC Symbol	adhesion G protein-coupled receptor A2 [Source:HGNC Symbol;Acc:HGNC:17849]	negative regulation of vascular endothelial growth factor signaling pathway
ADGRA2	HGNC Symbol	adhesion G protein-coupled receptor A2 [Source:HGNC Symbol;Acc:HGNC:17849]	cell surface
AFDN	HGNC Symbol	afadin, adherens junction formation factor [Source:HGNC Symbol;Acc:HGNC:7137]	signal transduction
AFDN	HGNC Symbol	afadin, adherens junction formation factor [Source:HGNC Symbol;Acc:HGNC:7137]	plasma membrane
AFDN	HGNC Symbol	afadin, adherens junction formation factor [Source:HGNC Symbol;Acc:HGNC:7137]	cell junction
AFDN	HGNC Symbol	afadin, adherens junction formation factor [Source:HGNC Symbol;Acc:HGNC:7137]	protein binding
AFDN	HGNC Symbol	afadin, adherens junction formation factor [Source:HGNC Symbol;Acc:HGNC:7137]	nuclear speck
AFDN	HGNC Symbol	afadin, adherens junction formation factor [Source:HGNC Symbol;Acc:HGNC:7137]	nucleoplasm
AFDN	HGNC Symbol	afadin, adherens junction formation factor [Source:HGNC Symbol;Acc:HGNC:7137]	cytosol
AFDN	HGNC Symbol	afadin, adherens junction formation factor [Source:HGNC Symbol;Acc:HGNC:7137]	cell adhesion
AFDN	HGNC Symbol	afadin, adherens junction formation factor [Source:HGNC Symbol;Acc:HGNC:7137]	negative regulation of cell migration
AFDN	HGNC Symbol	afadin, adherens junction formation factor [Source:HGNC Symbol;Acc:HGNC:7137]	adherens junction
AFDN	HGNC Symbol	afadin, adherens junction formation factor [Source:HGNC Symbol;Acc:HGNC:7137]	pore complex
AFDN	HGNC Symbol	afadin, adherens junction formation factor [Source:HGNC Symbol;Acc:HGNC:7137]	positive regulation of GTPase activity
AFDN	HGNC Symbol	afadin, adherens junction formation factor [Source:HGNC Symbol;Acc:HGNC:7137]	regulation of protein localization
AFDN	HGNC Symbol	afadin, adherens junction formation factor [Source:HGNC Symbol;Acc:HGNC:7137]	cadherin binding
AFDN	HGNC Symbol	afadin, adherens junction formation factor [Source:HGNC Symbol;Acc:HGNC:7137]	positive regulation of gene expression
AFDN	HGNC Symbol	afadin, adherens junction formation factor [Source:HGNC Symbol;Acc:HGNC:7137]	tight junction
AFDN	HGNC Symbol	afadin, adherens junction formation factor [Source:HGNC Symbol;Acc:HGNC:7137]	cell-cell signaling
AFDN	HGNC Symbol	afadin, adherens junction formation factor [Source:HGNC Symbol;Acc:HGNC:7137]	cell-cell junction
AFDN	HGNC Symbol	afadin, adherens junction formation factor [Source:HGNC Symbol;Acc:HGNC:7137]	pore complex assembly
AFDN	HGNC Symbol	afadin, adherens junction formation factor [Source:HGNC Symbol;Acc:HGNC:7137]	cell adhesion molecule binding
AFDN	HGNC Symbol	afadin, adherens junction formation factor [Source:HGNC Symbol;Acc:HGNC:7137]	adherens junction organization
AFDN	HGNC Symbol	afadin, adherens junction formation factor [Source:HGNC Symbol;Acc:HGNC:7137]	protein C-terminus binding
AFDN	HGNC Symbol	afadin, adherens junction formation factor [Source:HGNC Symbol;Acc:HGNC:7137]	actin filament binding
AFDN	HGNC Symbol	afadin, adherens junction formation factor [Source:HGNC Symbol;Acc:HGNC:7137]	positive regulation of cell-cell adhesion
AFDN	HGNC Symbol	afadin, adherens junction formation factor [Source:HGNC Symbol;Acc:HGNC:7137]	bicellular tight junction assembly
AFDN	HGNC Symbol	afadin, adherens junction formation factor [Source:HGNC Symbol;Acc:HGNC:7137]	cell-cell contact zone
AFDN	HGNC Symbol	afadin, adherens junction formation factor [Source:HGNC Symbol;Acc:HGNC:7137]	cell-cell adhesion mediated by cadherin
AFDN	HGNC Symbol	afadin, adherens junction formation factor [Source:HGNC Symbol;Acc:HGNC:7137]	Ras GTPase binding
AFDN	HGNC Symbol	afadin, adherens junction formation factor [Source:HGNC Symbol;Acc:HGNC:7137]	establishment of protein localization to plasma membrane
AFDN	HGNC Symbol	afadin, adherens junction formation factor [Source:HGNC Symbol;Acc:HGNC:7137]	establishment of endothelial intestinal barrier
AFDN	HGNC Symbol	afadin, adherens junction formation factor [Source:HGNC Symbol;Acc:HGNC:7137]	positive regulation of cell-cell adhesion mediated by cadherin
AFDN	HGNC Symbol	afadin, adherens junction formation factor [Source:HGNC Symbol;Acc:HGNC:7137]
AFDN	HGNC Symbol	afadin, adherens junction formation factor [Source:HGNC Symbol;Acc:HGNC:7137]	telencephalon development
AFDN	HGNC Symbol	afadin, adherens junction formation factor [Source:HGNC Symbol;Acc:HGNC:7137]	cerebral cortex development
AFDN	HGNC Symbol	afadin, adherens junction formation factor [Source:HGNC Symbol;Acc:HGNC:7137]	adherens junction maintenance
AFDN	HGNC Symbol	afadin, adherens junction formation factor [Source:HGNC Symbol;Acc:HGNC:7137]	brain morphogenesis
AFDN	HGNC Symbol	afadin, adherens junction formation factor [Source:HGNC Symbol;Acc:HGNC:7137]	homeostasis of number of cells
AFDN	HGNC Symbol	afadin, adherens junction formation factor [Source:HGNC Symbol;Acc:HGNC:7137]	radial glial cell differentiation
AFDN	HGNC Symbol	afadin, adherens junction formation factor [Source:HGNC Symbol;Acc:HGNC:7137]	neuroepithelial cell differentiation
AFDN	HGNC Symbol	afadin, adherens junction formation factor [Source:HGNC Symbol;Acc:HGNC:7137]	regulation of oligodendrocyte progenitor proliferation
AFDN	HGNC Symbol	afadin, adherens junction formation factor [Source:HGNC Symbol;Acc:HGNC:7137]	protein localization to cell junction
AFDN	HGNC Symbol	afadin, adherens junction formation factor [Source:HGNC Symbol;Acc:HGNC:7137]	cytoplasm
AFDN	HGNC Symbol	afadin, adherens junction formation factor [Source:HGNC Symbol;Acc:HGNC:7137]	apical junction complex
AFDN	HGNC Symbol	afadin, adherens junction formation factor [Source:HGNC Symbol;Acc:HGNC:7137]	apical part of cell
AFF2	HGNC Symbol	AF4/FMR2 family member 2 [Source:HGNC Symbol;Acc:HGNC:3776]	mRNA processing
AFF2	HGNC Symbol	AF4/FMR2 family member 2 [Source:HGNC Symbol;Acc:HGNC:3776]	RNA splicing
AFF2	HGNC Symbol	AF4/FMR2 family member 2 [Source:HGNC Symbol;Acc:HGNC:3776]	nucleus
AFF2	HGNC Symbol	AF4/FMR2 family member 2 [Source:HGNC Symbol;Acc:HGNC:3776]	RNA binding
AFF2	HGNC Symbol	AF4/FMR2 family member 2 [Source:HGNC Symbol;Acc:HGNC:3776]	nuclear speck
AFF2	HGNC Symbol	AF4/FMR2 family member 2 [Source:HGNC Symbol;Acc:HGNC:3776]	regulation of gene expression
AFF2	HGNC Symbol	AF4/FMR2 family member 2 [Source:HGNC Symbol;Acc:HGNC:3776]	regulation of RNA splicing
AFF2	HGNC Symbol	AF4/FMR2 family member 2 [Source:HGNC Symbol;Acc:HGNC:3776]	brain development
AFF2	HGNC Symbol	AF4/FMR2 family member 2 [Source:HGNC Symbol;Acc:HGNC:3776]	G-quadruplex RNA binding
AFF2	HGNC Symbol	AF4/FMR2 family member 2 [Source:HGNC Symbol;Acc:HGNC:3776]	learning or memory
AFF2	HGNC Symbol	AF4/FMR2 family member 2 [Source:HGNC Symbol;Acc:HGNC:3776]	negative regulation of gene expression
AFF2	HGNC Symbol	AF4/FMR2 family member 2 [Source:HGNC Symbol;Acc:HGNC:3776]	nuclear speck organization
AFF2	HGNC Symbol	AF4/FMR2 family member 2 [Source:HGNC Symbol;Acc:HGNC:3776]
AGMO	HGNC Symbol	alkylglycerol monooxygenase [Source:HGNC Symbol;Acc:HGNC:33784]	oxidation-reduction process
AGMO	HGNC Symbol	alkylglycerol monooxygenase [Source:HGNC Symbol;Acc:HGNC:33784]	oxidoreductase activity
AGMO	HGNC Symbol	alkylglycerol monooxygenase [Source:HGNC Symbol;Acc:HGNC:33784]	iron ion binding
AGMO	HGNC Symbol	alkylglycerol monooxygenase [Source:HGNC Symbol;Acc:HGNC:33784]	lipid biosynthetic process
AGMO	HGNC Symbol	alkylglycerol monooxygenase [Source:HGNC Symbol;Acc:HGNC:33784]	membrane
AGMO	HGNC Symbol	alkylglycerol monooxygenase [Source:HGNC Symbol;Acc:HGNC:33784]	integral component of membrane
AGMO	HGNC Symbol	alkylglycerol monooxygenase [Source:HGNC Symbol;Acc:HGNC:33784]	endoplasmic reticulum
AGMO	HGNC Symbol	alkylglycerol monooxygenase [Source:HGNC Symbol;Acc:HGNC:33784]	endoplasmic reticulum membrane
AGMO	HGNC Symbol	alkylglycerol monooxygenase [Source:HGNC Symbol;Acc:HGNC:33784]	monooxygenase activity
AGMO	HGNC Symbol	alkylglycerol monooxygenase [Source:HGNC Symbol;Acc:HGNC:33784]	protein binding
AGMO	HGNC Symbol	alkylglycerol monooxygenase [Source:HGNC Symbol;Acc:HGNC:33784]	triglyceride biosynthetic process
AGMO	HGNC Symbol	alkylglycerol monooxygenase [Source:HGNC Symbol;Acc:HGNC:33784]	ether lipid metabolic process
AGMO	HGNC Symbol	alkylglycerol monooxygenase [Source:HGNC Symbol;Acc:HGNC:33784]	glyceryl-ether monooxygenase activity
AGMO	HGNC Symbol	alkylglycerol monooxygenase [Source:HGNC Symbol;Acc:HGNC:33784]	membrane lipid metabolic process
AGMO	HGNC Symbol	alkylglycerol monooxygenase [Source:HGNC Symbol;Acc:HGNC:33784]
AGTR2	HGNC Symbol	angiotensin II receptor type 2 [Source:HGNC Symbol;Acc:HGNC:338]	G protein-coupled receptor signaling pathway
AGTR2	HGNC Symbol	angiotensin II receptor type 2 [Source:HGNC Symbol;Acc:HGNC:338]	integral component of membrane
AGTR2	HGNC Symbol	angiotensin II receptor type 2 [Source:HGNC Symbol;Acc:HGNC:338]	G protein-coupled receptor activity
AGTR2	HGNC Symbol	angiotensin II receptor type 2 [Source:HGNC Symbol;Acc:HGNC:338]	angiotensin type II receptor activity
AGTR2	HGNC Symbol	angiotensin II receptor type 2 [Source:HGNC Symbol;Acc:HGNC:338]	inflammatory response
AGTR2	HGNC Symbol	angiotensin II receptor type 2 [Source:HGNC Symbol;Acc:HGNC:338]	regulation of apoptotic process
AGTR2	HGNC Symbol	angiotensin II receptor type 2 [Source:HGNC Symbol;Acc:HGNC:338]	regulation of blood vessel diameter
AGTR2	HGNC Symbol	angiotensin II receptor type 2 [Source:HGNC Symbol;Acc:HGNC:338]	negative regulation of blood vessel endothelial cell migration
AGTR2	HGNC Symbol	angiotensin II receptor type 2 [Source:HGNC Symbol;Acc:HGNC:338]	negative regulation of heart rate
AGTR2	HGNC Symbol	angiotensin II receptor type 2 [Source:HGNC Symbol;Acc:HGNC:338]	positive regulation of nitric oxide biosynthetic process
AGTR2	HGNC Symbol	angiotensin II receptor type 2 [Source:HGNC Symbol;Acc:HGNC:338]	membrane
AGTR2	HGNC Symbol	angiotensin II receptor type 2 [Source:HGNC Symbol;Acc:HGNC:338]	plasma membrane
AGTR2	HGNC Symbol	angiotensin II receptor type 2 [Source:HGNC Symbol;Acc:HGNC:338]	protein binding
AGTR2	HGNC Symbol	angiotensin II receptor type 2 [Source:HGNC Symbol;Acc:HGNC:338]	signal transduction
AGTR2	HGNC Symbol	angiotensin II receptor type 2 [Source:HGNC Symbol;Acc:HGNC:338]	angiotensin-activated signaling pathway
AGTR2	HGNC Symbol	angiotensin II receptor type 2 [Source:HGNC Symbol;Acc:HGNC:338]	negative regulation of signaling receptor activity
AGTR2	HGNC Symbol	angiotensin II receptor type 2 [Source:HGNC Symbol;Acc:HGNC:338]	integral component of plasma membrane
AGTR2	HGNC Symbol	angiotensin II receptor type 2 [Source:HGNC Symbol;Acc:HGNC:338]	cell surface receptor signaling pathway
AGTR2	HGNC Symbol	angiotensin II receptor type 2 [Source:HGNC Symbol;Acc:HGNC:338]	positive regulation of nitric-oxide synthase activity
AGTR2	HGNC Symbol	angiotensin II receptor type 2 [Source:HGNC Symbol;Acc:HGNC:338]	negative regulation of cell growth
AGTR2	HGNC Symbol	angiotensin II receptor type 2 [Source:HGNC Symbol;Acc:HGNC:338]	intracellular signal transduction
AGTR2	HGNC Symbol	angiotensin II receptor type 2 [Source:HGNC Symbol;Acc:HGNC:338]	receptor antagonist activity
AGTR2	HGNC Symbol	angiotensin II receptor type 2 [Source:HGNC Symbol;Acc:HGNC:338]	regulation of blood pressure
AGTR2	HGNC Symbol	angiotensin II receptor type 2 [Source:HGNC Symbol;Acc:HGNC:338]	blood vessel remodeling
AGTR2	HGNC Symbol	angiotensin II receptor type 2 [Source:HGNC Symbol;Acc:HGNC:338]	G protein-coupled receptor signaling pathway coupled to cGMP nucleotide second messenger
AGTR2	HGNC Symbol	angiotensin II receptor type 2 [Source:HGNC Symbol;Acc:HGNC:338]	nitric oxide mediated signal transduction
AGTR2	HGNC Symbol	angiotensin II receptor type 2 [Source:HGNC Symbol;Acc:HGNC:338]	negative regulation of neurotrophin TRK receptor signaling pathway
AGTR2	HGNC Symbol	angiotensin II receptor type 2 [Source:HGNC Symbol;Acc:HGNC:338]	positive regulation of extrinsic apoptotic signaling pathway
AGTR2	HGNC Symbol	angiotensin II receptor type 2 [Source:HGNC Symbol;Acc:HGNC:338]	positive regulation of blood vessel diameter
AGTR2	HGNC Symbol	angiotensin II receptor type 2 [Source:HGNC Symbol;Acc:HGNC:338]	brain development
AGTR2	HGNC Symbol	angiotensin II receptor type 2 [Source:HGNC Symbol;Acc:HGNC:338]	positive regulation of phosphoprotein phosphatase activity
AGTR2	HGNC Symbol	angiotensin II receptor type 2 [Source:HGNC Symbol;Acc:HGNC:338]	vasodilation
AGTR2	HGNC Symbol	angiotensin II receptor type 2 [Source:HGNC Symbol;Acc:HGNC:338]	transcription factor binding
AGTR2	HGNC Symbol	angiotensin II receptor type 2 [Source:HGNC Symbol;Acc:HGNC:338]	kidney development
AGTR2	HGNC Symbol	angiotensin II receptor type 2 [Source:HGNC Symbol;Acc:HGNC:338]	regulation of systemic arterial blood pressure by circulatory renin-angiotensin
AGTR2	HGNC Symbol	angiotensin II receptor type 2 [Source:HGNC Symbol;Acc:HGNC:338]	renin-angiotensin regulation of aldosterone production
AGTR2	HGNC Symbol	angiotensin II receptor type 2 [Source:HGNC Symbol;Acc:HGNC:338]	angiotensin-mediated vasodilation involved in regulation of systemic arterial blood pressure
AGTR2	HGNC Symbol	angiotensin II receptor type 2 [Source:HGNC Symbol;Acc:HGNC:338]	brain renin-angiotensin system
AGTR2	HGNC Symbol	angiotensin II receptor type 2 [Source:HGNC Symbol;Acc:HGNC:338]	cellular sodium ion homeostasis
AGTR2	HGNC Symbol	angiotensin II receptor type 2 [Source:HGNC Symbol;Acc:HGNC:338]	positive regulation of cell population proliferation
AGTR2	HGNC Symbol	angiotensin II receptor type 2 [Source:HGNC Symbol;Acc:HGNC:338]	response to organonitrogen compound
AGTR2	HGNC Symbol	angiotensin II receptor type 2 [Source:HGNC Symbol;Acc:HGNC:338]	negative regulation of norepinephrine secretion
AGTR2	HGNC Symbol	angiotensin II receptor type 2 [Source:HGNC Symbol;Acc:HGNC:338]	cerebellar cortex development
AGTR2	HGNC Symbol	angiotensin II receptor type 2 [Source:HGNC Symbol;Acc:HGNC:338]	negative regulation of icosanoid secretion
AGTR2	HGNC Symbol	angiotensin II receptor type 2 [Source:HGNC Symbol;Acc:HGNC:338]	regulation of metanephros size
AGTR2	HGNC Symbol	angiotensin II receptor type 2 [Source:HGNC Symbol;Acc:HGNC:338]	exploration behavior
AGTR2	HGNC Symbol	angiotensin II receptor type 2 [Source:HGNC Symbol;Acc:HGNC:338]	positive regulation of renal sodium excretion
AGTR2	HGNC Symbol	angiotensin II receptor type 2 [Source:HGNC Symbol;Acc:HGNC:338]	aldosterone secretion
AGTR2	HGNC Symbol	angiotensin II receptor type 2 [Source:HGNC Symbol;Acc:HGNC:338]	regulation of protein import into nucleus
AGTR2	HGNC Symbol	angiotensin II receptor type 2 [Source:HGNC Symbol;Acc:HGNC:338]	dopamine biosynthetic process
AGTR2	HGNC Symbol	angiotensin II receptor type 2 [Source:HGNC Symbol;Acc:HGNC:338]	positive regulation of transcription, DNA-templated
AGTR2	HGNC Symbol	angiotensin II receptor type 2 [Source:HGNC Symbol;Acc:HGNC:338]	negative regulation of fibroblast proliferation
AGTR2	HGNC Symbol	angiotensin II receptor type 2 [Source:HGNC Symbol;Acc:HGNC:338]	positive regulation of cytokine secretion
AGTR2	HGNC Symbol	angiotensin II receptor type 2 [Source:HGNC Symbol;Acc:HGNC:338]	kidney morphogenesis
AGTR2	HGNC Symbol	angiotensin II receptor type 2 [Source:HGNC Symbol;Acc:HGNC:338]	cell growth involved in cardiac muscle cell development
AGTR2	HGNC Symbol	angiotensin II receptor type 2 [Source:HGNC Symbol;Acc:HGNC:338]	cellular response to dexamethasone stimulus
AGTR2	HGNC Symbol	angiotensin II receptor type 2 [Source:HGNC Symbol;Acc:HGNC:338]	positive regulation of metanephric glomerulus development
AGTR2	HGNC Symbol	angiotensin II receptor type 2 [Source:HGNC Symbol;Acc:HGNC:338]	positive regulation of branching involved in ureteric bud morphogenesis
AGTR2	HGNC Symbol	angiotensin II receptor type 2 [Source:HGNC Symbol;Acc:HGNC:338]	perinuclear region of cytoplasm
AHNAK	HGNC Symbol	AHNAK nucleoprotein [Source:HGNC Symbol;Acc:HGNC:347]	protein binding
AHNAK	HGNC Symbol	AHNAK nucleoprotein [Source:HGNC Symbol;Acc:HGNC:347]	nucleus
AHNAK	HGNC Symbol	AHNAK nucleoprotein [Source:HGNC Symbol;Acc:HGNC:347]	RNA binding
AHNAK	HGNC Symbol	AHNAK nucleoprotein [Source:HGNC Symbol;Acc:HGNC:347]	cytoplasm
AHNAK	HGNC Symbol	AHNAK nucleoprotein [Source:HGNC Symbol;Acc:HGNC:347]	membrane
AHNAK	HGNC Symbol	AHNAK nucleoprotein [Source:HGNC Symbol;Acc:HGNC:347]	cytosol
AHNAK	HGNC Symbol	AHNAK nucleoprotein [Source:HGNC Symbol;Acc:HGNC:347]	plasma membrane
AHNAK	HGNC Symbol	AHNAK nucleoprotein [Source:HGNC Symbol;Acc:HGNC:347]	lysosomal membrane
AHNAK	HGNC Symbol	AHNAK nucleoprotein [Source:HGNC Symbol;Acc:HGNC:347]	focal adhesion
AHNAK	HGNC Symbol	AHNAK nucleoprotein [Source:HGNC Symbol;Acc:HGNC:347]	sarcolemma
AHNAK	HGNC Symbol	AHNAK nucleoprotein [Source:HGNC Symbol;Acc:HGNC:347]	membrane raft
AHNAK	HGNC Symbol	AHNAK nucleoprotein [Source:HGNC Symbol;Acc:HGNC:347]	identical protein binding
AHNAK	HGNC Symbol	AHNAK nucleoprotein [Source:HGNC Symbol;Acc:HGNC:347]	cadherin binding
AHNAK	HGNC Symbol	AHNAK nucleoprotein [Source:HGNC Symbol;Acc:HGNC:347]	extracellular exosome
AHNAK	HGNC Symbol	AHNAK nucleoprotein [Source:HGNC Symbol;Acc:HGNC:347]	regulation of RNA splicing
AHNAK	HGNC Symbol	AHNAK nucleoprotein [Source:HGNC Symbol;Acc:HGNC:347]	T-tubule
AHNAK	HGNC Symbol	AHNAK nucleoprotein [Source:HGNC Symbol;Acc:HGNC:347]	vesicle
AHNAK	HGNC Symbol	AHNAK nucleoprotein [Source:HGNC Symbol;Acc:HGNC:347]	regulation of voltage-gated calcium channel activity
AHNAK	HGNC Symbol	AHNAK nucleoprotein [Source:HGNC Symbol;Acc:HGNC:347]	S100 protein binding
AHNAK	HGNC Symbol	AHNAK nucleoprotein [Source:HGNC Symbol;Acc:HGNC:347]	actin cytoskeleton
AHNAK	HGNC Symbol	AHNAK nucleoprotein [Source:HGNC Symbol;Acc:HGNC:347]	costamere
AHNAK	HGNC Symbol	AHNAK nucleoprotein [Source:HGNC Symbol;Acc:HGNC:347]	cell-cell contact zone
AHNAK	HGNC Symbol	AHNAK nucleoprotein [Source:HGNC Symbol;Acc:HGNC:347]	structural molecule activity conferring elasticity
AHNAK	HGNC Symbol	AHNAK nucleoprotein [Source:HGNC Symbol;Acc:HGNC:347]
AHNAK2	HGNC Symbol	AHNAK nucleoprotein 2 [Source:HGNC Symbol;Acc:HGNC:20125]
AHNAK2	HGNC Symbol	AHNAK nucleoprotein 2 [Source:HGNC Symbol;Acc:HGNC:20125]	nucleus
AHNAK2	HGNC Symbol	AHNAK nucleoprotein 2 [Source:HGNC Symbol;Acc:HGNC:20125]	cytoplasm
AHNAK2	HGNC Symbol	AHNAK nucleoprotein 2 [Source:HGNC Symbol;Acc:HGNC:20125]	cytosol
AHNAK2	HGNC Symbol	AHNAK nucleoprotein 2 [Source:HGNC Symbol;Acc:HGNC:20125]	plasma membrane
AHNAK2	HGNC Symbol	AHNAK nucleoprotein 2 [Source:HGNC Symbol;Acc:HGNC:20125]	sarcolemma
AHNAK2	HGNC Symbol	AHNAK nucleoprotein 2 [Source:HGNC Symbol;Acc:HGNC:20125]	protein binding
AHNAK2	HGNC Symbol	AHNAK nucleoprotein 2 [Source:HGNC Symbol;Acc:HGNC:20125]	cytoplasmic vesicle membrane
AHNAK2	HGNC Symbol	AHNAK nucleoprotein 2 [Source:HGNC Symbol;Acc:HGNC:20125]	Z disc
AHNAK2	HGNC Symbol	AHNAK nucleoprotein 2 [Source:HGNC Symbol;Acc:HGNC:20125]	regulation of RNA splicing
AHNAK2	HGNC Symbol	AHNAK nucleoprotein 2 [Source:HGNC Symbol;Acc:HGNC:20125]	T-tubule
AHNAK2	HGNC Symbol	AHNAK nucleoprotein 2 [Source:HGNC Symbol;Acc:HGNC:20125]	costamere
AKAP9	HGNC Symbol	A-kinase anchoring protein 9 [Source:HGNC Symbol;Acc:HGNC:379]	DNA binding
AKAP9	HGNC Symbol	A-kinase anchoring protein 9 [Source:HGNC Symbol;Acc:HGNC:379]	signal transduction
AKAP9	HGNC Symbol	A-kinase anchoring protein 9 [Source:HGNC Symbol;Acc:HGNC:379]	molecular adaptor activity
AKAP9	HGNC Symbol	A-kinase anchoring protein 9 [Source:HGNC Symbol;Acc:HGNC:379]	regulation of ventricular cardiac muscle cell membrane repolarization
AKAP9	HGNC Symbol	A-kinase anchoring protein 9 [Source:HGNC Symbol;Acc:HGNC:379]	cytoplasm
AKAP9	HGNC Symbol	A-kinase anchoring protein 9 [Source:HGNC Symbol;Acc:HGNC:379]	Golgi apparatus
AKAP9	HGNC Symbol	A-kinase anchoring protein 9 [Source:HGNC Symbol;Acc:HGNC:379]	intracellular membrane-bounded organelle
AKAP9	HGNC Symbol	A-kinase anchoring protein 9 [Source:HGNC Symbol;Acc:HGNC:379]	cytoskeleton
AKAP9	HGNC Symbol	A-kinase anchoring protein 9 [Source:HGNC Symbol;Acc:HGNC:379]	centrosome
AKAP9	HGNC Symbol	A-kinase anchoring protein 9 [Source:HGNC Symbol;Acc:HGNC:379]	protein binding
AKAP9	HGNC Symbol	A-kinase anchoring protein 9 [Source:HGNC Symbol;Acc:HGNC:379]	microtubule organizing center
AKAP9	HGNC Symbol	A-kinase anchoring protein 9 [Source:HGNC Symbol;Acc:HGNC:379]	Golgi stack
AKAP9	HGNC Symbol	A-kinase anchoring protein 9 [Source:HGNC Symbol;Acc:HGNC:379]	potassium channel regulator activity
AKAP9	HGNC Symbol	A-kinase anchoring protein 9 [Source:HGNC Symbol;Acc:HGNC:379]	cytosol
AKAP9	HGNC Symbol	A-kinase anchoring protein 9 [Source:HGNC Symbol;Acc:HGNC:379]	cis-Golgi network
AKAP9	HGNC Symbol	A-kinase anchoring protein 9 [Source:HGNC Symbol;Acc:HGNC:379]	G2/M transition of mitotic cell cycle
AKAP9	HGNC Symbol	A-kinase anchoring protein 9 [Source:HGNC Symbol;Acc:HGNC:379]	regulation of G2/M transition of mitotic cell cycle
AKAP9	HGNC Symbol	A-kinase anchoring protein 9 [Source:HGNC Symbol;Acc:HGNC:379]	ciliary basal body-plasma membrane docking
AKAP9	HGNC Symbol	A-kinase anchoring protein 9 [Source:HGNC Symbol;Acc:HGNC:379]	positive regulation of peptidyl-serine phosphorylation
AKAP9	HGNC Symbol	A-kinase anchoring protein 9 [Source:HGNC Symbol;Acc:HGNC:379]	ion channel binding
AKAP9	HGNC Symbol	A-kinase anchoring protein 9 [Source:HGNC Symbol;Acc:HGNC:379]	cardiac conduction
AKAP9	HGNC Symbol	A-kinase anchoring protein 9 [Source:HGNC Symbol;Acc:HGNC:379]	signaling receptor binding
AKAP9	HGNC Symbol	A-kinase anchoring protein 9 [Source:HGNC Symbol;Acc:HGNC:379]	synaptic membrane
AKAP9	HGNC Symbol	A-kinase anchoring protein 9 [Source:HGNC Symbol;Acc:HGNC:379]	chemical synaptic transmission
AKAP9	HGNC Symbol	A-kinase anchoring protein 9 [Source:HGNC Symbol;Acc:HGNC:379]	glutamatergic synapse
AKAP9	HGNC Symbol	A-kinase anchoring protein 9 [Source:HGNC Symbol;Acc:HGNC:379]	regulation of membrane repolarization
AKAP9	HGNC Symbol	A-kinase anchoring protein 9 [Source:HGNC Symbol;Acc:HGNC:379]	voltage-gated potassium channel complex
AKAP9	HGNC Symbol	A-kinase anchoring protein 9 [Source:HGNC Symbol;Acc:HGNC:379]	protein kinase A regulatory subunit binding
AKAP9	HGNC Symbol	A-kinase anchoring protein 9 [Source:HGNC Symbol;Acc:HGNC:379]	regulation of heart rate by cardiac conduction
AKAP9	HGNC Symbol	A-kinase anchoring protein 9 [Source:HGNC Symbol;Acc:HGNC:379]	cellular response to cAMP
AKAP9	HGNC Symbol	A-kinase anchoring protein 9 [Source:HGNC Symbol;Acc:HGNC:379]	microtubule nucleation
AKAP9	HGNC Symbol	A-kinase anchoring protein 9 [Source:HGNC Symbol;Acc:HGNC:379]	regulation of postsynaptic neurotransmitter receptor activity
AKAP9	HGNC Symbol	A-kinase anchoring protein 9 [Source:HGNC Symbol;Acc:HGNC:379]	positive regulation of potassium ion transmembrane transporter activity
AKAP9	HGNC Symbol	A-kinase anchoring protein 9 [Source:HGNC Symbol;Acc:HGNC:379]	positive regulation of microtubule polymerization
AKAP9	HGNC Symbol	A-kinase anchoring protein 9 [Source:HGNC Symbol;Acc:HGNC:379]	regulation of cardiac muscle cell action potential involved in regulation of contraction
AKAP9	HGNC Symbol	A-kinase anchoring protein 9 [Source:HGNC Symbol;Acc:HGNC:379]	maintenance of centrosome location
AKAP9	HGNC Symbol	A-kinase anchoring protein 9 [Source:HGNC Symbol;Acc:HGNC:379]	regulation of Golgi organization
AKAP9	HGNC Symbol	A-kinase anchoring protein 9 [Source:HGNC Symbol;Acc:HGNC:379]
AKAP9	HGNC Symbol	A-kinase anchoring protein 9 [Source:HGNC Symbol;Acc:HGNC:379]	kinase activity
AKAP9	HGNC Symbol	A-kinase anchoring protein 9 [Source:HGNC Symbol;Acc:HGNC:379]	phosphorylation
AKAP9	HGNC Symbol	A-kinase anchoring protein 9 [Source:HGNC Symbol;Acc:HGNC:379]	negative regulation of adenylate cyclase activity
AKAP9	HGNC Symbol	A-kinase anchoring protein 9 [Source:HGNC Symbol;Acc:HGNC:379]	response to electrical stimulus
AKAP9	HGNC Symbol	A-kinase anchoring protein 9 [Source:HGNC Symbol;Acc:HGNC:379]	neuronal cell body
AKAP9	HGNC Symbol	A-kinase anchoring protein 9 [Source:HGNC Symbol;Acc:HGNC:379]	dendritic branch
AKAP9	HGNC Symbol	A-kinase anchoring protein 9 [Source:HGNC Symbol;Acc:HGNC:379]	extrinsic component of postsynaptic density membrane
AKT1	HGNC Symbol	AKT serine/threonine kinase 1 [Source:HGNC Symbol;Acc:HGNC:391]	ATP binding
AKT1	HGNC Symbol	AKT serine/threonine kinase 1 [Source:HGNC Symbol;Acc:HGNC:391]	protein phosphorylation
AKT1	HGNC Symbol	AKT serine/threonine kinase 1 [Source:HGNC Symbol;Acc:HGNC:391]	protein serine/threonine kinase activity
AKT1	HGNC Symbol	AKT serine/threonine kinase 1 [Source:HGNC Symbol;Acc:HGNC:391]	protein kinase activity
AKT1	HGNC Symbol	AKT serine/threonine kinase 1 [Source:HGNC Symbol;Acc:HGNC:391]	protein kinase B signaling
AKT1	HGNC Symbol	AKT serine/threonine kinase 1 [Source:HGNC Symbol;Acc:HGNC:391]	positive regulation of gene expression
AKT1	HGNC Symbol	AKT serine/threonine kinase 1 [Source:HGNC Symbol;Acc:HGNC:391]	positive regulation of G1/S transition of mitotic cell cycle
AKT1	HGNC Symbol	AKT serine/threonine kinase 1 [Source:HGNC Symbol;Acc:HGNC:391]	positive regulation of endothelial cell migration
AKT1	HGNC Symbol	AKT serine/threonine kinase 1 [Source:HGNC Symbol;Acc:HGNC:391]	positive regulation of glucose import
AKT1	HGNC Symbol	AKT serine/threonine kinase 1 [Source:HGNC Symbol;Acc:HGNC:391]	positive regulation of protein localization to plasma membrane
AKT1	HGNC Symbol	AKT serine/threonine kinase 1 [Source:HGNC Symbol;Acc:HGNC:391]	positive regulation of DNA-binding transcription factor activity
AKT1	HGNC Symbol	AKT serine/threonine kinase 1 [Source:HGNC Symbol;Acc:HGNC:391]	positive regulation of nitric oxide biosynthetic process
AKT1	HGNC Symbol	AKT serine/threonine kinase 1 [Source:HGNC Symbol;Acc:HGNC:391]	positive regulation of protein phosphorylation
AKT1	HGNC Symbol	AKT serine/threonine kinase 1 [Source:HGNC Symbol;Acc:HGNC:391]	positive regulation of fat cell differentiation
AKT1	HGNC Symbol	AKT serine/threonine kinase 1 [Source:HGNC Symbol;Acc:HGNC:391]	negative regulation of protein serine/threonine kinase activity
AKT1	HGNC Symbol	AKT serine/threonine kinase 1 [Source:HGNC Symbol;Acc:HGNC:391]	negative regulation of autophagy
AKT1	HGNC Symbol	AKT serine/threonine kinase 1 [Source:HGNC Symbol;Acc:HGNC:391]	cellular response to insulin stimulus
AKT1	HGNC Symbol	AKT serine/threonine kinase 1 [Source:HGNC Symbol;Acc:HGNC:391]	negative regulation of protein kinase activity
AKT1	HGNC Symbol	AKT serine/threonine kinase 1 [Source:HGNC Symbol;Acc:HGNC:391]	nucleus
AKT1	HGNC Symbol	AKT serine/threonine kinase 1 [Source:HGNC Symbol;Acc:HGNC:391]	cytoplasm
AKT1	HGNC Symbol	AKT serine/threonine kinase 1 [Source:HGNC Symbol;Acc:HGNC:391]	membrane
AKT1	HGNC Symbol	AKT serine/threonine kinase 1 [Source:HGNC Symbol;Acc:HGNC:391]	nucleotide binding
AKT1	HGNC Symbol	AKT serine/threonine kinase 1 [Source:HGNC Symbol;Acc:HGNC:391]	kinase activity
AKT1	HGNC Symbol	AKT serine/threonine kinase 1 [Source:HGNC Symbol;Acc:HGNC:391]	transferase activity
AKT1	HGNC Symbol	AKT serine/threonine kinase 1 [Source:HGNC Symbol;Acc:HGNC:391]
AKT1	HGNC Symbol	AKT serine/threonine kinase 1 [Source:HGNC Symbol;Acc:HGNC:391]	phosphorylation
AKT1	HGNC Symbol	AKT serine/threonine kinase 1 [Source:HGNC Symbol;Acc:HGNC:391]	negative regulation of apoptotic process
AKT1	HGNC Symbol	AKT serine/threonine kinase 1 [Source:HGNC Symbol;Acc:HGNC:391]	nucleoplasm
AKT1	HGNC Symbol	AKT serine/threonine kinase 1 [Source:HGNC Symbol;Acc:HGNC:391]	plasma membrane
AKT1	HGNC Symbol	AKT serine/threonine kinase 1 [Source:HGNC Symbol;Acc:HGNC:391]	apoptotic process
AKT1	HGNC Symbol	AKT serine/threonine kinase 1 [Source:HGNC Symbol;Acc:HGNC:391]	regulation of translation
AKT1	HGNC Symbol	AKT serine/threonine kinase 1 [Source:HGNC Symbol;Acc:HGNC:391]	cytosol
AKT1	HGNC Symbol	AKT serine/threonine kinase 1 [Source:HGNC Symbol;Acc:HGNC:391]	multicellular organism development
AKT1	HGNC Symbol	AKT serine/threonine kinase 1 [Source:HGNC Symbol;Acc:HGNC:391]	cell differentiation
AKT1	HGNC Symbol	AKT serine/threonine kinase 1 [Source:HGNC Symbol;Acc:HGNC:391]	protein homodimerization activity
AKT1	HGNC Symbol	AKT serine/threonine kinase 1 [Source:HGNC Symbol;Acc:HGNC:391]	carbohydrate metabolic process
AKT1	HGNC Symbol	AKT serine/threonine kinase 1 [Source:HGNC Symbol;Acc:HGNC:391]	glycogen metabolic process
AKT1	HGNC Symbol	AKT serine/threonine kinase 1 [Source:HGNC Symbol;Acc:HGNC:391]	microtubule cytoskeleton
AKT1	HGNC Symbol	AKT serine/threonine kinase 1 [Source:HGNC Symbol;Acc:HGNC:391]	protein binding
AKT1	HGNC Symbol	AKT serine/threonine kinase 1 [Source:HGNC Symbol;Acc:HGNC:391]	signal transduction
AKT1	HGNC Symbol	AKT serine/threonine kinase 1 [Source:HGNC Symbol;Acc:HGNC:391]	nervous system development
AKT1	HGNC Symbol	AKT serine/threonine kinase 1 [Source:HGNC Symbol;Acc:HGNC:391]	carbohydrate transport
AKT1	HGNC Symbol	AKT serine/threonine kinase 1 [Source:HGNC Symbol;Acc:HGNC:391]	identical protein binding
AKT1	HGNC Symbol	AKT serine/threonine kinase 1 [Source:HGNC Symbol;Acc:HGNC:391]	calmodulin binding
AKT1	HGNC Symbol	AKT serine/threonine kinase 1 [Source:HGNC Symbol;Acc:HGNC:391]	postsynapse
AKT1	HGNC Symbol	AKT serine/threonine kinase 1 [Source:HGNC Symbol;Acc:HGNC:391]	intracellular signal transduction
AKT1	HGNC Symbol	AKT serine/threonine kinase 1 [Source:HGNC Symbol;Acc:HGNC:391]	glycogen biosynthetic process
AKT1	HGNC Symbol	AKT serine/threonine kinase 1 [Source:HGNC Symbol;Acc:HGNC:391]	glucose metabolic process
AKT1	HGNC Symbol	AKT serine/threonine kinase 1 [Source:HGNC Symbol;Acc:HGNC:391]	positive regulation of peptidyl-serine phosphorylation
AKT1	HGNC Symbol	AKT serine/threonine kinase 1 [Source:HGNC Symbol;Acc:HGNC:391]	regulation of mRNA stability
AKT1	HGNC Symbol	AKT serine/threonine kinase 1 [Source:HGNC Symbol;Acc:HGNC:391]	protein-containing complex
AKT1	HGNC Symbol	AKT serine/threonine kinase 1 [Source:HGNC Symbol;Acc:HGNC:391]	cellular response to tumor necrosis factor
AKT1	HGNC Symbol	AKT serine/threonine kinase 1 [Source:HGNC Symbol;Acc:HGNC:391]	phosphatidylinositol-3,4,5-trisphosphate binding
AKT1	HGNC Symbol	AKT serine/threonine kinase 1 [Source:HGNC Symbol;Acc:HGNC:391]	phosphatidylinositol-3,4-bisphosphate binding
AKT1	HGNC Symbol	AKT serine/threonine kinase 1 [Source:HGNC Symbol;Acc:HGNC:391]	protein kinase C binding
AKT1	HGNC Symbol	AKT serine/threonine kinase 1 [Source:HGNC Symbol;Acc:HGNC:391]	enzyme binding
AKT1	HGNC Symbol	AKT serine/threonine kinase 1 [Source:HGNC Symbol;Acc:HGNC:391]	protein kinase binding
AKT1	HGNC Symbol	AKT serine/threonine kinase 1 [Source:HGNC Symbol;Acc:HGNC:391]	GTPase activating protein binding
AKT1	HGNC Symbol	AKT serine/threonine kinase 1 [Source:HGNC Symbol;Acc:HGNC:391]	protein phosphatase 2A binding
AKT1	HGNC Symbol	AKT serine/threonine kinase 1 [Source:HGNC Symbol;Acc:HGNC:391]	osteoblast differentiation
AKT1	HGNC Symbol	AKT serine/threonine kinase 1 [Source:HGNC Symbol;Acc:HGNC:391]	maternal placenta development
AKT1	HGNC Symbol	AKT serine/threonine kinase 1 [Source:HGNC Symbol;Acc:HGNC:391]	translation
AKT1	HGNC Symbol	AKT serine/threonine kinase 1 [Source:HGNC Symbol;Acc:HGNC:391]	inflammatory response
AKT1	HGNC Symbol	AKT serine/threonine kinase 1 [Source:HGNC Symbol;Acc:HGNC:391]	cellular response to DNA damage stimulus
AKT1	HGNC Symbol	AKT serine/threonine kinase 1 [Source:HGNC Symbol;Acc:HGNC:391]	germ cell development
AKT1	HGNC Symbol	AKT serine/threonine kinase 1 [Source:HGNC Symbol;Acc:HGNC:391]	aging
AKT1	HGNC Symbol	AKT serine/threonine kinase 1 [Source:HGNC Symbol;Acc:HGNC:391]	insulin receptor signaling pathway
AKT1	HGNC Symbol	AKT serine/threonine kinase 1 [Source:HGNC Symbol;Acc:HGNC:391]	apoptotic mitochondrial changes
AKT1	HGNC Symbol	AKT serine/threonine kinase 1 [Source:HGNC Symbol;Acc:HGNC:391]	response to hormone
AKT1	HGNC Symbol	AKT serine/threonine kinase 1 [Source:HGNC Symbol;Acc:HGNC:391]	response to organic substance
AKT1	HGNC Symbol	AKT serine/threonine kinase 1 [Source:HGNC Symbol;Acc:HGNC:391]	gene expression
AKT1	HGNC Symbol	AKT serine/threonine kinase 1 [Source:HGNC Symbol;Acc:HGNC:391]	negative regulation of gene expression
AKT1	HGNC Symbol	AKT serine/threonine kinase 1 [Source:HGNC Symbol;Acc:HGNC:391]	positive regulation of fibroblast migration
AKT1	HGNC Symbol	AKT serine/threonine kinase 1 [Source:HGNC Symbol;Acc:HGNC:391]	positive regulation of sodium ion transport
AKT1	HGNC Symbol	AKT serine/threonine kinase 1 [Source:HGNC Symbol;Acc:HGNC:391]	regulation of neuron projection development
AKT1	HGNC Symbol	AKT serine/threonine kinase 1 [Source:HGNC Symbol;Acc:HGNC:391]	protein ubiquitination
AKT1	HGNC Symbol	AKT serine/threonine kinase 1 [Source:HGNC Symbol;Acc:HGNC:391]	peptidyl-serine phosphorylation
AKT1	HGNC Symbol	AKT serine/threonine kinase 1 [Source:HGNC Symbol;Acc:HGNC:391]	spinal cord development
AKT1	HGNC Symbol	AKT serine/threonine kinase 1 [Source:HGNC Symbol;Acc:HGNC:391]	cell projection organization
AKT1	HGNC Symbol	AKT serine/threonine kinase 1 [Source:HGNC Symbol;Acc:HGNC:391]	protein catabolic process
AKT1	HGNC Symbol	AKT serine/threonine kinase 1 [Source:HGNC Symbol;Acc:HGNC:391]	hyaluronan metabolic process
AKT1	HGNC Symbol	AKT serine/threonine kinase 1 [Source:HGNC Symbol;Acc:HGNC:391]	positive regulation of cell growth
AKT1	HGNC Symbol	AKT serine/threonine kinase 1 [Source:HGNC Symbol;Acc:HGNC:391]	regulation of cell migration
AKT1	HGNC Symbol	AKT serine/threonine kinase 1 [Source:HGNC Symbol;Acc:HGNC:391]	regulation of myelination
AKT1	HGNC Symbol	AKT serine/threonine kinase 1 [Source:HGNC Symbol;Acc:HGNC:391]	lipopolysaccharide-mediated signaling pathway
AKT1	HGNC Symbol	AKT serine/threonine kinase 1 [Source:HGNC Symbol;Acc:HGNC:391]	response to food
AKT1	HGNC Symbol	AKT serine/threonine kinase 1 [Source:HGNC Symbol;Acc:HGNC:391]	positive regulation of cellular protein metabolic process
AKT1	HGNC Symbol	AKT serine/threonine kinase 1 [Source:HGNC Symbol;Acc:HGNC:391]	peripheral nervous system myelin maintenance
AKT1	HGNC Symbol	AKT serine/threonine kinase 1 [Source:HGNC Symbol;Acc:HGNC:391]	positive regulation of proteasomal ubiquitin-dependent protein catabolic process
AKT1	HGNC Symbol	AKT serine/threonine kinase 1 [Source:HGNC Symbol;Acc:HGNC:391]	regulation of protein localization
AKT1	HGNC Symbol	AKT serine/threonine kinase 1 [Source:HGNC Symbol;Acc:HGNC:391]	cellular response to vascular endothelial growth factor stimulus
AKT1	HGNC Symbol	AKT serine/threonine kinase 1 [Source:HGNC Symbol;Acc:HGNC:391]	cellular response to decreased oxygen levels
AKT1	HGNC Symbol	AKT serine/threonine kinase 1 [Source:HGNC Symbol;Acc:HGNC:391]	glucose homeostasis
AKT1	HGNC Symbol	AKT serine/threonine kinase 1 [Source:HGNC Symbol;Acc:HGNC:391]	regulation of apoptotic process
AKT1	HGNC Symbol	AKT serine/threonine kinase 1 [Source:HGNC Symbol;Acc:HGNC:391]	positive regulation of apoptotic process
AKT1	HGNC Symbol	AKT serine/threonine kinase 1 [Source:HGNC Symbol;Acc:HGNC:391]	negative regulation of cysteine-type endopeptidase activity involved in apoptotic process
AKT1	HGNC Symbol	AKT serine/threonine kinase 1 [Source:HGNC Symbol;Acc:HGNC:391]	negative regulation of cell size
AKT1	HGNC Symbol	AKT serine/threonine kinase 1 [Source:HGNC Symbol;Acc:HGNC:391]	positive regulation of vasoconstriction
AKT1	HGNC Symbol	AKT serine/threonine kinase 1 [Source:HGNC Symbol;Acc:HGNC:391]	positive regulation of transcription by RNA polymerase II
AKT1	HGNC Symbol	AKT serine/threonine kinase 1 [Source:HGNC Symbol;Acc:HGNC:391]	negative regulation of JNK cascade
AKT1	HGNC Symbol	AKT serine/threonine kinase 1 [Source:HGNC Symbol;Acc:HGNC:391]	positive regulation of organ growth
AKT1	HGNC Symbol	AKT serine/threonine kinase 1 [Source:HGNC Symbol;Acc:HGNC:391]	striated muscle cell differentiation
AKT1	HGNC Symbol	AKT serine/threonine kinase 1 [Source:HGNC Symbol;Acc:HGNC:391]	response to growth hormone
AKT1	HGNC Symbol	AKT serine/threonine kinase 1 [Source:HGNC Symbol;Acc:HGNC:391]	glycogen cell differentiation involved in embryonic placenta development
AKT1	HGNC Symbol	AKT serine/threonine kinase 1 [Source:HGNC Symbol;Acc:HGNC:391]	labyrinthine layer blood vessel development
AKT1	HGNC Symbol	AKT serine/threonine kinase 1 [Source:HGNC Symbol;Acc:HGNC:391]	cellular response to mechanical stimulus
AKT1	HGNC Symbol	AKT serine/threonine kinase 1 [Source:HGNC Symbol;Acc:HGNC:391]	cellular response to growth factor stimulus
AKT1	HGNC Symbol	AKT serine/threonine kinase 1 [Source:HGNC Symbol;Acc:HGNC:391]	cellular response to epidermal growth factor stimulus
AKT1	HGNC Symbol	AKT serine/threonine kinase 1 [Source:HGNC Symbol;Acc:HGNC:391]	cellular response to prostaglandin E stimulus
AKT1	HGNC Symbol	AKT serine/threonine kinase 1 [Source:HGNC Symbol;Acc:HGNC:391]	cellular response to organic cyclic compound
AKT1	HGNC Symbol	AKT serine/threonine kinase 1 [Source:HGNC Symbol;Acc:HGNC:391]	cellular response to hypoxia
AKT1	HGNC Symbol	AKT serine/threonine kinase 1 [Source:HGNC Symbol;Acc:HGNC:391]	negative regulation of release of cytochrome c from mitochondria
AKT1	HGNC Symbol	AKT serine/threonine kinase 1 [Source:HGNC Symbol;Acc:HGNC:391]	cellular response to granulocyte macrophage colony-stimulating factor stimulus
AKT1	HGNC Symbol	AKT serine/threonine kinase 1 [Source:HGNC Symbol;Acc:HGNC:391]	execution phase of apoptosis
AKT1	HGNC Symbol	AKT serine/threonine kinase 1 [Source:HGNC Symbol;Acc:HGNC:391]	cellular response to peptide
AKT1	HGNC Symbol	AKT serine/threonine kinase 1 [Source:HGNC Symbol;Acc:HGNC:391]	cellular response to nerve growth factor stimulus
AKT1	HGNC Symbol	AKT serine/threonine kinase 1 [Source:HGNC Symbol;Acc:HGNC:391]	response to insulin-like growth factor stimulus
AKT1	HGNC Symbol	AKT serine/threonine kinase 1 [Source:HGNC Symbol;Acc:HGNC:391]	positive regulation of protein localization to cell surface
AKT1	HGNC Symbol	AKT serine/threonine kinase 1 [Source:HGNC Symbol;Acc:HGNC:391]	negative regulation of intrinsic apoptotic signaling pathway
AKT1	HGNC Symbol	AKT serine/threonine kinase 1 [Source:HGNC Symbol;Acc:HGNC:391]	mitochondrion
AKT1	HGNC Symbol	AKT serine/threonine kinase 1 [Source:HGNC Symbol;Acc:HGNC:391]	spindle
AKT1	HGNC Symbol	AKT serine/threonine kinase 1 [Source:HGNC Symbol;Acc:HGNC:391]	cell-cell junction
AKT1	HGNC Symbol	AKT serine/threonine kinase 1 [Source:HGNC Symbol;Acc:HGNC:391]	ciliary basal body
AKT1	HGNC Symbol	AKT serine/threonine kinase 1 [Source:HGNC Symbol;Acc:HGNC:391]	protein import into nucleus
AKT1	HGNC Symbol	AKT serine/threonine kinase 1 [Source:HGNC Symbol;Acc:HGNC:391]	positive regulation of cell population proliferation
AKT1	HGNC Symbol	AKT serine/threonine kinase 1 [Source:HGNC Symbol;Acc:HGNC:391]	protein serine/threonine/tyrosine kinase activity
AKT1	HGNC Symbol	AKT serine/threonine kinase 1 [Source:HGNC Symbol;Acc:HGNC:391]	G protein-coupled receptor signaling pathway
AKT1	HGNC Symbol	AKT serine/threonine kinase 1 [Source:HGNC Symbol;Acc:HGNC:391]	lamellipodium
AKT1	HGNC Symbol	AKT serine/threonine kinase 1 [Source:HGNC Symbol;Acc:HGNC:391]	regulation of signal transduction by p53 class mediator
AKT1	HGNC Symbol	AKT serine/threonine kinase 1 [Source:HGNC Symbol;Acc:HGNC:391]	vesicle
AKT1	HGNC Symbol	AKT serine/threonine kinase 1 [Source:HGNC Symbol;Acc:HGNC:391]	negative regulation of Notch signaling pathway
AKT1	HGNC Symbol	AKT serine/threonine kinase 1 [Source:HGNC Symbol;Acc:HGNC:391]	phosphatidylinositol 3-kinase signaling
AKT1	HGNC Symbol	AKT serine/threonine kinase 1 [Source:HGNC Symbol;Acc:HGNC:391]	cytokine-mediated signaling pathway
AKT1	HGNC Symbol	AKT serine/threonine kinase 1 [Source:HGNC Symbol;Acc:HGNC:391]	regulation of nitric-oxide synthase activity
AKT1	HGNC Symbol	AKT serine/threonine kinase 1 [Source:HGNC Symbol;Acc:HGNC:391]	protein autophosphorylation
AKT1	HGNC Symbol	AKT serine/threonine kinase 1 [Source:HGNC Symbol;Acc:HGNC:391]	epidermal growth factor receptor signaling pathway
AKT1	HGNC Symbol	AKT serine/threonine kinase 1 [Source:HGNC Symbol;Acc:HGNC:391]	positive regulation of nitric-oxide synthase activity
AKT1	HGNC Symbol	AKT serine/threonine kinase 1 [Source:HGNC Symbol;Acc:HGNC:391]	negative regulation of extrinsic apoptotic signaling pathway in absence of ligand
AKT1	HGNC Symbol	AKT serine/threonine kinase 1 [Source:HGNC Symbol;Acc:HGNC:391]	peptidyl-threonine phosphorylation
AKT1	HGNC Symbol	AKT serine/threonine kinase 1 [Source:HGNC Symbol;Acc:HGNC:391]	cell migration involved in sprouting angiogenesis
AKT1	HGNC Symbol	AKT serine/threonine kinase 1 [Source:HGNC Symbol;Acc:HGNC:391]	mammary gland epithelial cell differentiation
AKT1	HGNC Symbol	AKT serine/threonine kinase 1 [Source:HGNC Symbol;Acc:HGNC:391]	14-3-3 protein binding
AKT1	HGNC Symbol	AKT serine/threonine kinase 1 [Source:HGNC Symbol;Acc:HGNC:391]	I-kappaB kinase/NF-kappaB signaling
AKT1	HGNC Symbol	AKT serine/threonine kinase 1 [Source:HGNC Symbol;Acc:HGNC:391]	cellular response to reactive oxygen species
AKT1	HGNC Symbol	AKT serine/threonine kinase 1 [Source:HGNC Symbol;Acc:HGNC:391]	NIK/NF-kappaB signaling
AKT1	HGNC Symbol	AKT serine/threonine kinase 1 [Source:HGNC Symbol;Acc:HGNC:391]	positive regulation of transcription, DNA-templated
AKT1	HGNC Symbol	AKT serine/threonine kinase 1 [Source:HGNC Symbol;Acc:HGNC:391]	cellular response to cadmium ion
AKT1	HGNC Symbol	AKT serine/threonine kinase 1 [Source:HGNC Symbol;Acc:HGNC:391]	T cell costimulation
AKT1	HGNC Symbol	AKT serine/threonine kinase 1 [Source:HGNC Symbol;Acc:HGNC:391]	activation of protein kinase B activity
AKT1	HGNC Symbol	AKT serine/threonine kinase 1 [Source:HGNC Symbol;Acc:HGNC:391]	endocrine pancreas development
AKT1	HGNC Symbol	AKT serine/threonine kinase 1 [Source:HGNC Symbol;Acc:HGNC:391]	cell population proliferation
AKT1	HGNC Symbol	AKT serine/threonine kinase 1 [Source:HGNC Symbol;Acc:HGNC:391]	negative regulation of neuron death
AKT1	HGNC Symbol	AKT serine/threonine kinase 1 [Source:HGNC Symbol;Acc:HGNC:391]	positive regulation of endothelial cell proliferation
AKT1	HGNC Symbol	AKT serine/threonine kinase 1 [Source:HGNC Symbol;Acc:HGNC:391]	response to oxidative stress
AKT1	HGNC Symbol	AKT serine/threonine kinase 1 [Source:HGNC Symbol;Acc:HGNC:391]	negative regulation of protein kinase B signaling
AKT1	HGNC Symbol	AKT serine/threonine kinase 1 [Source:HGNC Symbol;Acc:HGNC:391]	positive regulation of lipid biosynthetic process
AKT1	HGNC Symbol	AKT serine/threonine kinase 1 [Source:HGNC Symbol;Acc:HGNC:391]	negative regulation of oxidative stress-induced intrinsic apoptotic signaling pathway
AKT1	HGNC Symbol	AKT serine/threonine kinase 1 [Source:HGNC Symbol;Acc:HGNC:391]	negative regulation of protein ubiquitination
AKT1	HGNC Symbol	AKT serine/threonine kinase 1 [Source:HGNC Symbol;Acc:HGNC:391]	negative regulation of protein binding
AKT1	HGNC Symbol	AKT serine/threonine kinase 1 [Source:HGNC Symbol;Acc:HGNC:391]	nitric oxide biosynthetic process
AKT1	HGNC Symbol	AKT serine/threonine kinase 1 [Source:HGNC Symbol;Acc:HGNC:391]	positive regulation of cyclin-dependent protein serine/threonine kinase activity
AKT1	HGNC Symbol	AKT serine/threonine kinase 1 [Source:HGNC Symbol;Acc:HGNC:391]	response to UV-A
AKT1	HGNC Symbol	AKT serine/threonine kinase 1 [Source:HGNC Symbol;Acc:HGNC:391]	negative regulation of proteolysis
AKT1	HGNC Symbol	AKT serine/threonine kinase 1 [Source:HGNC Symbol;Acc:HGNC:391]	negative regulation of leukocyte cell-cell adhesion
AKT1	HGNC Symbol	AKT serine/threonine kinase 1 [Source:HGNC Symbol;Acc:HGNC:391]	interleukin-18-mediated signaling pathway
AKT1	HGNC Symbol	AKT serine/threonine kinase 1 [Source:HGNC Symbol;Acc:HGNC:391]	positive regulation of smooth muscle cell proliferation
AKT1	HGNC Symbol	AKT serine/threonine kinase 1 [Source:HGNC Symbol;Acc:HGNC:391]	positive regulation of glycogen biosynthetic process
AKT1	HGNC Symbol	AKT serine/threonine kinase 1 [Source:HGNC Symbol;Acc:HGNC:391]	negative regulation of endopeptidase activity
AKT1	HGNC Symbol	AKT serine/threonine kinase 1 [Source:HGNC Symbol;Acc:HGNC:391]	insulin-like growth factor receptor signaling pathway
AKT1	HGNC Symbol	AKT serine/threonine kinase 1 [Source:HGNC Symbol;Acc:HGNC:391]	positive regulation of protein localization to nucleus
AKT1	HGNC Symbol	AKT serine/threonine kinase 1 [Source:HGNC Symbol;Acc:HGNC:391]	negative regulation of long-chain fatty acid import across plasma membrane
AKT1	HGNC Symbol	AKT serine/threonine kinase 1 [Source:HGNC Symbol;Acc:HGNC:391]	positive regulation of blood vessel endothelial cell migration
AKT1	HGNC Symbol	AKT serine/threonine kinase 1 [Source:HGNC Symbol;Acc:HGNC:391]	excitatory postsynaptic potential
AKT1	HGNC Symbol	AKT serine/threonine kinase 1 [Source:HGNC Symbol;Acc:HGNC:391]	establishment of protein localization to mitochondrion
AKT1	HGNC Symbol	AKT serine/threonine kinase 1 [Source:HGNC Symbol;Acc:HGNC:391]	maintenance of protein location in mitochondrion
AKT1	HGNC Symbol	AKT serine/threonine kinase 1 [Source:HGNC Symbol;Acc:HGNC:391]	positive regulation of epidermal growth factor receptor signaling pathway
AKT1	HGNC Symbol	AKT serine/threonine kinase 1 [Source:HGNC Symbol;Acc:HGNC:391]	positive regulation of endodeoxyribonuclease activity
AKT1	HGNC Symbol	AKT serine/threonine kinase 1 [Source:HGNC Symbol;Acc:HGNC:391]	response to fluid shear stress
AKT1	HGNC Symbol	AKT serine/threonine kinase 1 [Source:HGNC Symbol;Acc:HGNC:391]	nitric-oxide synthase regulator activity
AKT1	HGNC Symbol	AKT serine/threonine kinase 1 [Source:HGNC Symbol;Acc:HGNC:391]	sphingosine-1-phosphate receptor signaling pathway
AKT1	HGNC Symbol	AKT serine/threonine kinase 1 [Source:HGNC Symbol;Acc:HGNC:391]	regulation of glycogen biosynthetic process
AKT1	HGNC Symbol	AKT serine/threonine kinase 1 [Source:HGNC Symbol;Acc:HGNC:391]	activation-induced cell death of T cells
AKT1	HGNC Symbol	AKT serine/threonine kinase 1 [Source:HGNC Symbol;Acc:HGNC:391]	response to heat
AKT1	HGNC Symbol	AKT serine/threonine kinase 1 [Source:HGNC Symbol;Acc:HGNC:391]	fibroblast migration
AKT1	HGNC Symbol	AKT serine/threonine kinase 1 [Source:HGNC Symbol;Acc:HGNC:391]	positive regulation of glucose metabolic process
AKT1	HGNC Symbol	AKT serine/threonine kinase 1 [Source:HGNC Symbol;Acc:HGNC:391]	positive regulation of mitochondrial membrane potential
AKT1	HGNC Symbol	AKT serine/threonine kinase 1 [Source:HGNC Symbol;Acc:HGNC:391]	negative regulation of macroautophagy
AKT1	HGNC Symbol	AKT serine/threonine kinase 1 [Source:HGNC Symbol;Acc:HGNC:391]	TOR signaling
AKT1	HGNC Symbol	AKT serine/threonine kinase 1 [Source:HGNC Symbol;Acc:HGNC:391]	negative regulation of fatty acid beta-oxidation
AKT1	HGNC Symbol	AKT serine/threonine kinase 1 [Source:HGNC Symbol;Acc:HGNC:391]	anoikis
AKT1	HGNC Symbol	AKT serine/threonine kinase 1 [Source:HGNC Symbol;Acc:HGNC:391]	negative regulation of protein kinase activity by protein phosphorylation
AKT1	HGNC Symbol	AKT serine/threonine kinase 1 [Source:HGNC Symbol;Acc:HGNC:391]	cellular response to oxidised low-density lipoprotein particle stimulus
AKT1	HGNC Symbol	AKT serine/threonine kinase 1 [Source:HGNC Symbol;Acc:HGNC:391]	positive regulation of I-kappaB phosphorylation
AKT1	HGNC Symbol	AKT serine/threonine kinase 1 [Source:HGNC Symbol;Acc:HGNC:391]	negative regulation of lymphocyte migration
AKT1	HGNC Symbol	AKT serine/threonine kinase 1 [Source:HGNC Symbol;Acc:HGNC:391]	extrinsic component of cytoplasmic side of plasma membrane
AKT2	HGNC Symbol	AKT serine/threonine kinase 2 [Source:HGNC Symbol;Acc:HGNC:392]	ATP binding
AKT2	HGNC Symbol	AKT serine/threonine kinase 2 [Source:HGNC Symbol;Acc:HGNC:392]	protein phosphorylation
AKT2	HGNC Symbol	AKT serine/threonine kinase 2 [Source:HGNC Symbol;Acc:HGNC:392]	protein serine/threonine kinase activity
AKT2	HGNC Symbol	AKT serine/threonine kinase 2 [Source:HGNC Symbol;Acc:HGNC:392]	protein kinase activity
AKT2	HGNC Symbol	AKT serine/threonine kinase 2 [Source:HGNC Symbol;Acc:HGNC:392]	positive regulation of glucose import
AKT2	HGNC Symbol	AKT serine/threonine kinase 2 [Source:HGNC Symbol;Acc:HGNC:392]	positive regulation of cell migration
AKT2	HGNC Symbol	AKT serine/threonine kinase 2 [Source:HGNC Symbol;Acc:HGNC:392]	cellular response to insulin stimulus
AKT2	HGNC Symbol	AKT serine/threonine kinase 2 [Source:HGNC Symbol;Acc:HGNC:392]	nucleus
AKT2	HGNC Symbol	AKT serine/threonine kinase 2 [Source:HGNC Symbol;Acc:HGNC:392]	cytoplasm
AKT2	HGNC Symbol	AKT serine/threonine kinase 2 [Source:HGNC Symbol;Acc:HGNC:392]	membrane
AKT2	HGNC Symbol	AKT serine/threonine kinase 2 [Source:HGNC Symbol;Acc:HGNC:392]	intracellular membrane-bounded organelle
AKT2	HGNC Symbol	AKT serine/threonine kinase 2 [Source:HGNC Symbol;Acc:HGNC:392]	metal ion binding
AKT2	HGNC Symbol	AKT serine/threonine kinase 2 [Source:HGNC Symbol;Acc:HGNC:392]	nucleotide binding
AKT2	HGNC Symbol	AKT serine/threonine kinase 2 [Source:HGNC Symbol;Acc:HGNC:392]	kinase activity
AKT2	HGNC Symbol	AKT serine/threonine kinase 2 [Source:HGNC Symbol;Acc:HGNC:392]	transferase activity
AKT2	HGNC Symbol	AKT serine/threonine kinase 2 [Source:HGNC Symbol;Acc:HGNC:392]
AKT2	HGNC Symbol	AKT serine/threonine kinase 2 [Source:HGNC Symbol;Acc:HGNC:392]	phosphorylation
AKT2	HGNC Symbol	AKT serine/threonine kinase 2 [Source:HGNC Symbol;Acc:HGNC:392]	negative regulation of apoptotic process
AKT2	HGNC Symbol	AKT serine/threonine kinase 2 [Source:HGNC Symbol;Acc:HGNC:392]	nucleoplasm
AKT2	HGNC Symbol	AKT serine/threonine kinase 2 [Source:HGNC Symbol;Acc:HGNC:392]	cytosol
AKT2	HGNC Symbol	AKT serine/threonine kinase 2 [Source:HGNC Symbol;Acc:HGNC:392]	plasma membrane
AKT2	HGNC Symbol	AKT serine/threonine kinase 2 [Source:HGNC Symbol;Acc:HGNC:392]	endosome
AKT2	HGNC Symbol	AKT serine/threonine kinase 2 [Source:HGNC Symbol;Acc:HGNC:392]	apoptotic process
AKT2	HGNC Symbol	AKT serine/threonine kinase 2 [Source:HGNC Symbol;Acc:HGNC:392]	regulation of translation
AKT2	HGNC Symbol	AKT serine/threonine kinase 2 [Source:HGNC Symbol;Acc:HGNC:392]	multicellular organism development
AKT2	HGNC Symbol	AKT serine/threonine kinase 2 [Source:HGNC Symbol;Acc:HGNC:392]	carbohydrate metabolic process
AKT2	HGNC Symbol	AKT serine/threonine kinase 2 [Source:HGNC Symbol;Acc:HGNC:392]	glycogen metabolic process
AKT2	HGNC Symbol	AKT serine/threonine kinase 2 [Source:HGNC Symbol;Acc:HGNC:392]	protein binding
AKT2	HGNC Symbol	AKT serine/threonine kinase 2 [Source:HGNC Symbol;Acc:HGNC:392]	signal transduction
AKT2	HGNC Symbol	AKT serine/threonine kinase 2 [Source:HGNC Symbol;Acc:HGNC:392]	cell cortex
AKT2	HGNC Symbol	AKT serine/threonine kinase 2 [Source:HGNC Symbol;Acc:HGNC:392]	early endosome
AKT2	HGNC Symbol	AKT serine/threonine kinase 2 [Source:HGNC Symbol;Acc:HGNC:392]	carbohydrate transport
AKT2	HGNC Symbol	AKT serine/threonine kinase 2 [Source:HGNC Symbol;Acc:HGNC:392]	ruffle membrane
AKT2	HGNC Symbol	AKT serine/threonine kinase 2 [Source:HGNC Symbol;Acc:HGNC:392]	intracellular signal transduction
AKT2	HGNC Symbol	AKT serine/threonine kinase 2 [Source:HGNC Symbol;Acc:HGNC:392]	glycogen biosynthetic process
AKT2	HGNC Symbol	AKT serine/threonine kinase 2 [Source:HGNC Symbol;Acc:HGNC:392]	glucose metabolic process
AKT2	HGNC Symbol	AKT serine/threonine kinase 2 [Source:HGNC Symbol;Acc:HGNC:392]	fat cell differentiation
AKT2	HGNC Symbol	AKT serine/threonine kinase 2 [Source:HGNC Symbol;Acc:HGNC:392]	positive regulation of protein phosphorylation
AKT2	HGNC Symbol	AKT serine/threonine kinase 2 [Source:HGNC Symbol;Acc:HGNC:392]	positive regulation of protein targeting to membrane
AKT2	HGNC Symbol	AKT serine/threonine kinase 2 [Source:HGNC Symbol;Acc:HGNC:392]	protein-containing complex
AKT2	HGNC Symbol	AKT serine/threonine kinase 2 [Source:HGNC Symbol;Acc:HGNC:392]	peptidyl-serine phosphorylation
AKT2	HGNC Symbol	AKT serine/threonine kinase 2 [Source:HGNC Symbol;Acc:HGNC:392]	positive regulation of cell population proliferation
AKT2	HGNC Symbol	AKT serine/threonine kinase 2 [Source:HGNC Symbol;Acc:HGNC:392]	regulation of cell migration
AKT2	HGNC Symbol	AKT serine/threonine kinase 2 [Source:HGNC Symbol;Acc:HGNC:392]	cellular protein modification process
AKT2	HGNC Symbol	AKT serine/threonine kinase 2 [Source:HGNC Symbol;Acc:HGNC:392]	insulin receptor signaling pathway
AKT2	HGNC Symbol	AKT serine/threonine kinase 2 [Source:HGNC Symbol;Acc:HGNC:392]	positive regulation of cell motility
AKT2	HGNC Symbol	AKT serine/threonine kinase 2 [Source:HGNC Symbol;Acc:HGNC:392]	mammary gland epithelial cell differentiation
AKT2	HGNC Symbol	AKT serine/threonine kinase 2 [Source:HGNC Symbol;Acc:HGNC:392]	positive regulation of glycogen biosynthetic process
AKT2	HGNC Symbol	AKT serine/threonine kinase 2 [Source:HGNC Symbol;Acc:HGNC:392]	positive regulation of vesicle fusion
AKT2	HGNC Symbol	AKT serine/threonine kinase 2 [Source:HGNC Symbol;Acc:HGNC:392]	negative regulation of long-chain fatty acid import across plasma membrane
AKT2	HGNC Symbol	AKT serine/threonine kinase 2 [Source:HGNC Symbol;Acc:HGNC:392]	positive regulation of glucose metabolic process
AKT2	HGNC Symbol	AKT serine/threonine kinase 2 [Source:HGNC Symbol;Acc:HGNC:392]	positive regulation of mitochondrial membrane potential
AKT2	HGNC Symbol	AKT serine/threonine kinase 2 [Source:HGNC Symbol;Acc:HGNC:392]	positive regulation of fatty acid beta-oxidation
AKT2	HGNC Symbol	AKT serine/threonine kinase 2 [Source:HGNC Symbol;Acc:HGNC:392]	peripheral nervous system myelin maintenance
AKT2	HGNC Symbol	AKT serine/threonine kinase 2 [Source:HGNC Symbol;Acc:HGNC:392]	intracellular protein transmembrane transport
AKT2	HGNC Symbol	AKT serine/threonine kinase 2 [Source:HGNC Symbol;Acc:HGNC:392]	regulation of cell cycle arrest
AKT2	HGNC Symbol	AKT serine/threonine kinase 2 [Source:HGNC Symbol;Acc:HGNC:392]	cellular response to high light intensity
AKT2	HGNC Symbol	AKT serine/threonine kinase 2 [Source:HGNC Symbol;Acc:HGNC:392]	protein localization to plasma membrane
AKT2	HGNC Symbol	AKT serine/threonine kinase 2 [Source:HGNC Symbol;Acc:HGNC:392]	activation of GTPase activity
AKT2	HGNC Symbol	AKT serine/threonine kinase 2 [Source:HGNC Symbol;Acc:HGNC:392]	retinal rod cell apoptotic process
ALK	HGNC Symbol	ALK receptor tyrosine kinase [Source:HGNC Symbol;Acc:HGNC:427]	ATP binding
ALK	HGNC Symbol	ALK receptor tyrosine kinase [Source:HGNC Symbol;Acc:HGNC:427]	signal transduction
ALK	HGNC Symbol	ALK receptor tyrosine kinase [Source:HGNC Symbol;Acc:HGNC:427]	membrane
ALK	HGNC Symbol	ALK receptor tyrosine kinase [Source:HGNC Symbol;Acc:HGNC:427]	protein phosphorylation
ALK	HGNC Symbol	ALK receptor tyrosine kinase [Source:HGNC Symbol;Acc:HGNC:427]	protein kinase activity
ALK	HGNC Symbol	ALK receptor tyrosine kinase [Source:HGNC Symbol;Acc:HGNC:427]	transmembrane receptor protein tyrosine kinase signaling pathway
ALK	HGNC Symbol	ALK receptor tyrosine kinase [Source:HGNC Symbol;Acc:HGNC:427]	transmembrane receptor protein tyrosine kinase activity
ALK	HGNC Symbol	ALK receptor tyrosine kinase [Source:HGNC Symbol;Acc:HGNC:427]	phosphorylation
ALK	HGNC Symbol	ALK receptor tyrosine kinase [Source:HGNC Symbol;Acc:HGNC:427]	protein tyrosine kinase activity
ALK	HGNC Symbol	ALK receptor tyrosine kinase [Source:HGNC Symbol;Acc:HGNC:427]	activation of MAPK activity
ALK	HGNC Symbol	ALK receptor tyrosine kinase [Source:HGNC Symbol;Acc:HGNC:427]	neuron development
ALK	HGNC Symbol	ALK receptor tyrosine kinase [Source:HGNC Symbol;Acc:HGNC:427]	integral component of membrane
ALK	HGNC Symbol	ALK receptor tyrosine kinase [Source:HGNC Symbol;Acc:HGNC:427]	nucleotide binding
ALK	HGNC Symbol	ALK receptor tyrosine kinase [Source:HGNC Symbol;Acc:HGNC:427]	kinase activity
ALK	HGNC Symbol	ALK receptor tyrosine kinase [Source:HGNC Symbol;Acc:HGNC:427]	peptidyl-tyrosine phosphorylation
ALK	HGNC Symbol	ALK receptor tyrosine kinase [Source:HGNC Symbol;Acc:HGNC:427]	protein binding
ALK	HGNC Symbol	ALK receptor tyrosine kinase [Source:HGNC Symbol;Acc:HGNC:427]	transferase activity
ALK	HGNC Symbol	ALK receptor tyrosine kinase [Source:HGNC Symbol;Acc:HGNC:427]	plasma membrane
ALK	HGNC Symbol	ALK receptor tyrosine kinase [Source:HGNC Symbol;Acc:HGNC:427]	identical protein binding
ALK	HGNC Symbol	ALK receptor tyrosine kinase [Source:HGNC Symbol;Acc:HGNC:427]	integral component of plasma membrane
ALK	HGNC Symbol	ALK receptor tyrosine kinase [Source:HGNC Symbol;Acc:HGNC:427]	extracellular exosome
ALK	HGNC Symbol	ALK receptor tyrosine kinase [Source:HGNC Symbol;Acc:HGNC:427]	protein-containing complex
ALK	HGNC Symbol	ALK receptor tyrosine kinase [Source:HGNC Symbol;Acc:HGNC:427]	regulation of cell population proliferation
ALK	HGNC Symbol	ALK receptor tyrosine kinase [Source:HGNC Symbol;Acc:HGNC:427]	regulation of apoptotic process
ALK	HGNC Symbol	ALK receptor tyrosine kinase [Source:HGNC Symbol;Acc:HGNC:427]	positive regulation of NF-kappaB transcription factor activity
ALK	HGNC Symbol	ALK receptor tyrosine kinase [Source:HGNC Symbol;Acc:HGNC:427]	receptor complex
ALK	HGNC Symbol	ALK receptor tyrosine kinase [Source:HGNC Symbol;Acc:HGNC:427]	protein autophosphorylation
ALK	HGNC Symbol	ALK receptor tyrosine kinase [Source:HGNC Symbol;Acc:HGNC:427]	energy homeostasis
ALK	HGNC Symbol	ALK receptor tyrosine kinase [Source:HGNC Symbol;Acc:HGNC:427]	multicellular organism development
ALK	HGNC Symbol	ALK receptor tyrosine kinase [Source:HGNC Symbol;Acc:HGNC:427]	positive regulation of kinase activity
ALK	HGNC Symbol	ALK receptor tyrosine kinase [Source:HGNC Symbol;Acc:HGNC:427]	regulation of neuron differentiation
ALK	HGNC Symbol	ALK receptor tyrosine kinase [Source:HGNC Symbol;Acc:HGNC:427]	positive regulation of dendrite development
ALK	HGNC Symbol	ALK receptor tyrosine kinase [Source:HGNC Symbol;Acc:HGNC:427]	NF-kappaB-inducing kinase activity
ALK	HGNC Symbol	ALK receptor tyrosine kinase [Source:HGNC Symbol;Acc:HGNC:427]	NIK/NF-kappaB signaling
ALK	HGNC Symbol	ALK receptor tyrosine kinase [Source:HGNC Symbol;Acc:HGNC:427]	negative regulation of lipid catabolic process
ALK	HGNC Symbol	ALK receptor tyrosine kinase [Source:HGNC Symbol;Acc:HGNC:427]	nervous system development
ALK	HGNC Symbol	ALK receptor tyrosine kinase [Source:HGNC Symbol;Acc:HGNC:427]	brain development
ALK	HGNC Symbol	ALK receptor tyrosine kinase [Source:HGNC Symbol;Acc:HGNC:427]	hippocampus development
ALK	HGNC Symbol	ALK receptor tyrosine kinase [Source:HGNC Symbol;Acc:HGNC:427]	adult behavior
ALK	HGNC Symbol	ALK receptor tyrosine kinase [Source:HGNC Symbol;Acc:HGNC:427]	swimming behavior
ALK	HGNC Symbol	ALK receptor tyrosine kinase [Source:HGNC Symbol;Acc:HGNC:427]	regulation of dopamine receptor signaling pathway
ALK	HGNC Symbol	ALK receptor tyrosine kinase [Source:HGNC Symbol;Acc:HGNC:427]	response to environmental enrichment
ALK	HGNC Symbol	ALK receptor tyrosine kinase [Source:HGNC Symbol;Acc:HGNC:427]
APC	HGNC Symbol	APC regulator of WNT signaling pathway [Source:HGNC Symbol;Acc:HGNC:583]	nucleus
APC	HGNC Symbol	APC regulator of WNT signaling pathway [Source:HGNC Symbol;Acc:HGNC:583]	cytoplasm
APC	HGNC Symbol	APC regulator of WNT signaling pathway [Source:HGNC Symbol;Acc:HGNC:583]	cell cycle arrest
APC	HGNC Symbol	APC regulator of WNT signaling pathway [Source:HGNC Symbol;Acc:HGNC:583]	negative regulation of Wnt signaling pathway
APC	HGNC Symbol	APC regulator of WNT signaling pathway [Source:HGNC Symbol;Acc:HGNC:583]	beta-catenin binding
APC	HGNC Symbol	APC regulator of WNT signaling pathway [Source:HGNC Symbol;Acc:HGNC:583]	positive regulation of apoptotic process
APC	HGNC Symbol	APC regulator of WNT signaling pathway [Source:HGNC Symbol;Acc:HGNC:583]	negative regulation of cell population proliferation
APC	HGNC Symbol	APC regulator of WNT signaling pathway [Source:HGNC Symbol;Acc:HGNC:583]	cellular response to DNA damage stimulus
APC	HGNC Symbol	APC regulator of WNT signaling pathway [Source:HGNC Symbol;Acc:HGNC:583]	cell migration
APC	HGNC Symbol	APC regulator of WNT signaling pathway [Source:HGNC Symbol;Acc:HGNC:583]	mitotic cytokinesis
APC	HGNC Symbol	APC regulator of WNT signaling pathway [Source:HGNC Symbol;Acc:HGNC:583]	negative regulation of microtubule depolymerization
APC	HGNC Symbol	APC regulator of WNT signaling pathway [Source:HGNC Symbol;Acc:HGNC:583]
APC	HGNC Symbol	APC regulator of WNT signaling pathway [Source:HGNC Symbol;Acc:HGNC:583]	protein binding
APC	HGNC Symbol	APC regulator of WNT signaling pathway [Source:HGNC Symbol;Acc:HGNC:583]	Wnt signaling pathway
APC	HGNC Symbol	APC regulator of WNT signaling pathway [Source:HGNC Symbol;Acc:HGNC:583]	microtubule binding
APC	HGNC Symbol	APC regulator of WNT signaling pathway [Source:HGNC Symbol;Acc:HGNC:583]	membrane
APC	HGNC Symbol	APC regulator of WNT signaling pathway [Source:HGNC Symbol;Acc:HGNC:583]	plasma membrane
APC	HGNC Symbol	APC regulator of WNT signaling pathway [Source:HGNC Symbol;Acc:HGNC:583]	cytoskeleton
APC	HGNC Symbol	APC regulator of WNT signaling pathway [Source:HGNC Symbol;Acc:HGNC:583]	cell adhesion
APC	HGNC Symbol	APC regulator of WNT signaling pathway [Source:HGNC Symbol;Acc:HGNC:583]	adherens junction
APC	HGNC Symbol	APC regulator of WNT signaling pathway [Source:HGNC Symbol;Acc:HGNC:583]	cell junction
APC	HGNC Symbol	APC regulator of WNT signaling pathway [Source:HGNC Symbol;Acc:HGNC:583]	cell projection
APC	HGNC Symbol	APC regulator of WNT signaling pathway [Source:HGNC Symbol;Acc:HGNC:583]	microtubule
APC	HGNC Symbol	APC regulator of WNT signaling pathway [Source:HGNC Symbol;Acc:HGNC:583]	lamellipodium
APC	HGNC Symbol	APC regulator of WNT signaling pathway [Source:HGNC Symbol;Acc:HGNC:583]	kinetochore
APC	HGNC Symbol	APC regulator of WNT signaling pathway [Source:HGNC Symbol;Acc:HGNC:583]	centrosome
APC	HGNC Symbol	APC regulator of WNT signaling pathway [Source:HGNC Symbol;Acc:HGNC:583]	bicellular tight junction
APC	HGNC Symbol	APC regulator of WNT signaling pathway [Source:HGNC Symbol;Acc:HGNC:583]	ruffle membrane
APC	HGNC Symbol	APC regulator of WNT signaling pathway [Source:HGNC Symbol;Acc:HGNC:583]	negative regulation of canonical Wnt signaling pathway
APC	HGNC Symbol	APC regulator of WNT signaling pathway [Source:HGNC Symbol;Acc:HGNC:583]	nucleoplasm
APC	HGNC Symbol	APC regulator of WNT signaling pathway [Source:HGNC Symbol;Acc:HGNC:583]	cytosol
APC	HGNC Symbol	APC regulator of WNT signaling pathway [Source:HGNC Symbol;Acc:HGNC:583]	nervous system development
APC	HGNC Symbol	APC regulator of WNT signaling pathway [Source:HGNC Symbol;Acc:HGNC:583]	protein kinase binding
APC	HGNC Symbol	APC regulator of WNT signaling pathway [Source:HGNC Symbol;Acc:HGNC:583]	protein deubiquitination
APC	HGNC Symbol	APC regulator of WNT signaling pathway [Source:HGNC Symbol;Acc:HGNC:583]	cytoplasmic microtubule
APC	HGNC Symbol	APC regulator of WNT signaling pathway [Source:HGNC Symbol;Acc:HGNC:583]	gamma-catenin binding
APC	HGNC Symbol	APC regulator of WNT signaling pathway [Source:HGNC Symbol;Acc:HGNC:583]	cell fate specification
APC	HGNC Symbol	APC regulator of WNT signaling pathway [Source:HGNC Symbol;Acc:HGNC:583]	pattern specification process
APC	HGNC Symbol	APC regulator of WNT signaling pathway [Source:HGNC Symbol;Acc:HGNC:583]	regulation of cell differentiation
APC	HGNC Symbol	APC regulator of WNT signaling pathway [Source:HGNC Symbol;Acc:HGNC:583]	positive regulation of protein catabolic process
APC	HGNC Symbol	APC regulator of WNT signaling pathway [Source:HGNC Symbol;Acc:HGNC:583]	catenin complex
APC	HGNC Symbol	APC regulator of WNT signaling pathway [Source:HGNC Symbol;Acc:HGNC:583]	beta-catenin destruction complex
APC	HGNC Symbol	APC regulator of WNT signaling pathway [Source:HGNC Symbol;Acc:HGNC:583]	negative regulation of cyclin-dependent protein serine/threonine kinase activity
APC	HGNC Symbol	APC regulator of WNT signaling pathway [Source:HGNC Symbol;Acc:HGNC:583]	protein-containing complex assembly
APC	HGNC Symbol	APC regulator of WNT signaling pathway [Source:HGNC Symbol;Acc:HGNC:583]	positive regulation of cold-induced thermogenesis
APC	HGNC Symbol	APC regulator of WNT signaling pathway [Source:HGNC Symbol;Acc:HGNC:583]	beta-catenin destruction complex disassembly
APC	HGNC Symbol	APC regulator of WNT signaling pathway [Source:HGNC Symbol;Acc:HGNC:583]	beta-catenin destruction complex assembly
APC	HGNC Symbol	APC regulator of WNT signaling pathway [Source:HGNC Symbol;Acc:HGNC:583]	lateral plasma membrane
APC	HGNC Symbol	APC regulator of WNT signaling pathway [Source:HGNC Symbol;Acc:HGNC:583]	bicellular tight junction assembly
APC	HGNC Symbol	APC regulator of WNT signaling pathway [Source:HGNC Symbol;Acc:HGNC:583]	regulation of microtubule-based process
APC	HGNC Symbol	APC regulator of WNT signaling pathway [Source:HGNC Symbol;Acc:HGNC:583]	microtubule plus-end binding
APC	HGNC Symbol	APC regulator of WNT signaling pathway [Source:HGNC Symbol;Acc:HGNC:583]	Wnt signalosome
APC	HGNC Symbol	APC regulator of WNT signaling pathway [Source:HGNC Symbol;Acc:HGNC:583]	perinuclear region of cytoplasm
APC	HGNC Symbol	APC regulator of WNT signaling pathway [Source:HGNC Symbol;Acc:HGNC:583]	positive regulation of cell migration
APC	HGNC Symbol	APC regulator of WNT signaling pathway [Source:HGNC Symbol;Acc:HGNC:583]	protein kinase regulator activity
APC	HGNC Symbol	APC regulator of WNT signaling pathway [Source:HGNC Symbol;Acc:HGNC:583]	ubiquitin protein ligase binding
APC	HGNC Symbol	APC regulator of WNT signaling pathway [Source:HGNC Symbol;Acc:HGNC:583]	dynein complex binding
APC	HGNC Symbol	APC regulator of WNT signaling pathway [Source:HGNC Symbol;Acc:HGNC:583]	mitotic spindle assembly checkpoint
APC	HGNC Symbol	APC regulator of WNT signaling pathway [Source:HGNC Symbol;Acc:HGNC:583]	insulin receptor signaling pathway
APC	HGNC Symbol	APC regulator of WNT signaling pathway [Source:HGNC Symbol;Acc:HGNC:583]	positive regulation of cell death
APC	HGNC Symbol	APC regulator of WNT signaling pathway [Source:HGNC Symbol;Acc:HGNC:583]	positive regulation of pseudopodium assembly
APC	HGNC Symbol	APC regulator of WNT signaling pathway [Source:HGNC Symbol;Acc:HGNC:583]	regulation of attachment of spindle microtubules to kinetochore
APC	HGNC Symbol	APC regulator of WNT signaling pathway [Source:HGNC Symbol;Acc:HGNC:583]	positive regulation of protein localization to centrosome
ARID1A	HGNC Symbol	AT-rich interaction domain 1A [Source:HGNC Symbol;Acc:HGNC:11110]	DNA binding
ARID1A	HGNC Symbol	AT-rich interaction domain 1A [Source:HGNC Symbol;Acc:HGNC:11110]	chromatin remodeling
ARID1A	HGNC Symbol	AT-rich interaction domain 1A [Source:HGNC Symbol;Acc:HGNC:11110]	SWI/SNF complex
ARID1A	HGNC Symbol	AT-rich interaction domain 1A [Source:HGNC Symbol;Acc:HGNC:11110]	brahma complex
ARID1A	HGNC Symbol	AT-rich interaction domain 1A [Source:HGNC Symbol;Acc:HGNC:11110]	nucleus
ARID1A	HGNC Symbol	AT-rich interaction domain 1A [Source:HGNC Symbol;Acc:HGNC:11110]	nucleoplasm
ARID1A	HGNC Symbol	AT-rich interaction domain 1A [Source:HGNC Symbol;Acc:HGNC:11110]	chromatin organization
ARID1A	HGNC Symbol	AT-rich interaction domain 1A [Source:HGNC Symbol;Acc:HGNC:11110]	protein binding
ARID1A	HGNC Symbol	AT-rich interaction domain 1A [Source:HGNC Symbol;Acc:HGNC:11110]	nervous system development
ARID1A	HGNC Symbol	AT-rich interaction domain 1A [Source:HGNC Symbol;Acc:HGNC:11110]	positive regulation of transcription, DNA-templated
ARID1A	HGNC Symbol	AT-rich interaction domain 1A [Source:HGNC Symbol;Acc:HGNC:11110]	regulation of transcription by RNA polymerase II
ARID1A	HGNC Symbol	AT-rich interaction domain 1A [Source:HGNC Symbol;Acc:HGNC:11110]	ATP-dependent chromatin remodeling
ARID1A	HGNC Symbol	AT-rich interaction domain 1A [Source:HGNC Symbol;Acc:HGNC:11110]	transcription coactivator activity
ARID1A	HGNC Symbol	AT-rich interaction domain 1A [Source:HGNC Symbol;Acc:HGNC:11110]	nuclear chromatin
ARID1A	HGNC Symbol	AT-rich interaction domain 1A [Source:HGNC Symbol;Acc:HGNC:11110]	androgen receptor signaling pathway
ARID1A	HGNC Symbol	AT-rich interaction domain 1A [Source:HGNC Symbol;Acc:HGNC:11110]	nucleosome binding
ARID1A	HGNC Symbol	AT-rich interaction domain 1A [Source:HGNC Symbol;Acc:HGNC:11110]	nuclear receptor binding
ARID1A	HGNC Symbol	AT-rich interaction domain 1A [Source:HGNC Symbol;Acc:HGNC:11110]	negative regulation of transcription by RNA polymerase II
ARID1A	HGNC Symbol	AT-rich interaction domain 1A [Source:HGNC Symbol;Acc:HGNC:11110]	formation of primary germ layer
ARID1A	HGNC Symbol	AT-rich interaction domain 1A [Source:HGNC Symbol;Acc:HGNC:11110]	neural tube closure
ARID1A	HGNC Symbol	AT-rich interaction domain 1A [Source:HGNC Symbol;Acc:HGNC:11110]	cardiac chamber development
ARID1A	HGNC Symbol	AT-rich interaction domain 1A [Source:HGNC Symbol;Acc:HGNC:11110]	optic cup formation involved in camera-type eye development
ARID1A	HGNC Symbol	AT-rich interaction domain 1A [Source:HGNC Symbol;Acc:HGNC:11110]	nucleosome disassembly
ARID1A	HGNC Symbol	AT-rich interaction domain 1A [Source:HGNC Symbol;Acc:HGNC:11110]	gastrulation
ARID1A	HGNC Symbol	AT-rich interaction domain 1A [Source:HGNC Symbol;Acc:HGNC:11110]	embryo implantation
ARID1A	HGNC Symbol	AT-rich interaction domain 1A [Source:HGNC Symbol;Acc:HGNC:11110]	stem cell population maintenance
ARID1A	HGNC Symbol	AT-rich interaction domain 1A [Source:HGNC Symbol;Acc:HGNC:11110]	intracellular estrogen receptor signaling pathway
ARID1A	HGNC Symbol	AT-rich interaction domain 1A [Source:HGNC Symbol;Acc:HGNC:11110]	forebrain development
ARID1A	HGNC Symbol	AT-rich interaction domain 1A [Source:HGNC Symbol;Acc:HGNC:11110]	nucleosome mobilization
ARID1A	HGNC Symbol	AT-rich interaction domain 1A [Source:HGNC Symbol;Acc:HGNC:11110]	glucocorticoid receptor signaling pathway
ARID1A	HGNC Symbol	AT-rich interaction domain 1A [Source:HGNC Symbol;Acc:HGNC:11110]	chromatin-mediated maintenance of transcription
ARID1A	HGNC Symbol	AT-rich interaction domain 1A [Source:HGNC Symbol;Acc:HGNC:11110]	cardiac muscle cell differentiation
ARID1A	HGNC Symbol	AT-rich interaction domain 1A [Source:HGNC Symbol;Acc:HGNC:11110]	placenta blood vessel development
ARID1A	HGNC Symbol	AT-rich interaction domain 1A [Source:HGNC Symbol;Acc:HGNC:11110]	heterochromatin maintenance
ARID1A	HGNC Symbol	AT-rich interaction domain 1A [Source:HGNC Symbol;Acc:HGNC:11110]	toxin transport
ARID1A	HGNC Symbol	AT-rich interaction domain 1A [Source:HGNC Symbol;Acc:HGNC:11110]	npBAF complex
ARID1A	HGNC Symbol	AT-rich interaction domain 1A [Source:HGNC Symbol;Acc:HGNC:11110]	nBAF complex
ARID1A	HGNC Symbol	AT-rich interaction domain 1A [Source:HGNC Symbol;Acc:HGNC:11110]
ARID1B	HGNC Symbol	AT-rich interaction domain 1B [Source:HGNC Symbol;Acc:HGNC:18040]	DNA binding
ARID1B	HGNC Symbol	AT-rich interaction domain 1B [Source:HGNC Symbol;Acc:HGNC:18040]	chromatin remodeling
ARID1B	HGNC Symbol	AT-rich interaction domain 1B [Source:HGNC Symbol;Acc:HGNC:18040]	SWI/SNF complex
ARID1B	HGNC Symbol	AT-rich interaction domain 1B [Source:HGNC Symbol;Acc:HGNC:18040]	brahma complex
ARID1B	HGNC Symbol	AT-rich interaction domain 1B [Source:HGNC Symbol;Acc:HGNC:18040]	nBAF complex
ARID1B	HGNC Symbol	AT-rich interaction domain 1B [Source:HGNC Symbol;Acc:HGNC:18040]	nucleus
ARID1B	HGNC Symbol	AT-rich interaction domain 1B [Source:HGNC Symbol;Acc:HGNC:18040]	nucleoplasm
ARID1B	HGNC Symbol	AT-rich interaction domain 1B [Source:HGNC Symbol;Acc:HGNC:18040]	cytosol
ARID1B	HGNC Symbol	AT-rich interaction domain 1B [Source:HGNC Symbol;Acc:HGNC:18040]	plasma membrane
ARID1B	HGNC Symbol	AT-rich interaction domain 1B [Source:HGNC Symbol;Acc:HGNC:18040]	chromatin organization
ARID1B	HGNC Symbol	AT-rich interaction domain 1B [Source:HGNC Symbol;Acc:HGNC:18040]	protein binding
ARID1B	HGNC Symbol	AT-rich interaction domain 1B [Source:HGNC Symbol;Acc:HGNC:18040]	nervous system development
ARID1B	HGNC Symbol	AT-rich interaction domain 1B [Source:HGNC Symbol;Acc:HGNC:18040]	synapse
ARID1B	HGNC Symbol	AT-rich interaction domain 1B [Source:HGNC Symbol;Acc:HGNC:18040]	transcription coactivator activity
ARID1B	HGNC Symbol	AT-rich interaction domain 1B [Source:HGNC Symbol;Acc:HGNC:18040]	regulation of transcription by RNA polymerase II
ARID1B	HGNC Symbol	AT-rich interaction domain 1B [Source:HGNC Symbol;Acc:HGNC:18040]	ATP-dependent chromatin remodeling
ARID1B	HGNC Symbol	AT-rich interaction domain 1B [Source:HGNC Symbol;Acc:HGNC:18040]	positive regulation of transcription, DNA-templated
ARID1B	HGNC Symbol	AT-rich interaction domain 1B [Source:HGNC Symbol;Acc:HGNC:18040]	nucleosome binding
ARID1B	HGNC Symbol	AT-rich interaction domain 1B [Source:HGNC Symbol;Acc:HGNC:18040]	chromatin-mediated maintenance of transcription
ARID1B	HGNC Symbol	AT-rich interaction domain 1B [Source:HGNC Symbol;Acc:HGNC:18040]	response to ischemia
ARID1B	HGNC Symbol	AT-rich interaction domain 1B [Source:HGNC Symbol;Acc:HGNC:18040]	neuron-neuron synaptic transmission
ARID1B	HGNC Symbol	AT-rich interaction domain 1B [Source:HGNC Symbol;Acc:HGNC:18040]	dendritic spine development
ARID1B	HGNC Symbol	AT-rich interaction domain 1B [Source:HGNC Symbol;Acc:HGNC:18040]	dendritic cell dendrite assembly
ARID1B	HGNC Symbol	AT-rich interaction domain 1B [Source:HGNC Symbol;Acc:HGNC:18040]	cellular response to angiotensin
ARID1B	HGNC Symbol	AT-rich interaction domain 1B [Source:HGNC Symbol;Acc:HGNC:18040]	cytoplasm
ARID1B	HGNC Symbol	AT-rich interaction domain 1B [Source:HGNC Symbol;Acc:HGNC:18040]
ARID2	HGNC Symbol	AT-rich interaction domain 2 [Source:HGNC Symbol;Acc:HGNC:18037]	DNA binding
ARID2	HGNC Symbol	AT-rich interaction domain 2 [Source:HGNC Symbol;Acc:HGNC:18037]	regulation of transcription, DNA-templated
ARID2	HGNC Symbol	AT-rich interaction domain 2 [Source:HGNC Symbol;Acc:HGNC:18037]	nucleic acid binding
ARID2	HGNC Symbol	AT-rich interaction domain 2 [Source:HGNC Symbol;Acc:HGNC:18037]	negative regulation of cell population proliferation
ARID2	HGNC Symbol	AT-rich interaction domain 2 [Source:HGNC Symbol;Acc:HGNC:18037]	negative regulation of cell migration
ARID2	HGNC Symbol	AT-rich interaction domain 2 [Source:HGNC Symbol;Acc:HGNC:18037]	nucleus
ARID2	HGNC Symbol	AT-rich interaction domain 2 [Source:HGNC Symbol;Acc:HGNC:18037]	metal ion binding
ARID2	HGNC Symbol	AT-rich interaction domain 2 [Source:HGNC Symbol;Acc:HGNC:18037]	nucleoplasm
ARID2	HGNC Symbol	AT-rich interaction domain 2 [Source:HGNC Symbol;Acc:HGNC:18037]	plasma membrane
ARID2	HGNC Symbol	AT-rich interaction domain 2 [Source:HGNC Symbol;Acc:HGNC:18037]	chromatin organization
ARID2	HGNC Symbol	AT-rich interaction domain 2 [Source:HGNC Symbol;Acc:HGNC:18037]	protein binding
ARID2	HGNC Symbol	AT-rich interaction domain 2 [Source:HGNC Symbol;Acc:HGNC:18037]	nucleosome disassembly
ARID2	HGNC Symbol	AT-rich interaction domain 2 [Source:HGNC Symbol;Acc:HGNC:18037]	heart morphogenesis
ARID2	HGNC Symbol	AT-rich interaction domain 2 [Source:HGNC Symbol;Acc:HGNC:18037]	homeostatic process
ARID2	HGNC Symbol	AT-rich interaction domain 2 [Source:HGNC Symbol;Acc:HGNC:18037]	embryonic organ development
ARID2	HGNC Symbol	AT-rich interaction domain 2 [Source:HGNC Symbol;Acc:HGNC:18037]	cardiac muscle cell proliferation
ARID2	HGNC Symbol	AT-rich interaction domain 2 [Source:HGNC Symbol;Acc:HGNC:18037]	coronary artery morphogenesis
ARID2	HGNC Symbol	AT-rich interaction domain 2 [Source:HGNC Symbol;Acc:HGNC:18037]	circulatory system development
ARID2	HGNC Symbol	AT-rich interaction domain 2 [Source:HGNC Symbol;Acc:HGNC:18037]	positive regulation of double-strand break repair via homologous recombination
ARID2	HGNC Symbol	AT-rich interaction domain 2 [Source:HGNC Symbol;Acc:HGNC:18037]
ARID5B	HGNC Symbol	AT-rich interaction domain 5B [Source:HGNC Symbol;Acc:HGNC:17362]	DNA binding
ARID5B	HGNC Symbol	AT-rich interaction domain 5B [Source:HGNC Symbol;Acc:HGNC:17362]	nucleus
ARID5B	HGNC Symbol	AT-rich interaction domain 5B [Source:HGNC Symbol;Acc:HGNC:17362]	transcription coactivator activity
ARID5B	HGNC Symbol	AT-rich interaction domain 5B [Source:HGNC Symbol;Acc:HGNC:17362]	positive regulation of DNA-binding transcription factor activity
ARID5B	HGNC Symbol	AT-rich interaction domain 5B [Source:HGNC Symbol;Acc:HGNC:17362]	adipose tissue development
ARID5B	HGNC Symbol	AT-rich interaction domain 5B [Source:HGNC Symbol;Acc:HGNC:17362]	positive regulation of nucleic acid-templated transcription
ARID5B	HGNC Symbol	AT-rich interaction domain 5B [Source:HGNC Symbol;Acc:HGNC:17362]	protein binding
ARID5B	HGNC Symbol	AT-rich interaction domain 5B [Source:HGNC Symbol;Acc:HGNC:17362]	regulation of transcription by RNA polymerase II
ARID5B	HGNC Symbol	AT-rich interaction domain 5B [Source:HGNC Symbol;Acc:HGNC:17362]	negative regulation of transcription by RNA polymerase II
ARID5B	HGNC Symbol	AT-rich interaction domain 5B [Source:HGNC Symbol;Acc:HGNC:17362]	nucleoplasm
ARID5B	HGNC Symbol	AT-rich interaction domain 5B [Source:HGNC Symbol;Acc:HGNC:17362]	transcription regulatory region sequence-specific DNA binding
ARID5B	HGNC Symbol	AT-rich interaction domain 5B [Source:HGNC Symbol;Acc:HGNC:17362]	liver development
ARID5B	HGNC Symbol	AT-rich interaction domain 5B [Source:HGNC Symbol;Acc:HGNC:17362]	negative regulation of transcription, DNA-templated
ARID5B	HGNC Symbol	AT-rich interaction domain 5B [Source:HGNC Symbol;Acc:HGNC:17362]	kidney development
ARID5B	HGNC Symbol	AT-rich interaction domain 5B [Source:HGNC Symbol;Acc:HGNC:17362]	nitrogen compound metabolic process
ARID5B	HGNC Symbol	AT-rich interaction domain 5B [Source:HGNC Symbol;Acc:HGNC:17362]	male gonad development
ARID5B	HGNC Symbol	AT-rich interaction domain 5B [Source:HGNC Symbol;Acc:HGNC:17362]	female gonad development
ARID5B	HGNC Symbol	AT-rich interaction domain 5B [Source:HGNC Symbol;Acc:HGNC:17362]	post-embryonic development
ARID5B	HGNC Symbol	AT-rich interaction domain 5B [Source:HGNC Symbol;Acc:HGNC:17362]	fibroblast migration
ARID5B	HGNC Symbol	AT-rich interaction domain 5B [Source:HGNC Symbol;Acc:HGNC:17362]	adrenal gland development
ARID5B	HGNC Symbol	AT-rich interaction domain 5B [Source:HGNC Symbol;Acc:HGNC:17362]	multicellular organism growth
ARID5B	HGNC Symbol	AT-rich interaction domain 5B [Source:HGNC Symbol;Acc:HGNC:17362]	fat cell differentiation
ARID5B	HGNC Symbol	AT-rich interaction domain 5B [Source:HGNC Symbol;Acc:HGNC:17362]	platelet-derived growth factor receptor signaling pathway
ARID5B	HGNC Symbol	AT-rich interaction domain 5B [Source:HGNC Symbol;Acc:HGNC:17362]	cell development
ARID5B	HGNC Symbol	AT-rich interaction domain 5B [Source:HGNC Symbol;Acc:HGNC:17362]	muscle organ morphogenesis
ARID5B	HGNC Symbol	AT-rich interaction domain 5B [Source:HGNC Symbol;Acc:HGNC:17362]	skeletal system morphogenesis
ARID5B	HGNC Symbol	AT-rich interaction domain 5B [Source:HGNC Symbol;Acc:HGNC:17362]	roof of mouth development
ARID5B	HGNC Symbol	AT-rich interaction domain 5B [Source:HGNC Symbol;Acc:HGNC:17362]	face morphogenesis
ARID5B	HGNC Symbol	AT-rich interaction domain 5B [Source:HGNC Symbol;Acc:HGNC:17362]	fat pad development
ARID5B	HGNC Symbol	AT-rich interaction domain 5B [Source:HGNC Symbol;Acc:HGNC:17362]	cellular response to leukemia inhibitory factor
ARID5B	HGNC Symbol	AT-rich interaction domain 5B [Source:HGNC Symbol;Acc:HGNC:17362]
ASXL1	HGNC Symbol	ASXL transcriptional regulator 1 [Source:HGNC Symbol;Acc:HGNC:18318]	regulation of transcription, DNA-templated
ASXL1	HGNC Symbol	ASXL transcriptional regulator 1 [Source:HGNC Symbol;Acc:HGNC:18318]	transcription, DNA-templated
ASXL1	HGNC Symbol	ASXL transcriptional regulator 1 [Source:HGNC Symbol;Acc:HGNC:18318]	nucleus
ASXL1	HGNC Symbol	ASXL transcriptional regulator 1 [Source:HGNC Symbol;Acc:HGNC:18318]	metal ion binding
ASXL1	HGNC Symbol	ASXL transcriptional regulator 1 [Source:HGNC Symbol;Acc:HGNC:18318]	DNA binding
ASXL1	HGNC Symbol	ASXL transcriptional regulator 1 [Source:HGNC Symbol;Acc:HGNC:18318]	chromatin organization
ASXL1	HGNC Symbol	ASXL transcriptional regulator 1 [Source:HGNC Symbol;Acc:HGNC:18318]	protein binding
ASXL1	HGNC Symbol	ASXL transcriptional regulator 1 [Source:HGNC Symbol;Acc:HGNC:18318]	transcription coactivator activity
ASXL1	HGNC Symbol	ASXL transcriptional regulator 1 [Source:HGNC Symbol;Acc:HGNC:18318]	nuclear chromatin
ASXL1	HGNC Symbol	ASXL transcriptional regulator 1 [Source:HGNC Symbol;Acc:HGNC:18318]	chromatin binding
ASXL1	HGNC Symbol	ASXL transcriptional regulator 1 [Source:HGNC Symbol;Acc:HGNC:18318]	positive regulation of transcription by RNA polymerase II
ASXL1	HGNC Symbol	ASXL transcriptional regulator 1 [Source:HGNC Symbol;Acc:HGNC:18318]	nucleoplasm
ASXL1	HGNC Symbol	ASXL transcriptional regulator 1 [Source:HGNC Symbol;Acc:HGNC:18318]	animal organ morphogenesis
ASXL1	HGNC Symbol	ASXL transcriptional regulator 1 [Source:HGNC Symbol;Acc:HGNC:18318]	protein deubiquitination
ASXL1	HGNC Symbol	ASXL transcriptional regulator 1 [Source:HGNC Symbol;Acc:HGNC:18318]	retinoic acid receptor binding
ASXL1	HGNC Symbol	ASXL transcriptional regulator 1 [Source:HGNC Symbol;Acc:HGNC:18318]	negative regulation of fat cell differentiation
ASXL1	HGNC Symbol	ASXL transcriptional regulator 1 [Source:HGNC Symbol;Acc:HGNC:18318]	peroxisome proliferator activated receptor binding
ASXL1	HGNC Symbol	ASXL transcriptional regulator 1 [Source:HGNC Symbol;Acc:HGNC:18318]	response to retinoic acid
ASXL1	HGNC Symbol	ASXL transcriptional regulator 1 [Source:HGNC Symbol;Acc:HGNC:18318]	positive regulation of retinoic acid receptor signaling pathway
ASXL1	HGNC Symbol	ASXL transcriptional regulator 1 [Source:HGNC Symbol;Acc:HGNC:18318]	negative regulation of peroxisome proliferator activated receptor signaling pathway
ASXL1	HGNC Symbol	ASXL transcriptional regulator 1 [Source:HGNC Symbol;Acc:HGNC:18318]	monoubiquitinated histone H2A deubiquitination
ASXL1	HGNC Symbol	ASXL transcriptional regulator 1 [Source:HGNC Symbol;Acc:HGNC:18318]	PR-DUB complex
ASXL1	HGNC Symbol	ASXL transcriptional regulator 1 [Source:HGNC Symbol;Acc:HGNC:18318]	cell morphogenesis
ASXL1	HGNC Symbol	ASXL transcriptional regulator 1 [Source:HGNC Symbol;Acc:HGNC:18318]	heart morphogenesis
ASXL1	HGNC Symbol	ASXL transcriptional regulator 1 [Source:HGNC Symbol;Acc:HGNC:18318]	negative regulation of lipid storage
ASXL1	HGNC Symbol	ASXL transcriptional regulator 1 [Source:HGNC Symbol;Acc:HGNC:18318]	hemopoiesis
ASXL1	HGNC Symbol	ASXL transcriptional regulator 1 [Source:HGNC Symbol;Acc:HGNC:18318]	regulation of kidney size
ASXL1	HGNC Symbol	ASXL transcriptional regulator 1 [Source:HGNC Symbol;Acc:HGNC:18318]	hematopoietic or lymphoid organ development
ASXL1	HGNC Symbol	ASXL transcriptional regulator 1 [Source:HGNC Symbol;Acc:HGNC:18318]	thymus development
ASXL1	HGNC Symbol	ASXL transcriptional regulator 1 [Source:HGNC Symbol;Acc:HGNC:18318]	bone marrow development
ASXL1	HGNC Symbol	ASXL transcriptional regulator 1 [Source:HGNC Symbol;Acc:HGNC:18318]	homeostasis of number of cells
ASXL1	HGNC Symbol	ASXL transcriptional regulator 1 [Source:HGNC Symbol;Acc:HGNC:18318]	bone development
ASXL1	HGNC Symbol	ASXL transcriptional regulator 1 [Source:HGNC Symbol;Acc:HGNC:18318]	lung saccule development
ASXL1	HGNC Symbol	ASXL transcriptional regulator 1 [Source:HGNC Symbol;Acc:HGNC:18318]	glomerular visceral epithelial cell development
ASXL1	HGNC Symbol	ASXL transcriptional regulator 1 [Source:HGNC Symbol;Acc:HGNC:18318]
ASXL2	HGNC Symbol	ASXL transcriptional regulator 2 [Source:HGNC Symbol;Acc:HGNC:23805]	DNA binding
ASXL2	HGNC Symbol	ASXL transcriptional regulator 2 [Source:HGNC Symbol;Acc:HGNC:23805]	regulation of transcription, DNA-templated
ASXL2	HGNC Symbol	ASXL transcriptional regulator 2 [Source:HGNC Symbol;Acc:HGNC:23805]	transcription, DNA-templated
ASXL2	HGNC Symbol	ASXL transcriptional regulator 2 [Source:HGNC Symbol;Acc:HGNC:23805]	nucleus
ASXL2	HGNC Symbol	ASXL transcriptional regulator 2 [Source:HGNC Symbol;Acc:HGNC:23805]	metal ion binding
ASXL2	HGNC Symbol	ASXL transcriptional regulator 2 [Source:HGNC Symbol;Acc:HGNC:23805]	nucleoplasm
ASXL2	HGNC Symbol	ASXL transcriptional regulator 2 [Source:HGNC Symbol;Acc:HGNC:23805]	nuclear chromatin
ASXL2	HGNC Symbol	ASXL transcriptional regulator 2 [Source:HGNC Symbol;Acc:HGNC:23805]	chromatin binding
ASXL2	HGNC Symbol	ASXL transcriptional regulator 2 [Source:HGNC Symbol;Acc:HGNC:23805]	positive regulation of transcription by RNA polymerase II
ASXL2	HGNC Symbol	ASXL transcriptional regulator 2 [Source:HGNC Symbol;Acc:HGNC:23805]	animal organ morphogenesis
ASXL2	HGNC Symbol	ASXL transcriptional regulator 2 [Source:HGNC Symbol;Acc:HGNC:23805]	protein deubiquitination
ASXL2	HGNC Symbol	ASXL transcriptional regulator 2 [Source:HGNC Symbol;Acc:HGNC:23805]	positive regulation of fat cell differentiation
ASXL2	HGNC Symbol	ASXL transcriptional regulator 2 [Source:HGNC Symbol;Acc:HGNC:23805]	peroxisome proliferator activated receptor binding
ASXL2	HGNC Symbol	ASXL transcriptional regulator 2 [Source:HGNC Symbol;Acc:HGNC:23805]	positive regulation of peroxisome proliferator activated receptor signaling pathway
ASXL2	HGNC Symbol	ASXL transcriptional regulator 2 [Source:HGNC Symbol;Acc:HGNC:23805]	positive regulation of lipid storage
ASXL2	HGNC Symbol	ASXL transcriptional regulator 2 [Source:HGNC Symbol;Acc:HGNC:23805]	PR-DUB complex
ASXL2	HGNC Symbol	ASXL transcriptional regulator 2 [Source:HGNC Symbol;Acc:HGNC:23805]	protein binding
ASXL2	HGNC Symbol	ASXL transcriptional regulator 2 [Source:HGNC Symbol;Acc:HGNC:23805]
ATR	HGNC Symbol	ATR serine/threonine kinase [Source:HGNC Symbol;Acc:HGNC:882]
ATR	HGNC Symbol	ATR serine/threonine kinase [Source:HGNC Symbol;Acc:HGNC:882]	nucleus
ATR	HGNC Symbol	ATR serine/threonine kinase [Source:HGNC Symbol;Acc:HGNC:882]	protein serine/threonine kinase activity
ATR	HGNC Symbol	ATR serine/threonine kinase [Source:HGNC Symbol;Acc:HGNC:882]	kinase activity
ATR	HGNC Symbol	ATR serine/threonine kinase [Source:HGNC Symbol;Acc:HGNC:882]	transferase activity
ATR	HGNC Symbol	ATR serine/threonine kinase [Source:HGNC Symbol;Acc:HGNC:882]	phosphorylation
ATR	HGNC Symbol	ATR serine/threonine kinase [Source:HGNC Symbol;Acc:HGNC:882]	protein phosphorylation
ATR	HGNC Symbol	ATR serine/threonine kinase [Source:HGNC Symbol;Acc:HGNC:882]	protein binding
ATR	HGNC Symbol	ATR serine/threonine kinase [Source:HGNC Symbol;Acc:HGNC:882]	Golgi apparatus
ATR	HGNC Symbol	ATR serine/threonine kinase [Source:HGNC Symbol;Acc:HGNC:882]	nucleotide binding
ATR	HGNC Symbol	ATR serine/threonine kinase [Source:HGNC Symbol;Acc:HGNC:882]	ATP binding
ATR	HGNC Symbol	ATR serine/threonine kinase [Source:HGNC Symbol;Acc:HGNC:882]	nucleoplasm
ATR	HGNC Symbol	ATR serine/threonine kinase [Source:HGNC Symbol;Acc:HGNC:882]	DNA binding
ATR	HGNC Symbol	ATR serine/threonine kinase [Source:HGNC Symbol;Acc:HGNC:882]	chromosome
ATR	HGNC Symbol	ATR serine/threonine kinase [Source:HGNC Symbol;Acc:HGNC:882]	DNA repair
ATR	HGNC Symbol	ATR serine/threonine kinase [Source:HGNC Symbol;Acc:HGNC:882]	cellular response to DNA damage stimulus
ATR	HGNC Symbol	ATR serine/threonine kinase [Source:HGNC Symbol;Acc:HGNC:882]	PML body
ATR	HGNC Symbol	ATR serine/threonine kinase [Source:HGNC Symbol;Acc:HGNC:882]	replication fork processing
ATR	HGNC Symbol	ATR serine/threonine kinase [Source:HGNC Symbol;Acc:HGNC:882]	nuclear chromosome, telomeric region
ATR	HGNC Symbol	ATR serine/threonine kinase [Source:HGNC Symbol;Acc:HGNC:882]	regulation of cellular response to heat
ATR	HGNC Symbol	ATR serine/threonine kinase [Source:HGNC Symbol;Acc:HGNC:882]	interstrand cross-link repair
ATR	HGNC Symbol	ATR serine/threonine kinase [Source:HGNC Symbol;Acc:HGNC:882]	multicellular organism development
ATR	HGNC Symbol	ATR serine/threonine kinase [Source:HGNC Symbol;Acc:HGNC:882]	regulation of signal transduction by p53 class mediator
ATR	HGNC Symbol	ATR serine/threonine kinase [Source:HGNC Symbol;Acc:HGNC:882]	protein kinase activity
ATR	HGNC Symbol	ATR serine/threonine kinase [Source:HGNC Symbol;Acc:HGNC:882]	DNA replication
ATR	HGNC Symbol	ATR serine/threonine kinase [Source:HGNC Symbol;Acc:HGNC:882]	positive regulation of telomere maintenance via telomerase
ATR	HGNC Symbol	ATR serine/threonine kinase [Source:HGNC Symbol;Acc:HGNC:882]	replicative senescence
ATR	HGNC Symbol	ATR serine/threonine kinase [Source:HGNC Symbol;Acc:HGNC:882]	DNA damage checkpoint
ATR	HGNC Symbol	ATR serine/threonine kinase [Source:HGNC Symbol;Acc:HGNC:882]	peptidyl-serine phosphorylation
ATR	HGNC Symbol	ATR serine/threonine kinase [Source:HGNC Symbol;Acc:HGNC:882]	cellular response to UV
ATR	HGNC Symbol	ATR serine/threonine kinase [Source:HGNC Symbol;Acc:HGNC:882]	telomere maintenance
ATR	HGNC Symbol	ATR serine/threonine kinase [Source:HGNC Symbol;Acc:HGNC:882]	negative regulation of DNA replication
ATR	HGNC Symbol	ATR serine/threonine kinase [Source:HGNC Symbol;Acc:HGNC:882]	protein localization to chromosome, telomeric region
ATR	HGNC Symbol	ATR serine/threonine kinase [Source:HGNC Symbol;Acc:HGNC:882]	protein autophosphorylation
ATR	HGNC Symbol	ATR serine/threonine kinase [Source:HGNC Symbol;Acc:HGNC:882]	positive regulation of DNA damage response, signal transduction by p53 class mediator
ATR	HGNC Symbol	ATR serine/threonine kinase [Source:HGNC Symbol;Acc:HGNC:882]	cellular response to gamma radiation
ATR	HGNC Symbol	ATR serine/threonine kinase [Source:HGNC Symbol;Acc:HGNC:882]	establishment of RNA localization to telomere
ATR	HGNC Symbol	ATR serine/threonine kinase [Source:HGNC Symbol;Acc:HGNC:882]	establishment of protein-containing complex localization to telomere
ATR	HGNC Symbol	ATR serine/threonine kinase [Source:HGNC Symbol;Acc:HGNC:882]	positive regulation of telomerase catalytic core complex assembly
ATR	HGNC Symbol	ATR serine/threonine kinase [Source:HGNC Symbol;Acc:HGNC:882]	MutLalpha complex binding
ATR	HGNC Symbol	ATR serine/threonine kinase [Source:HGNC Symbol;Acc:HGNC:882]	MutSalpha complex binding
ATR	HGNC Symbol	ATR serine/threonine kinase [Source:HGNC Symbol;Acc:HGNC:882]	response to drug
BAP1	HGNC Symbol	BRCA1 associated protein 1 [Source:HGNC Symbol;Acc:HGNC:950]	ubiquitin-dependent protein catabolic process
BAP1	HGNC Symbol	BRCA1 associated protein 1 [Source:HGNC Symbol;Acc:HGNC:950]	thiol-dependent ubiquitin-specific protease activity
BAP1	HGNC Symbol	BRCA1 associated protein 1 [Source:HGNC Symbol;Acc:HGNC:950]	nucleus
BAP1	HGNC Symbol	BRCA1 associated protein 1 [Source:HGNC Symbol;Acc:HGNC:950]	cytoplasm
BAP1	HGNC Symbol	BRCA1 associated protein 1 [Source:HGNC Symbol;Acc:HGNC:950]	nucleoplasm
BAP1	HGNC Symbol	BRCA1 associated protein 1 [Source:HGNC Symbol;Acc:HGNC:950]	cytosol
BAP1	HGNC Symbol	BRCA1 associated protein 1 [Source:HGNC Symbol;Acc:HGNC:950]	peptidase activity
BAP1	HGNC Symbol	BRCA1 associated protein 1 [Source:HGNC Symbol;Acc:HGNC:950]	cysteine-type peptidase activity
BAP1	HGNC Symbol	BRCA1 associated protein 1 [Source:HGNC Symbol;Acc:HGNC:950]	proteolysis
BAP1	HGNC Symbol	BRCA1 associated protein 1 [Source:HGNC Symbol;Acc:HGNC:950]	hydrolase activity
BAP1	HGNC Symbol	BRCA1 associated protein 1 [Source:HGNC Symbol;Acc:HGNC:950]	chromatin organization
BAP1	HGNC Symbol	BRCA1 associated protein 1 [Source:HGNC Symbol;Acc:HGNC:950]	protein binding
BAP1	HGNC Symbol	BRCA1 associated protein 1 [Source:HGNC Symbol;Acc:HGNC:950]	protein deubiquitination
BAP1	HGNC Symbol	BRCA1 associated protein 1 [Source:HGNC Symbol;Acc:HGNC:950]	response to inorganic substance
BAP1	HGNC Symbol	BRCA1 associated protein 1 [Source:HGNC Symbol;Acc:HGNC:950]	regulation of inflammatory response
BAP1	HGNC Symbol	BRCA1 associated protein 1 [Source:HGNC Symbol;Acc:HGNC:950]	macrophage homeostasis
BAP1	HGNC Symbol	BRCA1 associated protein 1 [Source:HGNC Symbol;Acc:HGNC:950]	regulation of cytokine production involved in inflammatory response
BAP1	HGNC Symbol	BRCA1 associated protein 1 [Source:HGNC Symbol;Acc:HGNC:950]	chromatin binding
BAP1	HGNC Symbol	BRCA1 associated protein 1 [Source:HGNC Symbol;Acc:HGNC:950]	protein K48-linked deubiquitination
BAP1	HGNC Symbol	BRCA1 associated protein 1 [Source:HGNC Symbol;Acc:HGNC:950]	regulation of cell cycle
BAP1	HGNC Symbol	BRCA1 associated protein 1 [Source:HGNC Symbol;Acc:HGNC:950]	regulation of cell growth
BAP1	HGNC Symbol	BRCA1 associated protein 1 [Source:HGNC Symbol;Acc:HGNC:950]	negative regulation of transcription, DNA-templated
BAP1	HGNC Symbol	BRCA1 associated protein 1 [Source:HGNC Symbol;Acc:HGNC:950]	cellular protein modification process
BAP1	HGNC Symbol	BRCA1 associated protein 1 [Source:HGNC Symbol;Acc:HGNC:950]	negative regulation of cell population proliferation
BAP1	HGNC Symbol	BRCA1 associated protein 1 [Source:HGNC Symbol;Acc:HGNC:950]	positive regulation of protein targeting to mitochondrion
BAP1	HGNC Symbol	BRCA1 associated protein 1 [Source:HGNC Symbol;Acc:HGNC:950]	monoubiquitinated protein deubiquitination
BAP1	HGNC Symbol	BRCA1 associated protein 1 [Source:HGNC Symbol;Acc:HGNC:950]	monoubiquitinated histone H2A deubiquitination
BAP1	HGNC Symbol	BRCA1 associated protein 1 [Source:HGNC Symbol;Acc:HGNC:950]	PR-DUB complex
BAP1	HGNC Symbol	BRCA1 associated protein 1 [Source:HGNC Symbol;Acc:HGNC:950]
BCAS3	HGNC Symbol	BCAS3 microtubule associated cell migration factor [Source:HGNC Symbol;Acc:HGNC:14347]
BCAS3	HGNC Symbol	BCAS3 microtubule associated cell migration factor [Source:HGNC Symbol;Acc:HGNC:14347]	protein binding
BCAS3	HGNC Symbol	BCAS3 microtubule associated cell migration factor [Source:HGNC Symbol;Acc:HGNC:14347]	nucleus
BCAS3	HGNC Symbol	BCAS3 microtubule associated cell migration factor [Source:HGNC Symbol;Acc:HGNC:14347]	cytoplasm
BCAS3	HGNC Symbol	BCAS3 microtubule associated cell migration factor [Source:HGNC Symbol;Acc:HGNC:14347]	cytoskeleton
BCAS3	HGNC Symbol	BCAS3 microtubule associated cell migration factor [Source:HGNC Symbol;Acc:HGNC:14347]	angiogenesis
BCAS3	HGNC Symbol	BCAS3 microtubule associated cell migration factor [Source:HGNC Symbol;Acc:HGNC:14347]	positive regulation of GTPase activity
BCAS3	HGNC Symbol	BCAS3 microtubule associated cell migration factor [Source:HGNC Symbol;Acc:HGNC:14347]	positive regulation of transcription by RNA polymerase II
BCAS3	HGNC Symbol	BCAS3 microtubule associated cell migration factor [Source:HGNC Symbol;Acc:HGNC:14347]	regulation of establishment of cell polarity
BCAS3	HGNC Symbol	BCAS3 microtubule associated cell migration factor [Source:HGNC Symbol;Acc:HGNC:14347]	cell leading edge
BCAS3	HGNC Symbol	BCAS3 microtubule associated cell migration factor [Source:HGNC Symbol;Acc:HGNC:14347]	chromatin binding
BCAS3	HGNC Symbol	BCAS3 microtubule associated cell migration factor [Source:HGNC Symbol;Acc:HGNC:14347]	activation of GTPase activity
BCAS3	HGNC Symbol	BCAS3 microtubule associated cell migration factor [Source:HGNC Symbol;Acc:HGNC:14347]	transcription factor binding
BCAS3	HGNC Symbol	BCAS3 microtubule associated cell migration factor [Source:HGNC Symbol;Acc:HGNC:14347]	histone binding
BCAS3	HGNC Symbol	BCAS3 microtubule associated cell migration factor [Source:HGNC Symbol;Acc:HGNC:14347]	positive regulation of filopodium assembly
BCAS3	HGNC Symbol	BCAS3 microtubule associated cell migration factor [Source:HGNC Symbol;Acc:HGNC:14347]	positive regulation of endothelial cell migration
BCAS3	HGNC Symbol	BCAS3 microtubule associated cell migration factor [Source:HGNC Symbol;Acc:HGNC:14347]	tube formation
BCAS3	HGNC Symbol	BCAS3 microtubule associated cell migration factor [Source:HGNC Symbol;Acc:HGNC:14347]	negative regulation of focal adhesion assembly
BCAS3	HGNC Symbol	BCAS3 microtubule associated cell migration factor [Source:HGNC Symbol;Acc:HGNC:14347]	acetyltransferase activator activity
BCAS3	HGNC Symbol	BCAS3 microtubule associated cell migration factor [Source:HGNC Symbol;Acc:HGNC:14347]	beta-tubulin binding
BCAS3	HGNC Symbol	BCAS3 microtubule associated cell migration factor [Source:HGNC Symbol;Acc:HGNC:14347]	Golgi organization
BCAS3	HGNC Symbol	BCAS3 microtubule associated cell migration factor [Source:HGNC Symbol;Acc:HGNC:14347]	positive regulation of intracellular protein transport
BCAS3	HGNC Symbol	BCAS3 microtubule associated cell migration factor [Source:HGNC Symbol;Acc:HGNC:14347]	cytoplasmic microtubule
BCAS3	HGNC Symbol	BCAS3 microtubule associated cell migration factor [Source:HGNC Symbol;Acc:HGNC:14347]	cellular response to estrogen stimulus
BCAS3	HGNC Symbol	BCAS3 microtubule associated cell migration factor [Source:HGNC Symbol;Acc:HGNC:14347]	nuclear hormone receptor binding
BCAS3	HGNC Symbol	BCAS3 microtubule associated cell migration factor [Source:HGNC Symbol;Acc:HGNC:14347]	response to starvation
BCAS3	HGNC Symbol	BCAS3 microtubule associated cell migration factor [Source:HGNC Symbol;Acc:HGNC:14347]	microtubule organizing center organization
BCAS3	HGNC Symbol	BCAS3 microtubule associated cell migration factor [Source:HGNC Symbol;Acc:HGNC:14347]	transcriptionally active chromatin
BCAS3	HGNC Symbol	BCAS3 microtubule associated cell migration factor [Source:HGNC Symbol;Acc:HGNC:14347]	positive regulation of catalytic activity
BCAS3	HGNC Symbol	BCAS3 microtubule associated cell migration factor [Source:HGNC Symbol;Acc:HGNC:14347]	histone acetyltransferase binding
BCAS3	HGNC Symbol	BCAS3 microtubule associated cell migration factor [Source:HGNC Symbol;Acc:HGNC:14347]	positive regulation of actin cytoskeleton reorganization
BCAS3	HGNC Symbol	BCAS3 microtubule associated cell migration factor [Source:HGNC Symbol;Acc:HGNC:14347]	intermediate filament cytoskeleton
BCAS3	HGNC Symbol	BCAS3 microtubule associated cell migration factor [Source:HGNC Symbol;Acc:HGNC:14347]	negative regulation of GTPase activity
BCAS3	HGNC Symbol	BCAS3 microtubule associated cell migration factor [Source:HGNC Symbol;Acc:HGNC:14347]	cell periphery
BIRC6	HGNC Symbol	baculoviral IAP repeat containing 6 [Source:HGNC Symbol;Acc:HGNC:13516]	ubiquitin-protein transferase activity
BIRC6	HGNC Symbol	baculoviral IAP repeat containing 6 [Source:HGNC Symbol;Acc:HGNC:13516]	apoptotic process
BIRC6	HGNC Symbol	baculoviral IAP repeat containing 6 [Source:HGNC Symbol;Acc:HGNC:13516]	regulation of cytokinesis
BIRC6	HGNC Symbol	baculoviral IAP repeat containing 6 [Source:HGNC Symbol;Acc:HGNC:13516]	cytoplasm
BIRC6	HGNC Symbol	baculoviral IAP repeat containing 6 [Source:HGNC Symbol;Acc:HGNC:13516]	membrane
BIRC6	HGNC Symbol	baculoviral IAP repeat containing 6 [Source:HGNC Symbol;Acc:HGNC:13516]	transferase activity
BIRC6	HGNC Symbol	baculoviral IAP repeat containing 6 [Source:HGNC Symbol;Acc:HGNC:13516]	cell cycle
BIRC6	HGNC Symbol	baculoviral IAP repeat containing 6 [Source:HGNC Symbol;Acc:HGNC:13516]	negative regulation of apoptotic process
BIRC6	HGNC Symbol	baculoviral IAP repeat containing 6 [Source:HGNC Symbol;Acc:HGNC:13516]	cytoskeleton
BIRC6	HGNC Symbol	baculoviral IAP repeat containing 6 [Source:HGNC Symbol;Acc:HGNC:13516]	Golgi apparatus
BIRC6	HGNC Symbol	baculoviral IAP repeat containing 6 [Source:HGNC Symbol;Acc:HGNC:13516]	endosome
BIRC6	HGNC Symbol	baculoviral IAP repeat containing 6 [Source:HGNC Symbol;Acc:HGNC:13516]	protein ubiquitination
BIRC6	HGNC Symbol	baculoviral IAP repeat containing 6 [Source:HGNC Symbol;Acc:HGNC:13516]	cell division
BIRC6	HGNC Symbol	baculoviral IAP repeat containing 6 [Source:HGNC Symbol;Acc:HGNC:13516]	negative regulation of endopeptidase activity
BIRC6	HGNC Symbol	baculoviral IAP repeat containing 6 [Source:HGNC Symbol;Acc:HGNC:13516]	protein binding
BIRC6	HGNC Symbol	baculoviral IAP repeat containing 6 [Source:HGNC Symbol;Acc:HGNC:13516]	microtubule organizing center
BIRC6	HGNC Symbol	baculoviral IAP repeat containing 6 [Source:HGNC Symbol;Acc:HGNC:13516]	midbody
BIRC6	HGNC Symbol	baculoviral IAP repeat containing 6 [Source:HGNC Symbol;Acc:HGNC:13516]	nucleus
BIRC6	HGNC Symbol	baculoviral IAP repeat containing 6 [Source:HGNC Symbol;Acc:HGNC:13516]	spindle pole
BIRC6	HGNC Symbol	baculoviral IAP repeat containing 6 [Source:HGNC Symbol;Acc:HGNC:13516]	peptidase inhibitor activity
BIRC6	HGNC Symbol	baculoviral IAP repeat containing 6 [Source:HGNC Symbol;Acc:HGNC:13516]	negative regulation of peptidase activity
BIRC6	HGNC Symbol	baculoviral IAP repeat containing 6 [Source:HGNC Symbol;Acc:HGNC:13516]	cysteine-type endopeptidase inhibitor activity
BIRC6	HGNC Symbol	baculoviral IAP repeat containing 6 [Source:HGNC Symbol;Acc:HGNC:13516]	ubiquitin conjugating enzyme activity
BIRC6	HGNC Symbol	baculoviral IAP repeat containing 6 [Source:HGNC Symbol;Acc:HGNC:13516]	ubiquitin-dependent protein catabolic process
BIRC6	HGNC Symbol	baculoviral IAP repeat containing 6 [Source:HGNC Symbol;Acc:HGNC:13516]	trans-Golgi network
BIRC6	HGNC Symbol	baculoviral IAP repeat containing 6 [Source:HGNC Symbol;Acc:HGNC:13516]	regulation of cell population proliferation
BIRC6	HGNC Symbol	baculoviral IAP repeat containing 6 [Source:HGNC Symbol;Acc:HGNC:13516]	Flemming body
BIRC6	HGNC Symbol	baculoviral IAP repeat containing 6 [Source:HGNC Symbol;Acc:HGNC:13516]	protein phosphorylation
BIRC6	HGNC Symbol	baculoviral IAP repeat containing 6 [Source:HGNC Symbol;Acc:HGNC:13516]	negative regulation of extrinsic apoptotic signaling pathway
BIRC6	HGNC Symbol	baculoviral IAP repeat containing 6 [Source:HGNC Symbol;Acc:HGNC:13516]	placenta development
BIRC6	HGNC Symbol	baculoviral IAP repeat containing 6 [Source:HGNC Symbol;Acc:HGNC:13516]	positive regulation of cell population proliferation
BIRC6	HGNC Symbol	baculoviral IAP repeat containing 6 [Source:HGNC Symbol;Acc:HGNC:13516]	labyrinthine layer development
BIRC6	HGNC Symbol	baculoviral IAP repeat containing 6 [Source:HGNC Symbol;Acc:HGNC:13516]	spongiotrophoblast layer development
BIRC6	HGNC Symbol	baculoviral IAP repeat containing 6 [Source:HGNC Symbol;Acc:HGNC:13516]
BRAF	HGNC Symbol	B-Raf proto-oncogene, serine/threonine kinase [Source:HGNC Symbol;Acc:HGNC:1097]	ATP binding
BRAF	HGNC Symbol	B-Raf proto-oncogene, serine/threonine kinase [Source:HGNC Symbol;Acc:HGNC:1097]	signal transduction
BRAF	HGNC Symbol	B-Raf proto-oncogene, serine/threonine kinase [Source:HGNC Symbol;Acc:HGNC:1097]	protein phosphorylation
BRAF	HGNC Symbol	B-Raf proto-oncogene, serine/threonine kinase [Source:HGNC Symbol;Acc:HGNC:1097]	intracellular signal transduction
BRAF	HGNC Symbol	B-Raf proto-oncogene, serine/threonine kinase [Source:HGNC Symbol;Acc:HGNC:1097]	protein kinase activity
BRAF	HGNC Symbol	B-Raf proto-oncogene, serine/threonine kinase [Source:HGNC Symbol;Acc:HGNC:1097]	intracellular membrane-bounded organelle
BRAF	HGNC Symbol	B-Raf proto-oncogene, serine/threonine kinase [Source:HGNC Symbol;Acc:HGNC:1097]	nucleotide binding
BRAF	HGNC Symbol	B-Raf proto-oncogene, serine/threonine kinase [Source:HGNC Symbol;Acc:HGNC:1097]	protein serine/threonine kinase activity
BRAF	HGNC Symbol	B-Raf proto-oncogene, serine/threonine kinase [Source:HGNC Symbol;Acc:HGNC:1097]
BRAF	HGNC Symbol	B-Raf proto-oncogene, serine/threonine kinase [Source:HGNC Symbol;Acc:HGNC:1097]	cytosol
BRAF	HGNC Symbol	B-Raf proto-oncogene, serine/threonine kinase [Source:HGNC Symbol;Acc:HGNC:1097]	MAPK cascade
BRAF	HGNC Symbol	B-Raf proto-oncogene, serine/threonine kinase [Source:HGNC Symbol;Acc:HGNC:1097]	activation of MAPKK activity
BRAF	HGNC Symbol	B-Raf proto-oncogene, serine/threonine kinase [Source:HGNC Symbol;Acc:HGNC:1097]	MAP kinase kinase kinase activity
BRAF	HGNC Symbol	B-Raf proto-oncogene, serine/threonine kinase [Source:HGNC Symbol;Acc:HGNC:1097]	Ras GTPase binding
BRAF	HGNC Symbol	B-Raf proto-oncogene, serine/threonine kinase [Source:HGNC Symbol;Acc:HGNC:1097]	mitogen-activated protein kinase kinase binding
BRAF	HGNC Symbol	B-Raf proto-oncogene, serine/threonine kinase [Source:HGNC Symbol;Acc:HGNC:1097]	protein-containing complex binding
BRAF	HGNC Symbol	B-Raf proto-oncogene, serine/threonine kinase [Source:HGNC Symbol;Acc:HGNC:1097]	myeloid progenitor cell differentiation
BRAF	HGNC Symbol	B-Raf proto-oncogene, serine/threonine kinase [Source:HGNC Symbol;Acc:HGNC:1097]	visual learning
BRAF	HGNC Symbol	B-Raf proto-oncogene, serine/threonine kinase [Source:HGNC Symbol;Acc:HGNC:1097]	positive regulation of gene expression
BRAF	HGNC Symbol	B-Raf proto-oncogene, serine/threonine kinase [Source:HGNC Symbol;Acc:HGNC:1097]	negative regulation of fibroblast migration
BRAF	HGNC Symbol	B-Raf proto-oncogene, serine/threonine kinase [Source:HGNC Symbol;Acc:HGNC:1097]	cell differentiation
BRAF	HGNC Symbol	B-Raf proto-oncogene, serine/threonine kinase [Source:HGNC Symbol;Acc:HGNC:1097]	thyroid gland development
BRAF	HGNC Symbol	B-Raf proto-oncogene, serine/threonine kinase [Source:HGNC Symbol;Acc:HGNC:1097]	somatic stem cell population maintenance
BRAF	HGNC Symbol	B-Raf proto-oncogene, serine/threonine kinase [Source:HGNC Symbol;Acc:HGNC:1097]	cellular response to drug
BRAF	HGNC Symbol	B-Raf proto-oncogene, serine/threonine kinase [Source:HGNC Symbol;Acc:HGNC:1097]	regulation of cell population proliferation
BRAF	HGNC Symbol	B-Raf proto-oncogene, serine/threonine kinase [Source:HGNC Symbol;Acc:HGNC:1097]	CD4-positive, alpha-beta T cell differentiation
BRAF	HGNC Symbol	B-Raf proto-oncogene, serine/threonine kinase [Source:HGNC Symbol;Acc:HGNC:1097]	positive T cell selection
BRAF	HGNC Symbol	B-Raf proto-oncogene, serine/threonine kinase [Source:HGNC Symbol;Acc:HGNC:1097]	CD4-positive or CD8-positive, alpha-beta T cell lineage commitment
BRAF	HGNC Symbol	B-Raf proto-oncogene, serine/threonine kinase [Source:HGNC Symbol;Acc:HGNC:1097]	response to peptide hormone
BRAF	HGNC Symbol	B-Raf proto-oncogene, serine/threonine kinase [Source:HGNC Symbol;Acc:HGNC:1097]	negative regulation of neuron apoptotic process
BRAF	HGNC Symbol	B-Raf proto-oncogene, serine/threonine kinase [Source:HGNC Symbol;Acc:HGNC:1097]	regulation of T cell differentiation
BRAF	HGNC Symbol	B-Raf proto-oncogene, serine/threonine kinase [Source:HGNC Symbol;Acc:HGNC:1097]	alpha-beta T cell differentiation
BRAF	HGNC Symbol	B-Raf proto-oncogene, serine/threonine kinase [Source:HGNC Symbol;Acc:HGNC:1097]	thymus development
BRAF	HGNC Symbol	B-Raf proto-oncogene, serine/threonine kinase [Source:HGNC Symbol;Acc:HGNC:1097]	regulation of axon regeneration
BRAF	HGNC Symbol	B-Raf proto-oncogene, serine/threonine kinase [Source:HGNC Symbol;Acc:HGNC:1097]	positive regulation of axon regeneration
BRAF	HGNC Symbol	B-Raf proto-oncogene, serine/threonine kinase [Source:HGNC Symbol;Acc:HGNC:1097]	positive regulation of axonogenesis
BRAF	HGNC Symbol	B-Raf proto-oncogene, serine/threonine kinase [Source:HGNC Symbol;Acc:HGNC:1097]	T cell receptor signaling pathway
BRAF	HGNC Symbol	B-Raf proto-oncogene, serine/threonine kinase [Source:HGNC Symbol;Acc:HGNC:1097]	positive regulation of stress fiber assembly
BRAF	HGNC Symbol	B-Raf proto-oncogene, serine/threonine kinase [Source:HGNC Symbol;Acc:HGNC:1097]	response to cAMP
BRAF	HGNC Symbol	B-Raf proto-oncogene, serine/threonine kinase [Source:HGNC Symbol;Acc:HGNC:1097]	long-term synaptic potentiation
BRAF	HGNC Symbol	B-Raf proto-oncogene, serine/threonine kinase [Source:HGNC Symbol;Acc:HGNC:1097]	head morphogenesis
BRAF	HGNC Symbol	B-Raf proto-oncogene, serine/threonine kinase [Source:HGNC Symbol;Acc:HGNC:1097]	face development
BRAF	HGNC Symbol	B-Raf proto-oncogene, serine/threonine kinase [Source:HGNC Symbol;Acc:HGNC:1097]	positive regulation of ERK1 and ERK2 cascade
BRAF	HGNC Symbol	B-Raf proto-oncogene, serine/threonine kinase [Source:HGNC Symbol;Acc:HGNC:1097]	positive regulation of substrate adhesion-dependent cell spreading
BRAF	HGNC Symbol	B-Raf proto-oncogene, serine/threonine kinase [Source:HGNC Symbol;Acc:HGNC:1097]	cellular response to nerve growth factor stimulus
BRAF	HGNC Symbol	B-Raf proto-oncogene, serine/threonine kinase [Source:HGNC Symbol;Acc:HGNC:1097]	negative regulation of synaptic vesicle exocytosis
BRAF	HGNC Symbol	B-Raf proto-oncogene, serine/threonine kinase [Source:HGNC Symbol;Acc:HGNC:1097]	negative regulation of endothelial cell apoptotic process
BRAF	HGNC Symbol	B-Raf proto-oncogene, serine/threonine kinase [Source:HGNC Symbol;Acc:HGNC:1097]	nucleus
BRAF	HGNC Symbol	B-Raf proto-oncogene, serine/threonine kinase [Source:HGNC Symbol;Acc:HGNC:1097]	cytoplasm
BRAF	HGNC Symbol	B-Raf proto-oncogene, serine/threonine kinase [Source:HGNC Symbol;Acc:HGNC:1097]	mitochondrion
BRAF	HGNC Symbol	B-Raf proto-oncogene, serine/threonine kinase [Source:HGNC Symbol;Acc:HGNC:1097]	plasma membrane
BRAF	HGNC Symbol	B-Raf proto-oncogene, serine/threonine kinase [Source:HGNC Symbol;Acc:HGNC:1097]	membrane
BRAF	HGNC Symbol	B-Raf proto-oncogene, serine/threonine kinase [Source:HGNC Symbol;Acc:HGNC:1097]	neuron projection
BRAF	HGNC Symbol	B-Raf proto-oncogene, serine/threonine kinase [Source:HGNC Symbol;Acc:HGNC:1097]	cell body
BRAF	HGNC Symbol	B-Raf proto-oncogene, serine/threonine kinase [Source:HGNC Symbol;Acc:HGNC:1097]	metal ion binding
BRAF	HGNC Symbol	B-Raf proto-oncogene, serine/threonine kinase [Source:HGNC Symbol;Acc:HGNC:1097]	kinase activity
BRAF	HGNC Symbol	B-Raf proto-oncogene, serine/threonine kinase [Source:HGNC Symbol;Acc:HGNC:1097]	transferase activity
BRAF	HGNC Symbol	B-Raf proto-oncogene, serine/threonine kinase [Source:HGNC Symbol;Acc:HGNC:1097]	phosphorylation
BRAF	HGNC Symbol	B-Raf proto-oncogene, serine/threonine kinase [Source:HGNC Symbol;Acc:HGNC:1097]	negative regulation of apoptotic process
BRAF	HGNC Symbol	B-Raf proto-oncogene, serine/threonine kinase [Source:HGNC Symbol;Acc:HGNC:1097]	catalytic activity
BRAF	HGNC Symbol	B-Raf proto-oncogene, serine/threonine kinase [Source:HGNC Symbol;Acc:HGNC:1097]	metabolic process
BRAF	HGNC Symbol	B-Raf proto-oncogene, serine/threonine kinase [Source:HGNC Symbol;Acc:HGNC:1097]	protein binding
BRAF	HGNC Symbol	B-Raf proto-oncogene, serine/threonine kinase [Source:HGNC Symbol;Acc:HGNC:1097]	identical protein binding
BRAF	HGNC Symbol	B-Raf proto-oncogene, serine/threonine kinase [Source:HGNC Symbol;Acc:HGNC:1097]	positive regulation of peptidyl-serine phosphorylation
BRAF	HGNC Symbol	B-Raf proto-oncogene, serine/threonine kinase [Source:HGNC Symbol;Acc:HGNC:1097]	scaffold protein binding
BRAF	HGNC Symbol	B-Raf proto-oncogene, serine/threonine kinase [Source:HGNC Symbol;Acc:HGNC:1097]	animal organ morphogenesis
BRAF	HGNC Symbol	B-Raf proto-oncogene, serine/threonine kinase [Source:HGNC Symbol;Acc:HGNC:1097]	calcium ion binding
BRAF	HGNC Symbol	B-Raf proto-oncogene, serine/threonine kinase [Source:HGNC Symbol;Acc:HGNC:1097]	epidermal growth factor receptor signaling pathway
BRAF	HGNC Symbol	B-Raf proto-oncogene, serine/threonine kinase [Source:HGNC Symbol;Acc:HGNC:1097]	positive regulation of glucose transmembrane transport
BRAF	HGNC Symbol	B-Raf proto-oncogene, serine/threonine kinase [Source:HGNC Symbol;Acc:HGNC:1097]	trehalose metabolism in response to stress
BRAF	HGNC Symbol	B-Raf proto-oncogene, serine/threonine kinase [Source:HGNC Symbol;Acc:HGNC:1097]	cellular response to calcium ion
BRAF	HGNC Symbol	B-Raf proto-oncogene, serine/threonine kinase [Source:HGNC Symbol;Acc:HGNC:1097]	establishment of protein localization to membrane
BRAF	HGNC Symbol	B-Raf proto-oncogene, serine/threonine kinase [Source:HGNC Symbol;Acc:HGNC:1097]	protein tyrosine kinase activity
BRAF	HGNC Symbol	B-Raf proto-oncogene, serine/threonine kinase [Source:HGNC Symbol;Acc:HGNC:1097]	peptidyl-tyrosine phosphorylation
BRCA1	HGNC Symbol	BRCA1 DNA repair associated [Source:HGNC Symbol;Acc:HGNC:1100]	DNA binding
BRCA1	HGNC Symbol	BRCA1 DNA repair associated [Source:HGNC Symbol;Acc:HGNC:1100]	zinc ion binding
BRCA1	HGNC Symbol	BRCA1 DNA repair associated [Source:HGNC Symbol;Acc:HGNC:1100]	nucleus
BRCA1	HGNC Symbol	BRCA1 DNA repair associated [Source:HGNC Symbol;Acc:HGNC:1100]	metal ion binding
BRCA1	HGNC Symbol	BRCA1 DNA repair associated [Source:HGNC Symbol;Acc:HGNC:1100]	DNA repair
BRCA1	HGNC Symbol	BRCA1 DNA repair associated [Source:HGNC Symbol;Acc:HGNC:1100]	ubiquitin-protein transferase activity
BRCA1	HGNC Symbol	BRCA1 DNA repair associated [Source:HGNC Symbol;Acc:HGNC:1100]	cellular response to DNA damage stimulus
BRCA1	HGNC Symbol	BRCA1 DNA repair associated [Source:HGNC Symbol;Acc:HGNC:1100]	positive regulation of gene expression
BRCA1	HGNC Symbol	BRCA1 DNA repair associated [Source:HGNC Symbol;Acc:HGNC:1100]	positive regulation of angiogenesis
BRCA1	HGNC Symbol	BRCA1 DNA repair associated [Source:HGNC Symbol;Acc:HGNC:1100]	positive regulation of cell cycle arrest
BRCA1	HGNC Symbol	BRCA1 DNA repair associated [Source:HGNC Symbol;Acc:HGNC:1100]	positive regulation of transcription by RNA polymerase II
BRCA1	HGNC Symbol	BRCA1 DNA repair associated [Source:HGNC Symbol;Acc:HGNC:1100]	cellular response to tumor necrosis factor
BRCA1	HGNC Symbol	BRCA1 DNA repair associated [Source:HGNC Symbol;Acc:HGNC:1100]	transcription regulatory region sequence-specific DNA binding
BRCA1	HGNC Symbol	BRCA1 DNA repair associated [Source:HGNC Symbol;Acc:HGNC:1100]	cytoplasm
BRCA1	HGNC Symbol	BRCA1 DNA repair associated [Source:HGNC Symbol;Acc:HGNC:1100]	transferase activity
BRCA1	HGNC Symbol	BRCA1 DNA repair associated [Source:HGNC Symbol;Acc:HGNC:1100]	cell cycle
BRCA1	HGNC Symbol	BRCA1 DNA repair associated [Source:HGNC Symbol;Acc:HGNC:1100]	nucleoplasm
BRCA1	HGNC Symbol	BRCA1 DNA repair associated [Source:HGNC Symbol;Acc:HGNC:1100]	protein ubiquitination
BRCA1	HGNC Symbol	BRCA1 DNA repair associated [Source:HGNC Symbol;Acc:HGNC:1100]	apoptotic process
BRCA1	HGNC Symbol	BRCA1 DNA repair associated [Source:HGNC Symbol;Acc:HGNC:1100]	lipid metabolic process
BRCA1	HGNC Symbol	BRCA1 DNA repair associated [Source:HGNC Symbol;Acc:HGNC:1100]	fatty acid metabolic process
BRCA1	HGNC Symbol	BRCA1 DNA repair associated [Source:HGNC Symbol;Acc:HGNC:1100]	chromosome
BRCA1	HGNC Symbol	BRCA1 DNA repair associated [Source:HGNC Symbol;Acc:HGNC:1100]	fatty acid biosynthetic process
BRCA1	HGNC Symbol	BRCA1 DNA repair associated [Source:HGNC Symbol;Acc:HGNC:1100]	protein binding
BRCA1	HGNC Symbol	BRCA1 DNA repair associated [Source:HGNC Symbol;Acc:HGNC:1100]	DNA recombination
BRCA1	HGNC Symbol	BRCA1 DNA repair associated [Source:HGNC Symbol;Acc:HGNC:1100]	protein autoubiquitination
BRCA1	HGNC Symbol	BRCA1 DNA repair associated [Source:HGNC Symbol;Acc:HGNC:1100]	protein K6-linked ubiquitination
BRCA1	HGNC Symbol	BRCA1 DNA repair associated [Source:HGNC Symbol;Acc:HGNC:1100]	BRCA1-BARD1 complex
BRCA1	HGNC Symbol	BRCA1 DNA repair associated [Source:HGNC Symbol;Acc:HGNC:1100]	nuclear body
BRCA1	HGNC Symbol	BRCA1 DNA repair associated [Source:HGNC Symbol;Acc:HGNC:1100]	chromosome segregation
BRCA1	HGNC Symbol	BRCA1 DNA repair associated [Source:HGNC Symbol;Acc:HGNC:1100]	double-strand break repair
BRCA1	HGNC Symbol	BRCA1 DNA repair associated [Source:HGNC Symbol;Acc:HGNC:1100]	transcription coactivator activity
BRCA1	HGNC Symbol	BRCA1 DNA repair associated [Source:HGNC Symbol;Acc:HGNC:1100]	positive regulation of transcription, DNA-templated
BRCA1	HGNC Symbol	BRCA1 DNA repair associated [Source:HGNC Symbol;Acc:HGNC:1100]	plasma membrane
BRCA1	HGNC Symbol	BRCA1 DNA repair associated [Source:HGNC Symbol;Acc:HGNC:1100]	identical protein binding
BRCA1	HGNC Symbol	BRCA1 DNA repair associated [Source:HGNC Symbol;Acc:HGNC:1100]	protein deubiquitination
BRCA1	HGNC Symbol	BRCA1 DNA repair associated [Source:HGNC Symbol;Acc:HGNC:1100]	protein-containing complex
BRCA1	HGNC Symbol	BRCA1 DNA repair associated [Source:HGNC Symbol;Acc:HGNC:1100]	regulation of transcription by RNA polymerase II
BRCA1	HGNC Symbol	BRCA1 DNA repair associated [Source:HGNC Symbol;Acc:HGNC:1100]	positive regulation of DNA repair
BRCA1	HGNC Symbol	BRCA1 DNA repair associated [Source:HGNC Symbol;Acc:HGNC:1100]	ubiquitin protein ligase binding
BRCA1	HGNC Symbol	BRCA1 DNA repair associated [Source:HGNC Symbol;Acc:HGNC:1100]	positive regulation of protein ubiquitination
BRCA1	HGNC Symbol	BRCA1 DNA repair associated [Source:HGNC Symbol;Acc:HGNC:1100]	enzyme binding
BRCA1	HGNC Symbol	BRCA1 DNA repair associated [Source:HGNC Symbol;Acc:HGNC:1100]	regulation of cell population proliferation
BRCA1	HGNC Symbol	BRCA1 DNA repair associated [Source:HGNC Symbol;Acc:HGNC:1100]	regulation of apoptotic process
BRCA1	HGNC Symbol	BRCA1 DNA repair associated [Source:HGNC Symbol;Acc:HGNC:1100]	negative regulation of transcription, DNA-templated
BRCA1	HGNC Symbol	BRCA1 DNA repair associated [Source:HGNC Symbol;Acc:HGNC:1100]	regulation of signal transduction by p53 class mediator
BRCA1	HGNC Symbol	BRCA1 DNA repair associated [Source:HGNC Symbol;Acc:HGNC:1100]	DNA replication
BRCA1	HGNC Symbol	BRCA1 DNA repair associated [Source:HGNC Symbol;Acc:HGNC:1100]	negative regulation of G0 to G1 transition
BRCA1	HGNC Symbol	BRCA1 DNA repair associated [Source:HGNC Symbol;Acc:HGNC:1100]	tubulin binding
BRCA1	HGNC Symbol	BRCA1 DNA repair associated [Source:HGNC Symbol;Acc:HGNC:1100]	ubiquitin ligase complex
BRCA1	HGNC Symbol	BRCA1 DNA repair associated [Source:HGNC Symbol;Acc:HGNC:1100]	response to estrogen
BRCA1	HGNC Symbol	BRCA1 DNA repair associated [Source:HGNC Symbol;Acc:HGNC:1100]	signal transduction involved in G2 DNA damage checkpoint
BRCA1	HGNC Symbol	BRCA1 DNA repair associated [Source:HGNC Symbol;Acc:HGNC:1100]	ribonucleoprotein complex
BRCA1	HGNC Symbol	BRCA1 DNA repair associated [Source:HGNC Symbol;Acc:HGNC:1100]	double-strand break repair via homologous recombination
BRCA1	HGNC Symbol	BRCA1 DNA repair associated [Source:HGNC Symbol;Acc:HGNC:1100]	negative regulation of extrinsic apoptotic signaling pathway via death domain receptors
BRCA1	HGNC Symbol	BRCA1 DNA repair associated [Source:HGNC Symbol;Acc:HGNC:1100]	intrinsic apoptotic signaling pathway in response to DNA damage
BRCA1	HGNC Symbol	BRCA1 DNA repair associated [Source:HGNC Symbol;Acc:HGNC:1100]	RNA polymerase binding
BRCA1	HGNC Symbol	BRCA1 DNA repair associated [Source:HGNC Symbol;Acc:HGNC:1100]	DNA double-strand break processing
BRCA1	HGNC Symbol	BRCA1 DNA repair associated [Source:HGNC Symbol;Acc:HGNC:1100]	double-strand break repair via nonhomologous end joining
BRCA1	HGNC Symbol	BRCA1 DNA repair associated [Source:HGNC Symbol;Acc:HGNC:1100]	negative regulation of fatty acid biosynthetic process
BRCA1	HGNC Symbol	BRCA1 DNA repair associated [Source:HGNC Symbol;Acc:HGNC:1100]	positive regulation of histone acetylation
BRCA1	HGNC Symbol	BRCA1 DNA repair associated [Source:HGNC Symbol;Acc:HGNC:1100]	response to ionizing radiation
BRCA1	HGNC Symbol	BRCA1 DNA repair associated [Source:HGNC Symbol;Acc:HGNC:1100]	RNA binding
BRCA1	HGNC Symbol	BRCA1 DNA repair associated [Source:HGNC Symbol;Acc:HGNC:1100]	negative regulation of centriole replication
BRCA1	HGNC Symbol	BRCA1 DNA repair associated [Source:HGNC Symbol;Acc:HGNC:1100]	positive regulation of vascular endothelial growth factor production
BRCA1	HGNC Symbol	BRCA1 DNA repair associated [Source:HGNC Symbol;Acc:HGNC:1100]	DNA damage response, signal transduction by p53 class mediator resulting in transcription of p21 class mediator
BRCA1	HGNC Symbol	BRCA1 DNA repair associated [Source:HGNC Symbol;Acc:HGNC:1100]	cellular response to indole-3-methanol
BRCA1	HGNC Symbol	BRCA1 DNA repair associated [Source:HGNC Symbol;Acc:HGNC:1100]	positive regulation of histone H3-K4 methylation
BRCA1	HGNC Symbol	BRCA1 DNA repair associated [Source:HGNC Symbol;Acc:HGNC:1100]	postreplication repair
BRCA1	HGNC Symbol	BRCA1 DNA repair associated [Source:HGNC Symbol;Acc:HGNC:1100]	regulation of transcription by RNA polymerase III
BRCA1	HGNC Symbol	BRCA1 DNA repair associated [Source:HGNC Symbol;Acc:HGNC:1100]	dosage compensation by inactivation of X chromosome
BRCA1	HGNC Symbol	BRCA1 DNA repair associated [Source:HGNC Symbol;Acc:HGNC:1100]	negative regulation of intracellular estrogen receptor signaling pathway
BRCA1	HGNC Symbol	BRCA1 DNA repair associated [Source:HGNC Symbol;Acc:HGNC:1100]	negative regulation of histone acetylation
BRCA1	HGNC Symbol	BRCA1 DNA repair associated [Source:HGNC Symbol;Acc:HGNC:1100]	chordate embryonic development
BRCA1	HGNC Symbol	BRCA1 DNA repair associated [Source:HGNC Symbol;Acc:HGNC:1100]	negative regulation of histone H3-K9 methylation
BRCA1	HGNC Symbol	BRCA1 DNA repair associated [Source:HGNC Symbol;Acc:HGNC:1100]	positive regulation of histone H4-K20 methylation
BRCA1	HGNC Symbol	BRCA1 DNA repair associated [Source:HGNC Symbol;Acc:HGNC:1100]	negative regulation of reactive oxygen species metabolic process
BRCA1	HGNC Symbol	BRCA1 DNA repair associated [Source:HGNC Symbol;Acc:HGNC:1100]	positive regulation of histone H3-K9 acetylation
BRCA1	HGNC Symbol	BRCA1 DNA repair associated [Source:HGNC Symbol;Acc:HGNC:1100]	positive regulation of histone H4-K16 acetylation
BRCA1	HGNC Symbol	BRCA1 DNA repair associated [Source:HGNC Symbol;Acc:HGNC:1100]	lateral element
BRCA1	HGNC Symbol	BRCA1 DNA repair associated [Source:HGNC Symbol;Acc:HGNC:1100]	gamma-tubulin ring complex
BRCA1	HGNC Symbol	BRCA1 DNA repair associated [Source:HGNC Symbol;Acc:HGNC:1100]	BRCA1-A complex
BRCA1	HGNC Symbol	BRCA1 DNA repair associated [Source:HGNC Symbol;Acc:HGNC:1100]	damaged DNA binding
BRCA1	HGNC Symbol	BRCA1 DNA repair associated [Source:HGNC Symbol;Acc:HGNC:1100]	regulation of gene expression by genetic imprinting
BRCA1	HGNC Symbol	BRCA1 DNA repair associated [Source:HGNC Symbol;Acc:HGNC:1100]	centrosome cycle
BRCA1	HGNC Symbol	BRCA1 DNA repair associated [Source:HGNC Symbol;Acc:HGNC:1100]	regulation of DNA methylation
BRCA1	HGNC Symbol	BRCA1 DNA repair associated [Source:HGNC Symbol;Acc:HGNC:1100]	mitotic G2/M transition checkpoint
BRCA1	HGNC Symbol	BRCA1 DNA repair associated [Source:HGNC Symbol;Acc:HGNC:1100]	negative regulation of histone H3-K4 methylation
BRCA1	HGNC Symbol	BRCA1 DNA repair associated [Source:HGNC Symbol;Acc:HGNC:1100]	positive regulation of histone H3-K9 methylation
BRCA1	HGNC Symbol	BRCA1 DNA repair associated [Source:HGNC Symbol;Acc:HGNC:1100]	condensed chromosome
BRCA1	HGNC Symbol	BRCA1 DNA repair associated [Source:HGNC Symbol;Acc:HGNC:1100]	condensed nuclear chromosome
BRCA1	HGNC Symbol	BRCA1 DNA repair associated [Source:HGNC Symbol;Acc:HGNC:1100]	membrane
BRCA1	HGNC Symbol	BRCA1 DNA repair associated [Source:HGNC Symbol;Acc:HGNC:1100]	integral component of membrane
BRCA1	HGNC Symbol	BRCA1 DNA repair associated [Source:HGNC Symbol;Acc:HGNC:1100]
BRCA2	HGNC Symbol	BRCA2 DNA repair associated [Source:HGNC Symbol;Acc:HGNC:1101]
BRCA2	HGNC Symbol	BRCA2 DNA repair associated [Source:HGNC Symbol;Acc:HGNC:1101]	DNA repair
BRCA2	HGNC Symbol	BRCA2 DNA repair associated [Source:HGNC Symbol;Acc:HGNC:1101]	double-strand break repair via homologous recombination
BRCA2	HGNC Symbol	BRCA2 DNA repair associated [Source:HGNC Symbol;Acc:HGNC:1101]	nucleus
BRCA2	HGNC Symbol	BRCA2 DNA repair associated [Source:HGNC Symbol;Acc:HGNC:1101]	cytoplasm
BRCA2	HGNC Symbol	BRCA2 DNA repair associated [Source:HGNC Symbol;Acc:HGNC:1101]	cell cycle
BRCA2	HGNC Symbol	BRCA2 DNA repair associated [Source:HGNC Symbol;Acc:HGNC:1101]	nucleoplasm
BRCA2	HGNC Symbol	BRCA2 DNA repair associated [Source:HGNC Symbol;Acc:HGNC:1101]	cytosol
BRCA2	HGNC Symbol	BRCA2 DNA repair associated [Source:HGNC Symbol;Acc:HGNC:1101]	cytoskeleton
BRCA2	HGNC Symbol	BRCA2 DNA repair associated [Source:HGNC Symbol;Acc:HGNC:1101]	DNA binding
BRCA2	HGNC Symbol	BRCA2 DNA repair associated [Source:HGNC Symbol;Acc:HGNC:1101]	cellular response to DNA damage stimulus
BRCA2	HGNC Symbol	BRCA2 DNA repair associated [Source:HGNC Symbol;Acc:HGNC:1101]	protein binding
BRCA2	HGNC Symbol	BRCA2 DNA repair associated [Source:HGNC Symbol;Acc:HGNC:1101]	DNA recombination
BRCA2	HGNC Symbol	BRCA2 DNA repair associated [Source:HGNC Symbol;Acc:HGNC:1101]	double-strand break repair
BRCA2	HGNC Symbol	BRCA2 DNA repair associated [Source:HGNC Symbol;Acc:HGNC:1101]	microtubule organizing center
BRCA2	HGNC Symbol	BRCA2 DNA repair associated [Source:HGNC Symbol;Acc:HGNC:1101]	nucleotide-excision repair
BRCA2	HGNC Symbol	BRCA2 DNA repair associated [Source:HGNC Symbol;Acc:HGNC:1101]	positive regulation of transcription, DNA-templated
BRCA2	HGNC Symbol	BRCA2 DNA repair associated [Source:HGNC Symbol;Acc:HGNC:1101]	centrosome
BRCA2	HGNC Symbol	BRCA2 DNA repair associated [Source:HGNC Symbol;Acc:HGNC:1101]	identical protein binding
BRCA2	HGNC Symbol	BRCA2 DNA repair associated [Source:HGNC Symbol;Acc:HGNC:1101]	regulation of transcription, DNA-templated
BRCA2	HGNC Symbol	BRCA2 DNA repair associated [Source:HGNC Symbol;Acc:HGNC:1101]	protein-containing complex
BRCA2	HGNC Symbol	BRCA2 DNA repair associated [Source:HGNC Symbol;Acc:HGNC:1101]	nuclear chromosome, telomeric region
BRCA2	HGNC Symbol	BRCA2 DNA repair associated [Source:HGNC Symbol;Acc:HGNC:1101]	single-stranded DNA binding
BRCA2	HGNC Symbol	BRCA2 DNA repair associated [Source:HGNC Symbol;Acc:HGNC:1101]	histone H4 acetylation
BRCA2	HGNC Symbol	BRCA2 DNA repair associated [Source:HGNC Symbol;Acc:HGNC:1101]	protease binding
BRCA2	HGNC Symbol	BRCA2 DNA repair associated [Source:HGNC Symbol;Acc:HGNC:1101]	gamma-tubulin binding
BRCA2	HGNC Symbol	BRCA2 DNA repair associated [Source:HGNC Symbol;Acc:HGNC:1101]	secretory granule
BRCA2	HGNC Symbol	BRCA2 DNA repair associated [Source:HGNC Symbol;Acc:HGNC:1101]	establishment of protein localization to telomere
BRCA2	HGNC Symbol	BRCA2 DNA repair associated [Source:HGNC Symbol;Acc:HGNC:1101]	H4 histone acetyltransferase activity
BRCA2	HGNC Symbol	BRCA2 DNA repair associated [Source:HGNC Symbol;Acc:HGNC:1101]	histone H3 acetylation
BRCA2	HGNC Symbol	BRCA2 DNA repair associated [Source:HGNC Symbol;Acc:HGNC:1101]	centrosome duplication
BRCA2	HGNC Symbol	BRCA2 DNA repair associated [Source:HGNC Symbol;Acc:HGNC:1101]	H3 histone acetyltransferase activity
BRCA2	HGNC Symbol	BRCA2 DNA repair associated [Source:HGNC Symbol;Acc:HGNC:1101]	protein C-terminus binding
BRCA2	HGNC Symbol	BRCA2 DNA repair associated [Source:HGNC Symbol;Acc:HGNC:1101]	negative regulation of mammary gland epithelial cell proliferation
BRCA2	HGNC Symbol	BRCA2 DNA repair associated [Source:HGNC Symbol;Acc:HGNC:1101]	lateral element
BRCA2	HGNC Symbol	BRCA2 DNA repair associated [Source:HGNC Symbol;Acc:HGNC:1101]	mitotic recombination-dependent replication fork processing
BRCA2	HGNC Symbol	BRCA2 DNA repair associated [Source:HGNC Symbol;Acc:HGNC:1101]	BRCA2-MAGE-D1 complex
BRCA2	HGNC Symbol	BRCA2 DNA repair associated [Source:HGNC Symbol;Acc:HGNC:1101]	telomere maintenance via recombination
BRCA2	HGNC Symbol	BRCA2 DNA repair associated [Source:HGNC Symbol;Acc:HGNC:1101]	oocyte maturation
BRCA2	HGNC Symbol	BRCA2 DNA repair associated [Source:HGNC Symbol;Acc:HGNC:1101]	inner cell mass cell proliferation
BRCA2	HGNC Symbol	BRCA2 DNA repair associated [Source:HGNC Symbol;Acc:HGNC:1101]	DNA damage response, signal transduction by p53 class mediator resulting in transcription of p21 class mediator
BRCA2	HGNC Symbol	BRCA2 DNA repair associated [Source:HGNC Symbol;Acc:HGNC:1101]	male meiosis I
BRCA2	HGNC Symbol	BRCA2 DNA repair associated [Source:HGNC Symbol;Acc:HGNC:1101]	spermatogenesis
BRCA2	HGNC Symbol	BRCA2 DNA repair associated [Source:HGNC Symbol;Acc:HGNC:1101]	brain development
BRCA2	HGNC Symbol	BRCA2 DNA repair associated [Source:HGNC Symbol;Acc:HGNC:1101]	cell aging
BRCA2	HGNC Symbol	BRCA2 DNA repair associated [Source:HGNC Symbol;Acc:HGNC:1101]	cell population proliferation
BRCA2	HGNC Symbol	BRCA2 DNA repair associated [Source:HGNC Symbol;Acc:HGNC:1101]	female gonad development
BRCA2	HGNC Symbol	BRCA2 DNA repair associated [Source:HGNC Symbol;Acc:HGNC:1101]	intrinsic apoptotic signaling pathway in response to DNA damage
BRCA2	HGNC Symbol	BRCA2 DNA repair associated [Source:HGNC Symbol;Acc:HGNC:1101]	response to X-ray
BRCA2	HGNC Symbol	BRCA2 DNA repair associated [Source:HGNC Symbol;Acc:HGNC:1101]	response to UV-C
BRCA2	HGNC Symbol	BRCA2 DNA repair associated [Source:HGNC Symbol;Acc:HGNC:1101]	response to gamma radiation
BRCA2	HGNC Symbol	BRCA2 DNA repair associated [Source:HGNC Symbol;Acc:HGNC:1101]	hemopoiesis
BRCA2	HGNC Symbol	BRCA2 DNA repair associated [Source:HGNC Symbol;Acc:HGNC:1101]	regulation of cytokinesis
BRCA2	HGNC Symbol	BRCA2 DNA repair associated [Source:HGNC Symbol;Acc:HGNC:1101]	intrinsic apoptotic signaling pathway in response to DNA damage by p53 class mediator
BRCA2	HGNC Symbol	BRCA2 DNA repair associated [Source:HGNC Symbol;Acc:HGNC:1101]	chordate embryonic development
BRCA2	HGNC Symbol	BRCA2 DNA repair associated [Source:HGNC Symbol;Acc:HGNC:1101]	positive regulation of mitotic cell cycle
BRCA2	HGNC Symbol	BRCA2 DNA repair associated [Source:HGNC Symbol;Acc:HGNC:1101]	replication fork protection
BRCA2	HGNC Symbol	BRCA2 DNA repair associated [Source:HGNC Symbol;Acc:HGNC:1101]	chromosome organization
BRCA2	HGNC Symbol	BRCA2 DNA repair associated [Source:HGNC Symbol;Acc:HGNC:1101]	chromosome
BRIP1	HGNC Symbol	BRCA1 interacting protein C-terminal helicase 1 [Source:HGNC Symbol;Acc:HGNC:20473]	DNA binding
BRIP1	HGNC Symbol	BRCA1 interacting protein C-terminal helicase 1 [Source:HGNC Symbol;Acc:HGNC:20473]	ATP binding
BRIP1	HGNC Symbol	BRCA1 interacting protein C-terminal helicase 1 [Source:HGNC Symbol;Acc:HGNC:20473]	hydrolase activity, acting on acid anhydrides, in phosphorus-containing anhydrides
BRIP1	HGNC Symbol	BRCA1 interacting protein C-terminal helicase 1 [Source:HGNC Symbol;Acc:HGNC:20473]	DNA helicase activity
BRIP1	HGNC Symbol	BRCA1 interacting protein C-terminal helicase 1 [Source:HGNC Symbol;Acc:HGNC:20473]	nucleic acid binding
BRIP1	HGNC Symbol	BRCA1 interacting protein C-terminal helicase 1 [Source:HGNC Symbol;Acc:HGNC:20473]	nucleobase-containing compound metabolic process
BRIP1	HGNC Symbol	BRCA1 interacting protein C-terminal helicase 1 [Source:HGNC Symbol;Acc:HGNC:20473]	helicase activity
BRIP1	HGNC Symbol	BRCA1 interacting protein C-terminal helicase 1 [Source:HGNC Symbol;Acc:HGNC:20473]	nucleus
BRIP1	HGNC Symbol	BRCA1 interacting protein C-terminal helicase 1 [Source:HGNC Symbol;Acc:HGNC:20473]	cytoplasm
BRIP1	HGNC Symbol	BRCA1 interacting protein C-terminal helicase 1 [Source:HGNC Symbol;Acc:HGNC:20473]	metal ion binding
BRIP1	HGNC Symbol	BRCA1 interacting protein C-terminal helicase 1 [Source:HGNC Symbol;Acc:HGNC:20473]	nucleotide binding
BRIP1	HGNC Symbol	BRCA1 interacting protein C-terminal helicase 1 [Source:HGNC Symbol;Acc:HGNC:20473]	nucleoplasm
BRIP1	HGNC Symbol	BRCA1 interacting protein C-terminal helicase 1 [Source:HGNC Symbol;Acc:HGNC:20473]	hydrolase activity
BRIP1	HGNC Symbol	BRCA1 interacting protein C-terminal helicase 1 [Source:HGNC Symbol;Acc:HGNC:20473]	nuclear membrane
BRIP1	HGNC Symbol	BRCA1 interacting protein C-terminal helicase 1 [Source:HGNC Symbol;Acc:HGNC:20473]	DNA repair
BRIP1	HGNC Symbol	BRCA1 interacting protein C-terminal helicase 1 [Source:HGNC Symbol;Acc:HGNC:20473]	cellular response to DNA damage stimulus
BRIP1	HGNC Symbol	BRCA1 interacting protein C-terminal helicase 1 [Source:HGNC Symbol;Acc:HGNC:20473]	protein binding
BRIP1	HGNC Symbol	BRCA1 interacting protein C-terminal helicase 1 [Source:HGNC Symbol;Acc:HGNC:20473]	RNA helicase activity
BRIP1	HGNC Symbol	BRCA1 interacting protein C-terminal helicase 1 [Source:HGNC Symbol;Acc:HGNC:20473]	DNA duplex unwinding
BRIP1	HGNC Symbol	BRCA1 interacting protein C-terminal helicase 1 [Source:HGNC Symbol;Acc:HGNC:20473]	double-strand break repair
BRIP1	HGNC Symbol	BRCA1 interacting protein C-terminal helicase 1 [Source:HGNC Symbol;Acc:HGNC:20473]	iron-sulfur cluster binding
BRIP1	HGNC Symbol	BRCA1 interacting protein C-terminal helicase 1 [Source:HGNC Symbol;Acc:HGNC:20473]	4 iron, 4 sulfur cluster binding
BRIP1	HGNC Symbol	BRCA1 interacting protein C-terminal helicase 1 [Source:HGNC Symbol;Acc:HGNC:20473]	regulation of signal transduction by p53 class mediator
BRIP1	HGNC Symbol	BRCA1 interacting protein C-terminal helicase 1 [Source:HGNC Symbol;Acc:HGNC:20473]	DNA replication
BRIP1	HGNC Symbol	BRCA1 interacting protein C-terminal helicase 1 [Source:HGNC Symbol;Acc:HGNC:20473]	DNA damage checkpoint
BRIP1	HGNC Symbol	BRCA1 interacting protein C-terminal helicase 1 [Source:HGNC Symbol;Acc:HGNC:20473]	regulation of transcription by RNA polymerase II
BRIP1	HGNC Symbol	BRCA1 interacting protein C-terminal helicase 1 [Source:HGNC Symbol;Acc:HGNC:20473]	nucleotide-excision repair
BRIP1	HGNC Symbol	BRCA1 interacting protein C-terminal helicase 1 [Source:HGNC Symbol;Acc:HGNC:20473]	chromatin binding
BRIP1	HGNC Symbol	BRCA1 interacting protein C-terminal helicase 1 [Source:HGNC Symbol;Acc:HGNC:20473]	synapsis
BRIP1	HGNC Symbol	BRCA1 interacting protein C-terminal helicase 1 [Source:HGNC Symbol;Acc:HGNC:20473]	spermatogenesis
BRIP1	HGNC Symbol	BRCA1 interacting protein C-terminal helicase 1 [Source:HGNC Symbol;Acc:HGNC:20473]	spermatogonial cell division
BRIP1	HGNC Symbol	BRCA1 interacting protein C-terminal helicase 1 [Source:HGNC Symbol;Acc:HGNC:20473]	spermatid development
BRIP1	HGNC Symbol	BRCA1 interacting protein C-terminal helicase 1 [Source:HGNC Symbol;Acc:HGNC:20473]	negative regulation of cell population proliferation
BRIP1	HGNC Symbol	BRCA1 interacting protein C-terminal helicase 1 [Source:HGNC Symbol;Acc:HGNC:20473]	male gonad development
BRIP1	HGNC Symbol	BRCA1 interacting protein C-terminal helicase 1 [Source:HGNC Symbol;Acc:HGNC:20473]	response to toxic substance
BRIP1	HGNC Symbol	BRCA1 interacting protein C-terminal helicase 1 [Source:HGNC Symbol;Acc:HGNC:20473]	negative regulation of gene expression
BRIP1	HGNC Symbol	BRCA1 interacting protein C-terminal helicase 1 [Source:HGNC Symbol;Acc:HGNC:20473]	meiotic DNA double-strand break processing involved in reciprocal meiotic recombination
BRIP1	HGNC Symbol	BRCA1 interacting protein C-terminal helicase 1 [Source:HGNC Symbol;Acc:HGNC:20473]	chiasma assembly
BRIP1	HGNC Symbol	BRCA1 interacting protein C-terminal helicase 1 [Source:HGNC Symbol;Acc:HGNC:20473]	cellular response to vitamin
BRIP1	HGNC Symbol	BRCA1 interacting protein C-terminal helicase 1 [Source:HGNC Symbol;Acc:HGNC:20473]	cellular response to hypoxia
BRIP1	HGNC Symbol	BRCA1 interacting protein C-terminal helicase 1 [Source:HGNC Symbol;Acc:HGNC:20473]	seminiferous tubule development
BRIP1	HGNC Symbol	BRCA1 interacting protein C-terminal helicase 1 [Source:HGNC Symbol;Acc:HGNC:20473]	cellular response to angiotensin
BRIP1	HGNC Symbol	BRCA1 interacting protein C-terminal helicase 1 [Source:HGNC Symbol;Acc:HGNC:20473]	double-strand break repair involved in meiotic recombination
BRIP1	HGNC Symbol	BRCA1 interacting protein C-terminal helicase 1 [Source:HGNC Symbol;Acc:HGNC:20473]
CACNA2D3	HGNC Symbol	calcium voltage-gated channel auxiliary subunit alpha2delta 3 [Source:HGNC Symbol;Acc:HGNC:15460]	membrane
CACNA2D3	HGNC Symbol	calcium voltage-gated channel auxiliary subunit alpha2delta 3 [Source:HGNC Symbol;Acc:HGNC:15460]	integral component of membrane
CACNA2D3	HGNC Symbol	calcium voltage-gated channel auxiliary subunit alpha2delta 3 [Source:HGNC Symbol;Acc:HGNC:15460]	metal ion binding
CACNA2D3	HGNC Symbol	calcium voltage-gated channel auxiliary subunit alpha2delta 3 [Source:HGNC Symbol;Acc:HGNC:15460]	ion transport
CACNA2D3	HGNC Symbol	calcium voltage-gated channel auxiliary subunit alpha2delta 3 [Source:HGNC Symbol;Acc:HGNC:15460]	voltage-gated ion channel activity
CACNA2D3	HGNC Symbol	calcium voltage-gated channel auxiliary subunit alpha2delta 3 [Source:HGNC Symbol;Acc:HGNC:15460]	regulation of ion transmembrane transport
CACNA2D3	HGNC Symbol	calcium voltage-gated channel auxiliary subunit alpha2delta 3 [Source:HGNC Symbol;Acc:HGNC:15460]	calcium ion transport
CACNA2D3	HGNC Symbol	calcium voltage-gated channel auxiliary subunit alpha2delta 3 [Source:HGNC Symbol;Acc:HGNC:15460]	calcium channel activity
CACNA2D3	HGNC Symbol	calcium voltage-gated channel auxiliary subunit alpha2delta 3 [Source:HGNC Symbol;Acc:HGNC:15460]	calcium ion transmembrane transport
CACNA2D3	HGNC Symbol	calcium voltage-gated channel auxiliary subunit alpha2delta 3 [Source:HGNC Symbol;Acc:HGNC:15460]	plasma membrane
CACNA2D3	HGNC Symbol	calcium voltage-gated channel auxiliary subunit alpha2delta 3 [Source:HGNC Symbol;Acc:HGNC:15460]	cardiac conduction
CACNA2D3	HGNC Symbol	calcium voltage-gated channel auxiliary subunit alpha2delta 3 [Source:HGNC Symbol;Acc:HGNC:15460]	voltage-gated calcium channel complex
CACNA2D3	HGNC Symbol	calcium voltage-gated channel auxiliary subunit alpha2delta 3 [Source:HGNC Symbol;Acc:HGNC:15460]	voltage-gated calcium channel activity
CACNA2D3	HGNC Symbol	calcium voltage-gated channel auxiliary subunit alpha2delta 3 [Source:HGNC Symbol;Acc:HGNC:15460]
CASP8	HGNC Symbol	caspase 8 [Source:HGNC Symbol;Acc:HGNC:1509]	protein binding
CASP8	HGNC Symbol	caspase 8 [Source:HGNC Symbol;Acc:HGNC:1509]	regulation of apoptotic process
CASP8	HGNC Symbol	caspase 8 [Source:HGNC Symbol;Acc:HGNC:1509]	proteolysis
CASP8	HGNC Symbol	caspase 8 [Source:HGNC Symbol;Acc:HGNC:1509]	cysteine-type peptidase activity
CASP8	HGNC Symbol	caspase 8 [Source:HGNC Symbol;Acc:HGNC:1509]	cysteine-type endopeptidase activity
CASP8	HGNC Symbol	caspase 8 [Source:HGNC Symbol;Acc:HGNC:1509]	nucleoplasm
CASP8	HGNC Symbol	caspase 8 [Source:HGNC Symbol;Acc:HGNC:1509]	cytosol
CASP8	HGNC Symbol	caspase 8 [Source:HGNC Symbol;Acc:HGNC:1509]	peptidase activity
CASP8	HGNC Symbol	caspase 8 [Source:HGNC Symbol;Acc:HGNC:1509]	hydrolase activity
CASP8	HGNC Symbol	caspase 8 [Source:HGNC Symbol;Acc:HGNC:1509]	positive regulation of interleukin-1 beta production
CASP8	HGNC Symbol	caspase 8 [Source:HGNC Symbol;Acc:HGNC:1509]	nucleus
CASP8	HGNC Symbol	caspase 8 [Source:HGNC Symbol;Acc:HGNC:1509]	cytoplasm
CASP8	HGNC Symbol	caspase 8 [Source:HGNC Symbol;Acc:HGNC:1509]	apoptotic process
CASP8	HGNC Symbol	caspase 8 [Source:HGNC Symbol;Acc:HGNC:1509]	viral process
CASP8	HGNC Symbol	caspase 8 [Source:HGNC Symbol;Acc:HGNC:1509]	angiogenesis
CASP8	HGNC Symbol	caspase 8 [Source:HGNC Symbol;Acc:HGNC:1509]	identical protein binding
CASP8	HGNC Symbol	caspase 8 [Source:HGNC Symbol;Acc:HGNC:1509]	heart development
CASP8	HGNC Symbol	caspase 8 [Source:HGNC Symbol;Acc:HGNC:1509]	positive regulation of apoptotic process
CASP8	HGNC Symbol	caspase 8 [Source:HGNC Symbol;Acc:HGNC:1509]	ubiquitin protein ligase binding
CASP8	HGNC Symbol	caspase 8 [Source:HGNC Symbol;Acc:HGNC:1509]	positive regulation of I-kappaB kinase/NF-kappaB signaling
CASP8	HGNC Symbol	caspase 8 [Source:HGNC Symbol;Acc:HGNC:1509]	cellular response to mechanical stimulus
CASP8	HGNC Symbol	caspase 8 [Source:HGNC Symbol;Acc:HGNC:1509]	B cell activation
CASP8	HGNC Symbol	caspase 8 [Source:HGNC Symbol;Acc:HGNC:1509]	negative regulation of necroptotic process
CASP8	HGNC Symbol	caspase 8 [Source:HGNC Symbol;Acc:HGNC:1509]	TRIF-dependent toll-like receptor signaling pathway
CASP8	HGNC Symbol	caspase 8 [Source:HGNC Symbol;Acc:HGNC:1509]	apoptotic signaling pathway
CASP8	HGNC Symbol	caspase 8 [Source:HGNC Symbol;Acc:HGNC:1509]	activation of cysteine-type endopeptidase activity involved in apoptotic process
CASP8	HGNC Symbol	caspase 8 [Source:HGNC Symbol;Acc:HGNC:1509]	cell surface receptor signaling pathway
CASP8	HGNC Symbol	caspase 8 [Source:HGNC Symbol;Acc:HGNC:1509]	TRAIL-activated apoptotic signaling pathway
CASP8	HGNC Symbol	caspase 8 [Source:HGNC Symbol;Acc:HGNC:1509]	extrinsic apoptotic signaling pathway
CASP8	HGNC Symbol	caspase 8 [Source:HGNC Symbol;Acc:HGNC:1509]	regulation of extrinsic apoptotic signaling pathway via death domain receptors
CASP8	HGNC Symbol	caspase 8 [Source:HGNC Symbol;Acc:HGNC:1509]	negative regulation of extrinsic apoptotic signaling pathway via death domain receptors
CASP8	HGNC Symbol	caspase 8 [Source:HGNC Symbol;Acc:HGNC:1509]	cytoskeleton
CASP8	HGNC Symbol	caspase 8 [Source:HGNC Symbol;Acc:HGNC:1509]	natural killer cell activation
CASP8	HGNC Symbol	caspase 8 [Source:HGNC Symbol;Acc:HGNC:1509]	T cell activation
CASP8	HGNC Symbol	caspase 8 [Source:HGNC Symbol;Acc:HGNC:1509]	execution phase of apoptosis
CASP8	HGNC Symbol	caspase 8 [Source:HGNC Symbol;Acc:HGNC:1509]	mitochondrial outer membrane
CASP8	HGNC Symbol	caspase 8 [Source:HGNC Symbol;Acc:HGNC:1509]	mitochondrion
CASP8	HGNC Symbol	caspase 8 [Source:HGNC Symbol;Acc:HGNC:1509]	response to tumor necrosis factor
CASP8	HGNC Symbol	caspase 8 [Source:HGNC Symbol;Acc:HGNC:1509]	negative regulation of I-kappaB kinase/NF-kappaB signaling
CASP8	HGNC Symbol	caspase 8 [Source:HGNC Symbol;Acc:HGNC:1509]	pyroptosis
CASP8	HGNC Symbol	caspase 8 [Source:HGNC Symbol;Acc:HGNC:1509]	regulation of tumor necrosis factor-mediated signaling pathway
CASP8	HGNC Symbol	caspase 8 [Source:HGNC Symbol;Acc:HGNC:1509]	positive regulation of protein insertion into mitochondrial membrane involved in apoptotic signaling pathway
CASP8	HGNC Symbol	caspase 8 [Source:HGNC Symbol;Acc:HGNC:1509]	toll-like receptor 3 signaling pathway
CASP8	HGNC Symbol	caspase 8 [Source:HGNC Symbol;Acc:HGNC:1509]	cysteine-type endopeptidase activity involved in apoptotic process
CASP8	HGNC Symbol	caspase 8 [Source:HGNC Symbol;Acc:HGNC:1509]	cysteine-type endopeptidase activity involved in apoptotic signaling pathway
CASP8	HGNC Symbol	caspase 8 [Source:HGNC Symbol;Acc:HGNC:1509]	cysteine-type endopeptidase activity involved in execution phase of apoptosis
CASP8	HGNC Symbol	caspase 8 [Source:HGNC Symbol;Acc:HGNC:1509]	death-inducing signaling complex
CASP8	HGNC Symbol	caspase 8 [Source:HGNC Symbol;Acc:HGNC:1509]	ripoptosome
CASP8	HGNC Symbol	caspase 8 [Source:HGNC Symbol;Acc:HGNC:1509]	nucleotide-binding oligomerization domain containing signaling pathway
CASP8	HGNC Symbol	caspase 8 [Source:HGNC Symbol;Acc:HGNC:1509]	extrinsic apoptotic signaling pathway via death domain receptors
CASP8	HGNC Symbol	caspase 8 [Source:HGNC Symbol;Acc:HGNC:1509]	protein-containing complex
CASP8	HGNC Symbol	caspase 8 [Source:HGNC Symbol;Acc:HGNC:1509]	death-inducing signaling complex assembly
CASP8	HGNC Symbol	caspase 8 [Source:HGNC Symbol;Acc:HGNC:1509]	positive regulation of macrophage differentiation
CASP8	HGNC Symbol	caspase 8 [Source:HGNC Symbol;Acc:HGNC:1509]	macrophage differentiation
CASP8	HGNC Symbol	caspase 8 [Source:HGNC Symbol;Acc:HGNC:1509]	self proteolysis
CASP8	HGNC Symbol	caspase 8 [Source:HGNC Symbol;Acc:HGNC:1509]	proteolysis involved in cellular protein catabolic process
CASP8	HGNC Symbol	caspase 8 [Source:HGNC Symbol;Acc:HGNC:1509]	CD95 death-inducing signaling complex
CASP8	HGNC Symbol	caspase 8 [Source:HGNC Symbol;Acc:HGNC:1509]	positive regulation of proteolysis
CASP8	HGNC Symbol	caspase 8 [Source:HGNC Symbol;Acc:HGNC:1509]	activation of cysteine-type endopeptidase activity
CASP8	HGNC Symbol	caspase 8 [Source:HGNC Symbol;Acc:HGNC:1509]	death effector domain binding
CASP8	HGNC Symbol	caspase 8 [Source:HGNC Symbol;Acc:HGNC:1509]	regulation of necroptotic process
CASP8	HGNC Symbol	caspase 8 [Source:HGNC Symbol;Acc:HGNC:1509]	scaffold protein binding
CASP8	HGNC Symbol	caspase 8 [Source:HGNC Symbol;Acc:HGNC:1509]	suppression by virus of host cysteine-type endopeptidase activity involved in apoptotic process
CASP8	HGNC Symbol	caspase 8 [Source:HGNC Symbol;Acc:HGNC:1509]	syncytiotrophoblast cell differentiation involved in labyrinthine layer development
CASP8	HGNC Symbol	caspase 8 [Source:HGNC Symbol;Acc:HGNC:1509]	activation of cysteine-type endopeptidase activity involved in apoptotic signaling pathway
CASP8	HGNC Symbol	caspase 8 [Source:HGNC Symbol;Acc:HGNC:1509]
CASP8	HGNC Symbol	caspase 8 [Source:HGNC Symbol;Acc:HGNC:1509]	death receptor binding
CASP8	HGNC Symbol	caspase 8 [Source:HGNC Symbol;Acc:HGNC:1509]	tumor necrosis factor receptor binding
CASP8	HGNC Symbol	caspase 8 [Source:HGNC Symbol;Acc:HGNC:1509]	protein-containing complex binding
CASP8	HGNC Symbol	caspase 8 [Source:HGNC Symbol;Acc:HGNC:1509]	response to cold
CASP8	HGNC Symbol	caspase 8 [Source:HGNC Symbol;Acc:HGNC:1509]	response to cobalt ion
CASP8	HGNC Symbol	caspase 8 [Source:HGNC Symbol;Acc:HGNC:1509]	response to estradiol
CASP8	HGNC Symbol	caspase 8 [Source:HGNC Symbol;Acc:HGNC:1509]	response to lipopolysaccharide
CASP8	HGNC Symbol	caspase 8 [Source:HGNC Symbol;Acc:HGNC:1509]	response to ethanol
CASP8	HGNC Symbol	caspase 8 [Source:HGNC Symbol;Acc:HGNC:1509]	response to antibiotic
CASP8	HGNC Symbol	caspase 8 [Source:HGNC Symbol;Acc:HGNC:1509]	cellular response to organic cyclic compound
CASP8	HGNC Symbol	caspase 8 [Source:HGNC Symbol;Acc:HGNC:1509]	positive regulation of neuron death
CASP8	HGNC Symbol	caspase 8 [Source:HGNC Symbol;Acc:HGNC:1509]	neuron projection
CASP8	HGNC Symbol	caspase 8 [Source:HGNC Symbol;Acc:HGNC:1509]	cell body
CASP8	HGNC Symbol	caspase 8 [Source:HGNC Symbol;Acc:HGNC:1509]	membrane raft
CBFB	HGNC Symbol	core-binding factor subunit beta [Source:HGNC Symbol;Acc:HGNC:1539]
CBFB	HGNC Symbol	core-binding factor subunit beta [Source:HGNC Symbol;Acc:HGNC:1539]	nucleus
CBFB	HGNC Symbol	core-binding factor subunit beta [Source:HGNC Symbol;Acc:HGNC:1539]	transcription coactivator activity
CBFB	HGNC Symbol	core-binding factor subunit beta [Source:HGNC Symbol;Acc:HGNC:1539]	positive regulation of nucleic acid-templated transcription
CBFB	HGNC Symbol	core-binding factor subunit beta [Source:HGNC Symbol;Acc:HGNC:1539]	membrane
CBFB	HGNC Symbol	core-binding factor subunit beta [Source:HGNC Symbol;Acc:HGNC:1539]	protein binding
CBFB	HGNC Symbol	core-binding factor subunit beta [Source:HGNC Symbol;Acc:HGNC:1539]	sequence-specific DNA binding
CBFB	HGNC Symbol	core-binding factor subunit beta [Source:HGNC Symbol;Acc:HGNC:1539]	regulation of transcription by RNA polymerase II
CBFB	HGNC Symbol	core-binding factor subunit beta [Source:HGNC Symbol;Acc:HGNC:1539]	negative regulation of transcription by RNA polymerase II
CBFB	HGNC Symbol	core-binding factor subunit beta [Source:HGNC Symbol;Acc:HGNC:1539]	DNA binding
CBFB	HGNC Symbol	core-binding factor subunit beta [Source:HGNC Symbol;Acc:HGNC:1539]	nucleoplasm
CBFB	HGNC Symbol	core-binding factor subunit beta [Source:HGNC Symbol;Acc:HGNC:1539]	transcription coregulator activity
CBFB	HGNC Symbol	core-binding factor subunit beta [Source:HGNC Symbol;Acc:HGNC:1539]	regulation of hematopoietic stem cell differentiation
CBFB	HGNC Symbol	core-binding factor subunit beta [Source:HGNC Symbol;Acc:HGNC:1539]	transcription by RNA polymerase II
CBFB	HGNC Symbol	core-binding factor subunit beta [Source:HGNC Symbol;Acc:HGNC:1539]	transcription initiation from RNA polymerase II promoter
CBFB	HGNC Symbol	core-binding factor subunit beta [Source:HGNC Symbol;Acc:HGNC:1539]	regulation of bicellular tight junction assembly
CBFB	HGNC Symbol	core-binding factor subunit beta [Source:HGNC Symbol;Acc:HGNC:1539]	regulation of megakaryocyte differentiation
CBFB	HGNC Symbol	core-binding factor subunit beta [Source:HGNC Symbol;Acc:HGNC:1539]	regulation of Wnt signaling pathway
CBFB	HGNC Symbol	core-binding factor subunit beta [Source:HGNC Symbol;Acc:HGNC:1539]	regulation of intracellular estrogen receptor signaling pathway
CBFB	HGNC Symbol	core-binding factor subunit beta [Source:HGNC Symbol;Acc:HGNC:1539]	regulation of keratinocyte differentiation
CBFB	HGNC Symbol	core-binding factor subunit beta [Source:HGNC Symbol;Acc:HGNC:1539]	regulation of regulatory T cell differentiation
CBFB	HGNC Symbol	core-binding factor subunit beta [Source:HGNC Symbol;Acc:HGNC:1539]	regulation of myeloid cell differentiation
CBFB	HGNC Symbol	core-binding factor subunit beta [Source:HGNC Symbol;Acc:HGNC:1539]	regulation of cytokine-mediated signaling pathway
CBFB	HGNC Symbol	core-binding factor subunit beta [Source:HGNC Symbol;Acc:HGNC:1539]	negative regulation of CD4-positive, alpha-beta T cell differentiation
CBFB	HGNC Symbol	core-binding factor subunit beta [Source:HGNC Symbol;Acc:HGNC:1539]	regulation of B cell receptor signaling pathway
CBFB	HGNC Symbol	core-binding factor subunit beta [Source:HGNC Symbol;Acc:HGNC:1539]	positive regulation of CD8-positive, alpha-beta T cell differentiation
CBFB	HGNC Symbol	core-binding factor subunit beta [Source:HGNC Symbol;Acc:HGNC:1539]	core-binding factor complex
CBFB	HGNC Symbol	core-binding factor subunit beta [Source:HGNC Symbol;Acc:HGNC:1539]	protein polyubiquitination
CBFB	HGNC Symbol	core-binding factor subunit beta [Source:HGNC Symbol;Acc:HGNC:1539]	ossification
CBFB	HGNC Symbol	core-binding factor subunit beta [Source:HGNC Symbol;Acc:HGNC:1539]	osteoblast differentiation
CBFB	HGNC Symbol	core-binding factor subunit beta [Source:HGNC Symbol;Acc:HGNC:1539]	lymphocyte differentiation
CBFB	HGNC Symbol	core-binding factor subunit beta [Source:HGNC Symbol;Acc:HGNC:1539]	myeloid cell differentiation
CBFB	HGNC Symbol	core-binding factor subunit beta [Source:HGNC Symbol;Acc:HGNC:1539]	positive regulation of transcription by RNA polymerase II
CBFB	HGNC Symbol	core-binding factor subunit beta [Source:HGNC Symbol;Acc:HGNC:1539]	cell maturation
CBFB	HGNC Symbol	core-binding factor subunit beta [Source:HGNC Symbol;Acc:HGNC:1539]	definitive hemopoiesis
CCND3	HGNC Symbol	cyclin D3 [Source:HGNC Symbol;Acc:HGNC:1585]	host cell nucleus
CCND3	HGNC Symbol	cyclin D3 [Source:HGNC Symbol;Acc:HGNC:1585]	positive regulation of protein phosphorylation
CCND3	HGNC Symbol	cyclin D3 [Source:HGNC Symbol;Acc:HGNC:1585]	nucleus
CCND3	HGNC Symbol	cyclin D3 [Source:HGNC Symbol;Acc:HGNC:1585]	cytoplasm
CCND3	HGNC Symbol	cyclin D3 [Source:HGNC Symbol;Acc:HGNC:1585]	membrane
CCND3	HGNC Symbol	cyclin D3 [Source:HGNC Symbol;Acc:HGNC:1585]	cell cycle
CCND3	HGNC Symbol	cyclin D3 [Source:HGNC Symbol;Acc:HGNC:1585]	nucleoplasm
CCND3	HGNC Symbol	cyclin D3 [Source:HGNC Symbol;Acc:HGNC:1585]	cytosol
CCND3	HGNC Symbol	cyclin D3 [Source:HGNC Symbol;Acc:HGNC:1585]	cell division
CCND3	HGNC Symbol	cyclin D3 [Source:HGNC Symbol;Acc:HGNC:1585]	protein binding
CCND3	HGNC Symbol	cyclin D3 [Source:HGNC Symbol;Acc:HGNC:1585]	nuclear body
CCND3	HGNC Symbol	cyclin D3 [Source:HGNC Symbol;Acc:HGNC:1585]	protein kinase binding
CCND3	HGNC Symbol	cyclin D3 [Source:HGNC Symbol;Acc:HGNC:1585]	cyclin-dependent protein serine/threonine kinase regulator activity
CCND3	HGNC Symbol	cyclin D3 [Source:HGNC Symbol;Acc:HGNC:1585]	positive regulation of G1/S transition of mitotic cell cycle
CCND3	HGNC Symbol	cyclin D3 [Source:HGNC Symbol;Acc:HGNC:1585]	regulation of cyclin-dependent protein serine/threonine kinase activity
CCND3	HGNC Symbol	cyclin D3 [Source:HGNC Symbol;Acc:HGNC:1585]	mitotic cell cycle phase transition
CCND3	HGNC Symbol	cyclin D3 [Source:HGNC Symbol;Acc:HGNC:1585]	cyclin-dependent protein kinase holoenzyme complex
CCND3	HGNC Symbol	cyclin D3 [Source:HGNC Symbol;Acc:HGNC:1585]	positive regulation of cyclin-dependent protein serine/threonine kinase activity
CCND3	HGNC Symbol	cyclin D3 [Source:HGNC Symbol;Acc:HGNC:1585]	cyclin-dependent protein serine/threonine kinase activity
CCND3	HGNC Symbol	cyclin D3 [Source:HGNC Symbol;Acc:HGNC:1585]	negative regulation of transcription by RNA polymerase II
CCND3	HGNC Symbol	cyclin D3 [Source:HGNC Symbol;Acc:HGNC:1585]	signal transduction
CCND3	HGNC Symbol	cyclin D3 [Source:HGNC Symbol;Acc:HGNC:1585]	T cell proliferation
CCND3	HGNC Symbol	cyclin D3 [Source:HGNC Symbol;Acc:HGNC:1585]	regulation of cell population proliferation
CCND3	HGNC Symbol	cyclin D3 [Source:HGNC Symbol;Acc:HGNC:1585]	regulation of insulin receptor signaling pathway
CCND3	HGNC Symbol	cyclin D3 [Source:HGNC Symbol;Acc:HGNC:1585]	regulation of cell cycle
CCND3	HGNC Symbol	cyclin D3 [Source:HGNC Symbol;Acc:HGNC:1585]
CDH1	HGNC Symbol	cadherin 1 [Source:HGNC Symbol;Acc:HGNC:1748]	plasma membrane
CDH1	HGNC Symbol	cadherin 1 [Source:HGNC Symbol;Acc:HGNC:1748]	membrane
CDH1	HGNC Symbol	cadherin 1 [Source:HGNC Symbol;Acc:HGNC:1748]	calcium ion binding
CDH1	HGNC Symbol	cadherin 1 [Source:HGNC Symbol;Acc:HGNC:1748]	homophilic cell adhesion via plasma membrane adhesion molecules
CDH1	HGNC Symbol	cadherin 1 [Source:HGNC Symbol;Acc:HGNC:1748]	cell adhesion
CDH1	HGNC Symbol	cadherin 1 [Source:HGNC Symbol;Acc:HGNC:1748]	cell-cell adhesion
CDH1	HGNC Symbol	cadherin 1 [Source:HGNC Symbol;Acc:HGNC:1748]	negative regulation of cell migration
CDH1	HGNC Symbol	cadherin 1 [Source:HGNC Symbol;Acc:HGNC:1748]	perinuclear region of cytoplasm
CDH1	HGNC Symbol	cadherin 1 [Source:HGNC Symbol;Acc:HGNC:1748]	positive regulation of transcription, DNA-templated
CDH1	HGNC Symbol	cadherin 1 [Source:HGNC Symbol;Acc:HGNC:1748]	integral component of membrane
CDH1	HGNC Symbol	cadherin 1 [Source:HGNC Symbol;Acc:HGNC:1748]	metal ion binding
CDH1	HGNC Symbol	cadherin 1 [Source:HGNC Symbol;Acc:HGNC:1748]	Golgi apparatus
CDH1	HGNC Symbol	cadherin 1 [Source:HGNC Symbol;Acc:HGNC:1748]	endosome
CDH1	HGNC Symbol	cadherin 1 [Source:HGNC Symbol;Acc:HGNC:1748]	adherens junction
CDH1	HGNC Symbol	cadherin 1 [Source:HGNC Symbol;Acc:HGNC:1748]	cell junction
CDH1	HGNC Symbol	cadherin 1 [Source:HGNC Symbol;Acc:HGNC:1748]	protein binding
CDH1	HGNC Symbol	cadherin 1 [Source:HGNC Symbol;Acc:HGNC:1748]	lamellipodium
CDH1	HGNC Symbol	cadherin 1 [Source:HGNC Symbol;Acc:HGNC:1748]	cytoplasm
CDH1	HGNC Symbol	cadherin 1 [Source:HGNC Symbol;Acc:HGNC:1748]	extracellular region
CDH1	HGNC Symbol	cadherin 1 [Source:HGNC Symbol;Acc:HGNC:1748]	identical protein binding
CDH1	HGNC Symbol	cadherin 1 [Source:HGNC Symbol;Acc:HGNC:1748]	postsynapse
CDH1	HGNC Symbol	cadherin 1 [Source:HGNC Symbol;Acc:HGNC:1748]	cadherin binding
CDH1	HGNC Symbol	cadherin 1 [Source:HGNC Symbol;Acc:HGNC:1748]	extracellular exosome
CDH1	HGNC Symbol	cadherin 1 [Source:HGNC Symbol;Acc:HGNC:1748]	apical junction complex
CDH1	HGNC Symbol	cadherin 1 [Source:HGNC Symbol;Acc:HGNC:1748]	catenin complex
CDH1	HGNC Symbol	cadherin 1 [Source:HGNC Symbol;Acc:HGNC:1748]	actin cytoskeleton
CDH1	HGNC Symbol	cadherin 1 [Source:HGNC Symbol;Acc:HGNC:1748]	cytoplasmic side of plasma membrane
CDH1	HGNC Symbol	cadherin 1 [Source:HGNC Symbol;Acc:HGNC:1748]	extracellular matrix organization
CDH1	HGNC Symbol	cadherin 1 [Source:HGNC Symbol;Acc:HGNC:1748]	cortical actin cytoskeleton
CDH1	HGNC Symbol	cadherin 1 [Source:HGNC Symbol;Acc:HGNC:1748]	negative regulation of cell-cell adhesion
CDH1	HGNC Symbol	cadherin 1 [Source:HGNC Symbol;Acc:HGNC:1748]	lateral plasma membrane
CDH1	HGNC Symbol	cadherin 1 [Source:HGNC Symbol;Acc:HGNC:1748]	protein localization to plasma membrane
CDH1	HGNC Symbol	cadherin 1 [Source:HGNC Symbol;Acc:HGNC:1748]	regulation of gene expression
CDH1	HGNC Symbol	cadherin 1 [Source:HGNC Symbol;Acc:HGNC:1748]	beta-catenin binding
CDH1	HGNC Symbol	cadherin 1 [Source:HGNC Symbol;Acc:HGNC:1748]	ankyrin binding
CDH1	HGNC Symbol	cadherin 1 [Source:HGNC Symbol;Acc:HGNC:1748]	adherens junction organization
CDH1	HGNC Symbol	cadherin 1 [Source:HGNC Symbol;Acc:HGNC:1748]	entry of bacterium into host cell
CDH1	HGNC Symbol	cadherin 1 [Source:HGNC Symbol;Acc:HGNC:1748]	synapse assembly
CDH1	HGNC Symbol	cadherin 1 [Source:HGNC Symbol;Acc:HGNC:1748]	flotillin complex
CDH1	HGNC Symbol	cadherin 1 [Source:HGNC Symbol;Acc:HGNC:1748]	cell adhesion molecule binding
CDH1	HGNC Symbol	cadherin 1 [Source:HGNC Symbol;Acc:HGNC:1748]	positive regulation of protein import into nucleus
CDH1	HGNC Symbol	cadherin 1 [Source:HGNC Symbol;Acc:HGNC:1748]	GTPase activating protein binding
CDH1	HGNC Symbol	cadherin 1 [Source:HGNC Symbol;Acc:HGNC:1748]	trans-Golgi network
CDH1	HGNC Symbol	cadherin 1 [Source:HGNC Symbol;Acc:HGNC:1748]	gamma-catenin binding
CDH1	HGNC Symbol	cadherin 1 [Source:HGNC Symbol;Acc:HGNC:1748]	cellular response to lithium ion
CDH1	HGNC Symbol	cadherin 1 [Source:HGNC Symbol;Acc:HGNC:1748]	cellular response to indole-3-methanol
CDH1	HGNC Symbol	cadherin 1 [Source:HGNC Symbol;Acc:HGNC:1748]	cell-cell adhesion via plasma-membrane adhesion molecules
CDH1	HGNC Symbol	cadherin 1 [Source:HGNC Symbol;Acc:HGNC:1748]
CDH1	HGNC Symbol	cadherin 1 [Source:HGNC Symbol;Acc:HGNC:1748]	response to toxic substance
CDH1	HGNC Symbol	cadherin 1 [Source:HGNC Symbol;Acc:HGNC:1748]	response to organic substance
CDH1	HGNC Symbol	cadherin 1 [Source:HGNC Symbol;Acc:HGNC:1748]	pituitary gland development
CDH1	HGNC Symbol	cadherin 1 [Source:HGNC Symbol;Acc:HGNC:1748]	neuron projection development
CDH1	HGNC Symbol	cadherin 1 [Source:HGNC Symbol;Acc:HGNC:1748]	response to drug
CDH1	HGNC Symbol	cadherin 1 [Source:HGNC Symbol;Acc:HGNC:1748]	regulation of protein catabolic process at postsynapse, modulating synaptic transmission
CDH1	HGNC Symbol	cadherin 1 [Source:HGNC Symbol;Acc:HGNC:1748]	glutamatergic synapse
CDKN1B	HGNC Symbol	cyclin dependent kinase inhibitor 1B [Source:HGNC Symbol;Acc:HGNC:1785]
CDKN1B	HGNC Symbol	cyclin dependent kinase inhibitor 1B [Source:HGNC Symbol;Acc:HGNC:1785]	nucleus
CDKN1B	HGNC Symbol	cyclin dependent kinase inhibitor 1B [Source:HGNC Symbol;Acc:HGNC:1785]	cytoplasm
CDKN1B	HGNC Symbol	cyclin dependent kinase inhibitor 1B [Source:HGNC Symbol;Acc:HGNC:1785]	cyclin-dependent protein serine/threonine kinase inhibitor activity
CDKN1B	HGNC Symbol	cyclin dependent kinase inhibitor 1B [Source:HGNC Symbol;Acc:HGNC:1785]	cell cycle arrest
CDKN1B	HGNC Symbol	cyclin dependent kinase inhibitor 1B [Source:HGNC Symbol;Acc:HGNC:1785]	regulation of cell population proliferation
CDKN1B	HGNC Symbol	cyclin dependent kinase inhibitor 1B [Source:HGNC Symbol;Acc:HGNC:1785]	negative regulation of vascular associated smooth muscle cell proliferation
CDKN1B	HGNC Symbol	cyclin dependent kinase inhibitor 1B [Source:HGNC Symbol;Acc:HGNC:1785]	negative regulation of cell population proliferation
CDKN1B	HGNC Symbol	cyclin dependent kinase inhibitor 1B [Source:HGNC Symbol;Acc:HGNC:1785]	intracellular membrane-bounded organelle
CDKN1B	HGNC Symbol	cyclin dependent kinase inhibitor 1B [Source:HGNC Symbol;Acc:HGNC:1785]	kinase activity
CDKN1B	HGNC Symbol	cyclin dependent kinase inhibitor 1B [Source:HGNC Symbol;Acc:HGNC:1785]	cell cycle
CDKN1B	HGNC Symbol	cyclin dependent kinase inhibitor 1B [Source:HGNC Symbol;Acc:HGNC:1785]	phosphorylation
CDKN1B	HGNC Symbol	cyclin dependent kinase inhibitor 1B [Source:HGNC Symbol;Acc:HGNC:1785]	nucleoplasm
CDKN1B	HGNC Symbol	cyclin dependent kinase inhibitor 1B [Source:HGNC Symbol;Acc:HGNC:1785]	endosome
CDKN1B	HGNC Symbol	cyclin dependent kinase inhibitor 1B [Source:HGNC Symbol;Acc:HGNC:1785]	protein binding
CDKN1B	HGNC Symbol	cyclin dependent kinase inhibitor 1B [Source:HGNC Symbol;Acc:HGNC:1785]	protein kinase inhibitor activity
CDKN1B	HGNC Symbol	cyclin dependent kinase inhibitor 1B [Source:HGNC Symbol;Acc:HGNC:1785]	DNA damage response, signal transduction by p53 class mediator resulting in cell cycle arrest
CDKN1B	HGNC Symbol	cyclin dependent kinase inhibitor 1B [Source:HGNC Symbol;Acc:HGNC:1785]	cytosol
CDKN1B	HGNC Symbol	cyclin dependent kinase inhibitor 1B [Source:HGNC Symbol;Acc:HGNC:1785]	negative regulation of cyclin-dependent protein serine/threonine kinase activity
CDKN1B	HGNC Symbol	cyclin dependent kinase inhibitor 1B [Source:HGNC Symbol;Acc:HGNC:1785]	negative regulation of cell cycle
CDKN1B	HGNC Symbol	cyclin dependent kinase inhibitor 1B [Source:HGNC Symbol;Acc:HGNC:1785]	negative regulation of transcription, DNA-templated
CDKN1B	HGNC Symbol	cyclin dependent kinase inhibitor 1B [Source:HGNC Symbol;Acc:HGNC:1785]	G1/S transition of mitotic cell cycle
CDKN1B	HGNC Symbol	cyclin dependent kinase inhibitor 1B [Source:HGNC Symbol;Acc:HGNC:1785]	heart development
CDKN1B	HGNC Symbol	cyclin dependent kinase inhibitor 1B [Source:HGNC Symbol;Acc:HGNC:1785]	protein phosphatase binding
CDKN1B	HGNC Symbol	cyclin dependent kinase inhibitor 1B [Source:HGNC Symbol;Acc:HGNC:1785]	negative regulation of mitotic cell cycle
CDKN1B	HGNC Symbol	cyclin dependent kinase inhibitor 1B [Source:HGNC Symbol;Acc:HGNC:1785]	chaperone binding
CDKN1B	HGNC Symbol	cyclin dependent kinase inhibitor 1B [Source:HGNC Symbol;Acc:HGNC:1785]	negative regulation of cell growth
CDKN1B	HGNC Symbol	cyclin dependent kinase inhibitor 1B [Source:HGNC Symbol;Acc:HGNC:1785]	positive regulation of cell death
CDKN1B	HGNC Symbol	cyclin dependent kinase inhibitor 1B [Source:HGNC Symbol;Acc:HGNC:1785]	positive regulation of protein catabolic process
CDKN1B	HGNC Symbol	cyclin dependent kinase inhibitor 1B [Source:HGNC Symbol;Acc:HGNC:1785]	regulation of cyclin-dependent protein serine/threonine kinase activity
CDKN1B	HGNC Symbol	cyclin dependent kinase inhibitor 1B [Source:HGNC Symbol;Acc:HGNC:1785]	cyclin binding
CDKN1B	HGNC Symbol	cyclin dependent kinase inhibitor 1B [Source:HGNC Symbol;Acc:HGNC:1785]	positive regulation of cell cycle
CDKN1B	HGNC Symbol	cyclin dependent kinase inhibitor 1B [Source:HGNC Symbol;Acc:HGNC:1785]	protein kinase binding
CDKN1B	HGNC Symbol	cyclin dependent kinase inhibitor 1B [Source:HGNC Symbol;Acc:HGNC:1785]	protein-containing complex binding
CDKN1B	HGNC Symbol	cyclin dependent kinase inhibitor 1B [Source:HGNC Symbol;Acc:HGNC:1785]	mitotic cell cycle arrest
CDKN1B	HGNC Symbol	cyclin dependent kinase inhibitor 1B [Source:HGNC Symbol;Acc:HGNC:1785]	negative regulation of kinase activity
CDKN1B	HGNC Symbol	cyclin dependent kinase inhibitor 1B [Source:HGNC Symbol;Acc:HGNC:1785]	negative regulation of phosphorylation
CDKN1B	HGNC Symbol	cyclin dependent kinase inhibitor 1B [Source:HGNC Symbol;Acc:HGNC:1785]	negative regulation of cyclin-dependent protein kinase activity
CDKN1B	HGNC Symbol	cyclin dependent kinase inhibitor 1B [Source:HGNC Symbol;Acc:HGNC:1785]	negative regulation of cardiac muscle tissue regeneration
CDKN1B	HGNC Symbol	cyclin dependent kinase inhibitor 1B [Source:HGNC Symbol;Acc:HGNC:1785]	autophagic cell death
CDKN1B	HGNC Symbol	cyclin dependent kinase inhibitor 1B [Source:HGNC Symbol;Acc:HGNC:1785]	cellular response to lithium ion
CDKN1B	HGNC Symbol	cyclin dependent kinase inhibitor 1B [Source:HGNC Symbol;Acc:HGNC:1785]	regulation of cell cycle G1/S phase transition
CDKN1B	HGNC Symbol	cyclin dependent kinase inhibitor 1B [Source:HGNC Symbol;Acc:HGNC:1785]	Cul4A-RING E3 ubiquitin ligase complex
CDKN1B	HGNC Symbol	cyclin dependent kinase inhibitor 1B [Source:HGNC Symbol;Acc:HGNC:1785]	negative regulation of protein kinase activity
CDKN1B	HGNC Symbol	cyclin dependent kinase inhibitor 1B [Source:HGNC Symbol;Acc:HGNC:1785]	Hsp70 protein binding
CDKN1B	HGNC Symbol	cyclin dependent kinase inhibitor 1B [Source:HGNC Symbol;Acc:HGNC:1785]	response to hypoxia
CDKN1B	HGNC Symbol	cyclin dependent kinase inhibitor 1B [Source:HGNC Symbol;Acc:HGNC:1785]	placenta development
CDKN1B	HGNC Symbol	cyclin dependent kinase inhibitor 1B [Source:HGNC Symbol;Acc:HGNC:1785]	potassium ion transport
CDKN1B	HGNC Symbol	cyclin dependent kinase inhibitor 1B [Source:HGNC Symbol;Acc:HGNC:1785]	regulation of exit from mitosis
CDKN1B	HGNC Symbol	cyclin dependent kinase inhibitor 1B [Source:HGNC Symbol;Acc:HGNC:1785]	Notch signaling pathway
CDKN1B	HGNC Symbol	cyclin dependent kinase inhibitor 1B [Source:HGNC Symbol;Acc:HGNC:1785]	sensory perception of sound
CDKN1B	HGNC Symbol	cyclin dependent kinase inhibitor 1B [Source:HGNC Symbol;Acc:HGNC:1785]	cell death
CDKN1B	HGNC Symbol	cyclin dependent kinase inhibitor 1B [Source:HGNC Symbol;Acc:HGNC:1785]	positive regulation of cell population proliferation
CDKN1B	HGNC Symbol	cyclin dependent kinase inhibitor 1B [Source:HGNC Symbol;Acc:HGNC:1785]	response to glucose
CDKN1B	HGNC Symbol	cyclin dependent kinase inhibitor 1B [Source:HGNC Symbol;Acc:HGNC:1785]	response to organic cyclic compound
CDKN1B	HGNC Symbol	cyclin dependent kinase inhibitor 1B [Source:HGNC Symbol;Acc:HGNC:1785]	positive regulation of microtubule polymerization
CDKN1B	HGNC Symbol	cyclin dependent kinase inhibitor 1B [Source:HGNC Symbol;Acc:HGNC:1785]	response to estradiol
CDKN1B	HGNC Symbol	cyclin dependent kinase inhibitor 1B [Source:HGNC Symbol;Acc:HGNC:1785]	response to drug
CDKN1B	HGNC Symbol	cyclin dependent kinase inhibitor 1B [Source:HGNC Symbol;Acc:HGNC:1785]	negative regulation of apoptotic process
CDKN1B	HGNC Symbol	cyclin dependent kinase inhibitor 1B [Source:HGNC Symbol;Acc:HGNC:1785]	response to amino acid
CDKN1B	HGNC Symbol	cyclin dependent kinase inhibitor 1B [Source:HGNC Symbol;Acc:HGNC:1785]	response to peptide hormone
CDKN1B	HGNC Symbol	cyclin dependent kinase inhibitor 1B [Source:HGNC Symbol;Acc:HGNC:1785]	positive regulation of cyclin-dependent protein serine/threonine kinase activity
CDKN1B	HGNC Symbol	cyclin dependent kinase inhibitor 1B [Source:HGNC Symbol;Acc:HGNC:1785]	response to cadmium ion
CDKN1B	HGNC Symbol	cyclin dependent kinase inhibitor 1B [Source:HGNC Symbol;Acc:HGNC:1785]	inner ear development
CDKN1B	HGNC Symbol	cyclin dependent kinase inhibitor 1B [Source:HGNC Symbol;Acc:HGNC:1785]	negative regulation of epithelial cell proliferation
CDKN1B	HGNC Symbol	cyclin dependent kinase inhibitor 1B [Source:HGNC Symbol;Acc:HGNC:1785]	negative regulation of cellular component movement
CDKN1B	HGNC Symbol	cyclin dependent kinase inhibitor 1B [Source:HGNC Symbol;Acc:HGNC:1785]	negative regulation of epithelial cell proliferation involved in prostate gland development
CDKN1B	HGNC Symbol	cyclin dependent kinase inhibitor 1B [Source:HGNC Symbol;Acc:HGNC:1785]	cellular response to antibiotic
CDKN1B	HGNC Symbol	cyclin dependent kinase inhibitor 1B [Source:HGNC Symbol;Acc:HGNC:1785]	cellular response to organic cyclic compound
CDKN1B	HGNC Symbol	cyclin dependent kinase inhibitor 1B [Source:HGNC Symbol;Acc:HGNC:1785]	regulation of lens fiber cell differentiation
CDKN1B	HGNC Symbol	cyclin dependent kinase inhibitor 1B [Source:HGNC Symbol;Acc:HGNC:1785]	protein-containing complex
CDKN2A	HGNC Symbol	cyclin dependent kinase inhibitor 2A [Source:HGNC Symbol;Acc:HGNC:1787]	negative regulation of NF-kappaB transcription factor activity
CDKN2A	HGNC Symbol	cyclin dependent kinase inhibitor 2A [Source:HGNC Symbol;Acc:HGNC:1787]	negative regulation of cell population proliferation
CDKN2A	HGNC Symbol	cyclin dependent kinase inhibitor 2A [Source:HGNC Symbol;Acc:HGNC:1787]	negative regulation of cell-matrix adhesion
CDKN2A	HGNC Symbol	cyclin dependent kinase inhibitor 2A [Source:HGNC Symbol;Acc:HGNC:1787]	nucleus
CDKN2A	HGNC Symbol	cyclin dependent kinase inhibitor 2A [Source:HGNC Symbol;Acc:HGNC:1787]	RNA binding
CDKN2A	HGNC Symbol	cyclin dependent kinase inhibitor 2A [Source:HGNC Symbol;Acc:HGNC:1787]	cytoplasm
CDKN2A	HGNC Symbol	cyclin dependent kinase inhibitor 2A [Source:HGNC Symbol;Acc:HGNC:1787]	kinase activity
CDKN2A	HGNC Symbol	cyclin dependent kinase inhibitor 2A [Source:HGNC Symbol;Acc:HGNC:1787]	cell cycle
CDKN2A	HGNC Symbol	cyclin dependent kinase inhibitor 2A [Source:HGNC Symbol;Acc:HGNC:1787]	phosphorylation
CDKN2A	HGNC Symbol	cyclin dependent kinase inhibitor 2A [Source:HGNC Symbol;Acc:HGNC:1787]	protein binding
CDKN2A	HGNC Symbol	cyclin dependent kinase inhibitor 2A [Source:HGNC Symbol;Acc:HGNC:1787]	cytosol
CDKN2A	HGNC Symbol	cyclin dependent kinase inhibitor 2A [Source:HGNC Symbol;Acc:HGNC:1787]	negative regulation of transcription, DNA-templated
CDKN2A	HGNC Symbol	cyclin dependent kinase inhibitor 2A [Source:HGNC Symbol;Acc:HGNC:1787]	protein kinase binding
CDKN2A	HGNC Symbol	cyclin dependent kinase inhibitor 2A [Source:HGNC Symbol;Acc:HGNC:1787]	replicative senescence
CDKN2A	HGNC Symbol	cyclin dependent kinase inhibitor 2A [Source:HGNC Symbol;Acc:HGNC:1787]	negative regulation of cell growth
CDKN2A	HGNC Symbol	cyclin dependent kinase inhibitor 2A [Source:HGNC Symbol;Acc:HGNC:1787]	cell cycle arrest
CDKN2A	HGNC Symbol	cyclin dependent kinase inhibitor 2A [Source:HGNC Symbol;Acc:HGNC:1787]	Ras protein signal transduction
CDKN2A	HGNC Symbol	cyclin dependent kinase inhibitor 2A [Source:HGNC Symbol;Acc:HGNC:1787]	cellular senescence
CDKN2A	HGNC Symbol	cyclin dependent kinase inhibitor 2A [Source:HGNC Symbol;Acc:HGNC:1787]	positive regulation of smooth muscle cell apoptotic process
CDKN2A	HGNC Symbol	cyclin dependent kinase inhibitor 2A [Source:HGNC Symbol;Acc:HGNC:1787]	NF-kappaB binding
CDKN2A	HGNC Symbol	cyclin dependent kinase inhibitor 2A [Source:HGNC Symbol;Acc:HGNC:1787]	G1/S transition of mitotic cell cycle
CDKN2A	HGNC Symbol	cyclin dependent kinase inhibitor 2A [Source:HGNC Symbol;Acc:HGNC:1787]	negative regulation of G1/S transition of mitotic cell cycle
CDKN2A	HGNC Symbol	cyclin dependent kinase inhibitor 2A [Source:HGNC Symbol;Acc:HGNC:1787]	senescence-associated heterochromatin focus assembly
CDKN2A	HGNC Symbol	cyclin dependent kinase inhibitor 2A [Source:HGNC Symbol;Acc:HGNC:1787]	positive regulation of cellular senescence
CDKN2A	HGNC Symbol	cyclin dependent kinase inhibitor 2A [Source:HGNC Symbol;Acc:HGNC:1787]	senescence-associated heterochromatin focus
CDKN2A	HGNC Symbol	cyclin dependent kinase inhibitor 2A [Source:HGNC Symbol;Acc:HGNC:1787]	negative regulation of cyclin-dependent protein serine/threonine kinase activity
CDKN2A	HGNC Symbol	cyclin dependent kinase inhibitor 2A [Source:HGNC Symbol;Acc:HGNC:1787]	cyclin-dependent protein serine/threonine kinase inhibitor activity
CDKN2A	HGNC Symbol	cyclin dependent kinase inhibitor 2A [Source:HGNC Symbol;Acc:HGNC:1787]	negative regulation of phosphorylation
CDKN2A	HGNC Symbol	cyclin dependent kinase inhibitor 2A [Source:HGNC Symbol;Acc:HGNC:1787]	positive regulation of macrophage apoptotic process
CDKN2A	HGNC Symbol	cyclin dependent kinase inhibitor 2A [Source:HGNC Symbol;Acc:HGNC:1787]	apoptotic process
CDKN2A	HGNC Symbol	cyclin dependent kinase inhibitor 2A [Source:HGNC Symbol;Acc:HGNC:1787]	protein stabilization
CDKN2A	HGNC Symbol	cyclin dependent kinase inhibitor 2A [Source:HGNC Symbol;Acc:HGNC:1787]	positive regulation of cell cycle arrest
CDKN2A	HGNC Symbol	cyclin dependent kinase inhibitor 2A [Source:HGNC Symbol;Acc:HGNC:1787]	activation of cysteine-type endopeptidase activity involved in apoptotic process
CDKN2A	HGNC Symbol	cyclin dependent kinase inhibitor 2A [Source:HGNC Symbol;Acc:HGNC:1787]	negative regulation of protein kinase activity
CDKN2A	HGNC Symbol	cyclin dependent kinase inhibitor 2A [Source:HGNC Symbol;Acc:HGNC:1787]	nucleolus
CDKN2A	HGNC Symbol	cyclin dependent kinase inhibitor 2A [Source:HGNC Symbol;Acc:HGNC:1787]	DNA binding
CDKN2A	HGNC Symbol	cyclin dependent kinase inhibitor 2A [Source:HGNC Symbol;Acc:HGNC:1787]	mitochondrion
CDKN2A	HGNC Symbol	cyclin dependent kinase inhibitor 2A [Source:HGNC Symbol;Acc:HGNC:1787]	nucleoplasm
CDKN2A	HGNC Symbol	cyclin dependent kinase inhibitor 2A [Source:HGNC Symbol;Acc:HGNC:1787]	positive regulation of transcription, DNA-templated
CDKN2A	HGNC Symbol	cyclin dependent kinase inhibitor 2A [Source:HGNC Symbol;Acc:HGNC:1787]	rRNA processing
CDKN2A	HGNC Symbol	cyclin dependent kinase inhibitor 2A [Source:HGNC Symbol;Acc:HGNC:1787]	protein sumoylation
CDKN2A	HGNC Symbol	cyclin dependent kinase inhibitor 2A [Source:HGNC Symbol;Acc:HGNC:1787]	positive regulation of transcription by RNA polymerase II
CDKN2A	HGNC Symbol	cyclin dependent kinase inhibitor 2A [Source:HGNC Symbol;Acc:HGNC:1787]	positive regulation of apoptotic process
CDKN2A	HGNC Symbol	cyclin dependent kinase inhibitor 2A [Source:HGNC Symbol;Acc:HGNC:1787]	SUMO transferase activity
CDKN2A	HGNC Symbol	cyclin dependent kinase inhibitor 2A [Source:HGNC Symbol;Acc:HGNC:1787]	protein K63-linked ubiquitination
CDKN2A	HGNC Symbol	cyclin dependent kinase inhibitor 2A [Source:HGNC Symbol;Acc:HGNC:1787]	regulation of protein stability
CDKN2A	HGNC Symbol	cyclin dependent kinase inhibitor 2A [Source:HGNC Symbol;Acc:HGNC:1787]	apoptotic mitochondrial changes
CDKN2A	HGNC Symbol	cyclin dependent kinase inhibitor 2A [Source:HGNC Symbol;Acc:HGNC:1787]	negative regulation of ubiquitin-protein transferase activity
CDKN2A	HGNC Symbol	cyclin dependent kinase inhibitor 2A [Source:HGNC Symbol;Acc:HGNC:1787]	p53 binding
CDKN2A	HGNC Symbol	cyclin dependent kinase inhibitor 2A [Source:HGNC Symbol;Acc:HGNC:1787]	negative regulation of ubiquitin-dependent protein catabolic process
CDKN2A	HGNC Symbol	cyclin dependent kinase inhibitor 2A [Source:HGNC Symbol;Acc:HGNC:1787]	protein polyubiquitination
CDKN2A	HGNC Symbol	cyclin dependent kinase inhibitor 2A [Source:HGNC Symbol;Acc:HGNC:1787]	transcription factor binding
CDKN2A	HGNC Symbol	cyclin dependent kinase inhibitor 2A [Source:HGNC Symbol;Acc:HGNC:1787]	regulation of apoptotic DNA fragmentation
CDKN2A	HGNC Symbol	cyclin dependent kinase inhibitor 2A [Source:HGNC Symbol;Acc:HGNC:1787]	disordered domain specific binding
CDKN2A	HGNC Symbol	cyclin dependent kinase inhibitor 2A [Source:HGNC Symbol;Acc:HGNC:1787]	positive regulation of gene expression
CDKN2A	HGNC Symbol	cyclin dependent kinase inhibitor 2A [Source:HGNC Symbol;Acc:HGNC:1787]	nuclear body
CDKN2A	HGNC Symbol	cyclin dependent kinase inhibitor 2A [Source:HGNC Symbol;Acc:HGNC:1787]	protein-containing complex
CDKN2A	HGNC Symbol	cyclin dependent kinase inhibitor 2A [Source:HGNC Symbol;Acc:HGNC:1787]	positive regulation of protein localization to nucleus
CDKN2A	HGNC Symbol	cyclin dependent kinase inhibitor 2A [Source:HGNC Symbol;Acc:HGNC:1787]	amyloid fibril formation
CDKN2A	HGNC Symbol	cyclin dependent kinase inhibitor 2A [Source:HGNC Symbol;Acc:HGNC:1787]	negative regulation of immature T cell proliferation in thymus
CDKN2A	HGNC Symbol	cyclin dependent kinase inhibitor 2A [Source:HGNC Symbol;Acc:HGNC:1787]	positive regulation of DNA damage response, signal transduction by p53 class mediator
CDKN2A	HGNC Symbol	cyclin dependent kinase inhibitor 2A [Source:HGNC Symbol;Acc:HGNC:1787]	ubiquitin ligase inhibitor activity
CDKN2A	HGNC Symbol	cyclin dependent kinase inhibitor 2A [Source:HGNC Symbol;Acc:HGNC:1787]	negative regulation of ubiquitin protein ligase activity
CDKN2A	HGNC Symbol	cyclin dependent kinase inhibitor 2A [Source:HGNC Symbol;Acc:HGNC:1787]	negative regulation of protein neddylation
CDKN2A	HGNC Symbol	cyclin dependent kinase inhibitor 2A [Source:HGNC Symbol;Acc:HGNC:1787]	MDM2/MDM4 family protein binding
CDKN2A	HGNC Symbol	cyclin dependent kinase inhibitor 2A [Source:HGNC Symbol;Acc:HGNC:1787]	protein destabilization
CDKN2A	HGNC Symbol	cyclin dependent kinase inhibitor 2A [Source:HGNC Symbol;Acc:HGNC:1787]	negative regulation of B cell proliferation
CDKN2A	HGNC Symbol	cyclin dependent kinase inhibitor 2A [Source:HGNC Symbol;Acc:HGNC:1787]	ubiquitin-protein transferase inhibitor activity
CDKN2A	HGNC Symbol	cyclin dependent kinase inhibitor 2A [Source:HGNC Symbol;Acc:HGNC:1787]	regulation of G2/M transition of mitotic cell cycle
CDKN2A	HGNC Symbol	cyclin dependent kinase inhibitor 2A [Source:HGNC Symbol;Acc:HGNC:1787]	positive regulation of protein sumoylation
CDKN2A	HGNC Symbol	cyclin dependent kinase inhibitor 2A [Source:HGNC Symbol;Acc:HGNC:1787]	somatic stem cell division
CDKN2A	HGNC Symbol	cyclin dependent kinase inhibitor 2A [Source:HGNC Symbol;Acc:HGNC:1787]	regulation of protein export from nucleus
CDKN2A	HGNC Symbol	cyclin dependent kinase inhibitor 2A [Source:HGNC Symbol;Acc:HGNC:1787]	positive regulation of signal transduction by p53 class mediator
CDKN2A	HGNC Symbol	cyclin dependent kinase inhibitor 2A [Source:HGNC Symbol;Acc:HGNC:1787]
CHD1	HGNC Symbol	chromodomain helicase DNA binding protein 1 [Source:HGNC Symbol;Acc:HGNC:1915]	ATP binding
CHD1	HGNC Symbol	chromodomain helicase DNA binding protein 1 [Source:HGNC Symbol;Acc:HGNC:1915]	nucleus
CHD1	HGNC Symbol	chromodomain helicase DNA binding protein 1 [Source:HGNC Symbol;Acc:HGNC:1915]	cytoplasm
CHD1	HGNC Symbol	chromodomain helicase DNA binding protein 1 [Source:HGNC Symbol;Acc:HGNC:1915]	nucleotide binding
CHD1	HGNC Symbol	chromodomain helicase DNA binding protein 1 [Source:HGNC Symbol;Acc:HGNC:1915]	hydrolase activity
CHD1	HGNC Symbol	chromodomain helicase DNA binding protein 1 [Source:HGNC Symbol;Acc:HGNC:1915]	DNA binding
CHD1	HGNC Symbol	chromodomain helicase DNA binding protein 1 [Source:HGNC Symbol;Acc:HGNC:1915]	chromatin organization
CHD1	HGNC Symbol	chromodomain helicase DNA binding protein 1 [Source:HGNC Symbol;Acc:HGNC:1915]	protein binding
CHD1	HGNC Symbol	chromodomain helicase DNA binding protein 1 [Source:HGNC Symbol;Acc:HGNC:1915]	helicase activity
CHD1	HGNC Symbol	chromodomain helicase DNA binding protein 1 [Source:HGNC Symbol;Acc:HGNC:1915]	DNA duplex unwinding
CHD1	HGNC Symbol	chromodomain helicase DNA binding protein 1 [Source:HGNC Symbol;Acc:HGNC:1915]	DNA helicase activity
CHD1	HGNC Symbol	chromodomain helicase DNA binding protein 1 [Source:HGNC Symbol;Acc:HGNC:1915]	nucleoplasm
CHD1	HGNC Symbol	chromodomain helicase DNA binding protein 1 [Source:HGNC Symbol;Acc:HGNC:1915]	regulation of transcription by RNA polymerase II
CHD1	HGNC Symbol	chromodomain helicase DNA binding protein 1 [Source:HGNC Symbol;Acc:HGNC:1915]	methylated histone binding
CHD1	HGNC Symbol	chromodomain helicase DNA binding protein 1 [Source:HGNC Symbol;Acc:HGNC:1915]	chromatin remodeling
CHD1	HGNC Symbol	chromodomain helicase DNA binding protein 1 [Source:HGNC Symbol;Acc:HGNC:1915]	covalent chromatin modification
CHD1	HGNC Symbol	chromodomain helicase DNA binding protein 1 [Source:HGNC Symbol;Acc:HGNC:1915]	positive regulation by host of viral transcription
CHD1	HGNC Symbol	chromodomain helicase DNA binding protein 1 [Source:HGNC Symbol;Acc:HGNC:1915]
CHEK2	HGNC Symbol	checkpoint kinase 2 [Source:HGNC Symbol;Acc:HGNC:16627]	ATP binding
CHEK2	HGNC Symbol	checkpoint kinase 2 [Source:HGNC Symbol;Acc:HGNC:16627]	protein phosphorylation
CHEK2	HGNC Symbol	checkpoint kinase 2 [Source:HGNC Symbol;Acc:HGNC:16627]	protein kinase activity
CHEK2	HGNC Symbol	checkpoint kinase 2 [Source:HGNC Symbol;Acc:HGNC:16627]	protein binding
CHEK2	HGNC Symbol	checkpoint kinase 2 [Source:HGNC Symbol;Acc:HGNC:16627]	nucleus
CHEK2	HGNC Symbol	checkpoint kinase 2 [Source:HGNC Symbol;Acc:HGNC:16627]	Golgi apparatus
CHEK2	HGNC Symbol	checkpoint kinase 2 [Source:HGNC Symbol;Acc:HGNC:16627]	metal ion binding
CHEK2	HGNC Symbol	checkpoint kinase 2 [Source:HGNC Symbol;Acc:HGNC:16627]	nucleotide binding
CHEK2	HGNC Symbol	checkpoint kinase 2 [Source:HGNC Symbol;Acc:HGNC:16627]	protein serine/threonine kinase activity
CHEK2	HGNC Symbol	checkpoint kinase 2 [Source:HGNC Symbol;Acc:HGNC:16627]	kinase activity
CHEK2	HGNC Symbol	checkpoint kinase 2 [Source:HGNC Symbol;Acc:HGNC:16627]	transferase activity
CHEK2	HGNC Symbol	checkpoint kinase 2 [Source:HGNC Symbol;Acc:HGNC:16627]
CHEK2	HGNC Symbol	checkpoint kinase 2 [Source:HGNC Symbol;Acc:HGNC:16627]	cell cycle
CHEK2	HGNC Symbol	checkpoint kinase 2 [Source:HGNC Symbol;Acc:HGNC:16627]	phosphorylation
CHEK2	HGNC Symbol	checkpoint kinase 2 [Source:HGNC Symbol;Acc:HGNC:16627]	nucleoplasm
CHEK2	HGNC Symbol	checkpoint kinase 2 [Source:HGNC Symbol;Acc:HGNC:16627]	apoptotic process
CHEK2	HGNC Symbol	checkpoint kinase 2 [Source:HGNC Symbol;Acc:HGNC:16627]	cell division
CHEK2	HGNC Symbol	checkpoint kinase 2 [Source:HGNC Symbol;Acc:HGNC:16627]	DNA repair
CHEK2	HGNC Symbol	checkpoint kinase 2 [Source:HGNC Symbol;Acc:HGNC:16627]	cellular response to DNA damage stimulus
CHEK2	HGNC Symbol	checkpoint kinase 2 [Source:HGNC Symbol;Acc:HGNC:16627]	protein homodimerization activity
CHEK2	HGNC Symbol	checkpoint kinase 2 [Source:HGNC Symbol;Acc:HGNC:16627]	double-strand break repair
CHEK2	HGNC Symbol	checkpoint kinase 2 [Source:HGNC Symbol;Acc:HGNC:16627]	PML body
CHEK2	HGNC Symbol	checkpoint kinase 2 [Source:HGNC Symbol;Acc:HGNC:16627]	positive regulation of transcription, DNA-templated
CHEK2	HGNC Symbol	checkpoint kinase 2 [Source:HGNC Symbol;Acc:HGNC:16627]	cytoplasm
CHEK2	HGNC Symbol	checkpoint kinase 2 [Source:HGNC Symbol;Acc:HGNC:16627]	identical protein binding
CHEK2	HGNC Symbol	checkpoint kinase 2 [Source:HGNC Symbol;Acc:HGNC:16627]	regulation of protein catabolic process
CHEK2	HGNC Symbol	checkpoint kinase 2 [Source:HGNC Symbol;Acc:HGNC:16627]	DNA damage response, signal transduction by p53 class mediator resulting in cell cycle arrest
CHEK2	HGNC Symbol	checkpoint kinase 2 [Source:HGNC Symbol;Acc:HGNC:16627]	protein kinase binding
CHEK2	HGNC Symbol	checkpoint kinase 2 [Source:HGNC Symbol;Acc:HGNC:16627]	protein stabilization
CHEK2	HGNC Symbol	checkpoint kinase 2 [Source:HGNC Symbol;Acc:HGNC:16627]	cellular protein catabolic process
CHEK2	HGNC Symbol	checkpoint kinase 2 [Source:HGNC Symbol;Acc:HGNC:16627]	ubiquitin protein ligase binding
CHEK2	HGNC Symbol	checkpoint kinase 2 [Source:HGNC Symbol;Acc:HGNC:16627]	regulation of transcription, DNA-templated
CHEK2	HGNC Symbol	checkpoint kinase 2 [Source:HGNC Symbol;Acc:HGNC:16627]	mitotic spindle assembly
CHEK2	HGNC Symbol	checkpoint kinase 2 [Source:HGNC Symbol;Acc:HGNC:16627]	regulation of signal transduction by p53 class mediator
CHEK2	HGNC Symbol	checkpoint kinase 2 [Source:HGNC Symbol;Acc:HGNC:16627]	protein autophosphorylation
CHEK2	HGNC Symbol	checkpoint kinase 2 [Source:HGNC Symbol;Acc:HGNC:16627]	replicative senescence
CHEK2	HGNC Symbol	checkpoint kinase 2 [Source:HGNC Symbol;Acc:HGNC:16627]	chromosome, telomeric region
CHEK2	HGNC Symbol	checkpoint kinase 2 [Source:HGNC Symbol;Acc:HGNC:16627]	DNA damage checkpoint
CHEK2	HGNC Symbol	checkpoint kinase 2 [Source:HGNC Symbol;Acc:HGNC:16627]	DNA damage induced protein phosphorylation
CHEK2	HGNC Symbol	checkpoint kinase 2 [Source:HGNC Symbol;Acc:HGNC:16627]	G2/M transition of mitotic cell cycle
CHEK2	HGNC Symbol	checkpoint kinase 2 [Source:HGNC Symbol;Acc:HGNC:16627]	signal transduction in response to DNA damage
CHEK2	HGNC Symbol	checkpoint kinase 2 [Source:HGNC Symbol;Acc:HGNC:16627]	intrinsic apoptotic signaling pathway in response to DNA damage
CHEK2	HGNC Symbol	checkpoint kinase 2 [Source:HGNC Symbol;Acc:HGNC:16627]	mitotic DNA damage checkpoint
CHEK2	HGNC Symbol	checkpoint kinase 2 [Source:HGNC Symbol;Acc:HGNC:16627]	signal transduction involved in intra-S DNA damage checkpoint
CHEK2	HGNC Symbol	checkpoint kinase 2 [Source:HGNC Symbol;Acc:HGNC:16627]	positive regulation of protein phosphorylation
CHEK2	HGNC Symbol	checkpoint kinase 2 [Source:HGNC Symbol;Acc:HGNC:16627]	DNA damage response, signal transduction by p53 class mediator resulting in transcription of p21 class mediator
CHEK2	HGNC Symbol	checkpoint kinase 2 [Source:HGNC Symbol;Acc:HGNC:16627]	response to gamma radiation
CHEK2	HGNC Symbol	checkpoint kinase 2 [Source:HGNC Symbol;Acc:HGNC:16627]	peptidyl-serine phosphorylation
CHEK2	HGNC Symbol	checkpoint kinase 2 [Source:HGNC Symbol;Acc:HGNC:16627]	cellular response to drug
CHEK2	HGNC Symbol	checkpoint kinase 2 [Source:HGNC Symbol;Acc:HGNC:16627]	intrinsic apoptotic signaling pathway in response to DNA damage by p53 class mediator
CHEK2	HGNC Symbol	checkpoint kinase 2 [Source:HGNC Symbol;Acc:HGNC:16627]	negative regulation of cell cycle arrest
CHEK2	HGNC Symbol	checkpoint kinase 2 [Source:HGNC Symbol;Acc:HGNC:16627]	cellular response to gamma radiation
CHEK2	HGNC Symbol	checkpoint kinase 2 [Source:HGNC Symbol;Acc:HGNC:16627]	response to glycoside
CHEK2	HGNC Symbol	checkpoint kinase 2 [Source:HGNC Symbol;Acc:HGNC:16627]	cellular response to bisphenol A
CHEK2	HGNC Symbol	checkpoint kinase 2 [Source:HGNC Symbol;Acc:HGNC:16627]	negative regulation of DNA damage checkpoint
CHEK2	HGNC Symbol	checkpoint kinase 2 [Source:HGNC Symbol;Acc:HGNC:16627]	positive regulation of anoikis
CLK3	HGNC Symbol	CDC like kinase 3 [Source:HGNC Symbol;Acc:HGNC:2071]
CLK3	HGNC Symbol	CDC like kinase 3 [Source:HGNC Symbol;Acc:HGNC:2071]	ATP binding
CLK3	HGNC Symbol	CDC like kinase 3 [Source:HGNC Symbol;Acc:HGNC:2071]	protein phosphorylation
CLK3	HGNC Symbol	CDC like kinase 3 [Source:HGNC Symbol;Acc:HGNC:2071]	protein kinase activity
CLK3	HGNC Symbol	CDC like kinase 3 [Source:HGNC Symbol;Acc:HGNC:2071]	nucleus
CLK3	HGNC Symbol	CDC like kinase 3 [Source:HGNC Symbol;Acc:HGNC:2071]	RNA binding
CLK3	HGNC Symbol	CDC like kinase 3 [Source:HGNC Symbol;Acc:HGNC:2071]	cytoplasm
CLK3	HGNC Symbol	CDC like kinase 3 [Source:HGNC Symbol;Acc:HGNC:2071]	nuclear speck
CLK3	HGNC Symbol	CDC like kinase 3 [Source:HGNC Symbol;Acc:HGNC:2071]	membrane
CLK3	HGNC Symbol	CDC like kinase 3 [Source:HGNC Symbol;Acc:HGNC:2071]	nucleotide binding
CLK3	HGNC Symbol	CDC like kinase 3 [Source:HGNC Symbol;Acc:HGNC:2071]	protein serine/threonine kinase activity
CLK3	HGNC Symbol	CDC like kinase 3 [Source:HGNC Symbol;Acc:HGNC:2071]	kinase activity
CLK3	HGNC Symbol	CDC like kinase 3 [Source:HGNC Symbol;Acc:HGNC:2071]	transferase activity
CLK3	HGNC Symbol	CDC like kinase 3 [Source:HGNC Symbol;Acc:HGNC:2071]	phosphorylation
CLK3	HGNC Symbol	CDC like kinase 3 [Source:HGNC Symbol;Acc:HGNC:2071]	nucleoplasm
CLK3	HGNC Symbol	CDC like kinase 3 [Source:HGNC Symbol;Acc:HGNC:2071]	protein tyrosine kinase activity
CLK3	HGNC Symbol	CDC like kinase 3 [Source:HGNC Symbol;Acc:HGNC:2071]	cytoplasmic vesicle
CLK3	HGNC Symbol	CDC like kinase 3 [Source:HGNC Symbol;Acc:HGNC:2071]	intermediate filament cytoskeleton
CLK3	HGNC Symbol	CDC like kinase 3 [Source:HGNC Symbol;Acc:HGNC:2071]	protein serine/threonine/tyrosine kinase activity
CLK3	HGNC Symbol	CDC like kinase 3 [Source:HGNC Symbol;Acc:HGNC:2071]	protein binding
CLK3	HGNC Symbol	CDC like kinase 3 [Source:HGNC Symbol;Acc:HGNC:2071]	acrosomal vesicle
CLK3	HGNC Symbol	CDC like kinase 3 [Source:HGNC Symbol;Acc:HGNC:2071]	identical protein binding
CLK3	HGNC Symbol	CDC like kinase 3 [Source:HGNC Symbol;Acc:HGNC:2071]	regulation of RNA splicing
CLK3	HGNC Symbol	CDC like kinase 3 [Source:HGNC Symbol;Acc:HGNC:2071]	peptidyl-tyrosine phosphorylation
CLK3	HGNC Symbol	CDC like kinase 3 [Source:HGNC Symbol;Acc:HGNC:2071]	protein autophosphorylation
CLRN2	HGNC Symbol	clarin 2 [Source:HGNC Symbol;Acc:HGNC:33939]	membrane
CLRN2	HGNC Symbol	clarin 2 [Source:HGNC Symbol;Acc:HGNC:33939]	integral component of membrane
CLRN2	HGNC Symbol	clarin 2 [Source:HGNC Symbol;Acc:HGNC:33939]	protein binding
COL12A1	HGNC Symbol	collagen type XII alpha 1 chain [Source:HGNC Symbol;Acc:HGNC:2188]	collagen trimer
COL12A1	HGNC Symbol	collagen type XII alpha 1 chain [Source:HGNC Symbol;Acc:HGNC:2188]	protein binding
COL12A1	HGNC Symbol	collagen type XII alpha 1 chain [Source:HGNC Symbol;Acc:HGNC:2188]	extracellular space
COL12A1	HGNC Symbol	collagen type XII alpha 1 chain [Source:HGNC Symbol;Acc:HGNC:2188]	cell adhesion
COL12A1	HGNC Symbol	collagen type XII alpha 1 chain [Source:HGNC Symbol;Acc:HGNC:2188]	extracellular region
COL12A1	HGNC Symbol	collagen type XII alpha 1 chain [Source:HGNC Symbol;Acc:HGNC:2188]	extracellular exosome
COL12A1	HGNC Symbol	collagen type XII alpha 1 chain [Source:HGNC Symbol;Acc:HGNC:2188]	collagen-containing extracellular matrix
COL12A1	HGNC Symbol	collagen type XII alpha 1 chain [Source:HGNC Symbol;Acc:HGNC:2188]	extracellular matrix structural constituent conferring tensile strength
COL12A1	HGNC Symbol	collagen type XII alpha 1 chain [Source:HGNC Symbol;Acc:HGNC:2188]	endoplasmic reticulum lumen
COL12A1	HGNC Symbol	collagen type XII alpha 1 chain [Source:HGNC Symbol;Acc:HGNC:2188]	extracellular vesicle
COL12A1	HGNC Symbol	collagen type XII alpha 1 chain [Source:HGNC Symbol;Acc:HGNC:2188]	collagen fibril organization
COL12A1	HGNC Symbol	collagen type XII alpha 1 chain [Source:HGNC Symbol;Acc:HGNC:2188]	endodermal cell differentiation
COL12A1	HGNC Symbol	collagen type XII alpha 1 chain [Source:HGNC Symbol;Acc:HGNC:2188]	collagen type XII trimer
COL12A1	HGNC Symbol	collagen type XII alpha 1 chain [Source:HGNC Symbol;Acc:HGNC:2188]
COL22A1	HGNC Symbol	collagen type XXII alpha 1 chain [Source:HGNC Symbol;Acc:HGNC:22989]
COL22A1	HGNC Symbol	collagen type XXII alpha 1 chain [Source:HGNC Symbol;Acc:HGNC:22989]	cytoplasm
COL22A1	HGNC Symbol	collagen type XXII alpha 1 chain [Source:HGNC Symbol;Acc:HGNC:22989]	extracellular region
COL22A1	HGNC Symbol	collagen type XXII alpha 1 chain [Source:HGNC Symbol;Acc:HGNC:22989]	collagen trimer
COL22A1	HGNC Symbol	collagen type XXII alpha 1 chain [Source:HGNC Symbol;Acc:HGNC:22989]	extracellular space
COL22A1	HGNC Symbol	collagen type XXII alpha 1 chain [Source:HGNC Symbol;Acc:HGNC:22989]	extracellular matrix structural constituent
COL22A1	HGNC Symbol	collagen type XXII alpha 1 chain [Source:HGNC Symbol;Acc:HGNC:22989]	extracellular matrix organization
COL22A1	HGNC Symbol	collagen type XXII alpha 1 chain [Source:HGNC Symbol;Acc:HGNC:22989]	extracellular matrix
COL22A1	HGNC Symbol	collagen type XXII alpha 1 chain [Source:HGNC Symbol;Acc:HGNC:22989]	angiogenesis
COL22A1	HGNC Symbol	collagen type XXII alpha 1 chain [Source:HGNC Symbol;Acc:HGNC:22989]	endoplasmic reticulum lumen
COL22A1	HGNC Symbol	collagen type XXII alpha 1 chain [Source:HGNC Symbol;Acc:HGNC:22989]	endothelial cell morphogenesis
COL6A3	HGNC Symbol	collagen type VI alpha 3 chain [Source:HGNC Symbol;Acc:HGNC:2213]
COL6A3	HGNC Symbol	collagen type VI alpha 3 chain [Source:HGNC Symbol;Acc:HGNC:2213]	protein binding
COL6A3	HGNC Symbol	collagen type VI alpha 3 chain [Source:HGNC Symbol;Acc:HGNC:2213]	serine-type endopeptidase inhibitor activity
COL6A3	HGNC Symbol	collagen type VI alpha 3 chain [Source:HGNC Symbol;Acc:HGNC:2213]	extracellular space
COL6A3	HGNC Symbol	collagen type VI alpha 3 chain [Source:HGNC Symbol;Acc:HGNC:2213]	cell adhesion
COL6A3	HGNC Symbol	collagen type VI alpha 3 chain [Source:HGNC Symbol;Acc:HGNC:2213]	extracellular region
COL6A3	HGNC Symbol	collagen type VI alpha 3 chain [Source:HGNC Symbol;Acc:HGNC:2213]	collagen trimer
COL6A3	HGNC Symbol	collagen type VI alpha 3 chain [Source:HGNC Symbol;Acc:HGNC:2213]	negative regulation of endopeptidase activity
COL6A3	HGNC Symbol	collagen type VI alpha 3 chain [Source:HGNC Symbol;Acc:HGNC:2213]	peptidase inhibitor activity
COL6A3	HGNC Symbol	collagen type VI alpha 3 chain [Source:HGNC Symbol;Acc:HGNC:2213]	negative regulation of peptidase activity
COL6A3	HGNC Symbol	collagen type VI alpha 3 chain [Source:HGNC Symbol;Acc:HGNC:2213]	extracellular exosome
COL6A3	HGNC Symbol	collagen type VI alpha 3 chain [Source:HGNC Symbol;Acc:HGNC:2213]	collagen-containing extracellular matrix
COL6A3	HGNC Symbol	collagen type VI alpha 3 chain [Source:HGNC Symbol;Acc:HGNC:2213]	extracellular matrix structural constituent conferring tensile strength
COL6A3	HGNC Symbol	collagen type VI alpha 3 chain [Source:HGNC Symbol;Acc:HGNC:2213]	extracellular matrix
COL6A3	HGNC Symbol	collagen type VI alpha 3 chain [Source:HGNC Symbol;Acc:HGNC:2213]	sarcolemma
COL6A3	HGNC Symbol	collagen type VI alpha 3 chain [Source:HGNC Symbol;Acc:HGNC:2213]	endoplasmic reticulum lumen
COL6A3	HGNC Symbol	collagen type VI alpha 3 chain [Source:HGNC Symbol;Acc:HGNC:2213]	extracellular matrix organization
COL6A3	HGNC Symbol	collagen type VI alpha 3 chain [Source:HGNC Symbol;Acc:HGNC:2213]	extracellular vesicle
COL6A3	HGNC Symbol	collagen type VI alpha 3 chain [Source:HGNC Symbol;Acc:HGNC:2213]	muscle organ development
COL6A3	HGNC Symbol	collagen type VI alpha 3 chain [Source:HGNC Symbol;Acc:HGNC:2213]	collagen type VI trimer
CTCF	HGNC Symbol	CCCTC-binding factor [Source:HGNC Symbol;Acc:HGNC:13723]	nucleic acid binding
CTCF	HGNC Symbol	CCCTC-binding factor [Source:HGNC Symbol;Acc:HGNC:13723]	nucleus
CTCF	HGNC Symbol	CCCTC-binding factor [Source:HGNC Symbol;Acc:HGNC:13723]	metal ion binding
CTCF	HGNC Symbol	CCCTC-binding factor [Source:HGNC Symbol;Acc:HGNC:13723]	nucleoplasm
CTCF	HGNC Symbol	CCCTC-binding factor [Source:HGNC Symbol;Acc:HGNC:13723]	zinc ion binding
CTCF	HGNC Symbol	CCCTC-binding factor [Source:HGNC Symbol;Acc:HGNC:13723]	DNA binding
CTCF	HGNC Symbol	CCCTC-binding factor [Source:HGNC Symbol;Acc:HGNC:13723]	chromatin organization
CTCF	HGNC Symbol	CCCTC-binding factor [Source:HGNC Symbol;Acc:HGNC:13723]	DNA-binding transcription factor activity
CTCF	HGNC Symbol	CCCTC-binding factor [Source:HGNC Symbol;Acc:HGNC:13723]	chromosome
CTCF	HGNC Symbol	CCCTC-binding factor [Source:HGNC Symbol;Acc:HGNC:13723]	nucleolus
CTCF	HGNC Symbol	CCCTC-binding factor [Source:HGNC Symbol;Acc:HGNC:13723]	protein binding
CTCF	HGNC Symbol	CCCTC-binding factor [Source:HGNC Symbol;Acc:HGNC:13723]	chromosome segregation
CTCF	HGNC Symbol	CCCTC-binding factor [Source:HGNC Symbol;Acc:HGNC:13723]	chromosome, centromeric region
CTCF	HGNC Symbol	CCCTC-binding factor [Source:HGNC Symbol;Acc:HGNC:13723]	positive regulation of transcription, DNA-templated
CTCF	HGNC Symbol	CCCTC-binding factor [Source:HGNC Symbol;Acc:HGNC:13723]	sequence-specific DNA binding
CTCF	HGNC Symbol	CCCTC-binding factor [Source:HGNC Symbol;Acc:HGNC:13723]	regulation of transcription by RNA polymerase II
CTCF	HGNC Symbol	CCCTC-binding factor [Source:HGNC Symbol;Acc:HGNC:13723]	negative regulation of transcription by RNA polymerase II
CTCF	HGNC Symbol	CCCTC-binding factor [Source:HGNC Symbol;Acc:HGNC:13723]	nuclear chromatin
CTCF	HGNC Symbol	CCCTC-binding factor [Source:HGNC Symbol;Acc:HGNC:13723]	RNA polymerase II cis-regulatory region sequence-specific DNA binding
CTCF	HGNC Symbol	CCCTC-binding factor [Source:HGNC Symbol;Acc:HGNC:13723]	DNA-binding transcription repressor activity, RNA polymerase II-specific
CTCF	HGNC Symbol	CCCTC-binding factor [Source:HGNC Symbol;Acc:HGNC:13723]	positive regulation of gene expression
CTCF	HGNC Symbol	CCCTC-binding factor [Source:HGNC Symbol;Acc:HGNC:13723]	negative regulation of cell population proliferation
CTCF	HGNC Symbol	CCCTC-binding factor [Source:HGNC Symbol;Acc:HGNC:13723]	transcription regulatory region sequence-specific DNA binding
CTCF	HGNC Symbol	CCCTC-binding factor [Source:HGNC Symbol;Acc:HGNC:13723]	negative regulation of transcription, DNA-templated
CTCF	HGNC Symbol	CCCTC-binding factor [Source:HGNC Symbol;Acc:HGNC:13723]	nucleosome positioning
CTCF	HGNC Symbol	CCCTC-binding factor [Source:HGNC Symbol;Acc:HGNC:13723]	condensed chromosome
CTCF	HGNC Symbol	CCCTC-binding factor [Source:HGNC Symbol;Acc:HGNC:13723]	regulation of gene expression, epigenetic
CTCF	HGNC Symbol	CCCTC-binding factor [Source:HGNC Symbol;Acc:HGNC:13723]	chromatin insulator sequence binding
CTCF	HGNC Symbol	CCCTC-binding factor [Source:HGNC Symbol;Acc:HGNC:13723]	regulation of molecular function, epigenetic
CTCF	HGNC Symbol	CCCTC-binding factor [Source:HGNC Symbol;Acc:HGNC:13723]	regulation of centromeric sister chromatid cohesion
CTCF	HGNC Symbol	CCCTC-binding factor [Source:HGNC Symbol;Acc:HGNC:13723]	protein localization to chromosome, centromeric region
CTCF	HGNC Symbol	CCCTC-binding factor [Source:HGNC Symbol;Acc:HGNC:13723]	genetic imprinting
CTCF	HGNC Symbol	CCCTC-binding factor [Source:HGNC Symbol;Acc:HGNC:13723]	chromatin binding
CTCF	HGNC Symbol	CCCTC-binding factor [Source:HGNC Symbol;Acc:HGNC:13723]	DNA methylation
CTCF	HGNC Symbol	CCCTC-binding factor [Source:HGNC Symbol;Acc:HGNC:13723]	regulation of gene expression by genetic imprinting
CTCF	HGNC Symbol	CCCTC-binding factor [Source:HGNC Symbol;Acc:HGNC:13723]	regulation of transcription, DNA-templated
CTCF	HGNC Symbol	CCCTC-binding factor [Source:HGNC Symbol;Acc:HGNC:13723]	maintenance of DNA methylation
CTCF	HGNC Symbol	CCCTC-binding factor [Source:HGNC Symbol;Acc:HGNC:13723]	negative regulation of gene expression
CTCF	HGNC Symbol	CCCTC-binding factor [Source:HGNC Symbol;Acc:HGNC:13723]	regulation of histone methylation
CTCF	HGNC Symbol	CCCTC-binding factor [Source:HGNC Symbol;Acc:HGNC:13723]	regulation of histone acetylation
CTCF	HGNC Symbol	CCCTC-binding factor [Source:HGNC Symbol;Acc:HGNC:13723]
CTNNA1	HGNC Symbol	catenin alpha 1 [Source:HGNC Symbol;Acc:HGNC:2509]	cell adhesion
CTNNA1	HGNC Symbol	catenin alpha 1 [Source:HGNC Symbol;Acc:HGNC:2509]	cadherin binding
CTNNA1	HGNC Symbol	catenin alpha 1 [Source:HGNC Symbol;Acc:HGNC:2509]	actin filament binding
CTNNA1	HGNC Symbol	catenin alpha 1 [Source:HGNC Symbol;Acc:HGNC:2509]	cytoplasm
CTNNA1	HGNC Symbol	catenin alpha 1 [Source:HGNC Symbol;Acc:HGNC:2509]	cytoskeleton
CTNNA1	HGNC Symbol	catenin alpha 1 [Source:HGNC Symbol;Acc:HGNC:2509]	structural molecule activity
CTNNA1	HGNC Symbol	catenin alpha 1 [Source:HGNC Symbol;Acc:HGNC:2509]	actin cytoskeleton
CTNNA1	HGNC Symbol	catenin alpha 1 [Source:HGNC Symbol;Acc:HGNC:2509]	RNA binding
CTNNA1	HGNC Symbol	catenin alpha 1 [Source:HGNC Symbol;Acc:HGNC:2509]	membrane
CTNNA1	HGNC Symbol	catenin alpha 1 [Source:HGNC Symbol;Acc:HGNC:2509]	intracellular membrane-bounded organelle
CTNNA1	HGNC Symbol	catenin alpha 1 [Source:HGNC Symbol;Acc:HGNC:2509]	plasma membrane
CTNNA1	HGNC Symbol	catenin alpha 1 [Source:HGNC Symbol;Acc:HGNC:2509]	focal adhesion
CTNNA1	HGNC Symbol	catenin alpha 1 [Source:HGNC Symbol;Acc:HGNC:2509]	adherens junction
CTNNA1	HGNC Symbol	catenin alpha 1 [Source:HGNC Symbol;Acc:HGNC:2509]	cell junction
CTNNA1	HGNC Symbol	catenin alpha 1 [Source:HGNC Symbol;Acc:HGNC:2509]	protein binding
CTNNA1	HGNC Symbol	catenin alpha 1 [Source:HGNC Symbol;Acc:HGNC:2509]	identical protein binding
CTNNA1	HGNC Symbol	catenin alpha 1 [Source:HGNC Symbol;Acc:HGNC:2509]	protein-containing complex binding
CTNNA1	HGNC Symbol	catenin alpha 1 [Source:HGNC Symbol;Acc:HGNC:2509]	ovarian follicle development
CTNNA1	HGNC Symbol	catenin alpha 1 [Source:HGNC Symbol;Acc:HGNC:2509]	establishment or maintenance of cell polarity
CTNNA1	HGNC Symbol	catenin alpha 1 [Source:HGNC Symbol;Acc:HGNC:2509]	negative regulation of neuroblast proliferation
CTNNA1	HGNC Symbol	catenin alpha 1 [Source:HGNC Symbol;Acc:HGNC:2509]	aging
CTNNA1	HGNC Symbol	catenin alpha 1 [Source:HGNC Symbol;Acc:HGNC:2509]	male gonad development
CTNNA1	HGNC Symbol	catenin alpha 1 [Source:HGNC Symbol;Acc:HGNC:2509]	response to organic cyclic compound
CTNNA1	HGNC Symbol	catenin alpha 1 [Source:HGNC Symbol;Acc:HGNC:2509]	gap junction assembly
CTNNA1	HGNC Symbol	catenin alpha 1 [Source:HGNC Symbol;Acc:HGNC:2509]	axon regeneration
CTNNA1	HGNC Symbol	catenin alpha 1 [Source:HGNC Symbol;Acc:HGNC:2509]	cellular protein localization
CTNNA1	HGNC Symbol	catenin alpha 1 [Source:HGNC Symbol;Acc:HGNC:2509]	regulation of cell population proliferation
CTNNA1	HGNC Symbol	catenin alpha 1 [Source:HGNC Symbol;Acc:HGNC:2509]	odontogenesis of dentin-containing tooth
CTNNA1	HGNC Symbol	catenin alpha 1 [Source:HGNC Symbol;Acc:HGNC:2509]	negative regulation of apoptotic process
CTNNA1	HGNC Symbol	catenin alpha 1 [Source:HGNC Symbol;Acc:HGNC:2509]	apical junction assembly
CTNNA1	HGNC Symbol	catenin alpha 1 [Source:HGNC Symbol;Acc:HGNC:2509]	response to estrogen
CTNNA1	HGNC Symbol	catenin alpha 1 [Source:HGNC Symbol;Acc:HGNC:2509]	positive regulation of smoothened signaling pathway
CTNNA1	HGNC Symbol	catenin alpha 1 [Source:HGNC Symbol;Acc:HGNC:2509]	epithelial cell-cell adhesion
CTNNA1	HGNC Symbol	catenin alpha 1 [Source:HGNC Symbol;Acc:HGNC:2509]	negative regulation of protein localization to nucleus
CTNNA1	HGNC Symbol	catenin alpha 1 [Source:HGNC Symbol;Acc:HGNC:2509]	negative regulation of cell motility
CTNNA1	HGNC Symbol	catenin alpha 1 [Source:HGNC Symbol;Acc:HGNC:2509]	negative regulation of integrin-mediated signaling pathway
CTNNA1	HGNC Symbol	catenin alpha 1 [Source:HGNC Symbol;Acc:HGNC:2509]	negative regulation of extrinsic apoptotic signaling pathway in absence of ligand
CTNNA1	HGNC Symbol	catenin alpha 1 [Source:HGNC Symbol;Acc:HGNC:2509]	positive regulation of extrinsic apoptotic signaling pathway in absence of ligand
CTNNA1	HGNC Symbol	catenin alpha 1 [Source:HGNC Symbol;Acc:HGNC:2509]	acrosomal vesicle
CTNNA1	HGNC Symbol	catenin alpha 1 [Source:HGNC Symbol;Acc:HGNC:2509]	cell-cell junction
CTNNA1	HGNC Symbol	catenin alpha 1 [Source:HGNC Symbol;Acc:HGNC:2509]	zonula adherens
CTNNA1	HGNC Symbol	catenin alpha 1 [Source:HGNC Symbol;Acc:HGNC:2509]	intercalated disc
CTNNA1	HGNC Symbol	catenin alpha 1 [Source:HGNC Symbol;Acc:HGNC:2509]	flotillin complex
CTNNA1	HGNC Symbol	catenin alpha 1 [Source:HGNC Symbol;Acc:HGNC:2509]	lamellipodium
CTNNA1	HGNC Symbol	catenin alpha 1 [Source:HGNC Symbol;Acc:HGNC:2509]	cytosol
CTNNA1	HGNC Symbol	catenin alpha 1 [Source:HGNC Symbol;Acc:HGNC:2509]	beta-catenin binding
CTNNA1	HGNC Symbol	catenin alpha 1 [Source:HGNC Symbol;Acc:HGNC:2509]	vinculin binding
CTNNA1	HGNC Symbol	catenin alpha 1 [Source:HGNC Symbol;Acc:HGNC:2509]	catenin complex
CTNNA1	HGNC Symbol	catenin alpha 1 [Source:HGNC Symbol;Acc:HGNC:2509]	positive regulation of muscle cell differentiation
CTNNA1	HGNC Symbol	catenin alpha 1 [Source:HGNC Symbol;Acc:HGNC:2509]	adherens junction organization
CTNNA1	HGNC Symbol	catenin alpha 1 [Source:HGNC Symbol;Acc:HGNC:2509]	gamma-catenin binding
CTNNA1	HGNC Symbol	catenin alpha 1 [Source:HGNC Symbol;Acc:HGNC:2509]	cellular response to indole-3-methanol
CTNNA1	HGNC Symbol	catenin alpha 1 [Source:HGNC Symbol;Acc:HGNC:2509]
CTNNA3	HGNC Symbol	catenin alpha 3 [Source:HGNC Symbol;Acc:HGNC:2511]	cell adhesion
CTNNA3	HGNC Symbol	catenin alpha 3 [Source:HGNC Symbol;Acc:HGNC:2511]	cadherin binding
CTNNA3	HGNC Symbol	catenin alpha 3 [Source:HGNC Symbol;Acc:HGNC:2511]	actin filament binding
CTNNA3	HGNC Symbol	catenin alpha 3 [Source:HGNC Symbol;Acc:HGNC:2511]	adherens junction
CTNNA3	HGNC Symbol	catenin alpha 3 [Source:HGNC Symbol;Acc:HGNC:2511]	cytoplasm
CTNNA3	HGNC Symbol	catenin alpha 3 [Source:HGNC Symbol;Acc:HGNC:2511]	cytoskeleton
CTNNA3	HGNC Symbol	catenin alpha 3 [Source:HGNC Symbol;Acc:HGNC:2511]	protein binding
CTNNA3	HGNC Symbol	catenin alpha 3 [Source:HGNC Symbol;Acc:HGNC:2511]	beta-catenin binding
CTNNA3	HGNC Symbol	catenin alpha 3 [Source:HGNC Symbol;Acc:HGNC:2511]	cell-cell adhesion
CTNNA3	HGNC Symbol	catenin alpha 3 [Source:HGNC Symbol;Acc:HGNC:2511]	regulation of heart rate by cardiac conduction
CTNNA3	HGNC Symbol	catenin alpha 3 [Source:HGNC Symbol;Acc:HGNC:2511]	bundle of His cell-Purkinje myocyte adhesion involved in cell communication
CTNNA3	HGNC Symbol	catenin alpha 3 [Source:HGNC Symbol;Acc:HGNC:2511]	regulation of ventricular cardiac muscle cell action potential
CTNNA3	HGNC Symbol	catenin alpha 3 [Source:HGNC Symbol;Acc:HGNC:2511]	fascia adherens
CTNNA3	HGNC Symbol	catenin alpha 3 [Source:HGNC Symbol;Acc:HGNC:2511]	lamellipodium
CTNNA3	HGNC Symbol	catenin alpha 3 [Source:HGNC Symbol;Acc:HGNC:2511]
DCAF4L2	HGNC Symbol	DDB1 and CUL4 associated factor 4 like 2 [Source:HGNC Symbol;Acc:HGNC:26657]	protein binding
DNAH11	HGNC Symbol	dynein axonemal heavy chain 11 [Source:HGNC Symbol;Acc:HGNC:2942]	ATP binding
DNAH11	HGNC Symbol	dynein axonemal heavy chain 11 [Source:HGNC Symbol;Acc:HGNC:2942]	dynein complex
DNAH11	HGNC Symbol	dynein axonemal heavy chain 11 [Source:HGNC Symbol;Acc:HGNC:2942]	microtubule motor activity
DNAH11	HGNC Symbol	dynein axonemal heavy chain 11 [Source:HGNC Symbol;Acc:HGNC:2942]	microtubule-based movement
DNAH11	HGNC Symbol	dynein axonemal heavy chain 11 [Source:HGNC Symbol;Acc:HGNC:2942]	cytoplasm
DNAH11	HGNC Symbol	dynein axonemal heavy chain 11 [Source:HGNC Symbol;Acc:HGNC:2942]	nucleotide binding
DNAH11	HGNC Symbol	dynein axonemal heavy chain 11 [Source:HGNC Symbol;Acc:HGNC:2942]	cytoskeleton
DNAH11	HGNC Symbol	dynein axonemal heavy chain 11 [Source:HGNC Symbol;Acc:HGNC:2942]	cilium
DNAH11	HGNC Symbol	dynein axonemal heavy chain 11 [Source:HGNC Symbol;Acc:HGNC:2942]	motile cilium
DNAH11	HGNC Symbol	dynein axonemal heavy chain 11 [Source:HGNC Symbol;Acc:HGNC:2942]	motor activity
DNAH11	HGNC Symbol	dynein axonemal heavy chain 11 [Source:HGNC Symbol;Acc:HGNC:2942]	cell projection
DNAH11	HGNC Symbol	dynein axonemal heavy chain 11 [Source:HGNC Symbol;Acc:HGNC:2942]	microtubule
DNAH11	HGNC Symbol	dynein axonemal heavy chain 11 [Source:HGNC Symbol;Acc:HGNC:2942]	extracellular region
DNAH11	HGNC Symbol	dynein axonemal heavy chain 11 [Source:HGNC Symbol;Acc:HGNC:2942]	ATP-dependent microtubule motor activity, minus-end-directed
DNAH11	HGNC Symbol	dynein axonemal heavy chain 11 [Source:HGNC Symbol;Acc:HGNC:2942]	determination of left/right symmetry
DNAH11	HGNC Symbol	dynein axonemal heavy chain 11 [Source:HGNC Symbol;Acc:HGNC:2942]	axoneme
DNAH11	HGNC Symbol	dynein axonemal heavy chain 11 [Source:HGNC Symbol;Acc:HGNC:2942]	dynein light intermediate chain binding
DNAH11	HGNC Symbol	dynein axonemal heavy chain 11 [Source:HGNC Symbol;Acc:HGNC:2942]	cilium movement
DNAH11	HGNC Symbol	dynein axonemal heavy chain 11 [Source:HGNC Symbol;Acc:HGNC:2942]	9+2 motile cilium
DNAH11	HGNC Symbol	dynein axonemal heavy chain 11 [Source:HGNC Symbol;Acc:HGNC:2942]	dynein intermediate chain binding
DNAH11	HGNC Symbol	dynein axonemal heavy chain 11 [Source:HGNC Symbol;Acc:HGNC:2942]	regulation of cilium beat frequency
DNAH11	HGNC Symbol	dynein axonemal heavy chain 11 [Source:HGNC Symbol;Acc:HGNC:2942]	flagellated sperm motility
DNAH11	HGNC Symbol	dynein axonemal heavy chain 11 [Source:HGNC Symbol;Acc:HGNC:2942]	proximal portion of axoneme
DNAH11	HGNC Symbol	dynein axonemal heavy chain 11 [Source:HGNC Symbol;Acc:HGNC:2942]
DNAH11	HGNC Symbol	dynein axonemal heavy chain 11 [Source:HGNC Symbol;Acc:HGNC:2942]	epithelial cilium movement involved in extracellular fluid movement
DNAH11	HGNC Symbol	dynein axonemal heavy chain 11 [Source:HGNC Symbol;Acc:HGNC:2942]	heart development
DNAH11	HGNC Symbol	dynein axonemal heavy chain 11 [Source:HGNC Symbol;Acc:HGNC:2942]	learning or memory
DNAH11	HGNC Symbol	dynein axonemal heavy chain 11 [Source:HGNC Symbol;Acc:HGNC:2942]	determination of left/right asymmetry in nervous system
DNAH11	HGNC Symbol	dynein axonemal heavy chain 11 [Source:HGNC Symbol;Acc:HGNC:2942]	epithelial cilium movement involved in determination of left/right asymmetry
DNAH11	HGNC Symbol	dynein axonemal heavy chain 11 [Source:HGNC Symbol;Acc:HGNC:2942]	cardiac septum morphogenesis
DNAH11	HGNC Symbol	dynein axonemal heavy chain 11 [Source:HGNC Symbol;Acc:HGNC:2942]	9+0 motile cilium
DNAH2	HGNC Symbol	dynein axonemal heavy chain 2 [Source:HGNC Symbol;Acc:HGNC:2948]	ATP binding
DNAH2	HGNC Symbol	dynein axonemal heavy chain 2 [Source:HGNC Symbol;Acc:HGNC:2948]	dynein complex
DNAH2	HGNC Symbol	dynein axonemal heavy chain 2 [Source:HGNC Symbol;Acc:HGNC:2948]	microtubule motor activity
DNAH2	HGNC Symbol	dynein axonemal heavy chain 2 [Source:HGNC Symbol;Acc:HGNC:2948]	microtubule-based movement
DNAH2	HGNC Symbol	dynein axonemal heavy chain 2 [Source:HGNC Symbol;Acc:HGNC:2948]	cytoplasm
DNAH2	HGNC Symbol	dynein axonemal heavy chain 2 [Source:HGNC Symbol;Acc:HGNC:2948]	nucleotide binding
DNAH2	HGNC Symbol	dynein axonemal heavy chain 2 [Source:HGNC Symbol;Acc:HGNC:2948]	cytoskeleton
DNAH2	HGNC Symbol	dynein axonemal heavy chain 2 [Source:HGNC Symbol;Acc:HGNC:2948]	cilium
DNAH2	HGNC Symbol	dynein axonemal heavy chain 2 [Source:HGNC Symbol;Acc:HGNC:2948]	motile cilium
DNAH2	HGNC Symbol	dynein axonemal heavy chain 2 [Source:HGNC Symbol;Acc:HGNC:2948]	motor activity
DNAH2	HGNC Symbol	dynein axonemal heavy chain 2 [Source:HGNC Symbol;Acc:HGNC:2948]	cell projection
DNAH2	HGNC Symbol	dynein axonemal heavy chain 2 [Source:HGNC Symbol;Acc:HGNC:2948]	microtubule
DNAH2	HGNC Symbol	dynein axonemal heavy chain 2 [Source:HGNC Symbol;Acc:HGNC:2948]	ATP-dependent microtubule motor activity, minus-end-directed
DNAH2	HGNC Symbol	dynein axonemal heavy chain 2 [Source:HGNC Symbol;Acc:HGNC:2948]	axoneme
DNAH2	HGNC Symbol	dynein axonemal heavy chain 2 [Source:HGNC Symbol;Acc:HGNC:2948]	dynein light intermediate chain binding
DNAH2	HGNC Symbol	dynein axonemal heavy chain 2 [Source:HGNC Symbol;Acc:HGNC:2948]	sperm flagellum
DNAH2	HGNC Symbol	dynein axonemal heavy chain 2 [Source:HGNC Symbol;Acc:HGNC:2948]	dynein intermediate chain binding
DNAH2	HGNC Symbol	dynein axonemal heavy chain 2 [Source:HGNC Symbol;Acc:HGNC:2948]	cilium-dependent cell motility
DNAH2	HGNC Symbol	dynein axonemal heavy chain 2 [Source:HGNC Symbol;Acc:HGNC:2948]	axonemal dynein complex
DNAH2	HGNC Symbol	dynein axonemal heavy chain 2 [Source:HGNC Symbol;Acc:HGNC:2948]
DNAH5	HGNC Symbol	dynein axonemal heavy chain 5 [Source:HGNC Symbol;Acc:HGNC:2950]	ATP binding
DNAH5	HGNC Symbol	dynein axonemal heavy chain 5 [Source:HGNC Symbol;Acc:HGNC:2950]	dynein complex
DNAH5	HGNC Symbol	dynein axonemal heavy chain 5 [Source:HGNC Symbol;Acc:HGNC:2950]	microtubule motor activity
DNAH5	HGNC Symbol	dynein axonemal heavy chain 5 [Source:HGNC Symbol;Acc:HGNC:2950]	microtubule-based movement
DNAH5	HGNC Symbol	dynein axonemal heavy chain 5 [Source:HGNC Symbol;Acc:HGNC:2950]	cytoplasm
DNAH5	HGNC Symbol	dynein axonemal heavy chain 5 [Source:HGNC Symbol;Acc:HGNC:2950]	nucleotide binding
DNAH5	HGNC Symbol	dynein axonemal heavy chain 5 [Source:HGNC Symbol;Acc:HGNC:2950]	cytoskeleton
DNAH5	HGNC Symbol	dynein axonemal heavy chain 5 [Source:HGNC Symbol;Acc:HGNC:2950]	cilium
DNAH5	HGNC Symbol	dynein axonemal heavy chain 5 [Source:HGNC Symbol;Acc:HGNC:2950]	motile cilium
DNAH5	HGNC Symbol	dynein axonemal heavy chain 5 [Source:HGNC Symbol;Acc:HGNC:2950]	motor activity
DNAH5	HGNC Symbol	dynein axonemal heavy chain 5 [Source:HGNC Symbol;Acc:HGNC:2950]	cell projection
DNAH5	HGNC Symbol	dynein axonemal heavy chain 5 [Source:HGNC Symbol;Acc:HGNC:2950]	microtubule
DNAH5	HGNC Symbol	dynein axonemal heavy chain 5 [Source:HGNC Symbol;Acc:HGNC:2950]	ATP-dependent microtubule motor activity, minus-end-directed
DNAH5	HGNC Symbol	dynein axonemal heavy chain 5 [Source:HGNC Symbol;Acc:HGNC:2950]	determination of left/right symmetry
DNAH5	HGNC Symbol	dynein axonemal heavy chain 5 [Source:HGNC Symbol;Acc:HGNC:2950]	outer dynein arm assembly
DNAH5	HGNC Symbol	dynein axonemal heavy chain 5 [Source:HGNC Symbol;Acc:HGNC:2950]	axoneme
DNAH5	HGNC Symbol	dynein axonemal heavy chain 5 [Source:HGNC Symbol;Acc:HGNC:2950]	dynein light intermediate chain binding
DNAH5	HGNC Symbol	dynein axonemal heavy chain 5 [Source:HGNC Symbol;Acc:HGNC:2950]	9+2 motile cilium
DNAH5	HGNC Symbol	dynein axonemal heavy chain 5 [Source:HGNC Symbol;Acc:HGNC:2950]	dynein intermediate chain binding
DNAH5	HGNC Symbol	dynein axonemal heavy chain 5 [Source:HGNC Symbol;Acc:HGNC:2950]	cilium movement
DNAH5	HGNC Symbol	dynein axonemal heavy chain 5 [Source:HGNC Symbol;Acc:HGNC:2950]	flagellated sperm motility
DNAH5	HGNC Symbol	dynein axonemal heavy chain 5 [Source:HGNC Symbol;Acc:HGNC:2950]	cilium assembly
DNAH5	HGNC Symbol	dynein axonemal heavy chain 5 [Source:HGNC Symbol;Acc:HGNC:2950]	outer dynein arm
DNAH5	HGNC Symbol	dynein axonemal heavy chain 5 [Source:HGNC Symbol;Acc:HGNC:2950]	epithelial cilium movement involved in extracellular fluid movement
DNAH5	HGNC Symbol	dynein axonemal heavy chain 5 [Source:HGNC Symbol;Acc:HGNC:2950]	heart development
DNAH5	HGNC Symbol	dynein axonemal heavy chain 5 [Source:HGNC Symbol;Acc:HGNC:2950]	lateral ventricle development
DNAH5	HGNC Symbol	dynein axonemal heavy chain 5 [Source:HGNC Symbol;Acc:HGNC:2950]	establishment of localization in cell
DNAH5	HGNC Symbol	dynein axonemal heavy chain 5 [Source:HGNC Symbol;Acc:HGNC:2950]	axonemal dynein complex
DNAH5	HGNC Symbol	dynein axonemal heavy chain 5 [Source:HGNC Symbol;Acc:HGNC:2950]
DTWD2	HGNC Symbol	DTW domain containing 2 [Source:HGNC Symbol;Acc:HGNC:19334]
DTWD2	HGNC Symbol	DTW domain containing 2 [Source:HGNC Symbol;Acc:HGNC:19334]	nucleus
DTWD2	HGNC Symbol	DTW domain containing 2 [Source:HGNC Symbol;Acc:HGNC:19334]	cytoplasm
DTWD2	HGNC Symbol	DTW domain containing 2 [Source:HGNC Symbol;Acc:HGNC:19334]	transferase activity
DTWD2	HGNC Symbol	DTW domain containing 2 [Source:HGNC Symbol;Acc:HGNC:19334]	tRNA processing
DTWD2	HGNC Symbol	DTW domain containing 2 [Source:HGNC Symbol;Acc:HGNC:19334]	tRNA-uridine aminocarboxypropyltransferase activity
DTWD2	HGNC Symbol	DTW domain containing 2 [Source:HGNC Symbol;Acc:HGNC:19334]	tRNA modification
EGFR	HGNC Symbol	epidermal growth factor receptor [Source:HGNC Symbol;Acc:HGNC:3236]	integral component of membrane
EGFR	HGNC Symbol	epidermal growth factor receptor [Source:HGNC Symbol;Acc:HGNC:3236]	ATP binding
EGFR	HGNC Symbol	epidermal growth factor receptor [Source:HGNC Symbol;Acc:HGNC:3236]	membrane
EGFR	HGNC Symbol	epidermal growth factor receptor [Source:HGNC Symbol;Acc:HGNC:3236]	protein phosphorylation
EGFR	HGNC Symbol	epidermal growth factor receptor [Source:HGNC Symbol;Acc:HGNC:3236]	protein kinase activity
EGFR	HGNC Symbol	epidermal growth factor receptor [Source:HGNC Symbol;Acc:HGNC:3236]	transmembrane receptor protein tyrosine kinase signaling pathway
EGFR	HGNC Symbol	epidermal growth factor receptor [Source:HGNC Symbol;Acc:HGNC:3236]	transmembrane receptor protein tyrosine kinase activity
EGFR	HGNC Symbol	epidermal growth factor receptor [Source:HGNC Symbol;Acc:HGNC:3236]	protein tyrosine kinase activity
EGFR	HGNC Symbol	epidermal growth factor receptor [Source:HGNC Symbol;Acc:HGNC:3236]	positive regulation of cell population proliferation
EGFR	HGNC Symbol	epidermal growth factor receptor [Source:HGNC Symbol;Acc:HGNC:3236]	positive regulation of G1/S transition of mitotic cell cycle
EGFR	HGNC Symbol	epidermal growth factor receptor [Source:HGNC Symbol;Acc:HGNC:3236]	positive regulation of protein kinase B signaling
EGFR	HGNC Symbol	epidermal growth factor receptor [Source:HGNC Symbol;Acc:HGNC:3236]	positive regulation of ERK1 and ERK2 cascade
EGFR	HGNC Symbol	epidermal growth factor receptor [Source:HGNC Symbol;Acc:HGNC:3236]	positive regulation of canonical Wnt signaling pathway
EGFR	HGNC Symbol	epidermal growth factor receptor [Source:HGNC Symbol;Acc:HGNC:3236]	protein binding
EGFR	HGNC Symbol	epidermal growth factor receptor [Source:HGNC Symbol;Acc:HGNC:3236]	nucleus
EGFR	HGNC Symbol	epidermal growth factor receptor [Source:HGNC Symbol;Acc:HGNC:3236]	cytoplasm
EGFR	HGNC Symbol	epidermal growth factor receptor [Source:HGNC Symbol;Acc:HGNC:3236]	nucleotide binding
EGFR	HGNC Symbol	epidermal growth factor receptor [Source:HGNC Symbol;Acc:HGNC:3236]	kinase activity
EGFR	HGNC Symbol	epidermal growth factor receptor [Source:HGNC Symbol;Acc:HGNC:3236]	transferase activity
EGFR	HGNC Symbol	epidermal growth factor receptor [Source:HGNC Symbol;Acc:HGNC:3236]	phosphorylation
EGFR	HGNC Symbol	epidermal growth factor receptor [Source:HGNC Symbol;Acc:HGNC:3236]	negative regulation of apoptotic process
EGFR	HGNC Symbol	epidermal growth factor receptor [Source:HGNC Symbol;Acc:HGNC:3236]	endoplasmic reticulum
EGFR	HGNC Symbol	epidermal growth factor receptor [Source:HGNC Symbol;Acc:HGNC:3236]	endoplasmic reticulum membrane
EGFR	HGNC Symbol	epidermal growth factor receptor [Source:HGNC Symbol;Acc:HGNC:3236]	plasma membrane
EGFR	HGNC Symbol	epidermal growth factor receptor [Source:HGNC Symbol;Acc:HGNC:3236]	Golgi apparatus
EGFR	HGNC Symbol	epidermal growth factor receptor [Source:HGNC Symbol;Acc:HGNC:3236]	endosome
EGFR	HGNC Symbol	epidermal growth factor receptor [Source:HGNC Symbol;Acc:HGNC:3236]	extracellular region
EGFR	HGNC Symbol	epidermal growth factor receptor [Source:HGNC Symbol;Acc:HGNC:3236]	focal adhesion
EGFR	HGNC Symbol	epidermal growth factor receptor [Source:HGNC Symbol;Acc:HGNC:3236]	extracellular space
EGFR	HGNC Symbol	epidermal growth factor receptor [Source:HGNC Symbol;Acc:HGNC:3236]	membrane raft
EGFR	HGNC Symbol	epidermal growth factor receptor [Source:HGNC Symbol;Acc:HGNC:3236]	Golgi membrane
EGFR	HGNC Symbol	epidermal growth factor receptor [Source:HGNC Symbol;Acc:HGNC:3236]	multicellular organism development
EGFR	HGNC Symbol	epidermal growth factor receptor [Source:HGNC Symbol;Acc:HGNC:3236]	nuclear membrane
EGFR	HGNC Symbol	epidermal growth factor receptor [Source:HGNC Symbol;Acc:HGNC:3236]	cell junction
EGFR	HGNC Symbol	epidermal growth factor receptor [Source:HGNC Symbol;Acc:HGNC:3236]	endosome membrane
EGFR	HGNC Symbol	epidermal growth factor receptor [Source:HGNC Symbol;Acc:HGNC:3236]	signal transduction
EGFR	HGNC Symbol	epidermal growth factor receptor [Source:HGNC Symbol;Acc:HGNC:3236]	viral process
EGFR	HGNC Symbol	epidermal growth factor receptor [Source:HGNC Symbol;Acc:HGNC:3236]	cell surface
EGFR	HGNC Symbol	epidermal growth factor receptor [Source:HGNC Symbol;Acc:HGNC:3236]	MAP kinase kinase kinase activity
EGFR	HGNC Symbol	epidermal growth factor receptor [Source:HGNC Symbol;Acc:HGNC:3236]	early endosome membrane
EGFR	HGNC Symbol	epidermal growth factor receptor [Source:HGNC Symbol;Acc:HGNC:3236]	viral entry into host cell
EGFR	HGNC Symbol	epidermal growth factor receptor [Source:HGNC Symbol;Acc:HGNC:3236]	ossification
EGFR	HGNC Symbol	epidermal growth factor receptor [Source:HGNC Symbol;Acc:HGNC:3236]	identical protein binding
EGFR	HGNC Symbol	epidermal growth factor receptor [Source:HGNC Symbol;Acc:HGNC:3236]	integral component of plasma membrane
EGFR	HGNC Symbol	epidermal growth factor receptor [Source:HGNC Symbol;Acc:HGNC:3236]	cell differentiation
[truncated: 5,267 more rows]

## Sheet: MutationDataset2
Gene name	Source of gene name	Gene description	GO term name
ABCA13	HGNC Symbol	ATP binding cassette subfamily A member 13 [Source:HGNC Symbol;Acc:HGNC:14638]	membrane
ABCA13	HGNC Symbol	ATP binding cassette subfamily A member 13 [Source:HGNC Symbol;Acc:HGNC:14638]	integral component of membrane
ABCA13	HGNC Symbol	ATP binding cassette subfamily A member 13 [Source:HGNC Symbol;Acc:HGNC:14638]	transmembrane transport
ABCA13	HGNC Symbol	ATP binding cassette subfamily A member 13 [Source:HGNC Symbol;Acc:HGNC:14638]	nucleotide binding
ABCA13	HGNC Symbol	ATP binding cassette subfamily A member 13 [Source:HGNC Symbol;Acc:HGNC:14638]	ATP binding
ABCA13	HGNC Symbol	ATP binding cassette subfamily A member 13 [Source:HGNC Symbol;Acc:HGNC:14638]	ATPase-coupled transmembrane transporter activity
ABCA13	HGNC Symbol	ATP binding cassette subfamily A member 13 [Source:HGNC Symbol;Acc:HGNC:14638]	plasma membrane
ABCA13	HGNC Symbol	ATP binding cassette subfamily A member 13 [Source:HGNC Symbol;Acc:HGNC:14638]	intracellular membrane-bounded organelle
ABCA13	HGNC Symbol	ATP binding cassette subfamily A member 13 [Source:HGNC Symbol;Acc:HGNC:14638]	neutrophil degranulation
ABCA13	HGNC Symbol	ATP binding cassette subfamily A member 13 [Source:HGNC Symbol;Acc:HGNC:14638]	lipid transporter activity
ABCA13	HGNC Symbol	ATP binding cassette subfamily A member 13 [Source:HGNC Symbol;Acc:HGNC:14638]	secretory granule membrane
ABCA13	HGNC Symbol	ATP binding cassette subfamily A member 13 [Source:HGNC Symbol;Acc:HGNC:14638]	azurophil granule membrane
ABCA13	HGNC Symbol	ATP binding cassette subfamily A member 13 [Source:HGNC Symbol;Acc:HGNC:14638]	lipid transport
ABCA13	HGNC Symbol	ATP binding cassette subfamily A member 13 [Source:HGNC Symbol;Acc:HGNC:14638]	ATPase activity
ABCA13	HGNC Symbol	ATP binding cassette subfamily A member 13 [Source:HGNC Symbol;Acc:HGNC:14638]
ADAMTSL1	HGNC Symbol	ADAMTS like 1 [Source:HGNC Symbol;Acc:HGNC:14632]
ADAMTSL1	HGNC Symbol	ADAMTS like 1 [Source:HGNC Symbol;Acc:HGNC:14632]	peptidase activity
ADAMTSL1	HGNC Symbol	ADAMTS like 1 [Source:HGNC Symbol;Acc:HGNC:14632]	hydrolase activity
ADAMTSL1	HGNC Symbol	ADAMTS like 1 [Source:HGNC Symbol;Acc:HGNC:14632]	extracellular region
ADAMTSL1	HGNC Symbol	ADAMTS like 1 [Source:HGNC Symbol;Acc:HGNC:14632]	proteolysis
ADAMTSL1	HGNC Symbol	ADAMTS like 1 [Source:HGNC Symbol;Acc:HGNC:14632]	extracellular matrix organization
ADAMTSL1	HGNC Symbol	ADAMTS like 1 [Source:HGNC Symbol;Acc:HGNC:14632]	extracellular matrix
ADAMTSL1	HGNC Symbol	ADAMTS like 1 [Source:HGNC Symbol;Acc:HGNC:14632]	metalloendopeptidase activity
ADAMTSL1	HGNC Symbol	ADAMTS like 1 [Source:HGNC Symbol;Acc:HGNC:14632]	endoplasmic reticulum lumen
ADGRG4	HGNC Symbol	adhesion G protein-coupled receptor G4 [Source:HGNC Symbol;Acc:HGNC:18992]	G protein-coupled receptor signaling pathway
ADGRG4	HGNC Symbol	adhesion G protein-coupled receptor G4 [Source:HGNC Symbol;Acc:HGNC:18992]	integral component of membrane
ADGRG4	HGNC Symbol	adhesion G protein-coupled receptor G4 [Source:HGNC Symbol;Acc:HGNC:18992]	G protein-coupled receptor activity
ADGRG4	HGNC Symbol	adhesion G protein-coupled receptor G4 [Source:HGNC Symbol;Acc:HGNC:18992]	cell surface receptor signaling pathway
ADGRG4	HGNC Symbol	adhesion G protein-coupled receptor G4 [Source:HGNC Symbol;Acc:HGNC:18992]	transmembrane signaling receptor activity
ADGRG4	HGNC Symbol	adhesion G protein-coupled receptor G4 [Source:HGNC Symbol;Acc:HGNC:18992]	membrane
ADGRG4	HGNC Symbol	adhesion G protein-coupled receptor G4 [Source:HGNC Symbol;Acc:HGNC:18992]	signal transduction
ADGRG4	HGNC Symbol	adhesion G protein-coupled receptor G4 [Source:HGNC Symbol;Acc:HGNC:18992]	integral component of plasma membrane
ADGRG4	HGNC Symbol	adhesion G protein-coupled receptor G4 [Source:HGNC Symbol;Acc:HGNC:18992]	adenylate cyclase-activating G protein-coupled receptor signaling pathway
ADGRV1	HGNC Symbol	adhesion G protein-coupled receptor V1 [Source:HGNC Symbol;Acc:HGNC:17416]	integral component of membrane
ADGRV1	HGNC Symbol	adhesion G protein-coupled receptor V1 [Source:HGNC Symbol;Acc:HGNC:17416]	G protein-coupled receptor activity
ADGRV1	HGNC Symbol	adhesion G protein-coupled receptor V1 [Source:HGNC Symbol;Acc:HGNC:17416]	negative regulation of adenylate cyclase activity
ADGRV1	HGNC Symbol	adhesion G protein-coupled receptor V1 [Source:HGNC Symbol;Acc:HGNC:17416]	G protein-coupled receptor signaling pathway
ADGRV1	HGNC Symbol	adhesion G protein-coupled receptor V1 [Source:HGNC Symbol;Acc:HGNC:17416]
ADGRV1	HGNC Symbol	adhesion G protein-coupled receptor V1 [Source:HGNC Symbol;Acc:HGNC:17416]	cell communication
ADGRV1	HGNC Symbol	adhesion G protein-coupled receptor V1 [Source:HGNC Symbol;Acc:HGNC:17416]	cell surface receptor signaling pathway
ADGRV1	HGNC Symbol	adhesion G protein-coupled receptor V1 [Source:HGNC Symbol;Acc:HGNC:17416]	transmembrane signaling receptor activity
ADGRV1	HGNC Symbol	adhesion G protein-coupled receptor V1 [Source:HGNC Symbol;Acc:HGNC:17416]	membrane
ADGRV1	HGNC Symbol	adhesion G protein-coupled receptor V1 [Source:HGNC Symbol;Acc:HGNC:17416]	plasma membrane
ADGRV1	HGNC Symbol	adhesion G protein-coupled receptor V1 [Source:HGNC Symbol;Acc:HGNC:17416]	hydrolase activity
ADGRV1	HGNC Symbol	adhesion G protein-coupled receptor V1 [Source:HGNC Symbol;Acc:HGNC:17416]	cell projection
ADGRV1	HGNC Symbol	adhesion G protein-coupled receptor V1 [Source:HGNC Symbol;Acc:HGNC:17416]	stereocilium membrane
ADGRV1	HGNC Symbol	adhesion G protein-coupled receptor V1 [Source:HGNC Symbol;Acc:HGNC:17416]	protein binding
ADGRV1	HGNC Symbol	adhesion G protein-coupled receptor V1 [Source:HGNC Symbol;Acc:HGNC:17416]	signal transduction
ADGRV1	HGNC Symbol	adhesion G protein-coupled receptor V1 [Source:HGNC Symbol;Acc:HGNC:17416]	nervous system development
ADGRV1	HGNC Symbol	adhesion G protein-coupled receptor V1 [Source:HGNC Symbol;Acc:HGNC:17416]	visual perception
ADGRV1	HGNC Symbol	adhesion G protein-coupled receptor V1 [Source:HGNC Symbol;Acc:HGNC:17416]	response to stimulus
ADGRV1	HGNC Symbol	adhesion G protein-coupled receptor V1 [Source:HGNC Symbol;Acc:HGNC:17416]	photoreceptor inner segment
ADGRV1	HGNC Symbol	adhesion G protein-coupled receptor V1 [Source:HGNC Symbol;Acc:HGNC:17416]	extracellular exosome
ADGRV1	HGNC Symbol	adhesion G protein-coupled receptor V1 [Source:HGNC Symbol;Acc:HGNC:17416]	cell surface
ADGRV1	HGNC Symbol	adhesion G protein-coupled receptor V1 [Source:HGNC Symbol;Acc:HGNC:17416]	inner ear receptor cell stereocilium organization
ADGRV1	HGNC Symbol	adhesion G protein-coupled receptor V1 [Source:HGNC Symbol;Acc:HGNC:17416]	regulation of protein stability
ADGRV1	HGNC Symbol	adhesion G protein-coupled receptor V1 [Source:HGNC Symbol;Acc:HGNC:17416]	positive regulation of bone mineralization
ADGRV1	HGNC Symbol	adhesion G protein-coupled receptor V1 [Source:HGNC Symbol;Acc:HGNC:17416]	cytoplasm
ADGRV1	HGNC Symbol	adhesion G protein-coupled receptor V1 [Source:HGNC Symbol;Acc:HGNC:17416]	receptor complex
ADGRV1	HGNC Symbol	adhesion G protein-coupled receptor V1 [Source:HGNC Symbol;Acc:HGNC:17416]	cell-cell adhesion
ADGRV1	HGNC Symbol	adhesion G protein-coupled receptor V1 [Source:HGNC Symbol;Acc:HGNC:17416]	cellular response to calcium ion
ADGRV1	HGNC Symbol	adhesion G protein-coupled receptor V1 [Source:HGNC Symbol;Acc:HGNC:17416]	establishment of protein localization
ADGRV1	HGNC Symbol	adhesion G protein-coupled receptor V1 [Source:HGNC Symbol;Acc:HGNC:17416]	G-protein alpha-subunit binding
ADGRV1	HGNC Symbol	adhesion G protein-coupled receptor V1 [Source:HGNC Symbol;Acc:HGNC:17416]	sensory perception of sound
ADGRV1	HGNC Symbol	adhesion G protein-coupled receptor V1 [Source:HGNC Symbol;Acc:HGNC:17416]	photoreceptor cell maintenance
ADGRV1	HGNC Symbol	adhesion G protein-coupled receptor V1 [Source:HGNC Symbol;Acc:HGNC:17416]	maintenance of animal organ identity
ADGRV1	HGNC Symbol	adhesion G protein-coupled receptor V1 [Source:HGNC Symbol;Acc:HGNC:17416]	sensory perception of light stimulus
ADGRV1	HGNC Symbol	adhesion G protein-coupled receptor V1 [Source:HGNC Symbol;Acc:HGNC:17416]	stereocilia ankle link
ADGRV1	HGNC Symbol	adhesion G protein-coupled receptor V1 [Source:HGNC Symbol;Acc:HGNC:17416]	stereocilia ankle link complex
ADGRV1	HGNC Symbol	adhesion G protein-coupled receptor V1 [Source:HGNC Symbol;Acc:HGNC:17416]	periciliary membrane compartment
ADGRV1	HGNC Symbol	adhesion G protein-coupled receptor V1 [Source:HGNC Symbol;Acc:HGNC:17416]	USH2 complex
ADGRV1	HGNC Symbol	adhesion G protein-coupled receptor V1 [Source:HGNC Symbol;Acc:HGNC:17416]	inner ear development
ADGRV1	HGNC Symbol	adhesion G protein-coupled receptor V1 [Source:HGNC Symbol;Acc:HGNC:17416]	positive regulation of protein kinase C signaling
ADGRV1	HGNC Symbol	adhesion G protein-coupled receptor V1 [Source:HGNC Symbol;Acc:HGNC:17416]	detection of mechanical stimulus involved in sensory perception of sound
ADGRV1	HGNC Symbol	adhesion G protein-coupled receptor V1 [Source:HGNC Symbol;Acc:HGNC:17416]	self proteolysis
ADGRV1	HGNC Symbol	adhesion G protein-coupled receptor V1 [Source:HGNC Symbol;Acc:HGNC:17416]	adenylate cyclase inhibitor activity
ADGRV1	HGNC Symbol	adhesion G protein-coupled receptor V1 [Source:HGNC Symbol;Acc:HGNC:17416]	calcium ion binding
ADGRV1	HGNC Symbol	adhesion G protein-coupled receptor V1 [Source:HGNC Symbol;Acc:HGNC:17416]	positive regulation of protein kinase A signaling
ADGRV1	HGNC Symbol	adhesion G protein-coupled receptor V1 [Source:HGNC Symbol;Acc:HGNC:17416]	nervous system process
ADGRV1	HGNC Symbol	adhesion G protein-coupled receptor V1 [Source:HGNC Symbol;Acc:HGNC:17416]	stereocilium
ADGRV1	HGNC Symbol	adhesion G protein-coupled receptor V1 [Source:HGNC Symbol;Acc:HGNC:17416]	synapse
AFDN	HGNC Symbol	afadin, adherens junction formation factor [Source:HGNC Symbol;Acc:HGNC:7137]	signal transduction
AFDN	HGNC Symbol	afadin, adherens junction formation factor [Source:HGNC Symbol;Acc:HGNC:7137]	plasma membrane
AFDN	HGNC Symbol	afadin, adherens junction formation factor [Source:HGNC Symbol;Acc:HGNC:7137]	cell junction
AFDN	HGNC Symbol	afadin, adherens junction formation factor [Source:HGNC Symbol;Acc:HGNC:7137]	protein binding
AFDN	HGNC Symbol	afadin, adherens junction formation factor [Source:HGNC Symbol;Acc:HGNC:7137]	nuclear speck
AFDN	HGNC Symbol	afadin, adherens junction formation factor [Source:HGNC Symbol;Acc:HGNC:7137]	nucleoplasm
AFDN	HGNC Symbol	afadin, adherens junction formation factor [Source:HGNC Symbol;Acc:HGNC:7137]	cytosol
AFDN	HGNC Symbol	afadin, adherens junction formation factor [Source:HGNC Symbol;Acc:HGNC:7137]	cell adhesion
AFDN	HGNC Symbol	afadin, adherens junction formation factor [Source:HGNC Symbol;Acc:HGNC:7137]	negative regulation of cell migration
AFDN	HGNC Symbol	afadin, adherens junction formation factor [Source:HGNC Symbol;Acc:HGNC:7137]	adherens junction
AFDN	HGNC Symbol	afadin, adherens junction formation factor [Source:HGNC Symbol;Acc:HGNC:7137]	pore complex
AFDN	HGNC Symbol	afadin, adherens junction formation factor [Source:HGNC Symbol;Acc:HGNC:7137]	positive regulation of GTPase activity
AFDN	HGNC Symbol	afadin, adherens junction formation factor [Source:HGNC Symbol;Acc:HGNC:7137]	regulation of protein localization
AFDN	HGNC Symbol	afadin, adherens junction formation factor [Source:HGNC Symbol;Acc:HGNC:7137]	cadherin binding
AFDN	HGNC Symbol	afadin, adherens junction formation factor [Source:HGNC Symbol;Acc:HGNC:7137]	positive regulation of gene expression
AFDN	HGNC Symbol	afadin, adherens junction formation factor [Source:HGNC Symbol;Acc:HGNC:7137]	tight junction
AFDN	HGNC Symbol	afadin, adherens junction formation factor [Source:HGNC Symbol;Acc:HGNC:7137]	cell-cell signaling
AFDN	HGNC Symbol	afadin, adherens junction formation factor [Source:HGNC Symbol;Acc:HGNC:7137]	cell-cell junction
AFDN	HGNC Symbol	afadin, adherens junction formation factor [Source:HGNC Symbol;Acc:HGNC:7137]	pore complex assembly
AFDN	HGNC Symbol	afadin, adherens junction formation factor [Source:HGNC Symbol;Acc:HGNC:7137]	cell adhesion molecule binding
AFDN	HGNC Symbol	afadin, adherens junction formation factor [Source:HGNC Symbol;Acc:HGNC:7137]	adherens junction organization
AFDN	HGNC Symbol	afadin, adherens junction formation factor [Source:HGNC Symbol;Acc:HGNC:7137]	protein C-terminus binding
AFDN	HGNC Symbol	afadin, adherens junction formation factor [Source:HGNC Symbol;Acc:HGNC:7137]	actin filament binding
AFDN	HGNC Symbol	afadin, adherens junction formation factor [Source:HGNC Symbol;Acc:HGNC:7137]	positive regulation of cell-cell adhesion
AFDN	HGNC Symbol	afadin, adherens junction formation factor [Source:HGNC Symbol;Acc:HGNC:7137]	bicellular tight junction assembly
AFDN	HGNC Symbol	afadin, adherens junction formation factor [Source:HGNC Symbol;Acc:HGNC:7137]	cell-cell contact zone
AFDN	HGNC Symbol	afadin, adherens junction formation factor [Source:HGNC Symbol;Acc:HGNC:7137]	cell-cell adhesion mediated by cadherin
AFDN	HGNC Symbol	afadin, adherens junction formation factor [Source:HGNC Symbol;Acc:HGNC:7137]	Ras GTPase binding
AFDN	HGNC Symbol	afadin, adherens junction formation factor [Source:HGNC Symbol;Acc:HGNC:7137]	establishment of protein localization to plasma membrane
AFDN	HGNC Symbol	afadin, adherens junction formation factor [Source:HGNC Symbol;Acc:HGNC:7137]	establishment of endothelial intestinal barrier
AFDN	HGNC Symbol	afadin, adherens junction formation factor [Source:HGNC Symbol;Acc:HGNC:7137]	positive regulation of cell-cell adhesion mediated by cadherin
AFDN	HGNC Symbol	afadin, adherens junction formation factor [Source:HGNC Symbol;Acc:HGNC:7137]
AFDN	HGNC Symbol	afadin, adherens junction formation factor [Source:HGNC Symbol;Acc:HGNC:7137]	telencephalon development
AFDN	HGNC Symbol	afadin, adherens junction formation factor [Source:HGNC Symbol;Acc:HGNC:7137]	cerebral cortex development
AFDN	HGNC Symbol	afadin, adherens junction formation factor [Source:HGNC Symbol;Acc:HGNC:7137]	adherens junction maintenance
AFDN	HGNC Symbol	afadin, adherens junction formation factor [Source:HGNC Symbol;Acc:HGNC:7137]	brain morphogenesis
AFDN	HGNC Symbol	afadin, adherens junction formation factor [Source:HGNC Symbol;Acc:HGNC:7137]	homeostasis of number of cells
AFDN	HGNC Symbol	afadin, adherens junction formation factor [Source:HGNC Symbol;Acc:HGNC:7137]	radial glial cell differentiation
AFDN	HGNC Symbol	afadin, adherens junction formation factor [Source:HGNC Symbol;Acc:HGNC:7137]	neuroepithelial cell differentiation
AFDN	HGNC Symbol	afadin, adherens junction formation factor [Source:HGNC Symbol;Acc:HGNC:7137]	regulation of oligodendrocyte progenitor proliferation
AFDN	HGNC Symbol	afadin, adherens junction formation factor [Source:HGNC Symbol;Acc:HGNC:7137]	protein localization to cell junction
AFDN	HGNC Symbol	afadin, adherens junction formation factor [Source:HGNC Symbol;Acc:HGNC:7137]	cytoplasm
AFDN	HGNC Symbol	afadin, adherens junction formation factor [Source:HGNC Symbol;Acc:HGNC:7137]	apical junction complex
AFDN	HGNC Symbol	afadin, adherens junction formation factor [Source:HGNC Symbol;Acc:HGNC:7137]	apical part of cell
AFF2	HGNC Symbol	AF4/FMR2 family member 2 [Source:HGNC Symbol;Acc:HGNC:3776]	mRNA processing
AFF2	HGNC Symbol	AF4/FMR2 family member 2 [Source:HGNC Symbol;Acc:HGNC:3776]	RNA splicing
AFF2	HGNC Symbol	AF4/FMR2 family member 2 [Source:HGNC Symbol;Acc:HGNC:3776]	nucleus
AFF2	HGNC Symbol	AF4/FMR2 family member 2 [Source:HGNC Symbol;Acc:HGNC:3776]	RNA binding
AFF2	HGNC Symbol	AF4/FMR2 family member 2 [Source:HGNC Symbol;Acc:HGNC:3776]	nuclear speck
AFF2	HGNC Symbol	AF4/FMR2 family member 2 [Source:HGNC Symbol;Acc:HGNC:3776]	regulation of gene expression
AFF2	HGNC Symbol	AF4/FMR2 family member 2 [Source:HGNC Symbol;Acc:HGNC:3776]	regulation of RNA splicing
AFF2	HGNC Symbol	AF4/FMR2 family member 2 [Source:HGNC Symbol;Acc:HGNC:3776]	brain development
AFF2	HGNC Symbol	AF4/FMR2 family member 2 [Source:HGNC Symbol;Acc:HGNC:3776]	G-quadruplex RNA binding
AFF2	HGNC Symbol	AF4/FMR2 family member 2 [Source:HGNC Symbol;Acc:HGNC:3776]	learning or memory
AFF2	HGNC Symbol	AF4/FMR2 family member 2 [Source:HGNC Symbol;Acc:HGNC:3776]	negative regulation of gene expression
AFF2	HGNC Symbol	AF4/FMR2 family member 2 [Source:HGNC Symbol;Acc:HGNC:3776]	nuclear speck organization
AFF2	HGNC Symbol	AF4/FMR2 family member 2 [Source:HGNC Symbol;Acc:HGNC:3776]
AHNAK2	HGNC Symbol	AHNAK nucleoprotein 2 [Source:HGNC Symbol;Acc:HGNC:20125]
AHNAK2	HGNC Symbol	AHNAK nucleoprotein 2 [Source:HGNC Symbol;Acc:HGNC:20125]	nucleus
AHNAK2	HGNC Symbol	AHNAK nucleoprotein 2 [Source:HGNC Symbol;Acc:HGNC:20125]	cytoplasm
AHNAK2	HGNC Symbol	AHNAK nucleoprotein 2 [Source:HGNC Symbol;Acc:HGNC:20125]	cytosol
AHNAK2	HGNC Symbol	AHNAK nucleoprotein 2 [Source:HGNC Symbol;Acc:HGNC:20125]	plasma membrane
AHNAK2	HGNC Symbol	AHNAK nucleoprotein 2 [Source:HGNC Symbol;Acc:HGNC:20125]	sarcolemma
AHNAK2	HGNC Symbol	AHNAK nucleoprotein 2 [Source:HGNC Symbol;Acc:HGNC:20125]	protein binding
AHNAK2	HGNC Symbol	AHNAK nucleoprotein 2 [Source:HGNC Symbol;Acc:HGNC:20125]	cytoplasmic vesicle membrane
AHNAK2	HGNC Symbol	AHNAK nucleoprotein 2 [Source:HGNC Symbol;Acc:HGNC:20125]	Z disc
AHNAK2	HGNC Symbol	AHNAK nucleoprotein 2 [Source:HGNC Symbol;Acc:HGNC:20125]	regulation of RNA splicing
AHNAK2	HGNC Symbol	AHNAK nucleoprotein 2 [Source:HGNC Symbol;Acc:HGNC:20125]	T-tubule
AHNAK2	HGNC Symbol	AHNAK nucleoprotein 2 [Source:HGNC Symbol;Acc:HGNC:20125]	costamere
AK9	HGNC Symbol	adenylate kinase 9 [Source:HGNC Symbol;Acc:HGNC:33814]	ATP binding
AK9	HGNC Symbol	adenylate kinase 9 [Source:HGNC Symbol;Acc:HGNC:33814]	nucleobase-containing compound kinase activity
AK9	HGNC Symbol	adenylate kinase 9 [Source:HGNC Symbol;Acc:HGNC:33814]	nucleobase-containing compound metabolic process
AK9	HGNC Symbol	adenylate kinase 9 [Source:HGNC Symbol;Acc:HGNC:33814]	kinase activity
AK9	HGNC Symbol	adenylate kinase 9 [Source:HGNC Symbol;Acc:HGNC:33814]	transferase activity
AK9	HGNC Symbol	adenylate kinase 9 [Source:HGNC Symbol;Acc:HGNC:33814]	phosphorylation
AK9	HGNC Symbol	adenylate kinase 9 [Source:HGNC Symbol;Acc:HGNC:33814]	nucleoside diphosphate kinase activity
AK9	HGNC Symbol	adenylate kinase 9 [Source:HGNC Symbol;Acc:HGNC:33814]	nucleoside diphosphate phosphorylation
AK9	HGNC Symbol	adenylate kinase 9 [Source:HGNC Symbol;Acc:HGNC:33814]
AK9	HGNC Symbol	adenylate kinase 9 [Source:HGNC Symbol;Acc:HGNC:33814]	nucleus
AK9	HGNC Symbol	adenylate kinase 9 [Source:HGNC Symbol;Acc:HGNC:33814]	cytoplasm
AK9	HGNC Symbol	adenylate kinase 9 [Source:HGNC Symbol;Acc:HGNC:33814]	nucleotide binding
AK9	HGNC Symbol	adenylate kinase 9 [Source:HGNC Symbol;Acc:HGNC:33814]	nucleoplasm
AK9	HGNC Symbol	adenylate kinase 9 [Source:HGNC Symbol;Acc:HGNC:33814]	nuclear membrane
AK9	HGNC Symbol	adenylate kinase 9 [Source:HGNC Symbol;Acc:HGNC:33814]	nucleotide metabolic process
AK9	HGNC Symbol	adenylate kinase 9 [Source:HGNC Symbol;Acc:HGNC:33814]	mitochondrion
AK9	HGNC Symbol	adenylate kinase 9 [Source:HGNC Symbol;Acc:HGNC:33814]	cytosol
AK9	HGNC Symbol	adenylate kinase 9 [Source:HGNC Symbol;Acc:HGNC:33814]	nucleobase-containing small molecule interconversion
AK9	HGNC Symbol	adenylate kinase 9 [Source:HGNC Symbol;Acc:HGNC:33814]	adenylate kinase activity
AK9	HGNC Symbol	adenylate kinase 9 [Source:HGNC Symbol;Acc:HGNC:33814]	purine nucleotide metabolic process
AK9	HGNC Symbol	adenylate kinase 9 [Source:HGNC Symbol;Acc:HGNC:33814]	nucleoside diphosphate metabolic process
AK9	HGNC Symbol	adenylate kinase 9 [Source:HGNC Symbol;Acc:HGNC:33814]	nucleoside monophosphate kinase activity
AK9	HGNC Symbol	adenylate kinase 9 [Source:HGNC Symbol;Acc:HGNC:33814]	dADP phosphorylation
AK9	HGNC Symbol	adenylate kinase 9 [Source:HGNC Symbol;Acc:HGNC:33814]	dGDP phosphorylation
AK9	HGNC Symbol	adenylate kinase 9 [Source:HGNC Symbol;Acc:HGNC:33814]	AMP phosphorylation
AK9	HGNC Symbol	adenylate kinase 9 [Source:HGNC Symbol;Acc:HGNC:33814]	ATP generation from ADP
AK9	HGNC Symbol	adenylate kinase 9 [Source:HGNC Symbol;Acc:HGNC:33814]	CDP phosphorylation
AK9	HGNC Symbol	adenylate kinase 9 [Source:HGNC Symbol;Acc:HGNC:33814]	dAMP phosphorylation
AK9	HGNC Symbol	adenylate kinase 9 [Source:HGNC Symbol;Acc:HGNC:33814]	CMP phosphorylation
AK9	HGNC Symbol	adenylate kinase 9 [Source:HGNC Symbol;Acc:HGNC:33814]	dCMP phosphorylation
AK9	HGNC Symbol	adenylate kinase 9 [Source:HGNC Symbol;Acc:HGNC:33814]	GDP phosphorylation
AK9	HGNC Symbol	adenylate kinase 9 [Source:HGNC Symbol;Acc:HGNC:33814]	UDP phosphorylation
AK9	HGNC Symbol	adenylate kinase 9 [Source:HGNC Symbol;Acc:HGNC:33814]	dCDP phosphorylation
AK9	HGNC Symbol	adenylate kinase 9 [Source:HGNC Symbol;Acc:HGNC:33814]	TDP phosphorylation
AKAP13	HGNC Symbol	A-kinase anchoring protein 13 [Source:HGNC Symbol;Acc:HGNC:371]
AKAP13	HGNC Symbol	A-kinase anchoring protein 13 [Source:HGNC Symbol;Acc:HGNC:371]	regulation of Rho protein signal transduction
AKAP13	HGNC Symbol	A-kinase anchoring protein 13 [Source:HGNC Symbol;Acc:HGNC:371]	cAMP-dependent protein kinase activity
AKAP13	HGNC Symbol	A-kinase anchoring protein 13 [Source:HGNC Symbol;Acc:HGNC:371]	protein phosphorylation
AKAP13	HGNC Symbol	A-kinase anchoring protein 13 [Source:HGNC Symbol;Acc:HGNC:371]	nucleus
AKAP13	HGNC Symbol	A-kinase anchoring protein 13 [Source:HGNC Symbol;Acc:HGNC:371]	cytoplasm
AKAP13	HGNC Symbol	A-kinase anchoring protein 13 [Source:HGNC Symbol;Acc:HGNC:371]	membrane
AKAP13	HGNC Symbol	A-kinase anchoring protein 13 [Source:HGNC Symbol;Acc:HGNC:371]	metal ion binding
AKAP13	HGNC Symbol	A-kinase anchoring protein 13 [Source:HGNC Symbol;Acc:HGNC:371]	cytosol
AKAP13	HGNC Symbol	A-kinase anchoring protein 13 [Source:HGNC Symbol;Acc:HGNC:371]	intracellular signal transduction
AKAP13	HGNC Symbol	A-kinase anchoring protein 13 [Source:HGNC Symbol;Acc:HGNC:371]	guanyl-nucleotide exchange factor activity
AKAP13	HGNC Symbol	A-kinase anchoring protein 13 [Source:HGNC Symbol;Acc:HGNC:371]	protein binding
AKAP13	HGNC Symbol	A-kinase anchoring protein 13 [Source:HGNC Symbol;Acc:HGNC:371]	cell cortex
AKAP13	HGNC Symbol	A-kinase anchoring protein 13 [Source:HGNC Symbol;Acc:HGNC:371]	G protein-coupled receptor signaling pathway
AKAP13	HGNC Symbol	A-kinase anchoring protein 13 [Source:HGNC Symbol;Acc:HGNC:371]	bone development
AKAP13	HGNC Symbol	A-kinase anchoring protein 13 [Source:HGNC Symbol;Acc:HGNC:371]	Rho guanyl-nucleotide exchange factor activity
AKAP13	HGNC Symbol	A-kinase anchoring protein 13 [Source:HGNC Symbol;Acc:HGNC:371]	positive regulation of I-kappaB kinase/NF-kappaB signaling
AKAP13	HGNC Symbol	A-kinase anchoring protein 13 [Source:HGNC Symbol;Acc:HGNC:371]	regulation of small GTPase mediated signal transduction
AKAP13	HGNC Symbol	A-kinase anchoring protein 13 [Source:HGNC Symbol;Acc:HGNC:371]	heart development
AKAP13	HGNC Symbol	A-kinase anchoring protein 13 [Source:HGNC Symbol;Acc:HGNC:371]	actin cytoskeleton
AKAP13	HGNC Symbol	A-kinase anchoring protein 13 [Source:HGNC Symbol;Acc:HGNC:371]	cortical actin cytoskeleton
AKAP13	HGNC Symbol	A-kinase anchoring protein 13 [Source:HGNC Symbol;Acc:HGNC:371]	positive regulation of apoptotic process
AKAP13	HGNC Symbol	A-kinase anchoring protein 13 [Source:HGNC Symbol;Acc:HGNC:371]	Rho GTPase binding
AKAP13	HGNC Symbol	A-kinase anchoring protein 13 [Source:HGNC Symbol;Acc:HGNC:371]	molecular adaptor activity
AKAP13	HGNC Symbol	A-kinase anchoring protein 13 [Source:HGNC Symbol;Acc:HGNC:371]	protein kinase A binding
AKAP13	HGNC Symbol	A-kinase anchoring protein 13 [Source:HGNC Symbol;Acc:HGNC:371]	MAP-kinase scaffold activity
[truncated: 7,083 more rows]

## Sheet: APOBEC3Bgenes
Gene name	Source of gene name	Gene description	GO term name
[truncated: 1,330 more rows]
